# Supplementary material for: Cerebrospinal fluid proteome maps detect pathogen-specific host response patterns in meningitis
Source: eLife. 2021 Apr 6;10:e64159. doi: 10.7554/eLife.64159 (PMC8043743; doi:10.7554/eLife.64159)
Supplement: Supplementary file 2. — The data was manually curated to remove immunoglobulin variable chain proteins. [file elife-64159-supp2.xlsx]

## Sheet: Suppl table 2.
	Supplementary File 2.
	Original data from data-independent acquisition MS-runs (manually curated to remove immunoglobulin variable chain proteins).
	Uniprot	GO_term	Protein	ABM - 1 - L. Monocytogenes	ABM - 123 - B. Fragilis	ABM - 124 - E. Coli	ABM - 125 - E. Faecalis	ABM - 126 - N. Meningitidis	ABM - 127 - S. Pneumoniae T10	ABM - 128 - S. Pneumoniae T8	ABM - 129 - S. Pneumoniae	ABM - 131 - S. Pneumoniae	ABM - 132 - S. Pneumoniae	ABM - 133 - S. Aureus	ABM - 135 - S. Salivarius	ABM - 169 - S. Pneumoniae	ABM - 170 - N. Meningitidis	ABM - 173 - P. Aeruginosa	ABM - 174 - S. Pyogenes	ABM - 175 - S. Pneumoniae	ABM - 176 - S. Pneumoniae T7	ABM - 177 - S. Pneumoniae T9	ABM - 178 - S. Pneumoniae	ABM - 179 - S. Pneumoniae	ABM - 186 - S. Pneumoniae	ABM - 2 - L. Monocytogenes	ABM - 3 - N. Meningitidis	ABM - 30 - S. Pneumoniae	ABM - 31 - S. Aureus	ABM - 32 - N. Meningitidis	ABM - 33 - S. Pneumoniae T9	ABM - 34 - S. Pyogenes	ABM - 35 - S. Agalactiae	ABM - 37 - S. Aureus	ABM - 4 - N. Meningitidis	ABM - 5 - S. Pneumoniae	ABM - 6 - S. Pneumoniae	ABM - 7 - S. Pneumoniae	BM - 10 - Borrelia	BM - 11 - Borrelia	BM - 12 - Borrelia	BM - 50 - Borrelia	BM - 51 - Borrelia	BM - 52 - Borrelia	BM - 9 - Borrelia	Control - 100 - Headache	Control - 101 - Headache	Control - 102 - Headache	Control - 103 - Headache
	P31946	1433B_HUMAN	14-3-3 protein beta/alpha (Protein 1054) (Protein kinase C inhibitor protein 1) (KCIP-1) [Cleaved into: 14-3-3 protein beta/alpha, N-terminally processed]	3.12341e+06	0	0	0	794934	0	1.19532e+06	0	0	759955	0	2.41577e+06	1.51582e+06	0	0	1.25303e+06	0	0	0	458403	1879191	910076	2.71908e+06	6.12073e+06	0	0	0	0	0	475655	7.92403e+06	0	9.82043e+06	0	2617644	0	0	0	0	0	0	0	0	0	0	0
	P62258	1433E_HUMAN	14-3-3 protein epsilon (14-3-3E)	1.05835e+06	0	1.94677e+06	0	448380	0	747404	0	0	699625	0	1813370	1.18566e+06	135559	450843	577411	795911	318056	0	403745	687140	849887	5.39539e+06	2.32945e+06	0	0	0	0	0	533555	4.68067e+06	0	5.15853e+06	1.32029e+06	0	0	0	0	0	0	0	0	0	0	0	0
	Q04917	1433F_HUMAN	14-3-3 protein eta (Protein AS1)	815580	0	800712	0	236156	0	705662	0	0	0	0	0	638352	0	0	0	0	0	0	0	731720	0	3.06499e+06	1.64717e+06	0	0	0	0	0	0	3.80988e+06	0	3.26555e+06	0	0	0	0	0	0	0	0	0	0	0	0	0
	P61981	1433G_HUMAN	14-3-3 protein gamma (Protein kinase C inhibitor protein 1) (KCIP-1) [Cleaved into: 14-3-3 protein gamma, N-terminally processed]	1.80889e+06	0	1.58735e+06	0	272000	143658	1.34245e+06	0	0	0	0	0	860091	116917	405864	467368	659216	0	0	529777	0	320695	4.09633e+06	1.61564e+06	0	0	212785	0	0	633484	3.79926e+06	0	2.5669e+06	0	0	0	0	0	0	0	0	0	0	0	0	0
	P31947	1433S_HUMAN	14-3-3 protein sigma (Epithelial cell marker protein 1) (Stratifin)	0	0	1.7786e+06	0	0	0	0	0	0	0	0	0	0	0	0	0	0	0	0	0	0	0	0	0	0	0	0	0	0	0	0	0	0	0	0	0	0	0	0	0	0	0	0	0	0	0
	P27348	1433T_HUMAN	14-3-3 protein theta (14-3-3 protein T-cell) (14-3-3 protein tau) (Protein HS1)	961309	0	1.1677e+06	0	0	0	485616	0	0	0	0	0	0	0	0	0	0	0	0	0	751617	0	2.13615e+06	996637	0	0	0	0	0	0	1.58168e+06	0	1.5873e+06	0	0	0	0	0	0	0	0	0	0	0	0	0
	P63104	1433Z_HUMAN	14-3-3 protein zeta/delta (Protein kinase C inhibitor protein 1) (KCIP-1)	2.31667e+06	0	1.71536e+06	0	787592	0	1.71671e+06	0	0	747335	0	0	1.10478e+06	0	0	785788	871304	195338	0	897372	1.42305e+06	1.1511e+06	4.94979e+06	5.11087e+06	0	0	358422	0	302787	0	6.09246e+06	0	6.86753e+06	0	0	0	0	0	0	0	0	201485	0	0	0	0
	P52209	6PGD_HUMAN	6-phosphogluconate dehydrogenase, decarboxylating (EC 1.1.1.44)	4.76307e+06	0	3.13539e+06	1.17176e+06	1.18129e+06	363060	1.43095e+06	0	1.9178e+06	1.6113e+06	452464	3.45018e+06	1.94793e+06	0	644958	1.34941e+06	724541	332083	0	232928	1.99598e+06	1.48689e+06	5.05726e+06	7.99557e+06	0	0	0	0	0	981844	1.11594e+07	517940	1.52147e+07	5.46041e+06	1.58758e+06	0	0	0	0	0	0	0	0	0	0	0
	O95336	6PGL_HUMAN	6-phosphogluconolactonase (6PGL) (EC 3.1.1.31)	0	0	0	0	0	0	0	0	0	0	0	0	0	0	0	0	0	0	0	0	0	0	0	0	0	0	0	0	0	0	0	0	2.26488e+06	0	0	0	0	0	0	0	0	0	0	0	0	0
	P08253	MMP2_HUMAN	72 kDa type IV collagenase (EC 3.4.24.24) (72 kDa gelatinase) (Gelatinase A) (Matrix metalloproteinase-2) (MMP-2) (TBE-1) [Cleaved into: PEX]	954230	785734	0	0	402139	0	0	0	0	1.35485e+06	0	0	201151	0	425261	0	0	299549	324102	0	3.91613e+06	0	1.89914e+06	0	627830	424350	0	0	174242	857607	915356	1.15618e+06	1.68588e+06	0	0	443951	396315	614251	794396	450161	394630	662047	309020	710292	504261	509941
	P11021	GRP78_HUMAN	78 kDa glucose-regulated protein (GRP-78) (Endoplasmic reticulum lumenal Ca(2+)-binding protein grp78) (Heat shock 70 kDa protein 5) (Immunoglobulin heavy chain-binding protein) (BiP)	1.26866e+06	329712	997559	0	438170	0	552041	0	0	806580	0	0	0	0	0	0	0	0	0	0	513150	0	1.08486e+06	1.10513e+06	0	0	0	0	0	0	2.13929e+06	0	2.29005e+06	0	0	639831	248351	457323	0	0	420969	304712	0	460763	344600	0
	P39687	AN32A_HUMAN	Acidic leucine-rich nuclear phosphoprotein 32 family member A (Acidic nuclear phosphoprotein pp32) (pp32) (Leucine-rich acidic nuclear protein) (LANP) (Mapmodulin) (Potent heat-stable protein phosphatase 2A inhibitor I1PP2A) (Putative HLA-DR-associated protein I) (PHAPI)	0	0	0	0	0	0	0	0	0	0	0	0	0	0	0	0	0	0	0	0	0	0	0	0	0	0	0	0	0	0	0	0	6.43588e+06	0	0	0	0	0	0	0	0	0	0	0	0	0
	P61160	ARP2_HUMAN	Actin-related protein 2 (Actin-like protein 2)	980411	0	0	0	389328	0	615204	0	0	0	0	1.35276e+06	1.24039e+06	0	675479	743569	0	0	0	0	921582	1.12607e+06	2.80529e+06	5.33613e+06	0	0	0	0	0	0	3.08297e+06	0	4.06751e+06	0	0	0	0	0	0	0	0	0	0	0	0	0
	O15143	ARC1B_HUMAN	Actin-related protein 2/3 complex subunit 1B (Arp2/3 complex 41 kDa subunit) (p41-ARC)	929864	0	0	0	518277	0	0	0	0	0	0	886598	928823	0	0	736878	0	0	0	0	636959	0	1.50323e+06	2.04606e+06	0	0	0	0	0	0	3148324	0	3.40868e+06	0	0	0	0	0	0	0	0	0	0	0	0	0
	O15144	ARPC2_HUMAN	Actin-related protein 2/3 complex subunit 2 (Arp2/3 complex 34 kDa subunit) (p34-ARC)	7.47369e+06	0	0	6174418	0	0	4.00319e+06	0	0	0	0	4.25759e+07	6.82504e+06	0	1.63694e+07	1.12704e+07	0	0	0	0	597417	3.20209e+06	1.36636e+07	0	0	0	0	0	0	0	2.39201e+06	0	1.65206e+07	0	0	0	0	0	0	0	0	0	0	0	0	0
	O15145	ARPC3_HUMAN	Actin-related protein 2/3 complex subunit 3 (Arp2/3 complex 21 kDa subunit) (p21-ARC)	1.04397e+06	0	0	0	297140	0	0	0	0	0	0	1.94579e+06	793146	0	0	0	0	0	0	0	780502	584807	0	1.41772e+06	0	0	0	0	0	0	0	0	3.37445e+06	1.1375e+06	0	0	0	0	0	0	0	0	0	0	0	0
	P59998	ARPC4_HUMAN	Actin-related protein 2/3 complex subunit 4 (Arp2/3 complex 20 kDa subunit) (p20-ARC)	2.73203e+06	0	0	0	0	0	1.54853e+06	0	0	0	0	1.14568e+06	2.9515e+06	0	0	2.24268e+06	0	0	0	0	2.0896e+06	1.64322e+06	4.15789e+06	4.32211e+06	0	0	0	0	0	0	5.17836e+06	0	4.48214e+06	0	0	0	0	0	0	0	0	0	0	0	0	0
	O15511	ARPC5_HUMAN	Actin-related protein 2/3 complex subunit 5 (Arp2/3 complex 16 kDa subunit) (p16-ARC)	0	0	0	0	0	0	0	0	0	0	0	0	0	0	0	0	0	0	0	0	0	0	0	0	0	0	0	0	0	0	0	0	6.43134e+06	0	0	0	0	0	0	0	0	0	0	0	0	0
	P61158	ARP3_HUMAN	Actin-related protein 3 (Actin-like protein 3)	1.11855e+06	0	544473	0	214934	0	597075	0	0	0	0	938233	1.02057e+06	0	0	681394	0	0	0	0	868085	1.06706e+06	2.2353e+06	4.91888e+06	0	0	0	0	0	0	3.75488e+06	0	3.45584e+06	0	0	0	0	0	0	0	0	0	0	0	0	0
	P60709	ACTB_HUMAN	Actin, cytoplasmic 1 (Beta-actin) [Cleaved into: Actin, cytoplasmic 1, N-terminally processed]	1.47719e+07	0	0	0	0	0	0	0	0	0	0	0	5.14598e+06	0	1.30054e+06	5.20863e+06	793038	1.02505e+06	0	1.53491e+06	1.4168e+07	2.21891e+07	5.01434e+07	1.76242e+08	0	0	0	0	0	0	0	5.09655e+06	2.46616e+07	9.85585e+06	6.15916e+06	0	0	0	0	0	0	0	0	0	0	0
	P63261	ACTG_HUMAN	Actin, cytoplasmic 2 (Gamma-actin) [Cleaved into: Actin, cytoplasmic 2, N-terminally processed]	0	0	0	0	0	0	0	0	0	0	0	0	0	0	0	3.23934e+06	0	0	0	0	4.96445e+06	3483768	1.987e+07	0	0	0	0	0	0	0	0	0	1.13112e+07	0	0	0	0	0	0	0	0	0	0	0	0	0
	P07108	ACBP_HUMAN	Acyl-CoA-binding protein (ACBP) (Diazepam-binding inhibitor) (DBI) (Endozepine) (EP)	647400	881673	0	0	330291	0	916178	0	0	0	0	0	598218	164901	0	0	0	0	0	296235	629611	359442	0	0	0	0	0	0	0	0	5.00195e+06	0	2.04601e+06	0	0	421700	328611	540257	0	0	0	632626	0	0	334233	0
	P14621	ACYP2_HUMAN	Acylphosphatase-2 (EC 3.6.1.7) (Acylphosphatase, muscle type isozyme) (Acylphosphate phosphohydrolase 2)	0	0	0	0	0	0	0	0	0	0	0	0	0	0	0	0	0	0	0	0	0	0	0	0	0	0	0	0	0	0	0	0	0	0	0	0	0	303361	0	0	0	0	0	0	0	0
	Q9NZK5	CECR1_HUMAN	Adenosine deaminase CECR1 (EC 3.5.4.4) (Cat eye syndrome critical region protein 1)	949934	0	0	0	0	0	0	0	0	0	0	0	0	0	0	0	0	0	0	0	0	0	0	0	0	0	0	0	0	0	0	0	1.19275e+06	0	0	0	0	0	0	355050	0	0	0	0	0	0
	P23526	SAHH_HUMAN	Adenosylhomocysteinase (AdoHcyase) (EC 3.3.1.1) (S-adenosyl-L-homocysteine hydrolase)	0	0	0	0	0	0	0	0	0	0	0	0	0	0	0	0	0	0	0	0	0	0	0	0	0	0	0	0	0	0	2.54134e+06	0	2.77333e+06	0	0	0	0	0	0	0	0	0	0	0	0	0
	P00568	KAD1_HUMAN	Adenylate kinase isoenzyme 1 (AK 1) (EC 2.7.4.3) (EC 2.7.4.6) (ATP-AMP transphosphorylase 1) (ATP:AMP phosphotransferase) (Adenylate monophosphate kinase) (Myokinase)	0	0	0	0	0	0	0	0	0	0	0	0	0	0	0	0	0	0	0	0	0	0	0	0	0	0	0	0	0	0	0	0	0	0	0	0	0	0	0	0	0	0	0	0	0	0
	P30520	PURA2_HUMAN	Adenylosuccinate synthetase isozyme 2 (AMPSase 2) (AdSS 2) (EC 6.3.4.4) (Adenylosuccinate synthetase, acidic isozyme) (Adenylosuccinate synthetase, liver isozyme) (L-type adenylosuccinate synthetase) (IMP--aspartate ligase 2)	0	0	0	0	0	0	0	0	0	0	0	0	374860	0	0	296743	0	0	0	0	416864	0	694089	2.60093e+06	0	0	0	0	0	0	0	0	910944	0	0	0	0	0	0	0	0	0	0	0	0	0
	Q01518	CAP1_HUMAN	Adenylyl cyclase-associated protein 1 (CAP 1)	786784	0	587113	530882	402819	0	578411	0	0	441003	0	859584	837360	0	2.66085e+06	501866	0	0	0	162249	1213784	1.08227e+06	1.18131e+06	6.96815e+06	0	0	0	0	0	0	2.16037e+06	0	3.12889e+06	2.2923e+06	0	0	0	0	0	0	0	0	0	0	0	0
	O60241	BAI2_HUMAN	Adhesion G protein-coupled receptor B2 (Brain-specific angiogenesis inhibitor 2)	0	593936	0	0	263263	0	0	0	0	0	0	0	0	0	0	0	0	0	154623	0	0	0	0	0	1.90311e+06	0	0	0	0	0	0	0	0	0	0	610103	705384	644322	472969	276681	0	464098	352646	767954	477376	714174
	O94910	LPHN1_HUMAN	Adhesion G protein-coupled receptor L1 (Calcium-independent alpha-latrotoxin receptor 1) (CIRL-1) (Latrophilin-1) (Lectomedin-2)	0	541160	0	0	194674	0	0	0	0	0	0	0	0	0	0	0	0	0	154563	0	0	0	0	0	1.21735e+06	0	0	0	0	0	0	0	0	0	0	326762	243276	476321	769772	887154	554417	317027	348415	1.04092e+06	514597	638333
	Q9HAR2	LPHN3_HUMAN	Adhesion G protein-coupled receptor L3 (Calcium-independent alpha-latrotoxin receptor 3) (CIRL-3) (Latrophilin-3) (Lectomedin-3)	0	0	0	0	0	0	0	0	0	0	0	0	0	0	0	0	0	0	0	0	0	0	0	0	0	0	0	0	0	0	0	0	0	0	0	0	0	181696	0	0	0	0	0	0	0	0
	Q8IUX7	AEBP1_HUMAN	Adipocyte enhancer-binding protein 1 (AE-binding protein 1) (Aortic carboxypeptidase-like protein)	376935	201657	0	0	0	0	0	0	0	0	0	0	0	0	0	0	0	0	0	0	0	0	0	0	0	0	0	0	0	0	0	0	0	0	0	0	113742	181884	0	0	0	0	93755.6	0	0	302872
	P35318	ADML_HUMAN	ADM [Cleaved into: Adrenomedullin (AM); Proadrenomedullin N-20 terminal peptide (ProAM N-terminal 20 peptide) (PAMP) (ProAM-N20)]	0	461865	0	0	0	0	0	0	0	0	0	0	563277	0	0	0	0	642155	0	242192	496621	0	2.34304e+06	0	0	0	0	0	0	0	4.52527e+06	0	2.63798e+06	0	0	0	0	0	0	0	0	0	0	0	0	0
	Q10588	BST1_HUMAN	ADP-ribosyl cyclase/cyclic ADP-ribose hydrolase 2 (EC 3.2.2.6) (ADP-ribosyl cyclase 2) (Bone marrow stromal antigen 1) (BST-1) (Cyclic ADP-ribose hydrolase 2) (cADPr hydrolase 2) (CD antigen CD157)	1.32402e+06	0	0	0	0	0	0	0	0	3.40777e+06	0	0	0	0	0	0	0	0	0	502241	1.29854e+06	1.29359e+06	0	0	0	0	0	0	0	0	0	0	2.60945e+06	0	0	0	0	0	0	0	0	0	0	0	0	0
	P43652	AFAM_HUMAN	Afamin (Alpha-albumin) (Alpha-Alb)	2.4603e+06	1.42782e+06	4.2914e+06	3.62705e+06	675135	2.28158e+06	2.5301e+06	332453	1.2426e+07	5.49438e+06	2.73805e+06	1.02137e+07	4.09939e+06	280925	8.49641e+06	5.49762e+06	5.61885e+06	3.80775e+06	1.91852e+06	1.91481e+06	4.77032e+06	4.45236e+06	5.94344e+06	3.86354e+06	1.26718e+06	892229	1.16699e+06	334179	780213	3.34705e+06	8.80783e+06	1.15814e+07	2.34296e+06	4.32392e+07	4.5804e+07	2.53666e+06	1.63752e+06	4.31034e+06	6.25183e+06	3.50109e+06	3.76396e+06	1.81164e+06	1.54983e+06	9.02938e+06	1.33879e+06	2.16217e+06
	O00468	AGRIN_HUMAN	Agrin [Cleaved into: Agrin N-terminal 110 kDa subunit; Agrin C-terminal 110 kDa subunit; Agrin C-terminal 90 kDa fragment (C90); Agrin C-terminal 22 kDa fragment (C22)]	1.07702e+06	1.3556e+06	0	0	604807	0	0	0	0	0	0	0	0	0	0	0	0	0	389990	0	0	0	1.26469e+06	0	1.72854e+06	0	0	0	0	1.49435e+06	0	0	2.65317e+06	0	0	1.40962e+06	1.37584e+06	1.69174e+06	1.48063e+06	956111	0	1.03333e+06	515364	1.64225e+06	1.03552e+06	1.32401e+06
	P02763	A1AG1_HUMAN	Alpha-1-acid glycoprotein 1 (AGP 1) (Orosomucoid-1) (OMD 1)	2.40043e+08	3.62081e+07	2.32562e+08	4.63873e+07	2.56481e+07	1.08954e+08	9.9874e+07	1.01131e+07	2.00923e+09	3.13052e+08	3.45077e+08	8.16815e+07	2.26469e+08	7.44769e+06	1.80135e+08	9.76272e+07	1.80866e+08	1.35617e+08	6.32625e+07	1.12649e+08	1.11092e+08	2.73378e+07	7.33531e+08	6.23973e+07	2.22565e+07	7.4474e+07	2.92059e+07	1.27785e+07	3.32882e+07	9.10463e+07	8.18475e+08	2.36756e+08	5.62966e+08	1.28316e+09	5.63953e+08	3.38415e+07	1.5546e+07	4.27616e+07	4.09261e+07	3.15824e+07	2.89742e+07	7.74983e+07	1.19953e+07	3.26379e+07	2.14192e+07	2.18745e+07
	P19652	A1AG2_HUMAN	Alpha-1-acid glycoprotein 2 (AGP 2) (Orosomucoid-2) (OMD 2)	6.11522e+07	1.08373e+07	4.66057e+07	1.65663e+07	8.62714e+06	1.86402e+07	3.23267e+07	2.58527e+06	4.15953e+08	9.37733e+07	7.56565e+07	2.95162e+07	3.44638e+07	2.96524e+06	3.38104e+07	1.90418e+07	6.9201e+07	2.42487e+07	1.07179e+07	1.8532e+07	2.1688e+07	2.94575e+07	8.99443e+07	2.44306e+07	8.93665e+06	2.97379e+07	8569515	1.80981e+07	1.44715e+07	2.30802e+07	1.43552e+08	5.80918e+07	8.80765e+07	2.06453e+08	1.29916e+08	8.88342e+06	6.74055e+06	1.19234e+07	1.41695e+07	1.30055e+07	8.37422e+06	1.39889e+07	7.83026e+06	2.13151e+07	1.3294e+07	1.48407e+07
	P01011	AACT_HUMAN	Alpha-1-antichymotrypsin (ACT) (Cell growth-inhibiting gene 24/25 protein) (Serpin A3) [Cleaved into: Alpha-1-antichymotrypsin His-Pro-less]	8.31381e+07	2.29137e+07	4.92099e+07	1.35358e+07	2.05218e+07	3.78755e+07	1.89397e+07	8.33047e+06	3.74696e+08	1.20636e+08	6.54893e+07	5.31604e+07	4.84747e+07	8.26685e+06	3.46106e+07	2.53368e+07	6.60439e+07	4.79096e+07	2.69008e+07	3.79603e+07	2.54912e+07	1.37188e+07	1.20744e+08	0	1.01302e+07	2.68895e+07	8.27565e+06	1.35134e+07	2.45605e+07	6.77565e+07	1.4489e+08	8.90271e+07	1.36473e+08	2.9975e+08	9.28025e+07	3.92091e+06	3.35542e+06	7.59412e+06	1.51479e+07	1.49547e+07	1.32342e+07	9.36941e+06	7.74936e+06	2.14963e+07	1.0561e+07	1.21034e+07
	P01009	A1AT_HUMAN	Alpha-1-antitrypsin (Alpha-1 protease inhibitor) (Alpha-1-antiproteinase) (Serpin A1) [Cleaved into: Short peptide from AAT (SPAAT)]	1.27435e+08	4.46883e+07	1.08496e+08	5.50965e+07	2.83092e+07	6.34397e+07	2.19861e+07	2.09062e+07	6.00048e+08	2.51619e+08	1.47256e+08	1.32558e+08	1.43971e+08	6.78828e+06	8.39485e+07	6.3951e+07	1.68347e+08	5.98555e+07	4.57234e+07	8.25334e+07	2.30299e+07	3.48731e+07	3.14839e+08	6.06204e+06	2.83295e+07	7.76801e+07	2.8518e+07	3.13039e+07	4.77352e+07	1.00534e+08	3.49303e+08	1.23484e+08	1.8267e+08	5.46201e+08	4.12115e+08	2.4713e+06	1.18672e+06	2.62914e+06	6.13193e+07	7.6921e+07	3.68052e+07	4.20966e+06	2.70517e+07	6.59317e+07	3.66694e+07	6.61532e+07
	P04217	A1BG_HUMAN	Alpha-1B-glycoprotein (Alpha-1-B glycoprotein)	3.81222e+07	7.47053e+06	2.73214e+07	1.19802e+07	2.8252e+06	9.86826e+06	1.27324e+07	2.0747e+06	1.16054e+08	4.53606e+07	1.44159e+07	3.78232e+07	2.85744e+07	1.03831e+06	2.62558e+07	1.98426e+07	4.13951e+07	1.63452e+07	5.39109e+06	8.4698e+06	2.91674e+07	1.34435e+07	6.67355e+07	15825123	2.81102e+06	6.9676e+06	4.22297e+06	3.21735e+06	6.09814e+06	9.61345e+06	5.29497e+07	3.55624e+07	3.89071e+07	3.15499e+08	5.54382e+07	9.78554e+06	5.902e+06	8.26821e+06	1.20822e+07	1.27217e+07	1.15414e+07	1.09186e+07	5.79401e+06	1.27128e+07	5.81602e+06	1.05532e+07
	P08697	A2AP_HUMAN	Alpha-2-antiplasmin (Alpha-2-AP) (Alpha-2-plasmin inhibitor) (Alpha-2-PI) (Serpin F2)	2.51749e+06	2.74175e+06	5.41684e+06	2.66097e+06	2.79717e+06	2.35083e+06	3.73933e+06	515846	4.08296e+07	8.6469e+06	4.46848e+06	7.24001e+06	6.7148e+06	299069	8.71423e+06	3.61381e+06	8.28482e+06	4.6134e+06	2.71025e+06	3.12792e+06	2.74499e+06	2.49488e+06	5.8041e+06	1.09015e+06	2.09059e+06	1.6414e+06	1.31559e+06	973684	1.67034e+06	4.3826e+06	1.6664e+07	1.2671e+06	8.50072e+06	9.26914e+06	1.72617e+07	4.02968e+06	2.61666e+06	4.25901e+06	5.66972e+06	4.83725e+06	3.70217e+06	6.09787e+06	1.95479e+06	4.25508e+06	2.85237e+06	3.58495e+06
	P02765	FETUA_HUMAN	Alpha-2-HS-glycoprotein (Alpha-2-Z-globulin) (Ba-alpha-2-glycoprotein) (Fetuin-A) [Cleaved into: Alpha-2-HS-glycoprotein chain A; Alpha-2-HS-glycoprotein chain B]	1.75488e+07	8.43708e+06	1.49164e+07	1.70516e+07	2.92134e+06	5.1824e+06	1.19394e+07	2.40924e+06	9.11787e+07	2.61322e+07	9.60617e+06	3.29507e+07	2.16739e+07	1.04679e+06	2.17614e+07	2.39863e+07	3.71003e+07	1.54914e+07	3.19623e+06	4.6266e+06	1.47051e+07	1.93535e+07	4.42688e+07	2.32651e+07	7.57286e+06	5.24081e+06	3.81439e+06	2.13116e+06	3.34016e+06	1.6706e+07	2.66613e+07	4.43476e+07	2.78948e+07	3.08207e+08	1.26304e+08	1.51264e+07	9.02235e+06	1.56759e+07	2.54563e+07	1.85353e+07	1.42628e+07	7.71816e+06	1.17998e+07	2.26027e+07	8.49752e+06	1.50871e+07
	P01023	A2MG_HUMAN	Alpha-2-macroglobulin (Alpha-2-M) (C3 and PZP-like alpha-2-macroglobulin domain-containing protein 5)	1.60251e+07	1.11519e+07	1.73638e+07	2.64568e+07	3.54053e+06	1.32432e+07	9.85483e+06	3.31342e+06	1.45048e+08	3.40184e+07	2.566e+07	1.00388e+08	3.01961e+07	2.48744e+06	2.27336e+07	2.14086e+07	2.76126e+07	1.38446e+07	3.17469e+06	7.86655e+06	8.26449e+06	1.82248e+07	2.75205e+07	1.40223e+07	6.68744e+06	1.27871e+07	1.19407e+07	3.11982e+06	4.80903e+06	2.15482e+07	4.86964e+07	1.63437e+07	2.57691e+07	1.15975e+08	1.07407e+08	4.39371e+06	2.91699e+06	4.17228e+06	8.51179e+06	9.59319e+06	7.64944e+06	4.06447e+06	3.05581e+06	8.07004e+06	4.86746e+06	5.73217e+06
	P12814	ACTN1_HUMAN	Alpha-actinin-1 (Alpha-actinin cytoskeletal isoform) (F-actin cross-linking protein) (Non-muscle alpha-actinin-1)	1.02971e+07	0	1.07412e+06	848370	469085	0	1.0384e+06	0	0	0	0	1.16617e+06	740341	0	0	592513	0	0	0	0	8.07285e+06	729942	3.1013e+06	5.45406e+06	0	0	209934	0	0	0	6.9494e+06	0	1.50582e+07	0	0	0	0	0	0	0	0	0	0	0	0	0
	O43707	ACTN4_HUMAN	Alpha-actinin-4 (Non-muscle alpha-actinin 4)	1.03588e+06	0	727443	0	306775	0	592853	0	0	0	0	0	526427	0	0	539840	0	0	0	0	723202	399947	2.42151e+06	3.47142e+06	0	0	0	0	0	0	2.55966e+06	0	3.76831e+06	0	0	0	0	0	0	0	0	0	0	0	0	0
	P06733	ENOA_HUMAN	Alpha-enolase (EC 4.2.1.11) (2-phospho-D-glycerate hydro-lyase) (C-myc promoter-binding protein) (Enolase 1) (MBP-1) (MPB-1) (Non-neural enolase) (NNE) (Phosphopyruvate hydratase) (Plasminogen-binding protein)	3.25093e+06	0	4.35101e+06	1.37072e+06	688320	510959	2.86415e+06	0	0	1.64554e+06	990953	3.32603e+06	2.9021e+06	275619	598121	2.10756e+06	1.39594e+06	729276	0	931806	2.93722e+06	2.2485e+06	7.43733e+06	7.11311e+06	0	650115	905900	180278	0	933014	6.98398e+06	874952	8.35214e+06	0	2.48004e+06	186860	201236	0	0	0	0	188593	0	0	0	87723.6
	Q9NZD4	AHSP_HUMAN	Alpha-hemoglobin-stabilizing protein (Erythroid differentiation-related factor) (Erythroid-associated factor)	1.00977e+07	0	3.8413e+06	0	0	0	0	0	0	0	0	0	0	0	0	0	0	0	0	0	0	0	0	0	0	0	0	0	0	0	0	0	0	0	0	0	0	0	0	0	0	0	0	0	0	0
	P49641	MA2A2_HUMAN	Alpha-mannosidase 2x (EC 3.2.1.114) (Alpha-mannosidase IIx) (Man IIx) (Mannosidase alpha class 2A member 2) (Mannosyl-oligosaccharide 1,3-1,6-alpha-mannosidase)	0	432643	0	0	0	0	0	0	0	0	0	0	0	0	0	0	0	0	0	0	0	0	510184	0	1.18909e+06	0	0	0	0	0	0	0	1.77841e+06	0	0	454575	303566	443291	0	0	0	359292	309197	0	625977	558581
	P05067	A4_HUMAN	Amyloid beta A4 protein (ABPP) (APPI) (APP) (Alzheimer disease amyloid protein) (Amyloid precursor protein) (Beta-amyloid precursor protein) (Cerebral vascular amyloid peptide) (CVAP) (PreA4) (Protease nexin-II) (PN-II) [Cleaved into: N-APP; Soluble APP-alpha (S-APP-alpha); Soluble APP-beta (S-APP-beta); C99; Beta-amyloid protein 42 (Beta-APP42); Beta-amyloid protein 40 (Beta-APP40); C83; P3(42);…	3.15635e+06	4.08869e+06	1.00461e+06	0	1.69876e+06	530063	1.07571e+06	0	4.50111e+06	1.8055e+06	794396	0	960403	343435	960053	998358	1.67786e+06	754195	1.01838e+06	620218	1.8984e+06	1.36791e+06	2.90742e+06	410135	5.70625e+06	506911	461880	0	877733	1112413	1.42192e+06	1.98023e+06	4.20102e+06	6.61569e+06	1.66745e+06	3.7402e+06	4.73126e+06	6.28018e+06	5.93949e+06	3.44414e+06	2.948e+06	4.86206e+06	2.04411e+06	3.33213e+06	4.9697e+06	4.55791e+06
	P51693	APLP1_HUMAN	Amyloid-like protein 1 (APLP) (APLP-1) [Cleaved into: C30]	4.64769e+06	1.11123e+07	2.74017e+06	1.27925e+06	3.33987e+06	1.17943e+06	1.88741e+06	293947	6.05956e+06	4.54528e+06	3.14603e+06	1.56311e+06	1.44231e+06	2.4588e+06	1.51048e+06	1.13543e+06	2.02641e+06	1.39148e+06	2.33815e+06	957498	2.67511e+06	599527	3.44385e+06	1.65045e+06	1.40563e+07	1.42217e+06	480130	378086	1.23822e+06	3.23112e+06	2.74632e+06	3.23323e+06	8.12269e+06	1.48198e+07	4.50312e+06	8.95437e+06	8.57948e+06	1.0412e+07	9.37077e+06	6.36626e+06	4.49864e+06	9.17036e+06	5.12472e+06	1.1175e+07	7.48343e+06	1.0547e+07
	Q06481	APLP2_HUMAN	Amyloid-like protein 2 (APLP-2) (APPH) (Amyloid protein homolog) (CDEI box-binding protein) (CDEBP)	2.55541e+06	3.76547e+06	0	0	1.41174e+06	0	0	0	0	0	1.31917e+06	0	0	0	0	0	0	170692	455600	526586	617016	0	699242	0	5.54454e+06	1.05796e+06	0	0	725638	0	0	0	3.6886e+06	0	0	3.60048e+06	2.63881e+06	4.96038e+06	4.73608e+06	2.56476e+06	2.92586e+06	3.05847e+06	1.56277e+06	3.29407e+06	2.3313e+06	2.55437e+06
	P01019	ANGT_HUMAN	Angiotensinogen (Serpin A8) [Cleaved into: Angiotensin-1 (Angiotensin 1-10) (Angiotensin I) (Ang I); Angiotensin-2 (Angiotensin 1-8) (Angiotensin II) (Ang II); Angiotensin-3 (Angiotensin 2-8) (Angiotensin III) (Ang III) (Des-Asp[1]-angiotensin II); Angiotensin-4 (Angiotensin 3-8) (Angiotensin IV) (Ang IV); Angiotensin 1-9; Angiotensin 1-7; Angiotensin 1-5; Angiotensin 1-4]	1.65445e+07	1.12835e+07	9.34653e+06	5.61458e+06	5.12762e+06	4.41334e+06	8.03442e+06	989854	8.97644e+07	1.35125e+07	1.05457e+07	1.31276e+07	8.31301e+06	1.1372e+06	1.46425e+07	5.50559e+06	9.45804e+06	5.70735e+06	4.71627e+06	3.57578e+06	9.19304e+06	6.80743e+06	2.24292e+07	1.0141e+07	1.26152e+07	6.07907e+06	2.08354e+06	1.80773e+06	4.38834e+06	8.77201e+06	2.3417e+07	1.24327e+07	1.96751e+07	1.01715e+08	3.17389e+07	8.28021e+06	8.03536e+06	1.33995e+07	1.2285e+07	1.02062e+07	7.554e+06	8.29671e+06	7.24436e+06	1.42662e+07	9.1525e+06	1.55939e+07
	P04083	ANXA1_HUMAN	Annexin A1 (Annexin I) (Annexin-1) (Calpactin II) (Calpactin-2) (Chromobindin-9) (Lipocortin I) (Phospholipase A2 inhibitory protein) (p35)	0	0	1.61759e+06	0	284482	0	1.20482e+06	0	0	0	0	0	1.40414e+06	0	0	1.00965e+06	0	0	0	0	1.34453e+06	867277	0	9.08578e+06	0	0	0	0	0	0	2.32859e+06	0	2.21101e+06	0	0	0	0	0	0	0	0	0	0	0	0	0
	P12429	ANXA3_HUMAN	Annexin A3 (35-alpha calcimedin) (Annexin III) (Annexin-3) (Inositol 1,2-cyclic phosphate 2-phosphohydrolase) (Lipocortin III) (Placental anticoagulant protein III) (PAP-III)	302487	0	570404	864470	0	143658	1.04399e+06	0	0	0	0	0	1.1301e+06	0	0	593187	0	0	0	0	1.44335e+06	704412	0	5.55819e+06	0	0	0	0	0	0	3.18718e+06	0	2.86386e+06	0	0	0	0	0	0	0	0	0	0	0	0	0
	P08758	ANXA5_HUMAN	Annexin A5 (Anchorin CII) (Annexin V) (Annexin-5) (Calphobindin I) (CBP-I) (Endonexin II) (Lipocortin V) (Placental anticoagulant protein 4) (PP4) (Placental anticoagulant protein I) (PAP-I) (Thromboplastin inhibitor) (Vascular anticoagulant-alpha) (VAC-alpha)	0	0	524054	0	0	0	381871	0	0	0	0	0	0	0	0	0	0	0	0	200494	462878	0	0	0	0	0	0	0	0	0	0	0	0	0	0	0	0	0	0	0	0	0	0	0	0	0
	P08133	ANXA6_HUMAN	Annexin A6 (67 kDa calelectrin) (Annexin VI) (Annexin-6) (Calphobindin-II) (CPB-II) (Chromobindin-20) (Lipocortin VI) (Protein III) (p68) (p70)	0	0	0	0	0	0	450048	0	0	0	0	0	0	0	0	0	0	0	0	0	274393	249902	0	1.69704e+06	0	0	0	0	0	0	0	0	0	0	0	0	0	0	0	0	0	0	0	0	0	0
	P03973	SLPI_HUMAN	Antileukoproteinase (ALP) (BLPI) (HUSI-1) (Mucus proteinase inhibitor) (MPI) (Protease inhibitor WAP4) (Secretory leukocyte protease inhibitor) (Seminal proteinase inhibitor) (WAP four-disulfide core domain protein 4)	1.39892e+06	0	0	0	0	0	0	0	0	0	0	0	0	0	0	0	0	776168	280261	663042	0	0	1.76713e+06	0	0	0	0	0	0	0	0	0	2039263	0	0	0	0	0	0	0	0	0	0	0	0	0
	P01008	ANT3_HUMAN	Antithrombin-III (ATIII) (Serpin C1)	7.12845e+06	5.32692e+06	1.43976e+07	9.10513e+06	2.60584e+06	3.31552e+06	6.16629e+06	1.98587e+06	4.68308e+07	1.54235e+07	8.58276e+06	1.80188e+07	9.68297e+06	887308	1.80919e+07	8.552e+06	9.83069e+06	6.30359e+06	2.92042e+06	3.15048e+06	2.85315e+06	3.03661e+06	1.91599e+07	6.66407e+06	3.34795e+06	4.83192e+06	2.23004e+06	1.65853e+06	1.60555e+06	4.85287e+06	2.60503e+07	5.31936e+06	6.56115e+06	4.27227e+07	1.31917e+07	3.2929e+06	2.64609e+06	3.29889e+06	1.14152e+07	1.0034e+07	8.36111e+06	2.73717e+06	4.04436e+06	7.33507e+06	4.76958e+06	5.60316e+06
	P02647	APOA1_HUMAN	Apolipoprotein A-I (Apo-AI) (ApoA-I) (Apolipoprotein A1) [Cleaved into: Proapolipoprotein A-I (ProapoA-I); Truncated apolipoprotein A-I (Apolipoprotein A-I(1-242))]	6.43276e+07	2.3948e+07	1.04135e+08	1.05314e+08	1.05227e+07	3.14867e+07	5.70969e+07	1.86334e+07	3.43113e+08	1.18459e+08	5.40245e+07	2.0866e+08	1.53481e+08	2.61692e+06	1.16324e+08	1.13204e+08	1.32632e+08	5.93451e+07	1.86519e+07	2.47526e+07	6.74981e+07	4.98427e+07	1.22551e+08	5.03027e+07	1.61204e+07	2.07583e+07	2.218e+07	1.47219e+07	1.72893e+07	5.37474e+07	1.14562e+08	9.38666e+07	5.82013e+07	9.50009e+08	4.76038e+08	2.19397e+07	1.49001e+07	1.98551e+07	5.07269e+07	6.22343e+07	4.85607e+07	1.6792e+07	2.34347e+07	5.60112e+07	2.28921e+07	4.33073e+07
	P02652	APOA2_HUMAN	Apolipoprotein A-II (Apo-AII) (ApoA-II) (Apolipoprotein A2) [Cleaved into: Proapolipoprotein A-II (ProapoA-II); Truncated apolipoprotein A-II (Apolipoprotein A-II(1-76))]	2.02505e+07	1.34507e+07	1.97515e+07	3.32213e+07	6.0628e+06	2.09147e+07	2.33473e+07	2.27347e+07	1.24484e+08	6.61938e+07	1.5723e+07	1.62267e+08	5.34159e+07	5.60893e+06	8.14114e+07	6.56493e+07	6.62055e+07	3.1592e+07	1.08746e+07	1.81715e+07	3.92786e+07	3.45347e+07	4.06074e+07	3.9068e+07	9.4922e+06	1.0024e+07	8.62267e+06	4.10109e+06	6.83012e+06	2.1026e+07	3.49773e+07	8.76833e+07	2.05649e+07	2.0357e+08	2.57196e+08	2.41618e+07	1.05691e+07	1.93409e+07	4.26551e+07	2.31821e+07	2.88692e+07	2.07423e+07	1.47019e+07	4.40338e+07	1.66304e+07	2.42464e+07
	P06727	APOA4_HUMAN	Apolipoprotein A-IV (Apo-AIV) (ApoA-IV) (Apolipoprotein A4)	5.64011e+06	6.37694e+06	4.51912e+06	6.9406e+06	1.76464e+06	2.28051e+06	3.49893e+06	730517	2.57632e+07	7.64188e+06	4.69482e+06	4.93538e+07	9.72686e+06	299881	1.30155e+07	1.12382e+07	8.64776e+06	3.59872e+06	1.87436e+06	1.17357e+06	4.10392e+06	5.34328e+06	1.47046e+07	2.94868e+06	3.62049e+06	3.45882e+06	1.44648e+06	2.23415e+06	865459	1.22036e+07	1.41107e+07	5.74822e+06	3.79677e+06	1.37282e+08	4.16858e+07	8.04949e+06	3.35038e+06	4.06067e+06	7.35401e+06	8.67592e+06	7.06262e+06	6.26508e+06	3.6724e+06	1.15316e+07	3.83133e+06	5.60468e+06
	P04114	APOB_HUMAN	Apolipoprotein B-100 (Apo B-100) [Cleaved into: Apolipoprotein B-48 (Apo B-48)]	1.83769e+06	529580	1.60859e+06	2.7482e+06	0	1.42744e+06	2.05729e+06	435251	2.75568e+07	6.28395e+06	2.85497e+06	6.26534e+06	4.0026e+06	0	5.42856e+06	3.62991e+06	4.63789e+06	2.25228e+06	0	1.61e+06	1.83805e+06	1.76289e+06	4.812e+06	2.15625e+06	1.28485e+06	1.27076e+06	517377	648800	412479	533156	4.88795e+06	3.42169e+06	2.94904e+06	2.03483e+07	9.83685e+06	283015	123851	0	739506	1.2523e+06	1.27188e+06	0	0	206038	0	120964
	P02654	APOC1_HUMAN	Apolipoprotein C-I (Apo-CI) (ApoC-I) (Apolipoprotein C1) [Cleaved into: Truncated apolipoprotein C-I]	1.54877e+06	571137	2.20826e+06	7.76198e+06	246163	519938	1.92068e+06	380451	1.33479e+07	2.61725e+06	0	7.66203e+06	6.81257e+06	0	4.95494e+06	4.34199e+06	4.65113e+06	1.80771e+06	458288	802492	3.11712e+06	3.84142e+06	3.622e+06	5.58e+06	0	325500	470249	762417	0	0	2.9014e+06	6.95835e+06	0	7.82214e+07	2.31165e+07	1.62956e+06	732315	1.03493e+06	990484	1.24085e+06	750507	974641	307028	1.27042e+06	385528	1001787
	P02655	APOC2_HUMAN	Apolipoprotein C-II (Apo-CII) (ApoC-II) (Apolipoprotein C2) [Cleaved into: Proapolipoprotein C-II (ProapoC-II)]	7.97119e+06	2.58437e+06	5.62467e+06	5.8353e+06	632260	995796	3.86986e+06	0	5.44857e+07	0	2.95705e+06	3.55718e+07	1.22046e+07	0	8.44805e+06	7.50841e+06	2.11582e+07	2.48166e+06	1.4315e+06	2.51396e+06	3.56003e+06	0	1.01354e+07	5.21324e+06	1.52153e+06	1.58669e+06	751664	997499	770231	4.06929e+06	1.93168e+07	1.57706e+07	8.78046e+06	1.83822e+08	5.38556e+07	2.36587e+06	1.59983e+06	1.82817e+06	4.40043e+06	6.98354e+06	3.57505e+06	2.04112e+06	1.41949e+06	0	0	2.90609e+06
	P02656	APOC3_HUMAN	Apolipoprotein C-III (Apo-CIII) (ApoC-III) (Apolipoprotein C3)	7.22198e+06	2.87754e+06	9.65324e+06	1.32603e+07	334802	1.5459e+06	6.3001e+06	651201	8.81339e+07	1.25555e+07	1.37775e+07	3.49679e+07	30324456	65888.3	3.94742e+07	1.80388e+07	2.92881e+07	3.60221e+06	1.07813e+06	2.52431e+06	7.1036e+06	4.36319e+06	2.5192e+07	1.57305e+07	1.57773e+06	5.10428e+06	601862	2.07132e+06	611690	3.01853e+06	2.34071e+07	2.40864e+07	5.44048e+06	4.04984e+08	1.30364e+08	3.16481e+06	2.18483e+06	3.00914e+06	6.261e+06	9.39953e+06	3.855e+06	3.96905e+06	1.58095e+06	4.81337e+06	1423501	4.16402e+06
	P55056	APOC4_HUMAN	Apolipoprotein C-IV (Apo-CIV) (ApoC-IV) (Apolipoprotein C4)	0	0	0	0	0	0	0	0	0	0	0	0	0	0	0	0	0	0	0	0	0	0	0	0	0	0	0	0	0	0	0	0	0	1.54542e+07	0	0	0	0	0	0	0	0	0	0	0	0
	P05090	APOD_HUMAN	Apolipoprotein D (Apo-D) (ApoD)	7.4703e+07	6.6794e+07	7.97931e+06	1.33771e+07	2.06293e+07	9.83629e+06	9.73066e+06	5.59919e+06	1.09755e+08	9.1417e+07	4.54859e+07	7.04465e+07	3.37549e+07	1.14359e+06	2.41637e+07	2.16516e+07	2.8256e+07	2.07351e+07	5.95015e+07	7.31887e+06	1.42214e+07	7.89809e+06	9.21628e+07	1.29228e+07	3.3361e+07	1.60382e+07	2.76744e+06	2.92377e+06	1.6393e+07	1.93415e+07	1.60464e+08	2.58833e+07	1.8138e+08	1.25915e+08	9.44374e+07	9.3603e+07	3.96893e+07	5.66608e+07	6.48031e+07	5.31523e+07	4.0632e+07	9.04534e+07	2.95388e+07	5.472e+07	3.00287e+07	4.07688e+07
	P02649	APOE_HUMAN	Apolipoprotein E (Apo-E)	2.33649e+07	8.62663e+07	1.08927e+07	1.0949e+07	2.83794e+07	5.45445e+06	7.95109e+06	1.31334e+06	5.32271e+07	5.31945e+07	1.50771e+07	2.38706e+07	1.08333e+07	585890	7.75735e+06	9.39157e+06	1.56292e+07	6.54387e+06	1.78858e+07	3.88264e+06	1.03275e+07	5.43468e+06	2.49117e+07	9.18881e+06	6.17315e+07	9.83346e+06	1.89651e+06	1.2866e+06	8.10933e+06	9.95312e+06	4.39719e+07	1.25617e+07	5.12978e+07	8.65812e+07	2.93366e+07	4.70088e+07	3.26643e+07	5.78405e+07	5.79262e+07	4.5547e+07	2.60099e+07	6.28225e+07	3.29088e+07	7.08818e+07	6.45144e+07	6.25532e+07
	Q13790	APOF_HUMAN	Apolipoprotein F (Apo-F) (Lipid transfer inhibitor protein) (LTIP)	0	0	0	0	0	0	0	0	4.4802e+06	0	0	1.18491e+06	2263370	0	1.3277e+06	1.03986e+06	1.25098e+06	684082	0	519934	0	535013	0	0	0	0	0	0	0	0	0	0	0	0	0	0	0	0	0	0	0	92552.5	0	0	0	0
	O14791	APOL1_HUMAN	Apolipoprotein L1 (Apolipoprotein L) (Apo-L) (ApoL) (Apolipoprotein L-I) (ApoL-I)	4.55364e+06	339684	2.11592e+06	1.38966e+06	0	1.14382e+06	2.26423e+06	212533	5.06729e+07	4.71692e+06	1.41465e+06	6292889	4.21563e+06	0	3.8482e+06	4.05446e+06	8.3112e+06	2.22481e+06	244516	1.35377e+06	2.83266e+06	2.65573e+06	1.11826e+07	7.08491e+06	0	803863	641937	345080	647105	0	5.68773e+06	8.76675e+06	2.68514e+06	9.0271e+07	2.71864e+07	668066	390973	722426	2.03301e+06	0	1.49793e+06	395662	522738	1.25032e+06	477288	1.20164e+06
	O95445	APOM_HUMAN	Apolipoprotein M (Apo-M) (ApoM) (Protein G3a)	2.3845e+06	0	2.40609e+06	4.31884e+06	0	0	3494738	0	1.04042e+07	4.71427e+06	0	9.09768e+06	4.92979e+06	0	2.70615e+06	1.47336e+06	2.60286e+06	2.95468e+06	0	2.05573e+06	2.94074e+06	3.1498e+06	0	777255	0	0	1.04283e+06	0	0	3.07552e+06	0	2.55576e+06	0	2.47561e+07	1.78524e+07	0	0	0	0	4.51577e+06	2.55634e+06	0	0	0	0	0
	P08519	APOA_HUMAN	Apolipoprotein(a) (Apo(a)) (Lp(a)) (EC 3.4.21.-)	1.0892e+06	428355	0	0	0	1.28589e+06	3.14441e+06	209632	0	4.93843e+06	617673	3.91674e+06	0	0	700342	3.51333e+06	4.3692e+06	3.98583e+06	0	179098	1.99764e+06	306785	2.78198e+06	3.05906e+06	0	0	0	165515	0	0	8.65739e+06	1.18116e+06	0	0	6.12926e+06	0	0	0	0	0	0	0	0	0	0	0
	Q9ULZ3	ASC_HUMAN	Apoptosis-associated speck-like protein containing a CARD (hASC) (Caspase recruitment domain-containing protein 5) (PYD and CARD domain-containing protein) (Target of methylation-induced silencing 1)	0	0	0	0	0	0	0	0	0	0	0	0	0	0	0	0	0	0	0	0	426814	0	0	1.44772e+06	0	0	0	0	0	0	1.87438e+06	0	0	0	0	0	0	0	0	0	0	0	0	0	0	0
	P05089	ARGI1_HUMAN	Arginase-1 (EC 3.5.3.1) (Liver-type arginase) (Type I arginase)	0	0	0	0	242442	0	0	0	0	0	0	0	0	0	0	0	0	0	0	0	0	0	0	2.01953e+06	0	0	0	0	0	0	0	0	0	0	0	0	0	0	0	0	0	0	0	0	0	0
	P17174	AATC_HUMAN	Aspartate aminotransferase, cytoplasmic (cAspAT) (EC 2.6.1.1) (EC 2.6.1.3) (Cysteine aminotransferase, cytoplasmic) (Cysteine transaminase, cytoplasmic) (cCAT) (Glutamate oxaloacetate transaminase 1) (Transaminase A)	0	1.20326e+06	0	0	543181	0	699244	0	0	711930	457945	0	0	0	0	0	0	0	277134	0	0	0	514447	0	1.70986e+06	0	0	0	0	0	0	0	0	0	0	430459	304147	596461	783929	808660	564239	448066	703051	1.40132e+06	1.03502e+06	734961
	P06576	ATPB_HUMAN	ATP synthase subunit beta, mitochondrial (EC 3.6.3.14)	0	0	0	0	0	0	597880	0	0	0	0	0	0	0	0	0	0	0	0	0	0	0	0	1.18026e+06	0	0	0	0	0	0	0	0	0	0	0	0	0	0	0	0	0	0	0	0	0	0
	O75882	ATRN_HUMAN	Attractin (DPPT-L) (Mahogany homolog)	5.74475e+06	1.49941e+06	776112	360137	284752	404454	785463	0	5.60256e+06	2.29618e+06	1222545	2.43484e+06	1.70939e+06	0	1.279e+06	1.26365e+06	2.16772e+06	903822	363900	461657	1.21755e+06	465322	2.48245e+06	932329	0	509599	241495	0	0	501129	5.81631e+06	1.74658e+06	1.73185e+06	1.63804e+07	3.6241e+06	457467	394433	446795	1.20038e+06	676968	824335	602645	290884	470740	443335	730786
	P20160	CAP7_HUMAN	Azurocidin (Cationic antimicrobial protein CAP37) (Heparin-binding protein) (HBP) (hHBP)	0	0	9.74916e+06	3.11531e+06	3.40143e+06	941465	5.43658e+06	0	1.09723e+07	2.5746e+06	2.42436e+06	2.10509e+07	4.70966e+06	0	0	5.87809e+06	3.26053e+06	0	0	3.75916e+06	0	0	0	0	0	0	280816	0	0	867574	2.87821e+07	0	0	0	0	0	0	0	0	0	0	0	0	0	0	0
	P17213	BPI_HUMAN	Bactericidal permeability-increasing protein (BPI) (CAP 57)	0	0	0	0	0	0	1.32927e+06	0	0	0	0	0	0	0	0	0	0	0	0	0	885089	734654	0	4.28304e+06	0	0	0	0	0	0	0	0	0	0	0	0	0	0	0	0	0	0	0	0	0	0
	P02730	B3AT_HUMAN	Band 3 anion transport protein (Anion exchange protein 1) (AE 1) (Anion exchanger 1) (Solute carrier family 4 member 1) (CD antigen CD233)	0	0	3.37898e+06	0	0	0	0	0	0	0	0	0	0	0	0	0	0	0	0	0	0	0	0	0	0	0	0	0	0	0	0	0	0	0	0	0	0	0	0	0	0	0	0	0	0	0
	P98160	PGBM_HUMAN	Basement membrane-specific heparan sulfate proteoglycan core protein (HSPG) (Perlecan) (PLC) [Cleaved into: Endorepellin; LG3 peptide]	1.13593e+06	1.22652e+06	168643	0	399143	0	0	0	0	973008	375098	601598	317529	0	317805	104405	447083	208425	465789	263715	584029	0	1.42448e+06	4.45996e+06	536291	510889	0	0	204139	985462	3.77953e+06	352477	2.86365e+06	1.20012e+06	692054	555729	508817	691993	1.12863e+06	570877	404352	705530	380702	646257	433481	735508
	P15291	B4GT1_HUMAN	Beta-1,4-galactosyltransferase 1 (Beta-1,4-GalTase 1) (Beta4Gal-T1) (b4Gal-T1) (EC 2.4.1.-) (UDP-Gal:beta-GlcNAc beta-1,4-galactosyltransferase 1) (UDP-galactose:beta-N-acetylglucosamine beta-1,4-galactosyltransferase 1) [Cleaved into: Processed beta-1,4-galactosyltransferase 1] [Includes: Lactose synthase A protein (EC 2.4.1.22); N-acetyllactosamine synthase (EC 2.4.1.90) (Nal synthase); Beta-N-…	650720	0	0	0	0	0	0	0	0	0	0	0	0	0	0	0	0	0	0	0	0	0	0	0	0	0	0	0	0	0	1.18839e+06	0	1.13903e+06	0	0	0	0	0	0	0	0	0	0	0	0	0
	O43505	B4GA1_HUMAN	Beta-1,4-glucuronyltransferase 1 (EC 2.4.1.-) (I-beta-1,3-N-acetylglucosaminyltransferase) (iGnT) (N-acetyllactosaminide beta-1,3-N-acetylglucosaminyltransferase) (Poly-N-acetyllactosamine extension enzyme) (UDP-GlcNAc:betaGal beta-1,3-N-acetylglucosaminyltransferase 1)	4.76301e+06	8.95782e+06	1.31271e+06	1.49962e+06	2.74732e+06	1.00894e+06	1.8822e+06	429088	2.64733e+06	5.32367e+06	3.4958e+06	1.57251e+06	2.08515e+06	321704	1.18255e+06	1.08863e+06	1.90867e+06	1.15327e+06	2.44523e+06	890880	3.51134e+06	972299	4.17773e+06	2.50009e+06	1.39717e+07	1.60631e+06	502290	0	1.30475e+06	2.58914e+06	3.01451e+06	2.00613e+06	8.86892e+06	8.0341e+06	2.37928e+06	7.67138e+06	6.48469e+06	8.37296e+06	8.82122e+06	6.69092e+06	5.19338e+06	7.53009e+06	4.05068e+06	1.10145e+07	7.95686e+06	8.60335e+06
	P02749	APOH_HUMAN	Beta-2-glycoprotein 1 (APC inhibitor) (Activated protein C-binding protein) (Anticardiolipin cofactor) (Apolipoprotein H) (Apo-H) (Beta-2-glycoprotein I) (B2GPI) (Beta(2)GPI)	2.10015e+07	6.63312e+06	1.33043e+07	7.51644e+06	3.20035e+06	4.86473e+06	8.8233e+06	1.74687e+06	4.27867e+07	1.71846e+07	1.06837e+07	2.31016e+07	1.69376e+07	636738	2.39046e+07	1.64313e+07	1.67617e+07	9.3753e+06	3.54977e+06	6.4095e+06	1.25344e+07	1.0345e+07	3.93722e+07	4.47381e+06	3.53456e+06	5.96825e+06	3.13296e+06	3.15087e+06	2.86689e+06	7.57292e+06	2.76258e+07	2.1076e+07	1.68189e+07	1.72526e+08	6.4457e+07	7.88294e+06	7.80683e+06	6.99926e+06	9.77639e+06	8.73289e+06	4.28021e+06	6.5644e+06	3.64801e+06	9.49137e+06	3.2299e+06	5.38713e+06
	P61769	B2MG_HUMAN	Beta-2-microglobulin [Cleaved into: Beta-2-microglobulin form pI 5.3]	6.18572e+07	1.26044e+07	0	0	8.63229e+06	6.83597e+06	3.80636e+06	0	1.0666e+07	1.87164e+07	4.6412e+06	1.05753e+07	4.08049e+06	1.29024e+06	5.64358e+06	3.52662e+06	5319835	4.99439e+06	3.92561e+06	3.19065e+06	5.60751e+06	3.64734e+06	3.21695e+07	0	1.31698e+07	0	0	0	2.87017e+06	1.50444e+07	4.578e+07	6.44368e+06	4.1683e+07	4.92384e+07	2.17397e+07	1.88444e+07	1.36209e+07	1.72216e+07	1.43998e+07	7.77029e+06	5.36451e+06	1.39337e+07	5.20244e+06	7.55564e+06	4.05847e+06	4.92196e+06
	Q562R1	ACTBL_HUMAN	Beta-actin-like protein 2 (Kappa-actin)	1.3284e+07	0	8.96384e+06	9.51383e+06	1.51767e+06	2.11396e+06	1.13865e+07	405322	1.46684e+07	6.59938e+06	1.99481e+06	5.99345e+06	1.33329e+07	751681	2.3669e+06	6.34651e+06	3.5041e+06	1.54309e+06	1.77478e+06	1.58355e+06	1.16792e+07	9.43372e+06	3.81566e+07	8.21962e+07	0	929690	1.56572e+06	217558	465792	6.83189e+06	5.63086e+07	4.15317e+06	2.77732e+07	1.51915e+07	8.00399e+06	0	165560	0	832383	0	888042	0	0	0	0	0
	Q96KN2	CNDP1_HUMAN	Beta-Ala-His dipeptidase (EC 3.4.13.20) (CNDP dipeptidase 1) (Carnosine dipeptidase 1) (Glutamate carboxypeptidase-like protein 2) (Serum carnosinase)	3.75039e+06	7.2031e+06	2.48874e+06	1.46814e+06	955551	1.11496e+06	2.59081e+06	163204	6.52232e+06	5.36899e+06	3.0502e+06	1.57773e+06	2.54855e+06	530312	2.99118e+06	1.59753e+06	2.77965e+06	1.63106e+06	2.52344e+06	862854	2.37468e+06	728032	4.81269e+06	1.92866e+06	9.65899e+06	1.24877e+06	442262	201826	764830	0	2.7836e+06	3.93629e+06	7.63855e+06	2.34562e+07	6.47277e+06	5.44908e+06	4.42866e+06	6.48875e+06	7.11522e+06	4.16566e+06	4.61282e+06	5.32603e+06	2.89455e+06	8.41955e+06	4.7262e+06	3.81044e+06
	Q96JF0	SIAT2_HUMAN	Beta-galactoside alpha-2,6-sialyltransferase 2 (Alpha 2,6-ST 2) (EC 2.4.99.1) (CMP-N-acetylneuraminate-beta-galactosamide-alpha-2,6-sialyltransferase 2) (ST6Gal II) (ST6GalII) (hST6Gal II) (Sialyltransferase 2)	0	0	0	0	0	0	0	0	0	0	0	0	0	0	0	0	0	0	0	0	0	0	0	0	0	0	0	0	0	0	0	0	0	0	0	0	0	0	0	0	0	0	0	0	0	0
	P06865	HEXA_HUMAN	Beta-hexosaminidase subunit alpha (EC 3.2.1.52) (Beta-N-acetylhexosaminidase subunit alpha) (Hexosaminidase subunit A) (N-acetyl-beta-glucosaminidase subunit alpha)	0	0	0	0	0	0	0	0	0	0	0	0	0	0	0	0	0	0	163764	0	0	0	0	0	0	0	0	0	0	0	0	0	0	0	0	195841	0	388747	0	0	0	250985	0	0	389153	0
	P07686	HEXB_HUMAN	Beta-hexosaminidase subunit beta (EC 3.2.1.52) (Beta-N-acetylhexosaminidase subunit beta) (Hexosaminidase subunit B) (Cervical cancer proto-oncogene 7 protein) (HCC-7) (N-acetyl-beta-glucosaminidase subunit beta) [Cleaved into: Beta-hexosaminidase subunit beta chain B; Beta-hexosaminidase subunit beta chain A]	0	0	0	0	0	0	0	0	0	0	0	0	0	0	0	0	0	0	0	0	0	0	0	0	0	0	0	0	0	0	0	0	0	0	0	0	0	601383	0	0	0	126673	0	0	0	0
	P43251	BTD_HUMAN	Biotinidase (Biotinase) (EC 3.5.1.12)	1376264	1.00535e+06	1.43894e+06	661439	398721	356721	712275	0	5.40135e+06	1.23045e+06	1.41559e+06	1.4038e+06	1.18371e+06	237896	1.13296e+06	1.18482e+06	1.31688e+06	799755	615109	283164	808329	1.1849e+06	2.01707e+06	0	1.56452e+06	646451	427028	167410	323986	716771	1.70717e+06	2.92666e+06	1.87651e+06	8.49749e+06	5.23555e+06	1.16859e+06	1.00843e+06	1.4753e+06	1.76528e+06	1.187e+06	580785	1.19179e+06	643834	1.42365e+06	1.30601e+06	1.48607e+06
	P07738	PMGE_HUMAN	Bisphosphoglycerate mutase (BPGM) (EC 5.4.2.4) (2,3-bisphosphoglycerate mutase, erythrocyte) (2,3-bisphosphoglycerate synthase) (EC 3.1.3.13) (EC 5.4.2.11) (2,3-diphosphoglycerate mutase) (DPGM) (BPG-dependent PGAM)	0	0	0	0	0	0	0	0	0	0	0	0	0	0	0	0	0	0	0	0	0	0	0	0	0	0	0	0	0	0	0	0	0	0	0	0	0	0	0	0	0	0	0	0	0	0
	P80723	BASP1_HUMAN	Brain acid soluble protein 1 (22 kDa neuronal tissue-enriched acidic protein) (Neuronal axonal membrane protein NAP-22)	3.26563e+06	621943	1.28213e+06	621648	1.85937e+06	261173	1.73698e+06	126497	2.36912e+06	0	0	1.72246e+06	913002	0	332288	542923	332040	151075	251628	331834	1.02413e+06	730319	4.11792e+06	5.38292e+06	924709	144973	205952	0	161698	777895	8.40567e+06	814786	1.31282e+07	4.04871e+06	1.27248e+06	596715	522683	693116	466967	262098	283886	486420	303612	653125	466266	681327
	Q96GW7	PGCB_HUMAN	Brevican core protein (Brain-enriched hyaluronan-binding protein) (BEHAB) (Chondroitin sulfate proteoglycan 7)	2.29796e+06	7.65739e+06	531178	0	2.93195e+06	693061	793776	0	0	0	954056	0	734139	1.06162e+06	324312	660576	1.60896e+06	843762	1.5138e+06	390077	1.62271e+06	0	1.79946e+06	767056	5.31689e+06	640320	477820	0	705406	2.3069e+06	0	1.15417e+06	5.91406e+06	2.89351e+06	0	5.58103e+06	4.78908e+06	5.96973e+06	7.46388e+06	4.22906e+06	4.16096e+06	5.68766e+06	2.7212e+06	4.76944e+06	4.43172e+06	5.47119e+06
	Q96CX2	KCD12_HUMAN	BTB/POZ domain-containing protein KCTD12 (Pfetin) (Predominantly fetal expressed T1 domain)	0	0	0	0	0	0	0	0	0	0	0	0	0	0	0	0	0	0	0	0	0	0	6.09963e+06	0	0	0	0	0	0	0	0	0	0	0	0	0	0	0	0	0	0	0	0	0	0	0
	P02741	CRP_HUMAN	C-reactive protein [Cleaved into: C-reactive protein(1-205)]	3.25031e+06	3.15221e+06	3.35101e+06	0	4.79419e+06	9.00862e+06	3.92989e+06	4.23101e+06	2.29735e+08	4.06761e+07	3.89555e+07	1.86457e+06	3.89844e+07	942960	853727	2.71337e+06	3.42855e+07	2.77345e+07	4.91182e+06	8.46023e+06	1.13883e+06	491165	4.88077e+06	0	0	8.68898e+06	3.40793e+06	2.9046e+06	9.82198e+06	8.99703e+06	7.9315e+07	2.93994e+06	6.48207e+06	3.02969e+07	4.86903e+06	0	0	0	0	683809	0	1.1501e+06	0	0	0	759016
	Q9Y240	CLC11_HUMAN	C-type lectin domain family 11 member A (C-type lectin superfamily member 3) (Lymphocyte secreted C-type lectin) (Stem cell growth factor) (p47)	0	0	0	0	0	0	0	0	0	0	0	0	0	0	0	0	0	0	0	0	0	0	0	0	0	0	0	0	0	0	0	0	0	0	0	410532	337970	530228	395054	0	0	0	0	0	0	0
	P23582	ANFC_HUMAN	C-type natriuretic peptide [Cleaved into: CNP-22; CNP-29; CNP-53]	0	0	0	0	0	0	0	0	0	0	0	0	0	0	0	0	0	0	0	0	0	0	0	0	1.25777e+06	0	0	0	0	0	0	0	0	0	0	779652	710381	1.11393e+06	0	0	0	633180	0	1.30325e+06	0	1.18925e+06
	P02778	CXL10_HUMAN	C-X-C motif chemokine 10 (10 kDa interferon gamma-induced protein) (Gamma-IP10) (IP-10) (Small-inducible cytokine B10) [Cleaved into: CXCL10(1-73)]	8.09478e+06	0	0	821629	0	2.50531e+06	1.09196e+06	0	3.38901e+06	2.63796e+06	0	1.12875e+06	1.91955e+06	0	0	970421	8.27051e+06	0	0	0	3.10392e+06	2.53101e+06	1.37233e+07	0	0	0	0	0	1.08161e+06	1.76477e+06	0	0	1.85392e+06	5.98219e+06	0	0	0	0	0	0	0	0	0	0	0	0
	P04003	C4BPA_HUMAN	C4b-binding protein alpha chain (C4bp) (Proline-rich protein) (PRP)	4.01824e+06	1.40667e+06	2.50222e+06	3.26351e+06	0	2.25808e+06	2.73062e+06	754075	4.75787e+07	1.11245e+07	5.27817e+06	1.11006e+07	1.0309e+07	0	8.14477e+06	5.17253e+06	1.46656e+07	4.72139e+06	0	2.43281e+06	4.87804e+06	5.11952e+06	1.47107e+07	3.75979e+06	0	2.3307e+06	1.04658e+06	1.22824e+06	844370	1.75913e+06	5.94837e+06	1.35136e+07	6.26185e+06	8.95487e+07	2.96137e+07	727629	343450	336240	1.47782e+06	1.44707e+06	1.64648e+06	311961	0	0	0	0
	P20851	C4BPB_HUMAN	C4b-binding protein beta chain	0	0	0	0	0	0	0	0	5464787	0	1.20551e+06	6.77899e+06	2.22502e+06	0	1.5399e+06	1.43409e+06	2.93342e+06	1.26272e+06	0	653443	1.1257e+06	789242	2.0124e+06	0	0	0	0	0	0	0	0	1.47475e+06	0	2.06143e+07	5.39973e+06	0	0	0	0	0	0	0	0	0	0	0
	Q9HCU4	CELR2_HUMAN	Cadherin EGF LAG seven-pass G-type receptor 2 (Cadherin family member 10) (Epidermal growth factor-like protein 2) (EGF-like protein 2) (Flamingo homolog 3) (Multiple epidermal growth factor-like domains protein 3) (Multiple EGF-like domains protein 3)	0	0	0	0	0	0	0	0	0	0	0	0	0	0	0	0	0	0	0	0	0	0	0	0	0	0	0	0	0	0	0	0	0	0	0	561034	0	766071	0	0	0	0	0	0	0	522594
	P55290	CAD13_HUMAN	Cadherin-13 (Heart cadherin) (H-cadherin) (P105) (Truncated cadherin) (T-cad) (T-cadherin)	3.26691e+06	2.14065e+06	0	0	610107	0	0	0	0	0	0	0	0	0	0	0	0	0	768647	0	1.63037e+06	374842	3.62374e+06	348366	3.91915e+06	0	0	0	479333	2.64773e+06	0	0	5.42596e+06	1.03707e+07	0	1.77312e+06	1.55054e+06	2.15671e+06	2.03222e+06	2.34864e+06	0	1.11185e+06	1430945	3.25208e+06	2.1749e+06	2.66897e+06
	P55291	CAD15_HUMAN	Cadherin-15 (Cadherin-14) (Muscle cadherin) (M-cadherin)	0	0	0	0	0	0	0	0	0	0	0	0	0	0	0	0	0	0	0	0	0	0	0	0	0	0	0	0	0	0	0	0	0	0	0	179162	176468	212890	0	0	0	0	0	0	337180	409509
	P19022	CADH2_HUMAN	Cadherin-2 (CDw325) (Neural cadherin) (N-cadherin) (CD antigen CD325)	807702	1.38344e+06	0	0	459896	0	0	0	0	1.2837e+06	959330	0	0	0	0	0	0	0	362619	0	673495	0	0	0	2.25114e+06	0	0	0	0	694436	0	0	2.34688e+06	0	0	732521	895894	981707	1.40145e+06	939226	582838	722883	661539	1.64492e+06	1.23034e+06	1.31743e+06
	P55283	CADH4_HUMAN	Cadherin-4 (Retinal cadherin) (R-CAD) (R-cadherin)	0	0	0	0	0	0	0	0	0	0	0	0	0	0	0	0	0	0	0	0	0	0	0	0	0	0	0	0	0	0	0	0	0	0	0	0	0	0	0	0	0	0	0	0	0	0
	P33151	CADH5_HUMAN	Cadherin-5 (7B4 antigen) (Vascular endothelial cadherin) (VE-cadherin) (CD antigen CD144)	0	0	0	0	0	0	0	0	0	0	0	0	0	0	0	0	0	0	0	0	0	0	0	0	0	0	0	0	0	0	0	0	0	0	0	0	0	0	0	0	0	0	0	0	0	0
	P55285	CADH6_HUMAN	Cadherin-6 (Kidney cadherin) (K-cadherin)	0	0	0	0	0	0	0	0	0	0	0	0	0	0	0	0	0	0	0	0	0	0	0	0	0	0	0	0	0	0	0	0	0	0	0	0	0	531543	0	0	0	0	0	0	0	0
	Q9UQM7	KCC2A_HUMAN	Calcium/calmodulin-dependent protein kinase type II subunit alpha (CaM kinase II subunit alpha) (CaMK-II subunit alpha) (EC 2.7.11.17)	0	0	0	0	0	0	0	0	0	0	0	0	0	0	0	0	0	0	0	0	0	0	0	0	0	0	0	0	0	0	0	0	0	0	0	0	0	0	0	0	0	0	0	0	0	0
	P62158	CALM_HUMAN	Calmodulin (CaM)	2.19565e+06	497171	1.34611e+06	0	1.70837e+06	0	2.5822e+06	0	0	0	0	0	1.48336e+06	338993	0	0	0	0	0	1.21653e+06	2.45017e+06	2.57173e+06	7.7455e+06	8511837	778629	0	0	0	308030	0	4.54586e+06	0	8.23859e+06	0	0	316010	312159	495678	0	0	0	516678	0	0	0	0
	P27824	CALX_HUMAN	Calnexin (IP90) (Major histocompatibility complex class I antigen-binding protein p88) (p90)	0	0	0	0	0	0	0	0	0	0	0	0	0	0	0	0	0	0	0	0	0	0	0	1.30383e+06	0	0	0	0	0	0	0	0	0	0	0	0	0	0	0	0	0	0	0	0	0	0
	P07384	CAN1_HUMAN	Calpain-1 catalytic subunit (EC 3.4.22.52) (Calcium-activated neutral proteinase 1) (CANP 1) (Calpain mu-type) (Calpain-1 large subunit) (Cell proliferation-inducing gene 30 protein) (Micromolar-calpain) (muCANP)	651245	0	716003	0	0	0	0	0	0	0	0	0	0	0	0	0	0	0	0	0	0	0	0	0	0	0	0	0	0	0	2.23705e+06	0	2.40481e+06	0	0	0	0	0	0	0	0	0	0	0	0	0
	P27797	CALR_HUMAN	Calreticulin (CRP55) (Calregulin) (Endoplasmic reticulum resident protein 60) (ERp60) (HACBP) (grp60)	1.06227e+06	923528	1.23018e+06	0	471948	0	585416	0	0	0	0	0	0	0	0	0	0	0	324475	146626	786157	995119	1.69845e+06	2.15904e+06	836204	0	0	0	234776	0	2.39395e+06	0	3.10349e+06	0	0	657746	635710	771081	1.27086e+06	851561	710442	832596	462074	975450	692157	791353
	O94985	CSTN1_HUMAN	Calsyntenin-1 (Alcadein-alpha) (Alc-alpha) (Alzheimer-related cadherin-like protein) (Non-classical cadherin XB31alpha) [Cleaved into: Soluble Alc-alpha (SAlc-alpha); CTF1-alpha (C-terminal fragment 1-alpha)]	3.11312e+06	5.3411e+06	863909	0	1.22813e+06	325689	618195	0	1.05259e+07	1.72727e+06	1.25121e+06	0	434264	0	435393	429229	734998	533192	1.32734e+06	294448	1.74993e+06	505186	2.12116e+06	714203	4.94586e+06	471575	0	0	563533	985442	0	1.94523e+06	3.85487e+06	6.24291e+06	0	3.9845e+06	2.83455e+06	6.55656e+06	4.3121e+06	2.89493e+06	2.25388e+06	4.70667e+06	1.78791e+06	4.44708e+06	3.30592e+06	3.79507e+06
	Q9BQT9	CSTN3_HUMAN	Calsyntenin-3 (Alcadein-beta) (Alc-beta)	0	0	0	0	0	0	0	0	0	0	0	0	0	0	0	0	0	0	0	0	0	0	0	0	916264	0	0	0	0	0	0	0	0	0	0	1723338	1.40829e+06	3.32146e+06	1.68022e+06	0	0	1.19129e+06	710272	0	0	1.39303e+06
	P00915	CAH1_HUMAN	Carbonic anhydrase 1 (EC 4.2.1.1) (Carbonate dehydratase I) (Carbonic anhydrase B) (CAB) (Carbonic anhydrase I) (CA-I)	0	0	1.44365e+07	0	0	0	254887	0	0	6.9967e+06	2.94884e+06	0	647882	316188	1.68988e+06	0	0	0	0	408466	250123	412126	0	0	0	378269	451542	260006	0	0	1.97234e+06	0	0	0	0	0	0	0	0	514690	0	0	0	0	0	0
	P00918	CAH2_HUMAN	Carbonic anhydrase 2 (EC 4.2.1.1) (Carbonate dehydratase II) (Carbonic anhydrase C) (CAC) (Carbonic anhydrase II) (CA-II)	0	0	2494108	0	0	0	3.71685e+06	0	0	2053823	0	0	0	342815	0	0	2.1848e+06	0	0	579392	0	1.21799e+06	0	0	0	0	0	0	0	0	0	0	0	0	0	0	0	0	0	0	0	0	0	0	0	0
	P07451	CAH3_HUMAN	Carbonic anhydrase 3 (EC 4.2.1.1) (Carbonate dehydratase III) (Carbonic anhydrase III) (CA-III)	0	0	0	0	0	0	0	0	0	3.14873e+06	0	0	0	0	0	0	0	0	0	0	0	0	0	0	0	0	0	0	0	0	0	0	0	0	0	0	0	0	0	0	0	0	0	0	0	0
	P16152	CBR1_HUMAN	Carbonyl reductase [NADPH] 1 (EC 1.1.1.184) (15-hydroxyprostaglandin dehydrogenase [NADP(+)]) (EC 1.1.1.197) (NADPH-dependent carbonyl reductase 1) (Prostaglandin 9-ketoreductase) (Prostaglandin-E(2) 9-reductase) (EC 1.1.1.189) (Short chain dehydrogenase/reductase family 21C member 1)	0	0	0	0	0	0	975878	0	0	0	0	0	0	0	0	0	0	0	0	0	0	0	0	0	0	0	0	0	0	0	0	0	0	0	0	0	0	0	0	0	0	0	0	0	0	0
	Q96IY4	CBPB2_HUMAN	Carboxypeptidase B2 (EC 3.4.17.20) (Carboxypeptidase U) (CPU) (Plasma carboxypeptidase B) (pCPB) (Thrombin-activable fibrinolysis inhibitor) (TAFI)	3.06942e+06	831341	1.56382e+06	1.24054e+06	475082	370773	986255	0	1.01378e+07	2213651	1.91852e+06	3.16401e+06	1.94695e+06	0	4.39668e+06	1.64802e+06	2.59343e+06	1.17826e+06	526149	996595	983906	850509	7.95945e+06	765837	543534	944243	181781	290170	0	0	2.72958e+06	0	2.26428e+06	1.32854e+07	6.12571e+06	492297	315774	695383	1.64173e+06	1.64998e+06	1.25615e+06	758651	695216	1.56227e+06	1.02767e+06	1.00412e+06
	P16870	CBPE_HUMAN	Carboxypeptidase E (CPE) (EC 3.4.17.10) (Carboxypeptidase H) (CPH) (Enkephalin convertase) (Prohormone-processing carboxypeptidase)	805171	1.80352e+06	0	0	578351	0	405753	0	0	0	0	0	0	0	572161	544901	543566	274040	751982	255970	898826	946677	0	576576	3.12253e+06	0	0	0	0	0	0	1.26793e+06	849016	3851439	1.81794e+06	2.05111e+06	1.61231e+06	3.84847e+06	3.02387e+06	1.73653e+06	1.64463e+06	2.47275e+06	1.15486e+06	2.2384e+06	2.51288e+06	2.31969e+06
	P15169	CBPN_HUMAN	Carboxypeptidase N catalytic chain (CPN) (EC 3.4.17.3) (Anaphylatoxin inactivator) (Arginine carboxypeptidase) (Carboxypeptidase N polypeptide 1) (Carboxypeptidase N small subunit) (Kininase-1) (Lysine carboxypeptidase) (Plasma carboxypeptidase B) (Serum carboxypeptidase N) (SCPN)	991292	0	0	0	0	971175	938832	141791	1.72621e+07	2.95365e+06	1.23024e+06	2.65718e+06	1.78931e+06	0	1.21203e+06	904509	2.6508e+06	1.48043e+06	0	1.11901e+06	1.56075e+06	1.27167e+06	3826191	0	0	1.57088e+06	148982	517153	0	961813	2.5633e+06	3.51756e+06	2.47734e+06	1.70086e+07	7.24069e+06	0	0	0	0	0	267965	0	0	0	0	0
	P22792	CPN2_HUMAN	Carboxypeptidase N subunit 2 (Carboxypeptidase N 83 kDa chain) (Carboxypeptidase N large subunit) (Carboxypeptidase N polypeptide 2) (Carboxypeptidase N regulatory subunit)	1.15289e+06	0	1.26882e+06	1.73226e+06	0	954583	1.26113e+06	0	1.32809e+07	4.21018e+06	3.52256e+06	3.07067e+06	2.80494e+06	0	2.79544e+06	1.50323e+06	3.13071e+06	1.67033e+06	0	1.2091e+06	2.02287e+06	1.91451e+06	4.64522e+06	1.00378e+06	0	1.38045e+06	622361	337023	243430	1.49496e+06	3.53244e+06	3.47282e+06	2.61431e+06	2.42744e+07	4.46888e+06	284643	218894	365356	501984	0	0	262169	0	0	0	173050
	Q9Y646	CBPQ_HUMAN	Carboxypeptidase Q (EC 3.4.17.-) (Lysosomal dipeptidase) (Plasma glutamate carboxypeptidase)	0	549304	0	0	0	0	0	0	0	0	0	0	0	0	0	0	0	0	0	0	0	0	0	0	953519	0	0	0	0	0	0	0	0	0	0	496849	530097	1.05303e+06	0	0	0	518284	258690	787053	653258	888432
	P40199	CEAM6_HUMAN	Carcinoembryonic antigen-related cell adhesion molecule 6 (Non-specific crossreacting antigen) (Normal cross-reacting antigen) (CD antigen CD66c)	0	0	246034	0	0	0	0	0	0	0	0	0	0	0	0	0	0	0	0	0	0	0	0	0	0	0	0	0	0	0	0	0	0	0	0	0	0	0	0	0	0	0	0	0	0	0
	P31997	CEAM8_HUMAN	Carcinoembryonic antigen-related cell adhesion molecule 8 (CD67 antigen) (Carcinoembryonic antigen CGM6) (Non-specific cross-reacting antigen NCA-95) (CD antigen CD66b)	0	0	0	0	0	0	0	0	0	0	0	0	0	0	0	0	0	0	0	0	0	0	0	0	0	0	0	0	0	0	3.55912e+06	0	0	0	0	0	0	0	0	0	0	0	0	0	0	0
	Q9NQ79	CRAC1_HUMAN	Cartilage acidic protein 1 (68 kDa chondrocyte-expressed protein) (CEP-68) (ASPIC)	1.87572e+06	2.8473e+06	0	0	936055	422845	507306	0	3.90127e+06	2.13336e+06	1.10037e+06	0	1.74923e+06	0	0	0	0	655920	688185	0	1.16478e+06	0	938748	0	3.58784e+06	482407	0	0	470592	970830	0	678373	2.96668e+06	4.3426e+06	0	1.71648e+06	1.53837e+06	2.32446e+06	2.35652e+06	1.96443e+06	1.45519e+06	1.65646e+06	1.0434e+06	3.21602e+06	1.81594e+06	2.6828e+06
	P49747	COMP_HUMAN	Cartilage oligomeric matrix protein (COMP) (Thrombospondin-5) (TSP5)	0	0	0	0	0	0	0	0	0	209313	153311	0	0	0	0	0	0	0	0	0	0	0	0	0	0	142170	0	0	0	0	591977	0	0	2.16186e+06	0	0	0	0	0	0	0	0	0	0	0	0
	P04040	CATA_HUMAN	Catalase (EC 1.11.1.6)	1.60179e+06	0	2.83388e+06	0	1.07231e+06	0	1.20164e+06	0	0	1.08056e+06	1.23357e+06	1.423e+06	1.12968e+06	0	135615	623786	0	0	0	0	1.02778e+06	677168	1.12092e+06	2.6911e+06	0	411299	231028	0	0	0	8.88445e+06	0	4.70559e+06	0	1.00371e+06	0	0	0	0	0	0	0	0	0	0	0
	P49913	CAMP_HUMAN	Cathelicidin antimicrobial peptide (18 kDa cationic antimicrobial protein) (CAP-18) (hCAP-18) [Cleaved into: Antibacterial peptide FALL-39 (FALL-39 peptide antibiotic); Antibacterial peptide LL-37]	1.26322e+06	0	545392	2.2705e+06	1.62081e+06	459547	5.61641e+06	815809	5.60941e+06	327327	784337	6.42621e+06	4.55402e+06	0	619186	2.78725e+06	4.07582e+06	666712	0	2.24276e+06	1.54534e+06	4.09056e+06	639775	7.92675e+06	0	0	879349	0	0	0	3.01322e+06	2.02105e+06	0	0	2.46366e+07	0	0	0	0	0	0	0	0	0	0	0
	P07858	CATB_HUMAN	Cathepsin B (EC 3.4.22.1) (APP secretase) (APPS) (Cathepsin B1) [Cleaved into: Cathepsin B light chain; Cathepsin B heavy chain]	8.86764e+06	1.93721e+06	2.82005e+06	0	1.40963e+06	958156	792290	276210	0	8.54832e+06	2.88101e+06	1.07151e+06	1.57564e+06	454230	1.3821e+06	1.43058e+06	2.40527e+06	1.4833e+06	906091	890128	7.93831e+06	1.02059e+06	2.30746e+07	0	1.39031e+06	1.70883e+06	0	0	3.84745e+06	5.00206e+06	3.52109e+07	3.10468e+06	4.66302e+07	7.01816e+06	4.73172e+06	978825	874384	1.70232e+06	1.56222e+06	1.00619e+06	699425	1.03936e+06	700886	1.05353e+06	640688	1.1141e+06
	P07339	CATD_HUMAN	Cathepsin D (EC 3.4.23.5) [Cleaved into: Cathepsin D light chain; Cathepsin D heavy chain]	1.99275e+06	2.25405e+06	2.50176e+06	360944	1.11316e+06	912878	3.56278e+06	187584	3.53908e+06	2.26033e+06	1.2086e+06	857027	1.72726e+06	795966	1.59445e+06	1.78804e+06	2.48084e+06	1.4857e+06	1.23667e+06	1.24671e+06	1.79838e+06	1.55208e+06	1.24751e+07	1.5636e+06	3.04092e+06	603430	745766	604423	510978	733621	2.67196e+06	2.43965e+06	3.29962e+06	4.67302e+06	6.58769e+06	1.53915e+06	1.11581e+06	2.03546e+06	2.85785e+06	2.07105e+06	1.96407e+06	1.81283e+06	1.05997e+06	2.41981e+06	1.69906e+06	1.72985e+06
	Q9UBX1	CATF_HUMAN	Cathepsin F (CATSF) (EC 3.4.22.41)	0	0	0	0	0	0	0	0	0	0	0	0	0	0	0	0	0	0	0	0	0	0	0	0	0	0	0	0	0	0	0	0	0	0	0	0	0	0	0	0	0	0	0	0	0	0
	P08311	CATG_HUMAN	Cathepsin G (CG) (EC 3.4.21.20)	2.95638e+06	0	1.45433e+06	4.18391e+06	590484	798776	3.80049e+06	0	1.44598e+07	2.54743e+06	935535	7.46754e+06	7.84209e+06	0	448331	4.84728e+06	3.14858e+06	0	0	1.33678e+06	4.33509e+06	5134919	6.30735e+06	2.64218e+07	0	0	0	433478	0	1.42478e+06	3.04196e+07	2.7662e+06	5.19403e+06	1.75754e+07	4.15284e+07	0	0	0	0	0	0	0	0	0	0	0
	P07711	CATL1_HUMAN	Cathepsin L1 (EC 3.4.22.15) (Cathepsin L) (Major excreted protein) (MEP) [Cleaved into: Cathepsin L1 heavy chain; Cathepsin L1 light chain]	3.65612e+06	689540	0	0	281912	0	0	0	0	0	0	0	0	0	0	0	0	0	438400	0	1.03808e+06	0	9.84987e+06	0	711080	0	0	0	0	1.10652e+06	5.12345e+06	0	4.67332e+06	0	0	763658	676759	1.05087e+06	1.13739e+06	0	0	919436	0	0	913753	1.17958e+06
	P25774	CATS_HUMAN	Cathepsin S (EC 3.4.22.27)	0	0	0	0	0	0	0	0	0	0	0	0	0	0	0	0	0	0	0	0	0	0	0	0	0	0	0	0	0	0	0	0	0	0	0	0	0	272343	0	0	0	0	0	0	0	0
	Q9UBR2	CATZ_HUMAN	Cathepsin Z (EC 3.4.18.1) (Cathepsin P) (Cathepsin X)	3.68318e+06	1939958	448108	0	986031	0	0	0	0	0	0	0	1.02268e+06	451556	429788	493976	734240	596970	920331	337391	1.5995e+06	0	3.67159e+06	0	1.06141e+06	259031	0	0	730013	1.67113e+06	0	1.07643e+06	7.9789e+06	0	0	1.16276e+06	659856	1.48333e+06	2.06995e+06	0	0	970798	529094	1.10667e+06	915737	1.02547e+06
	Q13740	CD166_HUMAN	CD166 antigen (Activated leukocyte cell adhesion molecule) (CD antigen CD166)	1.10455e+07	645283	0	0	312158	0	2893500	0	0	0	0	0	0	0	0	0	0	0	787877	0	305887	0	6.55063e+07	0	1.17157e+06	0	0	0	0	0	0	0	1.28786e+06	0	0	452919	404114	703045	5.23123e+06	501625	436675	442119	1.15068e+06	1.64111e+06	1.10265e+06	1.39355e+06
	Q8N6Q3	CD177_HUMAN	CD177 antigen (Human neutrophil alloantigen 2a) (HNA-2a) (NB1 glycoprotein) (NB1 GP) (Polycythemia rubra vera protein 1) (PRV-1) (CD antigen CD177)	192559	0	0	0	0	0	0	0	0	0	0	0	0	0	0	0	0	0	0	1.21767e+06	0	0	0	0	0	0	0	0	0	0	0	0	2.96455e+06	0	0	0	0	0	0	0	0	0	0	0	0	0
	P16070	CD44_HUMAN	CD44 antigen (CDw44) (Epican) (Extracellular matrix receptor III) (ECMR-III) (GP90 lymphocyte homing/adhesion receptor) (HUTCH-I) (Heparan sulfate proteoglycan) (Hermes antigen) (Hyaluronate receptor) (Phagocytic glycoprotein 1) (PGP-1) (Phagocytic glycoprotein I) (PGP-I) (CD antigen CD44)	8.0934e+06	5.45659e+06	3.03292e+06	0	2486963	1.25776e+06	2.44817e+06	0	9.09968e+06	4.66113e+06	2.72101e+06	3.85626e+06	2.48166e+06	513443	2.48021e+06	1.73613e+06	3291056	2.18883e+06	2.38429e+06	2.48635e+06	3.96204e+06	2.89423e+06	1.45609e+07	1.49626e+06	3.26429e+06	839885	0	0	921200	2.55221e+06	1.48469e+07	3.54512e+06	2.36356e+07	1.54466e+07	8.78427e+06	3.56938e+06	4.21836e+06	6.20532e+06	5.00692e+06	3.64199e+06	1.74065e+06	4.88604e+06	1.81442e+06	4.44503e+06	2.88945e+06	3.10058e+06
	O43866	CD5L_HUMAN	CD5 antigen-like (Apoptosis inhibitor expressed by macrophages) (hAIM) (CT-2) (IgM-associated peptide) (SP-alpha)	4.12998e+06	325733	991346	1.94615e+06	0	895077	937649	215717	9.57554e+06	1.19892e+06	1.23098e+06	4.04695e+06	5.55179e+06	0	2.0529e+06	3.45355e+06	3.9919e+06	2.23524e+06	0	536716	1.44778e+06	2.47539e+06	516002	2.90386e+06	0	1.15631e+06	405529	143689	299954	0	2.20149e+06	5.2226e+06	3.73145e+06	2.8255e+07	1.64804e+07	0	0	0	287072	0	337163	0	0	0	0	0
	P13987	CD59_HUMAN	CD59 glycoprotein (1F5 antigen) (20 kDa homologous restriction factor) (HRF-20) (HRF20) (MAC-inhibitory protein) (MAC-IP) (MEM43 antigen) (Membrane attack complex inhibition factor) (MACIF) (Membrane inhibitor of reactive lysis) (MIRL) (Protectin) (CD antigen CD59)	4.77051e+06	5.08974e+06	0	0	2.85385e+06	0	658984	0	0	0	0	0	0	381465	460227	805836	1.18868e+06	713941	1.50117e+06	502544	2.09978e+06	606229	4.60562e+06	0	3.89098e+06	362377	0	0	0	0	5.32075e+06	2.22279e+06	9.3713e+06	3.68221e+06	1.85083e+06	5.86462e+06	4.14467e+06	6.23434e+06	2.36412e+06	0	0	6.52012e+06	1.13913e+06	2.71284e+06	1.61773e+06	1.91107e+06
	Q8TCZ2	C99L2_HUMAN	CD99 antigen-like protein 2 (MIC2-like protein 1) (CD antigen CD99)	0	673329	0	0	0	0	0	0	0	0	0	0	0	0	0	0	0	0	0	0	0	0	0	0	570215	0	0	0	0	0	0	0	0	0	0	0	0	0	0	0	0	240036	0	0	0	408922
	Q9BY67	CADM1_HUMAN	Cell adhesion molecule 1 (Immunoglobulin superfamily member 4) (IgSF4) (Nectin-like protein 2) (NECL-2) (Spermatogenic immunoglobulin superfamily) (SgIgSF) (Synaptic cell adhesion molecule) (SynCAM) (Tumor suppressor in lung cancer 1) (TSLC-1)	1.2483e+06	1.38132e+06	0	0	373383	0	0	0	0	0	0	0	0	0	0	0	0	0	510251	0	678303	0	1.56405e+06	0	1.24489e+06	336708	0	0	0	607827	0	0	2.428e+06	0	0	955874	816289	1.5681e+06	1.30231e+06	936541	726847	1.55284e+06	517206	1.12904e+06	721513	1.41611e+06
	Q8N3J6	CADM2_HUMAN	Cell adhesion molecule 2 (Immunoglobulin superfamily member 4D) (IgSF4D) (Nectin-like protein 3) (NECL-3) (Synaptic cell adhesion molecule 2) (SynCAM 2)	1.56761e+06	2.8711e+06	0	0	852593	0	0	0	0	0	0	0	0	0	0	0	0	0	743574	0	0	0	0	0	2.58697e+06	0	0	0	0	0	0	0	0	0	0	0	0	942915	0	0	0	1.19915e+06	0	0	1.39184e+06	2.12635e+06
	Q8N126	CADM3_HUMAN	Cell adhesion molecule 3 (Brain immunoglobulin receptor) (Immunoglobulin superfamily member 4B) (IgSF4B) (Nectin-like protein 1) (NECL-1) (Synaptic cell adhesion molecule 3) (SynCAM3) (TSLC1-like protein 1) (TSLL1)	752245	1.82566e+06	0	0	424396	0	0	0	0	0	0	0	0	0	0	0	0	0	642364	0	1.04133e+06	0	1.02168e+06	0	1.81529e+06	0	0	0	0	0	0	0	3.0955e+06	4.22834e+06	0	1.04084e+06	1.61487e+06	2.16027e+06	1.32641e+06	868021	0	2.00417e+06	889693	1.51728e+06	1.36229e+06	1.63262e+06
	Q8NFZ8	CADM4_HUMAN	Cell adhesion molecule 4 (Immunoglobulin superfamily member 4C) (IgSF4C) (Nectin-like protein 4) (NECL-4) (TSLC1-like protein 2)	686933	1.85536e+06	0	0	417744	0	345121	0	0	899324	1.18291e+06	0	0	271919	0	0	0	469813	655362	356296	700997	0	582120	0	2.65967e+06	306474	0	0	347117	275037	1.18107e+06	0	2.73258e+06	0	0	1.23792e+06	841542	1.9125e+06	1.75108e+06	1.22189e+06	1.47238e+06	918859	739590	2.02544e+06	1.23916e+06	1.36172e+06
	P60953	CDC42_HUMAN	Cell division control protein 42 homolog (G25K GTP-binding protein)	0	0	0	0	0	0	0	0	0	0	0	0	0	0	0	218405	0	0	0	0	0	0	0	2.76753e+06	0	0	0	0	0	0	0	0	0	0	0	0	0	0	0	0	0	0	0	0	0	0
	Q99674	CGRE1_HUMAN	Cell growth regulator with EF hand domain protein 1 (Cell growth regulatory gene 11 protein) (Hydrophobestin)	692733	1.20137e+06	0	0	489459	0	0	0	0	0	209636	0	0	0	0	0	0	0	233991	0	0	0	902085	0	1.30409e+06	0	0	0	0	550332	601644	0	2.1961e+06	0	0	762756	682057	814826	817517	556283	448314	606739	557062	1.17608e+06	847637	1.13646e+06
	P43121	MUC18_HUMAN	Cell surface glycoprotein MUC18 (Cell surface glycoprotein P1H12) (Melanoma cell adhesion molecule) (Melanoma-associated antigen A32) (Melanoma-associated antigen MUC18) (S-endo 1 endothelial-associated antigen) (CD antigen CD146)	1.20966e+06	1.68891e+06	0	91411.6	597319	0	0	0	0	958194	0	728924	0	0	0	0	0	0	131195	0	0	0	0	0	1.68777e+06	0	0	0	0	0	0	0	1.78662e+06	0	0	1.27875e+06	735229	1.94694e+06	3.09061e+06	1.10227e+06	700670	1.6848e+06	651588	1.73146e+06	1.28597e+06	1.11687e+06
	P29762	RABP1_HUMAN	Cellular retinoic acid-binding protein 1 (Cellular retinoic acid-binding protein I) (CRABP-I)	0	0	0	0	0	0	0	0	0	0	0	0	0	0	0	0	1.60535e+06	0	0	0	0	0	0	0	0	0	0	0	0	991963	0	0	0	0	0	0	0	0	0	0	0	0	0	0	0	0
	Q6UW01	CBLN3_HUMAN	Cerebellin-3	0	0	0	0	0	0	0	0	0	0	0	0	0	0	0	0	0	0	0	0	0	0	0	0	855323	0	0	0	0	0	0	0	0	0	0	598437	321520	967790	0	0	0	521854	0	0	1.14262e+06	1641623
	Q9NTU7	CBLN4_HUMAN	Cerebellin-4 (Cerebellin-like glycoprotein 1)	0	0	0	0	0	0	0	0	0	0	0	0	0	0	0	0	0	0	0	0	0	0	0	0	0	0	0	0	0	0	0	0	0	0	0	0	0	0	0	0	0	0	0	599494	0	0
	P00450	CERU_HUMAN	Ceruloplasmin (EC 1.16.3.1) (Ferroxidase)	1.77516e+07	5.24578e+06	1.64417e+07	9.06913e+06	3.48992e+06	9.26593e+06	1.16741e+07	2.14011e+06	1.0803e+08	3.12587e+07	2.36612e+07	1.96274e+07	2.17112e+07	1.9914e+06	1.37139e+07	1.42553e+07	2.33447e+07	1.3811e+07	5.0209e+06	9.925e+06	1.73372e+07	1.07176e+07	4.49826e+07	1.33581e+07	3.31287e+06	7.90045e+06	3.99241e+06	3.42726e+06	4.23132e+06	6.41809e+06	3.29267e+07	2.5239e+07	2.30945e+07	1.64104e+08	4.84452e+07	5.92814e+06	3.96041e+06	6.67753e+06	6.01482e+06	8.59867e+06	4.4607e+06	8.35727e+06	4.47147e+06	7.77746e+06	3.18422e+06	7.67059e+06
	P36222	CH3L1_HUMAN	Chitinase-3-like protein 1 (39 kDa synovial protein) (Cartilage glycoprotein 39) (CGP-39) (GP-39) (hCGP-39) (YKL-40)	1.59078e+07	4.00508e+06	2.0606e+07	737865	3.59929e+06	7.87372e+06	2.19441e+06	755285	3.1337e+06	1.18747e+07	2.56474e+06	3.76905e+06	7331290	690810	1.51742e+06	6.1483e+06	5.90863e+06	7.90664e+06	3.96085e+06	7.50209e+06	1.1864e+07	1.57099e+06	1.58422e+07	1.08251e+06	2.05949e+06	4.53069e+06	461673	348828	2.39618e+06	1.23091e+07	2.84877e+07	1.7663e+06	1.99094e+07	0	2.72956e+06	967526	630327	1.96787e+06	2.85854e+06	2.67549e+06	1.34887e+06	818486	806008	2.82383e+06	1.29493e+06	804851
	Q15782	CH3L2_HUMAN	Chitinase-3-like protein 2 (Chondrocyte protein 39) (YKL-39)	1.51712e+06	0	1.06401e+06	0	858713	2.0749e+06	1.43383e+06	343477	2.22375e+06	3.59648e+06	797075	656053	3.56017e+06	572529	2.12094e+06	2.97394e+06	2.75476e+06	3.03439e+06	206995	1.9537e+06	4.60591e+06	1.14138e+06	1.63018e+06	0	0	0	0	0	147194	393123	3.5523e+06	1.41162e+06	3.57234e+06	0	3048808	541049	0	326138	0	0	0	0	0	0	0	0
	Q13231	CHIT1_HUMAN	Chitotriosidase-1 (EC 3.2.1.14) (Chitinase-1)	0	0	0	0	0	0	0	0	3.47289e+06	0	0	0	0	0	0	715911	2.86343e+06	0	0	557749	0	1.54444e+06	0	0	0	0	0	0	0	0	0	0	1.85332e+06	2.65589e+06	4.61982e+06	0	0	0	0	0	0	0	0	0	0	0
	O00299	CLIC1_HUMAN	Chloride intracellular channel protein 1 (Chloride channel ABP) (Nuclear chloride ion channel 27) (NCC27) (Regulatory nuclear chloride ion channel protein) (hRNCC)	1.78741e+06	0	799205	0	794385	0	1.13231e+06	0	0	1.68478e+06	0	2.62053e+06	1.68988e+06	0	0	673651	0	0	0	0	1.83492e+06	864215	5.62222e+06	3.10825e+06	0	0	0	0	0	888451	4.5389e+06	0	5.81994e+06	0	0	0	0	0	0	0	0	0	0	0	0	0
	P06276	CHLE_HUMAN	Cholinesterase (EC 3.1.1.8) (Acylcholine acylhydrolase) (Butyrylcholine esterase) (Choline esterase II) (Pseudocholinesterase)	0	0	0	0	0	0	464204	0	0	0	0	0	1.37706e+06	0	0	923594	1.64129e+06	0	0	0	0	0	1.06483e+06	0	0	0	0	0	0	0	0	0	0	8.56227e+06	2.70106e+06	0	0	0	0	0	0	0	0	0	0	0
	Q9BU40	CRDL1_HUMAN	Chordin-like protein 1 (Neuralin-1) (Neurogenesin-1) (Ventroptin)	0	0	0	0	0	0	0	0	0	0	0	0	0	0	0	0	0	0	0	0	0	0	0	0	0	0	0	0	0	0	0	0	0	0	0	0	0	0	0	0	0	0	0	0	0	0
	Q13185	CBX3_HUMAN	Chromobox protein homolog 3 (HECH) (Heterochromatin protein 1 homolog gamma) (HP1 gamma) (Modifier 2 protein)	0	0	0	0	0	0	0	0	0	0	0	0	0	0	0	0	0	0	0	0	0	0	0	587260	0	0	0	0	0	0	0	0	0	0	0	0	0	0	0	0	0	0	0	0	0	0
	P10645	CMGA_HUMAN	Chromogranin-A (CgA) (Pituitary secretory protein I) (SP-I) [Cleaved into: Vasostatin-1 (Vasostatin I); Vasostatin-2 (Vasostatin II); EA-92; ES-43; Pancreastatin; SS-18; WA-8; WE-14; LF-19; Catestatin (SL21); AL-11; GV-19; GR-44; ER-37; GE-25; Serpinin-RRG; Serpinin; p-Glu serpinin precursor]	7.78617e+06	1.10033e+07	679208	0	4.25902e+06	995375	1.65542e+06	348526	2.01297e+06	3.37619e+06	5.66949e+06	1.53874e+06	1.30818e+06	536237	1.15856e+06	825612	1.39118e+06	930037	2.50755e+06	770887	3.37622e+06	525156	4.3495e+06	1.06519e+06	1.51664e+07	1.46253e+06	0	166600	1.13049e+06	2.27786e+06	2.2533e+06	2.04117e+06	1.5463e+07	9.21397e+06	1.27193e+06	7.09219e+06	7.7024e+06	8.80257e+06	6.47064e+06	4.48848e+06	3.09756e+06	6.87348e+06	3.41563e+06	8.15025e+06	4.15609e+06	6.56584e+06
	P26992	CNTFR_HUMAN	Ciliary neurotrophic factor receptor subunit alpha (CNTF receptor subunit alpha) (CNTFR-alpha)	0	970731	0	0	305298	0	0	0	0	0	0	0	0	0	0	0	0	0	0	0	0	0	0	0	1.2707e+06	0	0	0	0	0	0	0	0	0	0	771256	542566	1.06027e+06	0	0	0	943118	0	0	0	0
	Q00610	CLH1_HUMAN	Clathrin heavy chain 1 (Clathrin heavy chain on chromosome 17) (CLH-17)	5.98508e+07	0	3.54939e+07	4.25342e+07	0	0	2.94089e+07	0	0	6.06772e+07	0	0	5.64572e+07	0	0	4.55537e+07	0	0	0	0	4.754e+07	4.42985e+07	8.32971e+07	680309	0	0	0	0	0	3.95947e+07	1.25988e+08	0	1.12822e+08	0	0	0	0	0	0	0	0	0	0	0	0	0
	P10909	CLUS_HUMAN	Clusterin (Aging-associated gene 4 protein) (Apolipoprotein J) (Apo-J) (Complement cytolysis inhibitor) (CLI) (Complement-associated protein SP-40,40) (Ku70-binding protein 1) (NA1/NA2) (Testosterone-repressed prostate message 2) (TRPM-2) [Cleaved into: Clusterin beta chain (ApoJalpha) (Complement cytolysis inhibitor a chain); Clusterin alpha chain (ApoJbeta) (Complement cytolysis inhibitor b cha…	3.52096e+07	2.42205e+07	1.34123e+07	1.2555e+07	7.98749e+06	5.42568e+06	8.24161e+06	1.25772e+06	4.86135e+07	2.39705e+07	1.73808e+07	1.68404e+07	1.50592e+07	1.74745e+06	2.89008e+07	1.44534e+07	2.12228e+07	1.37855e+07	9.72776e+06	7.03635e+06	2.24612e+07	8.41699e+06	5.06474e+07	8.77941e+06	1.42579e+07	6.95543e+06	3.3785e+06	2.72771e+06	6.82636e+06	1.66787e+07	3.2077e+07	1.90898e+07	5.746e+07	1.37942e+08	4.99325e+07	2.51112e+07	1.88915e+07	3.29471e+07	2.77901e+07	2.4547e+07	1.77618e+07	2.01804e+07	1.44719e+07	2.94807e+07	2.47331e+07	2.45783e+07
	Q14019	COTL1_HUMAN	Coactosin-like protein	3.1904e+06	280766	812739	0	1.1549e+06	0	835723	0	0	730247	0	1987477	940795	0	490244	735666	0	0	0	328736	1.0542e+06	800465	5.33969e+06	1.75516e+06	0	0	0	0	0	0	9.84841e+06	0	5.89021e+06	0	0	0	0	0	0	0	0	0	0	0	0	0
	P00740	FA9_HUMAN	Coagulation factor IX (EC 3.4.21.22) (Christmas factor) (Plasma thromboplastin component) (PTC) [Cleaved into: Coagulation factor IXa light chain; Coagulation factor IXa heavy chain]	2.49641e+06	189776	598993	0	141570	381126	569205	0	9.33645e+06	1.77439e+06	946549	1.86065e+06	1.97558e+06	0	2.68033e+06	931425	3.33154e+06	1.51908e+06	0	747673	1.19275e+06	781984	3.05282e+06	1.17611e+06	0	0	0	0	0	0	1.90101e+06	1.75452e+06	3.27883e+06	2.11476e+07	4.55157e+06	305942	314991	514431	0	304386	0	315720	0	0	0	0
	P12259	FA5_HUMAN	Coagulation factor V (Activated protein C cofactor) (Proaccelerin, labile factor) [Cleaved into: Coagulation factor V heavy chain; Coagulation factor V light chain]	581347	706142	508104	0	342877	281204	500237	0	3.00535e+06	703564	534563	946870	537397	260843	845035	632775	867265	712409	316495	359769	530504	485142	2.00244e+06	0	653590	288205	143853	0	0	314839	0	685342	0	2.51337e+06	1.70751e+06	479881	442750	571648	636109	405805	542530	406162	421945	819321	566258	565867
	P00742	FA10_HUMAN	Coagulation factor X (EC 3.4.21.6) (Stuart factor) (Stuart-Prower factor) [Cleaved into: Factor X light chain; Factor X heavy chain; Activated factor Xa heavy chain]	967757	0	692829	2.05e+06	0	703388	449904	0	1.27555e+07	1.41716e+06	438042	2.95417e+06	1.88942e+06	0	2.61018e+06	1.70038e+06	3.25952e+06	891337	239596	547944	973201	899605	2.86776e+06	1.19396e+06	0	566288	55710.3	0	0	444254	2.28499e+06	2.6661e+06	3.74982e+06	1.78525e+07	7.42057e+06	631195	501762	805312	1.21576e+06	1.31388e+06	880954	455403	435253	1.11245e+06	766465	853505
	P03951	FA11_HUMAN	Coagulation factor XI (FXI) (EC 3.4.21.27) (Plasma thromboplastin antecedent) (PTA) [Cleaved into: Coagulation factor XIa heavy chain; Coagulation factor XIa light chain]	0	0	0	0	0	0	0	0	0	0	0	0	0	0	0	0	956962	0	0	0	0	0	0	0	0	0	0	0	0	0	0	0	0	0	0	0	0	0	0	0	0	0	0	0	0	0
	P00748	FA12_HUMAN	Coagulation factor XII (EC 3.4.21.38) (Hageman factor) (HAF) [Cleaved into: Coagulation factor XIIa heavy chain; Beta-factor XIIa part 1; Coagulation factor XIIa light chain (Beta-factor XIIa part 2)]	4.40599e+06	921235	1.95307e+06	2.25355e+06	245807	686783	1.21307e+06	0	1.26435e+07	3.89365e+06	539200	4.42824e+06	4.89089e+06	0	4.28954e+06	1.92024e+06	2.94329e+06	1.69009e+06	798900	385856	3.21964e+06	2.9133e+06	7.68901e+06	2.69919e+06	792169	665897	0	378207	477796	598849	6.4004e+06	4.86879e+06	5.66766e+06	2.82972e+07	9.91297e+06	1.44159e+06	1.18072e+06	1.32192e+06	2.84222e+06	2.19521e+06	1.27743e+06	1.74548e+06	1.23815e+06	2.56305e+06	1.64051e+06	2.81517e+06
	P00488	F13A_HUMAN	Coagulation factor XIII A chain (Coagulation factor XIIIa) (EC 2.3.2.13) (Protein-glutamine gamma-glutamyltransferase A chain) (Transglutaminase A chain)	0	0	3.68444e+06	0	0	0	0	0	0	0	0	1.35996e+06	478450	0	438643	568560	558091	274302	0	0	503282	0	1.98176e+06	453723	0	0	0	0	0	0	3.10378e+06	308318	1.79109e+06	0	0	0	0	0	0	0	0	0	0	0	0	0
	P05160	F13B_HUMAN	Coagulation factor XIII B chain (Fibrin-stabilizing factor B subunit) (Protein-glutamine gamma-glutamyltransferase B chain) (Transglutaminase B chain)	709019	0	310411	618195	0	0	215555	0	2.62174e+06	0	634709	838297	881075	0	1.31015e+06	980451	1.50328e+06	396601	0	234546	528803	607280	1.28781e+06	739667	0	0	0	0	0	0	1.20238e+06	1.35748e+06	651725	7.40165e+06	4.69334e+06	0	50009.4	75648.4	6.98038e+06	0	0	0	0	0	0	0
	Q16568	CART_HUMAN	Cocaine- and amphetamine-regulated transcript protein [Cleaved into: CART(1-39); CART(42-89)]	754745	751179	0	0	272375	0	0	0	0	0	0	0	0	0	0	0	0	0	340666	0	295626	0	0	0	772710	0	0	0	0	0	0	0	1.47657e+06	1.41976e+06	0	445312	638585	850135	307957	0	0	631401	320841	1.25349e+06	671918	609855
	O43405	COCH_HUMAN	Cochlin (COCH-5B2)	0	0	0	0	0	0	0	0	0	0	0	0	0	0	0	0	0	0	0	0	0	0	0	0	0	0	0	0	0	0	0	0	1.92676e+06	0	0	0	569742	0	0	0	0	1.24511e+06	0	0	0	0
	P23528	COF1_HUMAN	Cofilin-1 (18 kDa phosphoprotein) (p18) (Cofilin, non-muscle isoform)	2.75755e+06	0	2.42371e+06	2.20296e+06	1.34525e+06	0	2.83769e+06	0	0	2.83716e+06	0	2.48274e+06	2.80374e+06	103571	754390	1.17625e+06	1.23325e+06	741169	0	457248	2.83177e+06	2.38824e+06	6.4217e+06	9.46939e+06	0	0	0	0	0	0	4.13487e+06	0	8.56848e+06	1.4907e+06	2.48143e+06	0	0	0	0	0	0	0	0	0	0	0
	P02452	CO1A1_HUMAN	Collagen alpha-1(I) chain (Alpha-1 type I collagen)	778648	948986	0	0	859759	0	0	0	0	1.43553e+06	0	0	172722	0	2.17864e+06	0	0	364562	536847	0	643296	0	0	0	1.28688e+06	497954	0	0	0	1.47545e+06	5.20965e+06	0	5.46777e+06	0	0	1.15503e+06	732825	1.28744e+06	1.32466e+06	1.6279e+06	924516	736242	734041	1.63514e+06	843633	1.29795e+06
	P02461	CO3A1_HUMAN	Collagen alpha-1(III) chain	0	0	0	0	158207	0	0	0	0	0	0	0	0	0	0	0	0	0	0	0	0	0	0	0	0	0	0	0	0	0	0	0	5.80272e+07	0	0	352675	224879	0	0	0	0	193224	0	0	0	0
	P12109	CO6A1_HUMAN	Collagen alpha-1(VI) chain	1.25175e+06	1.25001e+06	568385	0	437544	157537	442961	0	975174	1.37603e+06	588220	0	0	0	0	0	607055	428555	546950	186233	889067	448143	1.36666e+06	0	1.48685e+06	361639	0	0	254869	875311	3.43674e+06	509056	3.23506e+06	4.48051e+06	1987311	778495	862011	1.33573e+06	1.61811e+06	1.38805e+06	787644	927468	769590	1.45247e+06	1.20342e+06	1.64107e+06
	P39059	COFA1_HUMAN	Collagen alpha-1(XV) chain [Cleaved into: Restin (Endostatin-XV) (Related to endostatin) (Restin-I); Restin-2 (Restin-II); Restin-3 (Restin-III); Restin-4 (Restin-IV)]	0	160920	0	0	0	0	0	0	0	0	0	0	0	0	0	0	0	0	0	0	0	0	0	0	0	0	0	0	0	0	0	0	0	0	0	93845.9	0	149782	0	0	0	0	0	0	0	143480
	P39060	COIA1_HUMAN	Collagen alpha-1(XVIII) chain [Cleaved into: Endostatin]	1.80834e+06	1.79389e+06	0	0	484996	203799	376801	0	0	1.19809e+06	0	0	569242	0	0	0	1.22328e+06	413837	441535	334207	784292	0	2.09364e+06	0	1.27923e+06	215530	0	0	320704	794215	3.34977e+06	743642	2.15508e+06	0	0	735091	696063	1.04567e+06	991297	656185	382397	707113	535221	1.31339e+06	756638	948843
	P08123	CO1A2_HUMAN	Collagen alpha-2(I) chain (Alpha-2 type I collagen)	399038	467842	514420	0	620109	0	0	0	0	616964	0	0	0	0	617631	0	0	0	289468	0	0	0	0	0	574556	228447	0	0	0	913888	2.30612e+06	0	2.82005e+06	0	0	617117	500172	827265	1.21409e+06	584991	288888	561447	329909	910903	456537	640715
	P12111	CO6A3_HUMAN	Collagen alpha-3(VI) chain	973779	593662	0	0	432365	0	0	0	0	0	1.13883e+06	0	0	0	350556	0	1.00284e+06	0	195230	0	824118	0	0	0	503188	0	0	0	0	870370	2.33002e+06	0	2.46708e+06	0	0	234612	0	291673	0	308725	0	208442	0	631538	286279	605220
	Q5KU26	COL12_HUMAN	Collectin-12 (Collectin placenta protein 1) (CL-P1) (hCL-P1) (Nurse cell scavenger receptor 2) (Scavenger receptor class A member 4) (Scavenger receptor with C-type lectin)	0	1114501	0	0	0	0	0	0	0	0	0	0	0	0	0	0	0	0	348225	0	0	0	0	0	757253	0	0	0	0	0	0	0	0	0	0	415806	462873	638495	0	0	0	623768	0	941013	514044	570519
	P02745	C1QA_HUMAN	Complement C1q subcomponent subunit A	1.64302e+07	6.06083e+06	0	2.21947e+06	7.16469e+06	1.20434e+06	0	488765	0	7.72854e+06	1.64313e+06	0	4.65606e+06	0	2.35659e+06	3.78506e+06	5.2118e+06	2.55947e+06	3.19304e+06	1.38985e+06	5.06486e+06	3.12579e+06	1.73793e+07	0	2.78681e+06	0	0	0	1.69902e+06	3.51789e+06	2.95725e+07	8.04162e+06	2.36669e+07	8.5094e+07	1.14581e+07	3.18492e+06	2.27347e+06	3.28968e+06	3.8345e+06	3.02325e+06	2.68125e+06	1.84318e+06	1.29733e+06	3.24401e+06	1.61722e+06	2.41231e+06
	P02746	C1QB_HUMAN	Complement C1q subcomponent subunit B	1.81411e+07	7.27552e+06	1.83186e+06	3.34093e+06	4.1033e+06	2.65964e+06	2.38214e+06	525504	0	8.1948e+06	2.67702e+06	7.36011e+06	4.25418e+06	381111	4.38139e+06	2.99818e+06	4.22026e+06	2.99906e+06	2.48268e+06	1.7946e+06	4.58786e+06	4.55782e+06	1.53956e+07	1.52472e+06	2.19106e+06	4.31293e+06	508926	649214	2.60869e+06	3.54173e+06	3.39067e+07	1.05694e+07	3.05067e+07	4.16561e+07	1.11106e+07	2.9559e+06	1.9784e+06	3.46897e+06	5.21281e+06	8.17895e+06	4.06494e+06	1.15253e+06	1.17264e+06	3.49863e+06	1.51125e+06	2.78536e+06
	P02747	C1QC_HUMAN	Complement C1q subcomponent subunit C	2.94556e+07	1.12614e+07	3.81911e+06	5.68612e+06	7.46597e+06	3.20414e+06	3.52538e+06	562914	1.13199e+07	1.83221e+07	4.04511e+06	1.49086e+07	8.74132e+06	348334	9.4682e+06	5.41569e+06	1.24674e+07	5.34595e+06	5.39983e+06	1.97427e+06	8.24692e+06	5.81849e+06	3.29566e+07	4.36674e+06	4.4665e+06	6.94977e+06	1.12485e+06	1.16338e+06	4.45257e+06	7.7976e+06	5.94853e+07	1.90406e+07	59784563	7.4605e+07	2.25185e+07	3.67782e+06	3.51635e+06	5.91585e+06	8.09978e+06	8.68735e+06	5.17405e+06	2.36027e+06	1.99338e+06	5.82439e+06	2.40707e+06	3.94805e+06
	P00736	C1R_HUMAN	Complement C1r subcomponent (EC 3.4.21.41) (Complement component 1 subcomponent r) [Cleaved into: Complement C1r subcomponent heavy chain; Complement C1r subcomponent light chain]	5.66367e+06	1.94938e+06	809995	1.03383e+06	1.56246e+06	774066	713104	0	4.61435e+06	3.85517e+06	3.13742e+06	2.61675e+06	2.55265e+06	152847	2.31168e+06	1.50708e+06	2.34593e+06	1.37896e+06	1.19263e+06	751301	2.92637e+06	1.80295e+06	6.83232e+06	1.45423e+06	1.39169e+06	1.62602e+06	281041	377750	992795	2.97616e+06	6.62799e+06	4.07613e+06	1.02501e+07	2.0624e+07	5.99164e+06	1.41786e+06	1.11856e+06	2.07954e+06	2.12803e+06	1.85874e+06	1.40816e+06	1.57516e+06	521806	1.21317e+06	746205	1.0456e+06
	Q9NZP8	C1RL_HUMAN	Complement C1r subcomponent-like protein (C1r-LP) (C1r-like protein) (EC 3.4.21.-) (C1r-like serine protease analog protein) (CLSPa)	2.16937e+06	223922	804088	625042	211264	495945	609073	0	1.21059e+07	2.96745e+06	0	1.51947e+06	1.48503e+06	0	1.66947e+06	929794	1.8946e+06	1.09122e+06	410991	482671	1.05543e+06	857712	3.73816e+06	0	0	0	2120187	181134	260635	872255	3.35557e+06	1.61385e+06	3.21816e+06	1.30181e+07	5.53659e+06	518674	311843	473229	624772	598575	417311	265542	2.22663e+06	557459	259630	3.51536e+06
	P09871	C1S_HUMAN	Complement C1s subcomponent (EC 3.4.21.42) (C1 esterase) (Complement component 1 subcomponent s) [Cleaved into: Complement C1s subcomponent heavy chain; Complement C1s subcomponent light chain]	4.86119e+06	3.7216e+06	1.33554e+06	1.58189e+06	2.63233e+06	834854	1.22442e+06	533736	5.93781e+06	3.72476e+06	1.75044e+06	4.604e+06	2.38012e+06	214039	2.74136e+06	1.48046e+06	2.16937e+06	1.37676e+06	2.05008e+06	699456	2.18016e+06	1.50952e+06	6.53784e+06	1.79586e+06	2.90391e+06	1.45118e+06	860322	857088	1.13898e+06	3.0247e+06	7.96963e+06	3.5724e+06	9.75689e+06	1.59734e+07	8.34485e+06	1.92704e+06	1.77039e+06	3.14501e+06	3.39995e+06	2.90403e+06	2.4762e+06	2.25872e+06	1.28091e+06	2.82058e+06	1.53984e+06	1.91551e+06
	P06681	CO2_HUMAN	Complement C2 (EC 3.4.21.43) (C3/C5 convertase) [Cleaved into: Complement C2b fragment; Complement C2a fragment]	4.07225e+06	965594	1.94314e+06	1.27519e+06	662277	1.1491e+06	1.10894e+06	197474	7.23128e+06	5.62354e+06	2.80957e+06	3.31047e+06	2.21532e+06	141044	2.72084e+06	1.52497e+06	2.88593e+06	1.04274e+06	606217	1.0419e+06	2.09186e+06	1.37587e+06	4.09887e+06	1.22573e+06	860454	1.35511e+06	380166	442290	716137	2.50742e+06	7.74297e+06	2.52251e+06	6.01355e+06	2.24097e+07	7.97368e+06	578783	426372	935161	1.15779e+06	1.66756e+06	1.15428e+06	522177	352298	1.1868e+06	537883	710823
	P01024	CO3_HUMAN	Complement C3 (C3 and PZP-like alpha-2-macroglobulin domain-containing protein 1) [Cleaved into: Complement C3 beta chain; C3-beta-c (C3bc); Complement C3 alpha chain; C3a anaphylatoxin; Acylation stimulating protein (ASP) (C3adesArg); Complement C3b alpha' chain; Complement C3c alpha' chain fragment 1; Complement C3dg fragment; Complement C3g fragment; Complement C3d fragment; Complement C3f fra…	2.37509e+07	1.45487e+07	2.26074e+07	2.24269e+07	5.63514e+06	1.29384e+07	1.78213e+07	3.29594e+06	1.96951e+08	5.68782e+07	3.35938e+07	5.3029e+07	4.49036e+07	1.75376e+06	4.31693e+07	2.51714e+07	5.81931e+07	2.19233e+07	7.83511e+06	1.44259e+07	2.04306e+07	1.64311e+07	4.20365e+07	1.67805e+07	9.24834e+06	1.4362e+07	6.85017e+06	5.76496e+06	5.27112e+06	1.47135e+07	5.65843e+07	3.59848e+07	3.54662e+07	2.61415e+08	1.20972e+08	9.55959e+06	5.56366e+06	1.08472e+07	1.77455e+07	1.67015e+07	1.41612e+07	8.40233e+06	5.40256e+06	1.46315e+07	8.37735e+06	1.16608e+07
	P0C0L4	CO4A_HUMAN	Complement C4-A (Acidic complement C4) (C3 and PZP-like alpha-2-macroglobulin domain-containing protein 2) [Cleaved into: Complement C4 beta chain; Complement C4-A alpha chain; C4a anaphylatoxin; C4b-A; C4d-A; Complement C4 gamma chain]	5.47216e+06	3.96108e+06	0	3.4659e+06	2.91833e+06	2.9695e+06	3.93498e+06	1.52659e+06	2.0288e+07	9.87091e+06	1.39041e+06	1.65513e+07	8.54701e+06	546326	9.88182e+06	4.25475e+06	6.38793e+06	7.33558e+06	2.84074e+06	2.0597e+06	5.87529e+06	5.8986e+06	0	2.38693e+06	3.99422e+06	2.41094e+06	917704	0	2.52632e+06	4.16816e+06	1.46585e+07	9.00155e+06	1.3535e+07	21523777	1.8811e+07	3118250	5621664	3.65086e+06	4.63481e+06	3.82327e+06	0	1.08431e+07	1.18061e+06	3.28925e+06	1.41383e+06	1.76356e+06
	P0C0L5	CO4B_HUMAN	Complement C4-B (Basic complement C4) (C3 and PZP-like alpha-2-macroglobulin domain-containing protein 3) [Cleaved into: Complement C4 beta chain; Complement C4-B alpha chain; C4a anaphylatoxin; C4b-B; C4d-B; Complement C4 gamma chain]	1.03016e+07	6.04012e+06	7.73416e+06	3.58554e+06	3.00841e+06	5.16453e+06	5.75756e+06	785234	3.58857e+07	2.54966e+07	1.73808e+07	9.5253e+06	1.26887e+07	418200	6.67063e+06	3.61806e+06	1.19578e+07	6.59526e+06	3.32688e+06	4.45939e+06	1.18389e+07	5.03732e+06	1.6686e+07	5.11667e+06	4.78497e+06	4.76569e+06	0	1.25562e+06	2.73719e+06	5.78892e+06	1.73215e+07	7.57168e+06	1.28595e+07	6.40774e+07	2.77234e+07	5.81406e+06	2.73978e+06	4.33974e+06	5.48015e+06	8.22497e+06	3.9664e+06	5.78477e+06	2.24497e+06	6.61632e+06	3.13345e+06	3.41444e+06
	P01031	CO5_HUMAN	Complement C5 (C3 and PZP-like alpha-2-macroglobulin domain-containing protein 4) [Cleaved into: Complement C5 beta chain; Complement C5 alpha chain; C5a anaphylatoxin; Complement C5 alpha' chain]	2.74638e+06	881538	2.99809e+06	2.66592e+06	521083	1.18677e+06	1.58857e+06	331877	2.15227e+07	5.56953e+06	2.82623e+06	5.92282e+06	3.85275e+06	213107	4.44523e+06	2.58323e+06	4.25444e+06	2.55559e+06	378492	1.36873e+06	1.75096e+06	1.53062e+06	6.80605e+06	2.00332e+06	861619	1.33684e+06	442400	545733	619565	1.45935e+06	7.35528e+06	4.05147e+06	4.11037e+06	2.62504e+07	9.56847e+06	866794	472771	829840	1.45142e+06	1.47753e+06	1.14733e+06	690154	489460	1.33764e+06	660238	1.01446e+06
	P13671	CO6_HUMAN	Complement component C6	2.66965e+06	2.60386e+06	1.27311e+06	1.91335e+06	0	597854	1.27045e+06	128380	1.49833e+07	3.41092e+06	1447753	3.48208e+06	3.01245e+06	0	3.57687e+06	1.99354e+06	4.60103e+06	1.787e+06	246897	979946	1.9699e+06	1.8766e+06	3.62591e+06	1.62924e+06	0	814469	467408	0	306833	0	3.26619e+06	2.31767e+06	3.22269e+06	2.07723e+07	4.50635e+06	681105	475274	651266	771068	1.06996e+06	693292	551028	0	0	197789	708280
	P10643	CO7_HUMAN	Complement component C7	8.13999e+06	4.06294e+06	2.23297e+06	1.33414e+06	1.89938e+06	576455	994510	144934	1.76218e+07	4.44217e+06	4.38418e+06	4.15199e+06	3.08781e+06	372001	3.49428e+06	1.99819e+06	2.26225e+06	1.70309e+06	1.73029e+06	943361	1.30831e+06	1.94654e+06	1.55573e+07	1.79413e+06	1.9779e+06	1.91573e+06	346736	412857	923602	1.92934e+06	1.42093e+07	3.79217e+06	2.11012e+07	2.00268e+07	1.40319e+07	2.9031e+06	1.67934e+06	2.83802e+06	2.6568e+06	3.17462e+06	1.82835e+06	3.27015e+06	829208	1.81769e+06	1.25982e+06	1.44719e+06
	P07357	CO8A_HUMAN	Complement component C8 alpha chain (Complement component 8 subunit alpha)	3.38193e+06	415038	1.55368e+06	1.75179e+06	98848	1.01322e+06	1.36284e+06	0	1.77392e+07	3.76472e+06	1.74444e+06	3.81061e+06	3.11204e+06	0	2.04372e+06	1.60803e+06	3.70305e+06	1.94675e+06	443591	734737	1.98033e+06	2.01512e+06	5.66326e+06	2.04522e+06	472529	1.14009e+06	402298	562467	591462	1.13494e+06	3.05362e+06	3.65224e+06	2.25703e+06	2.59047e+07	1.33801e+07	714623	393475	659881	1.01473e+06	1.30874e+06	592772	644847	391913	1.24906e+06	434553	746062
	P07358	CO8B_HUMAN	Complement component C8 beta chain (Complement component 8 subunit beta)	2.48276e+06	456501	1.48813e+06	1.21191e+06	94321.6	672296	1.07195e+06	0	1.41722e+07	3.01925e+06	1.69389e+06	2.32329e+06	2.98244e+06	284074	2.11282e+06	1.61374e+06	2.82837e+06	1.70044e+06	443984	919589	1.7922e+06	1.36314e+06	3.59658e+06	1.25684e+06	535716	768386	342147	510274	501666	1.05599e+06	3.29765e+06	2.80701e+06	2.56793e+06	1.32385e+07	7.33253e+06	494802	383602	676872	1.18966e+06	1.35688e+06	1.25078e+06	509299	344608	879497	462293	442279
	P07360	CO8G_HUMAN	Complement component C8 gamma chain	3.93759e+06	413230	2533706	1.48912e+06	154221	837564	1.1423e+06	0	2.68661e+07	3.80858e+06	2.56232e+06	3.55168e+06	3.75375e+06	0	2.60814e+06	2.06338e+06	8.18292e+06	2.28155e+06	509525	998688	1.82942e+06	1.94314e+06	7.56429e+06	1.5804e+06	0	1.12978e+06	372328	781039	462574	1291809	3.59335e+06	3.1969e+06	3.74103e+06	3.21283e+07	9.21118e+06	743205	465206	779645	0	914649	0	528007	689453	1.14618e+06	0	1.10784e+06
	P02748	CO9_HUMAN	Complement component C9 [Cleaved into: Complement component C9a; Complement component C9b]	1.23802e+07	2.44743e+06	4.14797e+06	2.81445e+06	1.19082e+06	2.3157e+06	2.86263e+06	495534	3.88878e+07	1.18826e+07	4.34027e+06	7.08505e+06	9.42126e+06	434726	6.69994e+06	3.38935e+06	9.98061e+06	5.32251e+06	1.3255e+06	2.82634e+06	5.51779e+06	3.87515e+06	2.17714e+07	2.39957e+06	2.47287e+06	2.95032e+06	1.01872e+06	1.1655e+06	1.43507e+06	2.31997e+06	2.28759e+07	4.78878e+06	1.32879e+07	6.69488e+07	2.9736e+07	2.4342e+06	1.16242e+06	2.88709e+06	2.37394e+06	3.57726e+06	3.02584e+06	2.67429e+06	1.10395e+06	2.54614e+06	1.67613e+06	1.81745e+06
	P08174	DAF_HUMAN	Complement decay-accelerating factor (CD antigen CD55)	765316	803922	0	0	296721	0	0	0	0	0	0	0	3.06878e+06	0	0	0	0	0	342451	0	0	0	0	0	659123	0	0	0	0	0	2.21881e+06	538160	3.61466e+06	0	0	1.00125e+06	641255	1.80454e+06	0	0	0	1.23228e+06	0	951988	497814	478213
	P00751	CFAB_HUMAN	Complement factor B (EC 3.4.21.47) (C3/C5 convertase) (Glycine-rich beta glycoprotein) (GBG) (PBF2) (Properdin factor B) [Cleaved into: Complement factor B Ba fragment; Complement factor B Bb fragment]	1.61405e+07	3.34761e+06	6.84001e+06	3.72894e+06	2.91574e+06	5.99394e+06	7.33986e+06	1.86489e+06	6.39944e+07	2.09953e+07	1.2773e+07	1.36517e+07	1.86606e+07	480383	9.41517e+06	9.0223e+06	2.37458e+07	1.22172e+07	3.16878e+06	1.00348e+07	1.44106e+07	1.07604e+07	3.02866e+07	7.57433e+06	2.73693e+06	3.75457e+06	2.05208e+06	2.26515e+06	2.04401e+06	6.10015e+06	1.57396e+07	2.24103e+07	3.10451e+07	1.36345e+08	8.19734e+07	4.8088e+06	3.75318e+06	7.37541e+06	6.45936e+06	6.74878e+06	3.8545e+06	4.58406e+06	1.6608e+06	4.92525e+06	1.93719e+06	3.20844e+06
	P00746	CFAD_HUMAN	Complement factor D (EC 3.4.21.46) (Adipsin) (C3 convertase activator) (Properdin factor D)	3.47964e+06	1.78478e+06	1.88351e+06	790883	929813	705210	1.08921e+06	0	4.89787e+06	3.62513e+06	1.02974e+06	3.525e+06	2.08062e+06	0	1.12145e+06	921353	2.13223e+06	1.86488e+06	918297	366580	1.41713e+06	1.72912e+06	7.81633e+06	924832	1.64342e+06	0	0	0	623591	1.69982e+06	1.86331e+07	1.63214e+06	8.12532e+06	1.29505e+07	2.05792e+06	1.07965e+06	870146	2.01756e+06	1.88094e+06	1.37906e+06	0	1.2656e+06	545763	1.38251e+06	577183	1.09936e+06
	P08603	CFAH_HUMAN	Complement factor H (H factor 1)	9.79871e+06	3.31499e+06	3.5208e+06	2.21619e+06	1.2045e+06	2.51292e+06	3.6708e+06	706824	4.25667e+07	8.79453e+06	6.05496e+06	7.77992e+06	7.62966e+06	260593	7.95082e+06	5.69401e+06	1.17501e+07	6.03758e+06	1.58781e+06	2.86719e+06	6.69706e+06	5.99393e+06	1.93014e+07	5.49372e+06	1.67256e+06	1.92615e+06	1.07724e+06	940273	1.73043e+06	2.73352e+06	1.29288e+07	1.27321e+07	1.94668e+07	8.81615e+07	3.36302e+07	3.01468e+06	1.94579e+06	3.07292e+06	3.44324e+06	2.16256e+06	2.09448e+06	2.86198e+06	879745	2.21624e+06	1.41257e+06	1.88061e+06
	Q03591	FHR1_HUMAN	Complement factor H-related protein 1 (FHR-1) (H factor-like protein 1) (H-factor-like 1) (H36)	0	949476	0	0	431656	0	1.03082e+06	0	0	5.04783e+06	0	4.58963e+06	3.46146e+06	0	6.90315e+06	2.43397e+06	9.58787e+06	3.60309e+06	0	1.36337e+06	4.31117e+06	2.06735e+06	9922644	1.29866e+06	0	0	0	0	0	0	6.54531e+06	0	0	4.14662e+07	0	0	956078	1.1952e+06	948248	0	0	0	0	861156	0	0
	P36980	FHR2_HUMAN	Complement factor H-related protein 2 (FHR-2) (DDESK59) (H factor-like 3) (H factor-like protein 2)	2.30062e+06	1.04464e+06	0	0	0	536237	1.1968e+06	0	2.0207e+07	4.04865e+06	1.56244e+06	3.25704e+06	2.20378e+06	0	3.24749e+06	1.40701e+06	6.38059e+06	1.82641e+06	383053	756173	1.30962e+06	962580	8.04102e+06	2.16084e+06	0	0	0	0	204519	392017	5.42538e+06	488674	3.08221e+06	3.04373e+07	6.60571e+06	725170	434871	764353	516636	0	0	880950	0	849612	0	672660
	P05156	CFAI_HUMAN	Complement factor I (EC 3.4.21.45) (C3B/C4B inactivator) [Cleaved into: Complement factor I heavy chain; Complement factor I light chain]	5.23805e+06	1.32003e+06	3.31516e+06	1.61422e+06	653712	1.10514e+06	2.41942e+06	353103	1.62496e+07	5.46851e+06	3.80412e+06	4.79758e+06	4.47249e+06	264139	4.70553e+06	2.25157e+06	6.58427e+06	3.20874e+06	978819	1.36293e+06	4.06347e+06	2.37389e+06	9.79573e+06	1.8471e+06	1.36403e+06	1.14863e+06	987057	703203	602127	1.71284e+06	4.94622e+06	6.00046e+06	8.2053e+06	4.91795e+07	2.20784e+07	1.84289e+06	1.24167e+06	2.19566e+06	2.05628e+06	2.23153e+06	1.89914e+06	1.65618e+06	763181	1.69116e+06	932400	1.06051e+06
	P29279	CTGF_HUMAN	Connective tissue growth factor (CCN family member 2) (Hypertrophic chondrocyte-specific protein 24) (Insulin-like growth factor-binding protein 8) (IBP-8) (IGF-binding protein 8) (IGFBP-8)	1.48418e+06	1.27576e+06	0	0	209003	0	0	0	0	0	0	0	0	0	0	0	0	0	0	0	0	0	0	0	0	0	0	0	0	0	0	0	0	0	0	419366	427310	734095	0	0	0	898388	0	0	0	0
	Q12860	CNTN1_HUMAN	Contactin-1 (Glycoprotein gp135) (Neural cell surface protein F3)	1.86571e+06	3.56121e+06	566573	719111	1.12488e+06	315135	722364	0	2.09294e+06	1.81062e+06	1.4959e+06	932837	534593	171942	627340	437925	687751	685584	1.01028e+06	423007	1.3531e+06	443899	2.44237e+06	756760	3.83719e+06	451052	347703	0	508149	824197	2.36073e+06	1.58399e+06	4.3119e+06	5.20996e+06	1.29519e+06	2.47257e+06	2.56037e+06	3.5839e+06	3.24433e+06	1.99025e+06	1.60668e+06	3.70036e+06	1.32113e+06	3.10843e+06	2.69723e+06	3.10611e+06
	Q02246	CNTN2_HUMAN	Contactin-2 (Axonal glycoprotein TAG-1) (Axonin-1) (Transient axonal glycoprotein 1) (TAX-1)	435143	1.62748e+06	0	0	331071	0	409429	0	0	1.1422e+06	0	0	0	169861	321798	0	0	0	469985	0	391550	0	461109	0	1.74794e+06	0	0	0	0	0	0	2.62877e+06	1.24126e+06	0	0	1.26347e+06	1.0442e+06	2.32836e+06	1.7251e+06	791890	806039	1.49062e+06	862407	1.87539e+06	1.53232e+06	1.13421e+06
	Q9C0A0	CNTP4_HUMAN	Contactin-associated protein-like 4 (Cell recognition molecule Caspr4)	0	1.227e+06	0	0	0	0	0	0	0	0	0	0	0	0	0	0	0	0	0	0	5.89298e+06	0	0	0	1395842	0	0	0	0	0	2.59359e+06	0	0	5.18751e+07	0	941789	287311	649170	1011468	0	0	1.11316e+06	0	1.27858e+06	888422	861329
	P31146	COR1A_HUMAN	Coronin-1A (Coronin-like protein A) (Clipin-A) (Coronin-like protein p57) (Tryptophan aspartate-containing coat protein) (TACO)	6.30403e+06	0	1.92462e+06	2.58663e+06	1.28686e+06	472830	1.97464e+06	92104.1	2.88977e+06	1.73706e+06	0	3.86543e+06	2.8769e+06	0	758582	1.66264e+06	671713	368879	0	335184	2.16018e+06	1.62212e+06	8.11794e+06	1.28111e+07	0	0	257955	0	125348	1.38255e+06	1.50119e+07	821165	1.03618e+07	4.85978e+06	2.00844e+06	0	0	0	273848	0	393120	0	0	0	0	0
	P08185	CBG_HUMAN	Corticosteroid-binding globulin (CBG) (Serpin A6) (Transcortin)	7.12556e+06	3.03687e+06	6.14559e+06	7.08006e+06	2.03504e+06	3.45844e+06	4.89175e+06	817643	3.62516e+07	1.37883e+07	7.50465e+06	1.58599e+07	8.05442e+06	398723	6032197	5.25037e+06	8.08253e+06	4.17563e+06	1.51831e+06	2.42193e+06	3.80744e+06	3.73404e+06	1.77696e+07	7.69332e+06	2.73061e+06	2.96325e+06	1.29347e+06	1.24859e+06	1.56916e+06	3.50547e+06	3.12133e+07	6.94396e+06	9.72131e+06	4.48013e+07	3.66682e+07	4.50571e+06	2.46997e+06	4.24407e+06	6.76969e+06	9.56089e+06	5.56016e+06	3.67755e+06	4.07603e+06	7.11812e+06	2.96642e+06	8.91726e+06
	Q9P1F3	ABRAL_HUMAN	Costars family protein ABRACL (ABRA C-terminal-like protein)	1.05304e+06	0	0	0	141096	0	295151	0	0	0	0	0	205258	0	0	0	0	0	0	0	0	374370	3.46624e+06	0	0	0	0	0	0	0	2.1456e+06	0	0	0	0	0	0	0	0	0	0	0	0	0	0	0
	P12277	KCRB_HUMAN	Creatine kinase B-type (EC 2.7.3.2) (B-CK) (Creatine kinase B chain)	0	0	1.45361e+06	0	0	0	1.43656e+06	0	0	0	0	0	2.00075e+06	153920	0	239230	722304	554076	0	586167	344001	733955	1.35131e+06	0	0	0	401956	0	0	0	0	0	0	0	0	0	0	0	0	0	0	0	0	0	0	0
	P06732	KCRM_HUMAN	Creatine kinase M-type (EC 2.7.3.2) (Creatine kinase M chain) (M-CK) [Cleaved into: Creatine kinase M-type, N-terminally processed]	0	0	0	0	0	0	0	0	0	0	0	0	0	0	0	0	0	0	0	0	0	0	0	0	0	0	0	0	0	0	0	0	0	0	0	0	0	0	0	0	0	0	0	0	0	0
	P01040	CYTA_HUMAN	Cystatin-A (Cystatin-AS) (Stefin-A) [Cleaved into: Cystatin-A, N-terminally processed]	0	0	0	0	144711	0	0	0	0	0	0	0	0	0	0	0	0	0	0	0	0	0	0	0	0	0	0	0	0	0	0	0	0	0	0	0	0	0	0	0	0	0	0	0	0	0
	P04080	CYTB_HUMAN	Cystatin-B (CPI-B) (Liver thiol proteinase inhibitor) (Stefin-B)	0	0	0	0	0	0	0	0	0	0	0	890280	0	0	0	0	0	0	0	0	0	0	0	0	0	0	0	0	0	0	3.95008e+06	0	0	0	0	0	0	0	0	0	0	0	0	0	0	0
	P01034	CYTC_HUMAN	Cystatin-C (Cystatin-3) (Gamma-trace) (Neuroendocrine basic polypeptide) (Post-gamma-globulin)	3.25774e+07	7.55953e+07	1.24489e+07	8.50365e+06	1.53894e+07	6.5815e+06	1.2687e+07	1.45102e+06	3.45927e+07	3.2492e+07	1.57522e+07	1.32496e+07	9.17209e+06	3.32552e+06	1.38873e+07	7.19311e+06	1.32919e+07	9.00847e+06	1.54664e+07	4.51628e+06	1.98882e+07	6.11143e+06	2.73114e+07	1.58664e+07	6.95785e+07	9.04441e+06	2.55999e+06	1.87659e+06	4.32762e+06	2.20299e+07	4.50604e+07	1.81285e+07	7.87972e+07	1.48494e+08	2.59006e+07	4.40692e+07	3.86087e+07	5.86978e+07	4.56761e+07	3.28052e+07	2.09862e+07	3.85583e+07	2.09877e+07	4.92528e+07	3.80393e+07	4.42165e+07
	P54108	CRIS3_HUMAN	Cysteine-rich secretory protein 3 (CRISP-3) (Specific granule protein of 28 kDa) (SGP28)	838142	0	0	0	222329	0	2.47405e+06	0	0	0	0	3.04683e+06	3.54629e+06	0	2.2076e+06	2.63312e+06	3.46125e+06	1.06197e+06	0	962837	946354	2.49839e+06	0	1.12987e+06	0	176646	0	0	0	0	2.77385e+06	0	1.0615e+06	5.98918e+06	9.08575e+06	0	0	0	0	0	0	0	0	0	0	0
	P32320	CDD_HUMAN	Cytidine deaminase (EC 3.5.4.5) (Cytidine aminohydrolase)	2.02255e+06	0	0	0	211961	0	0	0	0	0	0	510794	0	0	0	526277	0	0	0	0	681571	666486	0	3.20474e+06	0	0	0	0	0	0	0	0	4.76385e+06	0	0	0	0	0	0	0	0	0	0	0	0	0
	Q96KP4	CNDP2_HUMAN	Cytosolic non-specific dipeptidase (EC 3.4.13.18) (CNDP dipeptidase 2) (Carnosine dipeptidase II) (Epididymis secretory protein Li 13) (Glutamate carboxypeptidase-like protein 1) (Peptidase A)	0	0	0	0	0	0	0	0	0	0	0	0	0	0	0	0	0	0	0	0	0	0	4.98383e+06	0	0	0	0	0	0	0	0	0	0	0	0	0	0	0	0	0	0	0	0	0	0	0
	P07585	PGS2_HUMAN	Decorin (Bone proteoglycan II) (PG-S2) (PG40)	0	774641	0	0	323962	0	0	0	0	0	0	0	0	0	0	0	0	0	0	0	637862	0	0	0	0	0	0	0	0	0	0	0	0	0	0	464762	0	578817	0	0	0	0	0	0	0	1.6968e+06
	Q8NFT8	DNER_HUMAN	Delta and Notch-like epidermal growth factor-related receptor	0	665818	0	0	0	0	0	0	0	0	0	0	0	0	0	0	0	0	0	0	0	0	0	0	0	0	0	0	0	0	0	0	0	0	0	860406	650975	0	0	0	0	0	0	0	0	0
	P13716	HEM2_HUMAN	Delta-aminolevulinic acid dehydratase (ALADH) (EC 4.2.1.24) (Porphobilinogen synthase)	0	0	1.09532e+06	0	0	0	0	0	0	0	0	0	0	0	0	0	0	0	0	0	0	0	0	0	0	0	0	0	0	0	0	0	0	0	0	0	0	0	0	0	0	0	0	0	0	0
	P81605	DCD_HUMAN	Dermcidin (EC 3.4.-.-) (Preproteolysin) [Cleaved into: Survival-promoting peptide; DCD-1]	0	0	0	0	0	0	0	0	0	0	0	0	0	0	0	0	0	0	1.06053e+06	0	0	0	0	0	0	0	0	0	0	0	0	0	0	0	0	0	0	0	0	0	0	0	0	0	0	0
	Q02487	DSC2_HUMAN	Desmocollin-2 (Cadherin family member 2) (Desmocollin-3) (Desmosomal glycoprotein II) (Desmosomal glycoprotein III)	0	441853	0	0	0	0	0	0	0	0	0	0	0	0	0	0	0	0	0	0	0	0	0	0	0	0	0	0	0	0	0	0	1.22703e+06	0	0	0	0	99164.7	0	0	0	0	0	0	0	0
	Q01459	DIAC_HUMAN	Di-N-acetylchitobiase (EC 3.2.1.-)	0	754626	0	0	1.10523e+06	0	0	0	0	0	0	0	261796	0	786690	0	366720	245612	0	0	0	0	0	0	0	0	0	0	0	0	0	0	0	0	0	698029	500723	333282	0	234209	0	557225	0	0	0	0
	Q9UBP4	DKK3_HUMAN	Dickkopf-related protein 3 (Dickkopf-3) (Dkk-3) (hDkk-3)	9.49168e+06	1.69494e+07	1.0121e+06	1.63194e+06	4.83936e+06	1.47989e+06	1.89685e+06	523835	6.76499e+06	1.10369e+07	6.68246e+06	2.68595e+06	2.23095e+06	692406	2.32333e+06	1.65721e+06	2.70419e+06	1.90274e+06	4.93653e+06	1.57759e+06	9.31264e+06	1.9828e+06	1.017e+07	2.68667e+06	1.44439e+07	4.52477e+06	898050	450963	3.40816e+06	2.46527e+06	4.93672e+06	4.87754e+06	2.64848e+07	26823366	7.69668e+06	9.98446e+06	1.18231e+07	1.81193e+07	1.10309e+07	9.33292e+06	5.92774e+06	1.46499e+07	6.02013e+06	1.33783e+07	7.80398e+06	9.16583e+06
	P09417	DHPR_HUMAN	Dihydropteridine reductase (EC 1.5.1.34) (HDHPR) (Quinoid dihydropteridine reductase) (Short chain dehydrogenase/reductase family 33C member 1)	0	0	0	0	0	0	0	0	0	0	0	0	0	0	0	0	0	0	0	0	0	0	0	0	0	0	0	0	0	0	0	0	0	0	0	356806	0	341713	0	0	0	0	0	0	0	0
	Q16555	DPYL2_HUMAN	Dihydropyrimidinase-related protein 2 (DRP-2) (Collapsin response mediator protein 2) (CRMP-2) (N2A3) (Unc-33-like phosphoprotein 2) (ULIP-2)	0	0	1.14243e+06	0	0	0	2.33359e+06	0	0	0	0	0	1.1897e+06	0	564098	546194	0	463550	0	707328	662732	591468	2.11304e+06	0	0	0	465224	209555	0	0	0	0	1.07173e+06	0	1.56484e+06	0	0	0	0	0	0	0	0	0	0	0
	P53634	CATC_HUMAN	Dipeptidyl peptidase 1 (EC 3.4.14.1) (Cathepsin C) (Cathepsin J) (Dipeptidyl peptidase I) (DPP-I) (DPPI) (Dipeptidyl transferase) [Cleaved into: Dipeptidyl peptidase 1 exclusion domain chain (Dipeptidyl peptidase I exclusion domain chain); Dipeptidyl peptidase 1 heavy chain (Dipeptidyl peptidase I heavy chain); Dipeptidyl peptidase 1 light chain (Dipeptidyl peptidase I light chain)]	2.53168e+06	0	0	0	0	0	0	0	0	0	1.05398e+06	0	0	0	0	0	0	0	0	0	1.40335e+06	0	3.23974e+06	0	0	0	0	0	0	0	3177183	0	4.09289e+06	0	0	0	0	0	0	0	0	0	0	0	0	0
	Q9UHL4	DPP2_HUMAN	Dipeptidyl peptidase 2 (EC 3.4.14.2) (Dipeptidyl aminopeptidase II) (Dipeptidyl peptidase 7) (Dipeptidyl peptidase II) (DPP II) (Quiescent cell proline dipeptidase)	0	0	0	0	0	0	1.02463e+06	0	0	0	0	0	0	148020	0	0	0	0	0	199628	0	0	1.0756e+06	0	490201	0	0	0	0	0	0	0	0	0	0	586974	500345	654002	905885	0	0	622015	0	910140	846866	564767
	Q9P0K1	ADA22_HUMAN	Disintegrin and metalloproteinase domain-containing protein 22 (ADAM 22) (Metalloproteinase-disintegrin ADAM22-3) (Metalloproteinase-like, disintegrin-like, and cysteine-rich protein 2)	0	2.00086e+06	0	0	0	0	0	0	0	0	0	0	0	0	0	0	0	0	0	0	0	0	0	0	1.7187e+06	0	0	0	0	0	0	0	0	0	0	1.04679e+06	1.26334e+06	1.87167e+06	1.80034e+06	1.02708e+06	0	991822	836294	0	1.72924e+06	1.53979e+06
	Q9P0K9	FRS1L_HUMAN	DOMON domain-containing protein FRRS1L (Brain protein CG-6) (Ferric-chelate reductase 1-like protein)	0	768727	0	0	0	0	0	0	0	0	0	0	0	0	0	0	0	0	0	0	0	0	0	0	542018	0	0	0	0	0	0	0	0	0	0	548997	0	0	0	0	0	611491	0	630446	409829	426866
	Q14118	DAG1_HUMAN	Dystroglycan (Dystrophin-associated glycoprotein 1) [Cleaved into: Alpha-dystroglycan (Alpha-DG); Beta-dystroglycan (Beta-DG)]	2.35368e+06	2.52277e+06	687673	0	725942	249630	433585	0	0	2.62495e+06	1.88891e+06	0	659167	0	476075	0	0	488858	1.07931e+06	0	1.09756e+06	372229	3.7095e+06	612228	1.61057e+06	672891	0	0	558250	1.67193e+06	3.42924e+06	1.08399e+06	3.83732e+06	3.36161e+06	0	2.19621e+06	1.02365e+06	2.31911e+06	1.84074e+06	1.25905e+06	638582	2.4812e+06	1.07811e+06	1.69629e+06	1.70581e+06	2.05137e+06
	Q13508	NAR3_HUMAN	Ecto-ADP-ribosyltransferase 3 (EC 2.4.2.31) (ADP-ribosyltransferase C2 and C3 toxin-like 3) (ARTC3) (Mono(ADP-ribosyl)transferase 3) (NAD(P)(+)--arginine ADP-ribosyltransferase 3)	0	762772	0	0	119296	0	0	0	0	0	0	0	0	0	0	0	0	0	139547	0	0	0	0	0	510041	0	0	0	0	0	0	0	0	0	0	0	322253	0	0	0	0	521723	0	0	321865	0
	Q13822	ENPP2_HUMAN	Ectonucleotide pyrophosphatase/phosphodiesterase family member 2 (E-NPP 2) (EC 3.1.4.39) (Autotaxin) (Extracellular lysophospholipase D) (LysoPLD)	875972	2.61646e+06	2.05614e+06	1.26065e+06	1.21921e+06	1.10229e+06	2.36723e+06	376563	2.17032e+06	1.83482e+06	2.54338e+06	1.02567e+06	1.32113e+06	2.1856e+06	2.29591e+06	1.48281e+06	1.68946e+06	1.60096e+06	2.08711e+06	1.02752e+06	2.10153e+06	2.77819e+06	1.55521e+06	1.11681e+06	4.17711e+06	963450	1.09152e+06	597737	588886	1.04057e+06	4.01648e+06	2.20431e+06	3.24802e+06	6.21554e+06	7.16657e+06	1.97802e+06	1.90592e+06	3.75102e+06	2.79613e+06	2.48392e+06	3.00578e+06	1.97635e+06	2.23435e+06	5.46698e+06	2.96491e+06	3.3263e+06
	Q96C19	EFHD2_HUMAN	EF-hand domain-containing protein D2 (Swiprosin-1)	0	0	0	0	0	0	0	0	0	0	0	0	0	0	0	0	0	0	0	0	0	0	2.17835e+06	1.42125e+06	0	0	0	0	0	0	1.4191e+06	0	0	0	0	0	0	0	0	0	0	0	0	0	0	0
	Q12805	FBLN3_HUMAN	EGF-containing fibulin-like extracellular matrix protein 1 (Extracellular protein S1-5) (Fibrillin-like protein) (Fibulin-3) (FIBL-3)	6.33014e+06	5.76626e+06	1.33625e+06	805115	1.15373e+06	934891	1.90712e+06	0	5.31216e+06	4.47713e+06	2.70257e+06	2.12533e+06	1.61025e+06	360974	2.27003e+06	1.62012e+06	2.76751e+06	1.50053e+06	2.35979e+06	890428	3.59482e+06	1.62519e+06	6.74529e+06	1.75142e+06	3.81699e+06	1.18773e+06	599781	297705	1.04335e+06	1.30439e+06	7.01952e+06	4.01438e+06	1.25812e+07	1.55808e+07	7.20502e+06	4.27149e+06	3.60238e+06	7.66222e+06	3.23687e+06	2.4526e+06	1.75854e+06	5.60791e+06	2.10057e+06	5.31523e+06	2.76182e+06	3.6154e+06
	O95967	FBLN4_HUMAN	EGF-containing fibulin-like extracellular matrix protein 2 (Fibulin-4) (FIBL-4) (Protein UPH1)	598207	928623	0	0	288631	0	0	0	0	0	0	0	0	0	0	0	0	0	241267	0	0	0	0	0	426587	0	0	0	0	0	0	0	1.42935e+06	0	0	559906	398559	764973	0	0	0	571830	204616	690834	0	421588
	P19957	ELAF_HUMAN	Elafin (Elastase-specific inhibitor) (ESI) (Peptidase inhibitor 3) (PI-3) (Protease inhibitor WAP3) (Skin-derived antileukoproteinase) (SKALP) (WAP four-disulfide core domain protein 14)	0	0	0	0	253261	0	0	0	0	0	0	0	0	0	2.00592e+06	1.23467e+06	3.22671e+06	1.55108e+06	0	5.06766e+06	1.59646e+06	0	2.89823e+06	0	0	0	0	0	0	0	0	0	4.36843e+06	0	3.44826e+06	0	0	0	0	0	0	0	0	0	0	0
	P24534	EF1B_HUMAN	Elongation factor 1-beta (EF-1-beta)	0	0	0	0	0	0	0	0	0	0	0	0	0	0	0	0	0	0	0	0	0	0	0	467147	0	0	0	0	0	0	0	0	0	0	0	0	0	0	0	0	0	0	0	0	0	0
	P13639	EF2_HUMAN	Elongation factor 2 (EF-2)	956605	0	586773	0	336452	0	643512	0	0	0	0	0	651843	0	0	408698	0	0	0	0	331916	544815	2.76641e+06	999433	0	0	0	0	0	681198	3.22245e+06	0	1.60259e+06	0	0	0	0	0	0	0	0	0	0	0	0	0
	O94919	ENDD1_HUMAN	Endonuclease domain-containing 1 protein (EC 3.1.30.-)	849849	1.5005e+06	0	0	422676	0	0	0	0	561559	0	0	0	0	0	0	0	0	380668	0	454572	0	0	0	1.33236e+06	0	0	0	165314	0	0	0	1.61308e+06	0	0	844887	669828	1.01605e+06	740188	904703	465548	782750	324995	1.07496e+06	451511	485847
	P14625	ENPL_HUMAN	Endoplasmin (94 kDa glucose-regulated protein) (GRP-94) (Heat shock protein 90 kDa beta member 1) (Tumor rejection antigen 1) (gp96 homolog)	906033	389662	1.14613e+06	0	0	0	0	0	0	0	0	0	0	0	0	0	0	0	0	0	0	0	0	961760	574389	0	0	0	0	0	2.35834e+06	0	2.32695e+06	0	0	0	0	0	0	0	0	338275	0	0	0	0
	Q9UNN8	EPCR_HUMAN	Endothelial protein C receptor (Activated protein C receptor) (APC receptor) (Endothelial cell protein C receptor) (CD antigen CD201)	0	0	0	0	0	0	0	0	0	0	0	0	0	0	0	0	0	0	209524	0	0	0	0	0	0	0	0	0	0	0	0	0	0	0	0	0	0	0	0	0	0	0	0	0	0	0
	P12724	ECP_HUMAN	Eosinophil cationic protein (ECP) (EC 3.1.27.-) (Ribonuclease 3) (RNase 3)	0	0	0	0	848936	0	1.67323e+06	0	0	0	0	1.49331e+06	1.59561e+06	0	0	882294	0	0	0	514920	772351	2.10055e+06	0	3.94267e+06	0	0	0	0	0	0	0	0	1.09235e+06	0	0	0	0	0	0	0	0	0	0	0	0	0
	P54764	EPHA4_HUMAN	Ephrin type-A receptor 4 (EC 2.7.10.1) (EPH-like kinase 8) (EK8) (hEK8) (Tyrosine-protein kinase TYRO1) (Tyrosine-protein kinase receptor SEK)	622425	977544	0	0	434937	0	0	0	0	0	411523	0	0	0	0	0	0	0	255493	0	464830	0	492728	0	1.68006e+06	0	0	0	0	0	0	0	1.59149e+06	0	0	1.04907e+06	744385	1.8199e+06	849984	608354	0	859794	392838	839315	668016	896065
	P52799	EFNB2_HUMAN	Ephrin-B2 (EPH-related receptor tyrosine kinase ligand 5) (LERK-5) (HTK ligand) (HTK-L)	0	0	0	0	0	0	0	0	0	0	0	0	0	0	0	0	0	0	0	0	0	0	0	0	0	0	0	0	0	0	0	0	0	0	0	0	0	0	0	0	0	0	0	0	0	0
	P61916	NPC2_HUMAN	Epididymal secretory protein E1 (Human epididymis-specific protein 1) (He1) (Niemann-Pick disease type C2 protein)	5.40874e+06	6.35159e+06	1.87523e+06	0	3.09893e+06	966302	3.01621e+06	0	0	3.53051e+06	3.59823e+06	867098	1.21868e+06	835914	2.75741e+06	1.52866e+06	1.78587e+06	2.17043e+06	3.0266e+06	1.34149e+06	2.80634e+06	2.15797e+06	1.07334e+07	4.31313e+06	3.05663e+06	1.10977e+06	0	0	380259	703595	4.87016e+06	4.48972e+06	1.51524e+07	1.58008e+07	7.01498e+06	5.66989e+06	4.86845e+06	7.51361e+06	3.96997e+06	2.54784e+06	1.19509e+06	8.06264e+06	1.48493e+06	5.0365e+06	2.77496e+06	3.73069e+06
	O43556	SGCE_HUMAN	Epsilon-sarcoglycan (Epsilon-SG)	0	0	0	0	0	0	0	0	0	0	0	0	0	0	0	0	0	0	0	0	0	0	0	0	897280	0	0	0	0	0	0	0	0	0	0	0	0	0	0	0	0	0	0	0	0	0
	P27105	STOM_HUMAN	Erythrocyte band 7 integral membrane protein (Protein 7.2b) (Stomatin)	0	0	535028	452722	0	0	0	0	0	0	0	0	0	0	0	0	0	0	0	0	0	0	0	502934	0	0	0	0	0	0	0	0	0	0	0	0	0	0	0	0	0	0	0	0	0	0
	Q9UBQ6	EXTL2_HUMAN	Exostosin-like 2 (EC 2.4.1.223) (Alpha-1,4-N-acetylhexosaminyltransferase EXTL2) (Alpha-GalNAcT EXTL2) (EXT-related protein 2) (Glucuronyl-galactosyl-proteoglycan 4-alpha-N-acetylglucosaminyltransferase) [Cleaved into: Processed exostosin-like 2]	0	444273	0	0	0	0	0	0	0	0	0	0	0	0	0	0	0	0	0	0	0	0	0	0	1.11571e+06	0	0	0	0	0	0	0	0	0	0	256935	313925	404062	832352	0	0	266701	335367	1.07215e+06	714081	798345
	Q16610	ECM1_HUMAN	Extracellular matrix protein 1 (Secretory component p85)	2.75131e+06	2.31261e+06	881895	1.36361e+06	372048	681358	990733	0	5.21186e+06	3.50741e+06	1.15031e+06	720169	1.31704e+06	0	1.23136e+06	1.14494e+06	1.90102e+06	1.12324e+06	596332	499206	1.23964e+06	1.54082e+06	1.92163e+06	1.5742e+06	3.31017e+06	583916	475173	0	465894	735281	5.77584e+06	1.94665e+06	5.14758e+06	1.01329e+07	7.2527e+06	1.77514e+06	1.59112e+06	1.72257e+06	1.67142e+06	1.30633e+06	1.47109e+06	1.15579e+06	855859	2.3405e+06	998787	1.52823e+06
	O94769	ECM2_HUMAN	Extracellular matrix protein 2 (Matrix glycoprotein SC1/ECM2)	174933	425773	0	0	166384	0	0	0	0	0	0	0	0	0	178732	0	0	0	201120	0	0	0	0	0	604619	0	0	0	0	0	0	0	0	0	0	628117	529346	560851	663705	0	0	414168	263633	686574	461536	541673
	Q8IWU5	SULF2_HUMAN	Extracellular sulfatase Sulf-2 (hSulf-2) (EC 3.1.6.-)	0	990761	0	0	313734	0	0	0	0	0	0	0	0	0	0	0	0	0	0	0	0	0	0	0	2.45176e+06	0	0	0	0	0	0	0	0	0	0	0	0	0	0	0	0	0	0	909028	672003	0
	P08294	SODE_HUMAN	Extracellular superoxide dismutase [Cu-Zn] (EC-SOD) (EC 1.15.1.1)	2.9987e+06	6.72216e+06	2.68574e+06	0	2.82799e+06	982358	3.79772e+06	973324	5.97738e+06	2.80913e+06	4.03482e+06	3.66811e+06	2.4307e+06	3.21795e+06	3.87802e+06	2.52701e+06	4.00283e+06	4.28893e+06	3.21393e+06	2.28238e+06	4.07325e+06	2.2964e+06	2.9034e+06	1.75511e+06	3.94003e+06	1.17091e+06	784283	729514	843464	975688	9.92786e+06	2.28878e+06	6.84257e+06	9.74698e+06	9.44154e+06	3.70951e+06	2.16633e+06	4.02288e+06	5.4699e+06	2.98406e+06	4.00622e+06	3.47454e+06	3.27356e+06	6.37596e+06	3.95545e+06	4.28959e+06
	P52907	CAZA1_HUMAN	F-actin-capping protein subunit alpha-1 (CapZ alpha-1)	975041	0	598042	0	259138	0	0	0	0	0	0	0	412543	0	0	285215	0	0	0	0	783335	0	0	2.22974e+06	0	0	0	0	0	0	2.50102e+06	0	4.03831e+06	0	0	0	0	0	0	0	0	0	0	0	0	0
	P47756	CAPZB_HUMAN	F-actin-capping protein subunit beta (CapZ beta)	1.37426e+06	0	0	0	375639	0	551648	0	0	0	0	0	672318	0	0	0	0	0	0	0	400270	1084228	2.94303e+06	3.807e+06	0	0	0	0	0	0	2.65901e+06	0	6.77582e+06	0	0	0	0	0	0	0	0	0	0	0	0	0
	Q16658	FSCN1_HUMAN	Fascin (55 kDa actin-bundling protein) (Singed-like protein) (p55)	0	0	0	0	0	0	0	0	0	0	0	0	0	0	0	0	0	0	0	0	551371	0	2.16416e+06	0	0	0	0	0	0	0	0	0	0	0	0	0	0	0	0	0	0	0	0	0	0	0
	Q01469	FABP5_HUMAN	Fatty acid-binding protein, epidermal (Epidermal-type fatty acid-binding protein) (E-FABP) (Fatty acid-binding protein 5) (Psoriasis-associated fatty acid-binding protein homolog) (PA-FABP)	834740	0	1.90498e+06	0	373756	0	1.48703e+06	0	0	0	0	0	0	0	0	0	0	0	0	0	0	831946	5.49102e+06	0	0	0	0	0	0	0	0	0	0	0	0	0	0	0	0	0	0	0	0	0	0	0
	Q86UX7	URP2_HUMAN	Fermitin family homolog 3 (Kindlin-3) (MIG2-like protein) (Unc-112-related protein 2)	0	0	0	0	0	0	0	0	0	0	0	0	0	0	0	0	0	0	0	0	0	0	0	1201887	0	0	0	0	0	0	0	0	0	0	0	0	0	0	0	0	0	0	0	0	0	0
	P02792	FRIL_HUMAN	Ferritin light chain (Ferritin L subunit)	0	0	1.482e+06	0	0	0	0	0	0	0	0	0	0	0	1.3023e+06	0	0	0	0	210584	0	0	0	0	0	0	0	0	0	0	0	0	0	0	0	0	0	0	0	0	0	0	0	0	0	0
	Q9UGM5	FETUB_HUMAN	Fetuin-B (16G2) (Fetuin-like protein IRL685) (Gugu)	1.40588e+06	565813	0	542634	0	0	0	0	0	2.16035e+06	0	2.09107e+06	1.55897e+06	0	2.07872e+06	0	1.73141e+06	783518	0	0	876971	950751	2.80311e+06	1.40297e+06	0	342441	0	0	0	0	0	953267	0	0	0	541120	347034	654644	1239703	578176	618922	412571	641199	654942	0	842532
	P02671	FIBA_HUMAN	Fibrinogen alpha chain [Cleaved into: Fibrinopeptide A; Fibrinogen alpha chain]	3.20648e+07	7.22273e+06	1.75416e+07	5.48165e+06	2.61207e+06	1.22147e+07	6.61596e+06	2.1977e+06	4.85135e+07	7.60887e+07	1.30147e+07	2.16068e+07	2.39169e+07	315611	1.83317e+07	1.88919e+07	3.48974e+07	4.02432e+07	1.76815e+06	1.24573e+07	5.43415e+07	1.20118e+07	2.21743e+07	3.67486e+06	1.322e+06	7.91102e+06	2.38156e+06	1.95329e+06	2.6828e+06	1.52098e+07	3.64545e+07	1.87672e+07	4.69352e+07	5.79493e+07	4.16061e+07	3.82382e+06	2.00394e+06	2.60511e+06	4.7188e+06	6.87065e+06	5.02318e+06	2.19919e+06	1.4385e+06	3.33421e+06	1.26774e+06	3.3289e+06
	P02675	FIBB_HUMAN	Fibrinogen beta chain [Cleaved into: Fibrinopeptide B; Fibrinogen beta chain]	5.18299e+07	8.84702e+06	2.26616e+07	6.86201e+06	2.02317e+06	1.6602e+07	8.74166e+06	3.95583e+06	1.29409e+07	8.34611e+07	2.01174e+07	3.0316e+07	2.99237e+07	375527	2.87982e+07	2.25875e+07	3.59961e+07	5.07033e+07	2.41172e+06	1.4768e+07	9.13419e+07	2.0162e+07	2.6208e+07	4.30101e+06	1.33483e+06	9.42099e+06	1.75107e+06	1.08489e+06	2.40384e+06	1.75763e+07	3.49645e+07	1.35517e+07	5.02771e+07	9.66926e+06	1.49157e+07	5.01359e+06	2.39301e+06	2522196	4.38472e+06	5.09219e+06	5.00564e+06	3.07005e+06	1.38773e+06	3.51263e+06	1.47835e+06	3.34949e+06
	P02679	FIBG_HUMAN	Fibrinogen gamma chain	6.43594e+07	7.75438e+06	3.01331e+07	1.14336e+07	2.19359e+06	1.87856e+07	1.02513e+07	4.01109e+06	1.59967e+07	8.86785e+07	2.95801e+07	3.45609e+07	2.87409e+07	342904	3.16814e+07	2.82266e+07	4.24595e+07	4.5203e+07	2.26316e+06	1.53052e+07	8.8074e+07	2.08096e+07	3.47894e+07	5.21273e+06	1.76627e+06	1.26591e+07	2.99719e+06	1.12267e+06	3.78826e+06	1.62871e+07	4.86967e+07	2.00435e+07	7.62768e+07	1.89061e+07	2.16923e+07	4.66528e+06	3.09729e+06	3.65349e+06	6.86834e+06	8.16835e+06	6.52005e+06	3.26931e+06	1.71302e+06	4.64104e+06	2.00984e+06	4.26596e+06
	P11362	FGFR1_HUMAN	Fibroblast growth factor receptor 1 (FGFR-1) (EC 2.7.10.1) (Basic fibroblast growth factor receptor 1) (BFGFR) (bFGF-R-1) (Fms-like tyrosine kinase 2) (FLT-2) (N-sam) (Proto-oncogene c-Fgr) (CD antigen CD331)	521192	860280	0	0	0	0	0	0	0	0	0	0	0	0	0	0	0	0	0	0	0	0	0	0	2.1783e+06	0	0	0	0	0	0	0	0	0	0	430860	356844	674656	0	0	0	600261	0	0	777332	1.26542e+06
	P21802	FGFR2_HUMAN	Fibroblast growth factor receptor 2 (FGFR-2) (EC 2.7.10.1) (K-sam) (KGFR) (Keratinocyte growth factor receptor) (CD antigen CD332)	0	995096	0	0	0	0	0	0	0	0	0	0	0	0	0	0	0	0	328825	0	0	0	0	0	0	0	0	0	0	0	0	0	2.08703e+06	0	0	1.29933e+06	790280	1.69704e+06	0	0	0	980205	0	0	415934	391548
	Q86WI1	PKHL1_HUMAN	Fibrocystin-L (Polycystic kidney and hepatic disease 1-like protein 1) (PKHD1-like protein 1)	1.87869e+06	0	0	1.12038e+06	603465	0	2.00625e+06	0	0	0	0	2.82053e+06	5.04031e+06	0	0	0	0	0	0	0	0	9.24694e+06	0	7.91737e+06	0	0	0	0	0	2.07799e+06	1.0667e+07	0	2.05228e+07	2.89653e+07	3.68612e+07	0	0	0	0	0	0	0	0	0	0	0
	Q14314	FGL2_HUMAN	Fibroleukin (Fibrinogen-like protein 2) (pT49)	698578	0	0	0	0	0	0	0	0	0	0	0	0	0	0	0	0	0	0	0	0	0	901009	0	0	0	0	0	0	0	0	0	1.18889e+06	0	0	0	0	0	0	0	0	0	0	0	0	0
	Q06828	FMOD_HUMAN	Fibromodulin (FM) (Collagen-binding 59 kDa protein) (Keratan sulfate proteoglycan fibromodulin) (KSPG fibromodulin)	0	1.05233e+06	0	0	0	0	0	0	0	0	0	0	0	0	0	0	0	0	483119	0	592736	0	0	0	1.47506e+06	0	0	0	0	612387	0	0	2.91198e+06	0	0	672943	600231	714416	803050	0	1.01616e+06	821821	819340	1.07654e+06	1.17289e+06	840613
	P02751	FINC_HUMAN	Fibronectin (FN) (Cold-insoluble globulin) (CIG) [Cleaved into: Anastellin; Ugl-Y1; Ugl-Y2; Ugl-Y3]	5.04215e+06	4.92543e+06	3.80469e+06	3.92327e+06	1.47222e+06	1.50174e+06	2.48281e+06	634932	1.11093e+07	6.70864e+06	2.76489e+06	6.80067e+06	4.06952e+06	162335	5.39512e+06	4.39398e+06	5.47294e+06	3.3806e+06	1.13945e+06	1.31561e+06	4.23617e+06	2.2695e+06	3.98548e+06	1.86885e+06	4.28567e+06	2.10102e+06	900428	642870	972200	3.1864e+06	9.06048e+06	3.83435e+06	7.7456e+06	1.28571e+07	1.13758e+07	2.53739e+06	1.89501e+06	2.56486e+06	3.94769e+06	2.94129e+06	2.65321e+06	2.68546e+06	1.74165e+06	4.15369e+06	2.40472e+06	2.79426e+06
	P23142	FBLN1_HUMAN	Fibulin-1 (FIBL-1)	6.05225e+06	4.04028e+06	1.18488e+06	915158	2.24805e+06	829979	1.88792e+06	244162	7.06708e+06	3.66225e+06	2.58349e+06	1.92967e+06	1.999e+06	765993	3.31291e+06	1.81685e+06	2.46129e+06	2.02783e+06	2.99325e+06	1.46585e+06	2.96369e+06	2.68624e+06	7.81071e+06	1.87678e+06	3.17275e+06	1.34038e+06	529350	451037	741684	2.14731e+06	7.15942e+06	4.50561e+06	1.4839e+07	1.4035e+07	8.08848e+06	4.38044e+06	4.37203e+06	7.28498e+06	3.23509e+06	2.74356e+06	1.72951e+06	4.76922e+06	1.71696e+06	3.62324e+06	2.39297e+06	2.69445e+06
	P98095	FBLN2_HUMAN	Fibulin-2 (FIBL-2)	664170	483919	0	0	189984	0	0	0	0	0	0	0	0	0	0	0	0	0	54422.8	0	211501	0	0	0	0	0	0	0	0	0	0	0	2.02908e+06	0	0	312184	268583	515240	0	0	0	277858	0	0	87968.7	140443
	Q9UBX5	FBLN5_HUMAN	Fibulin-5 (FIBL-5) (Developmental arteries and neural crest EGF-like protein) (Dance) (Urine p50 protein) (UP50)	1.79732e+06	1.82555e+06	0	0	929536	0	0	0	0	980002	0	0	0	0	0	0	0	0	612645	0	513545	0	2.11394e+06	0	1.81475e+06	0	0	0	0	1.01394e+06	0	2.37041e+06	2.1352e+06	0	0	1.38576e+06	1.11801e+06	1.88782e+06	2.31812e+06	0	0	1.58733e+06	765274	1.78844e+06	754544	1.34755e+06
	O00602	FCN1_HUMAN	Ficolin-1 (Collagen/fibrinogen domain-containing protein 1) (Ficolin-A) (Ficolin-alpha) (M-ficolin)	0	0	0	0	0	0	0	0	0	0	0	0	0	0	0	0	0	0	0	706659	0	0	0	0	0	0	0	0	0	0	0	0	0	0	0	0	0	0	0	0	0	0	0	0	0	0
	O75636	FCN3_HUMAN	Ficolin-3 (Collagen/fibrinogen domain-containing lectin 3 p35) (Collagen/fibrinogen domain-containing protein 3) (Hakata antigen)	0	0	0	668024	0	0	0	0	0	3.75636e+06	2.06063e+06	3.02831e+06	2.7362e+06	0	2.2845e+06	2.25581e+06	4.98265e+06	2.00778e+06	0	1.16106e+06	1.0367e+06	1.33899e+06	0	2.15146e+06	0	0	0	0	0	0	0	4.09029e+06	0	2.09992e+07	7.78702e+06	0	0	0	0	0	0	0	0	0	0	0
	P20930	FILA_HUMAN	Filaggrin	0	0	0	0	0	0	0	0	0	0	0	0	0	0	0	0	0	0	0	0	0	0	0	0	0	0	0	0	0	0	0	0	0	0	0	0	0	0	0	0	0	0	0	0	0	0
	Q5D862	FILA2_HUMAN	Filaggrin-2 (FLG-2) (Intermediate filament-associated and psoriasis-susceptibility protein) (Ifapsoriasin)	0	0	0	0	0	0	0	0	0	0	0	0	0	0	0	0	0	0	0	0	0	0	0	0	0	0	0	0	0	0	0	0	0	0	0	0	0	0	0	0	0	0	0	0	0	0
	P21333	FLNA_HUMAN	Filamin-A (FLN-A) (Actin-binding protein 280) (ABP-280) (Alpha-filamin) (Endothelial actin-binding protein) (Filamin-1) (Non-muscle filamin)	831774	0	663868	146494	236481	0	304804	0	0	1.82778e+06	0	1.16228e+06	632442	0	0	311629	451999	0	0	0	594707	449307	4.01042e+06	2.23718e+06	0	0	0	0	0	0	1.79879e+06	0	2.4731e+06	819540	0	0	0	0	0	0	0	0	0	0	0	0
	P30043	BLVRB_HUMAN	Flavin reductase (NADPH) (FR) (EC 1.5.1.30) (Biliverdin reductase B) (BVR-B) (EC 1.3.1.24) (Biliverdin-IX beta-reductase) (Green heme-binding protein) (GHBP) (NADPH-dependent diaphorase) (NADPH-flavin reductase) (FLR)	0	0	2.52531e+06	0	0	0	0	0	0	0	0	0	0	0	0	0	0	0	0	0	0	0	0	0	0	0	0	0	0	0	0	0	0	0	0	0	0	0	0	0	0	0	0	0	0	0
	P41439	FOLR3_HUMAN	Folate receptor gamma (FR-gamma) (Folate receptor 3)	0	0	0	1.79822e+06	0	0	0	0	0	0	0	0	6.9584e+06	0	0	0	0	0	0	0	0	0	0	0	0	0	0	0	0	0	0	0	0	0	0	0	0	0	0	0	0	0	0	0	0	0
	Q12841	FSTL1_HUMAN	Follistatin-related protein 1 (Follistatin-like protein 1)	3.32573e+06	1.00985e+06	469967	0	905363	283015	352093	0	0	0	431830	843790	756560	179285	1.17597e+06	495097	721945	585300	655279	374723	984948	430933	2.93859e+06	0	829039	0	69789.8	0	302504	1.63299e+06	4.9888e+06	1.17123e+06	5.33356e+06	3124776	797815	485866	572091	1.13583e+06	1270855	686441	551342	535633	575158	1.23081e+06	948130	774549
	O95633	FSTL3_HUMAN	Follistatin-related protein 3 (Follistatin-like protein 3) (Follistatin-related gene protein)	1.28778e+06	0	0	0	0	0	0	0	0	0	0	0	0	0	0	0	0	0	0	0	569525	0	1.83914e+06	0	0	0	0	0	0	0	0	914764	0	0	0	0	0	0	0	0	0	0	0	0	0	0
	Q6MZW2	FSTL4_HUMAN	Follistatin-related protein 4 (Follistatin-like protein 4)	0	161215	0	0	0	0	0	0	0	0	0	0	0	0	0	0	0	0	0	0	0	0	0	0	892766	0	0	0	0	0	0	0	0	0	0	318181	279674	500096	652567	0	0	297326	241653	225901	428970	498822
	Q13642	FHL1_HUMAN	Four and a half LIM domains protein 1 (FHL-1) (Skeletal muscle LIM-protein 1) (SLIM) (SLIM-1)	0	0	0	0	0	0	0	0	0	0	0	0	0	0	0	0	0	0	0	0	0	0	0	0	0	0	0	0	0	0	0	0	0	0	0	0	0	0	0	0	0	0	0	0	0	0
	P04075	ALDOA_HUMAN	Fructose-bisphosphate aldolase A (EC 4.1.2.13) (Lung cancer antigen NY-LU-1) (Muscle-type aldolase)	5.64667e+06	925451	5.06388e+06	1.07196e+06	1.48809e+06	638038	2.94565e+06	266963	0	3.62717e+06	1.38965e+06	3.5121e+06	2.4426e+06	233871	1.55384e+06	2.05265e+06	1.12482e+06	935580	219319	981077	2.45113e+06	1.67747e+06	1.08614e+07	8.25586e+06	1.32431e+06	0	491407	141205	292410	1.58459e+06	1.38594e+07	1.63415e+06	1.5559e+07	5.1858e+06	2.2277e+06	761574	734043	1.06146e+06	1.50908e+06	0	736581	781199	429914	757177	804417	800783
	P09972	ALDOC_HUMAN	Fructose-bisphosphate aldolase C (EC 4.1.2.13) (Brain-type aldolase)	1.3873e+06	1.06703e+06	1.6975e+06	0	324294	0	2.05149e+06	0	0	1.1176e+06	658784	0	886837	0	336658	611070	455872	0	198651	333040	868826	1.01498e+06	2.17306e+06	2.19222e+06	700173	0	227862	0	1.00368e+06	465073	2.04741e+06	0	2.82847e+06	0	0	396851	215417	1.01164e+06	574241	0	0	758326	291916	908744	801272	489351
	P09382	LEG1_HUMAN	Galectin-1 (Gal-1) (14 kDa laminin-binding protein) (HLBP14) (14 kDa lectin) (Beta-galactoside-binding lectin L-14-I) (Galaptin) (HBL) (HPL) (Lactose-binding lectin 1) (Lectin galactoside-binding soluble 1) (Putative MAPK-activating protein PM12) (S-Lac lectin 1)	1.01771e+06	904005	894698	0	0	0	484374	0	0	0	0	0	0	0	484257	0	1.28865e+06	0	140211	0	920014	471835	8.24206e+06	927408	0	0	0	0	0	886262	5.68815e+06	0	5.11891e+06	0	0	499622	292648	369377	0	0	0	318536	0	0	285185	0
	Q08380	LG3BP_HUMAN	Galectin-3-binding protein (Basement membrane autoantigen p105) (Lectin galactoside-binding soluble 3-binding protein) (Mac-2-binding protein) (MAC2BP) (Mac-2 BP) (Tumor-associated antigen 90K)	1.12852e+06	3.16756e+06	2.65014e+06	878597	1.66246e+06	983226	1.52528e+06	389451	6.44908e+06	3.67655e+06	3.0143e+06	1.68388e+06	2.07281e+06	1.20045e+06	1.47204e+06	1.56871e+06	1.81964e+06	1.40597e+06	1.71298e+06	725592	675930	853988	1669388	0	3.11324e+06	1.10731e+06	433798	375738	792835	2.19553e+06	9.32711e+06	1.32897e+06	1.50364e+06	1.92502e+06	0	909972	865951	1.03605e+06	3.2181e+06	2.31182e+06	2.03816e+06	982530	1.70855e+06	3.4543e+06	1.88918e+06	2.5855e+06
	P09104	ENOG_HUMAN	Gamma-enolase (EC 4.2.1.11) (2-phospho-D-glycerate hydro-lyase) (Enolase 2) (Neural enolase) (Neuron-specific enolase) (NSE)	0	0	2.05127e+06	0	526606	0	1.69547e+06	0	0	0	0	0	2.84604e+06	0	0	0	0	0	0	619671	2.76517e+06	3.09796e+06	808434	0	0	0	0	0	0	0	0	0	8.83282e+06	0	0	666107	214312	418471	662446	0	0	449970	187102	346195	385056	461810
	Q92820	GGH_HUMAN	Gamma-glutamyl hydrolase (EC 3.4.19.9) (Conjugase) (GH) (Gamma-Glu-X carboxypeptidase)	0	0	0	0	0	0	0	0	0	0	0	0	0	0	0	0	449829	0	0	0	0	0	0	0	0	0	0	0	0	0	0	0	0	0	0	0	0	1.51148e+06	0	0	0	0	0	0	0	0
	P17900	SAP3_HUMAN	Ganglioside GM2 activator (Cerebroside sulfate activator protein) (GM2-AP) (Sphingolipid activator protein 3) (SAP-3) [Cleaved into: Ganglioside GM2 activator isoform short]	2.56312e+06	5.52499e+06	1.40859e+06	0	1.30082e+06	548765	935804	0	0	2.34639e+06	1.74255e+06	0	955291	0	1.03909e+06	625355	1.4905e+06	947942	1.49246e+06	394649	1.88225e+06	638922	3.40903e+06	800097	9.07762e+06	902290	0	0	801638	2.00711e+06	8.26563e+06	1.96565e+06	6.55527e+06	6.22286e+06	2.79518e+06	3.45528e+06	1.97453e+06	2.75055e+06	3.66266e+06	3.02938e+06	1.6333e+06	3.06283e+06	2.09399e+06	5.65294e+06	4.08374e+06	4.32347e+06
	O00451	GFRA2_HUMAN	GDNF family receptor alpha-2 (GDNF receptor alpha-2) (GDNFR-alpha-2) (GFR-alpha-2) (GDNF receptor beta) (GDNFR-beta) (Neurturin receptor alpha) (NRTNR-alpha) (NTNR-alpha) (RET ligand 2) (TGF-beta-related neurotrophic factor receptor 2)	0	1.28675e+06	0	0	446981	0	0	0	0	0	0	0	0	0	0	0	0	0	0	0	0	0	0	0	1.4382e+06	0	0	0	0	0	0	0	0	0	0	600199	613396	519191	0	0	0	471909	0	0	0	0
	P06396	GELS_HUMAN	Gelsolin (AGEL) (Actin-depolymerizing factor) (ADF) (Brevin)	1.013e+07	1.5887e+07	6.20247e+06	5.55031e+06	6.14796e+06	2.2213e+06	3.99381e+06	987375	1.76362e+07	1.44547e+07	4.87025e+06	1.60997e+07	8.00726e+06	538399	6.17991e+06	6.70677e+06	7.06282e+06	4.26998e+06	5.63691e+06	1.94061e+06	7.16946e+06	4.61338e+06	1.34335e+07	1.04135e+07	9.90832e+06	2.89031e+06	1.1208e+06	748785	2.59417e+06	5.02016e+06	2.13848e+07	7.4927e+06	2.3366e+07	5.28849e+07	1.81982e+07	1.01057e+07	1.0873e+07	1.29599e+07	1.17484e+07	7.7193e+06	6.84154e+06	1.32034e+07	4.93931e+06	1.171e+07	7.06908e+06	8.89636e+06
	O60234	GMFG_HUMAN	Glia maturation factor gamma (GMF-gamma)	1.30913e+06	0	0	0	0	0	0	0	0	0	0	1.0551e+06	863231	0	0	533334	0	0	0	0	864830	815919	0	4.58829e+06	0	0	0	0	0	0	2057355	0	2.10233e+06	0	0	0	0	0	0	0	0	0	0	0	0	0
	P14136	GFAP_HUMAN	Glial fibrillary acidic protein (GFAP)	0	0	2.01665e+07	0	0	0	791837	0	0	0	0	0	0	0	947875	462476	5.96698e+06	3.86191e+06	0	858126	0	7.11594e+06	5.6937e+06	0	0	0	0	0	0	0	0	0	0	0	0	0	0	0	0	0	0	0	0	0	0	0
	Q6ZMI3	GLDN_HUMAN	Gliomedin [Cleaved into: Gliomedin shedded ectodomain]	0	0	0	0	0	0	0	0	0	0	0	0	0	0	0	0	0	0	0	0	0	0	0	0	0	0	0	0	0	0	0	0	0	0	0	0	0	0	0	0	0	0	106593	0	0	0
	P11413	G6PD_HUMAN	Glucose-6-phosphate 1-dehydrogenase (G6PD) (EC 1.1.1.49)	1.16565e+06	0	404697	488302	183812	0	497619	0	0	0	0	1.27943e+06	1.04148e+06	0	0	757415	0	0	0	0	1.28901e+06	698845	1.15298e+06	5.69215e+06	0	0	0	0	0	109083	2.6249e+06	0	1.84719e+06	0	0	0	0	0	0	0	0	0	0	0	0	0
	P06744	G6PI_HUMAN	Glucose-6-phosphate isomerase (GPI) (EC 5.3.1.9) (Autocrine motility factor) (AMF) (Neuroleukin) (NLK) (Phosphoglucose isomerase) (PGI) (Phosphohexose isomerase) (PHI) (Sperm antigen 36) (SA-36)	3.73727e+06	0	2.72581e+06	1.23861e+06	1.19872e+06	423499	2.19474e+06	0	1.09498e+06	1.45997e+06	670486	2.70872e+06	1.44958e+06	0	379119	1.02228e+06	1.20653e+06	107665	0	404278	1.45665e+06	1.13508e+06	3.907e+06	7.26182e+06	0	321158	553657	0	294608	776993	1.67185e+07	0	8.78732e+06	0	0	0	0	0	0	0	0	0	0	0	0	0
	P14314	GLU2B_HUMAN	Glucosidase 2 subunit beta (80K-H protein) (Glucosidase II subunit beta) (Protein kinase C substrate 60.1 kDa protein heavy chain) (PKCSH)	944121	661433	0	0	179191	0	0	0	0	0	0	0	0	0	0	0	0	0	340735	0	0	0	1.34017e+06	1.05675e+06	1.00667e+06	0	0	0	155651	0	1.47766e+06	0	918305	0	0	474472	342734	531814	1.17527e+06	0	0	428467	228952	375846	432974	486652
	P48058	GRIA4_HUMAN	Glutamate receptor 4 (GluR-4) (GluR4) (AMPA-selective glutamate receptor 4) (GluR-D) (Glutamate receptor ionotropic, AMPA 4) (GluA4)	0	202588	0	0	0	0	0	0	0	0	0	0	0	0	0	0	0	0	0	0	0	0	0	0	636150	0	0	0	0	0	0	0	0	0	0	392283	273774	641839	742711	0	0	412342	383177	614166	715433	650916
	Q16769	QPCT_HUMAN	Glutaminyl-peptide cyclotransferase (EC 2.3.2.5) (Glutaminyl cyclase) (QC) (sQC) (Glutaminyl-tRNA cyclotransferase) (Glutamyl cyclase) (EC)	1.18863e+06	1.02477e+06	0	0	574935	0	0	0	0	0	0	0	1.75921e+06	0	926159	1.0754e+06	2.833e+06	930339	696676	675405	1678160	1.77425e+06	0	0	1.44584e+06	0	0	0	0	0	4.03163e+06	601632	4.96704e+06	3.00664e+06	84541974	895046	1.02911e+06	1.28391e+06	1.23954e+06	0	0	849864	0	1.30376e+06	919330	1.25801e+06
	P35754	GLRX1_HUMAN	Glutaredoxin-1 (Thioltransferase-1) (TTase-1)	2.115e+06	0	0	0	438593	0	597981	0	0	0	0	1.66236e+06	1.06804e+06	0	0	522485	0	0	0	0	970944	436401	2.71084e+06	2.80602e+06	0	0	0	0	0	0	5.6207e+06	0	1.15322e+07	0	0	0	0	0	0	0	0	0	0	0	0	0
	P22352	GPX3_HUMAN	Glutathione peroxidase 3 (GPx-3) (GSHPx-3) (EC 1.11.1.9) (Extracellular glutathione peroxidase) (Plasma glutathione peroxidase) (GPx-P) (GSHPx-P)	5.89729e+06	1.74789e+06	5.13161e+06	1.75602e+06	1.35342e+06	1.89016e+06	2.643e+06	352567	11111729	5.60418e+06	5.22348e+06	5.42061e+06	4.26162e+06	934926	5.49288e+06	3.54892e+06	3.87859e+06	3.46929e+06	1.39946e+06	1.43353e+06	2.94374e+06	1.77502e+06	9.25493e+06	2.75681e+06	2.20154e+06	1.65954e+06	884934	614366	1.63188e+06	1.98745e+06	6.44621e+06	1.00847e+07	1.02346e+07	3.22646e+07	1.31409e+07	1.73434e+06	1.79256e+06	2.72817e+06	3.6169e+06	2.95467e+06	1.92406e+06	2.16401e+06	1.21901e+06	3.03308e+06	1.55269e+06	2.33368e+06
	P00390	GSHR_HUMAN	Glutathione reductase, mitochondrial (GR) (GRase) (EC 1.8.1.7)	0	0	0	0	413803	0	0	0	0	0	0	0	0	0	0	0	0	0	0	0	0	0	0	0	0	0	0	0	0	0	5.6447e+06	0	0	0	0	0	0	0	0	0	0	0	0	0	0	0
	P78417	GSTO1_HUMAN	Glutathione S-transferase omega-1 (GSTO-1) (EC 2.5.1.18) (Glutathione S-transferase omega 1-1) (GSTO 1-1) (Glutathione-dependent dehydroascorbate reductase) (EC 1.8.5.1) (Monomethylarsonic acid reductase) (MMA(V) reductase) (EC 1.20.4.2) (S-(Phenacyl)glutathione reductase) (SPG-R)	2.0345e+06	0	2.84571e+06	675626	886512	0	1.0377e+06	0	0	1828476	0	969505	1.46858e+06	0	407325	915862	0	0	0	218734	1.2273e+06	808188	5.69478e+06	5.88623e+06	0	0	0	0	0	880010	9.42483e+06	662788	8.7552e+06	2.6503e+06	0	0	0	0	0	0	0	0	0	0	0	0
	P09211	GSTP1_HUMAN	Glutathione S-transferase P (EC 2.5.1.18) (GST class-pi) (GSTP1-1)	4.38112e+06	0	3.72489e+06	1.00404e+06	645636	492804	3.33908e+06	0	1.51738e+06	1.18003e+06	898964	2.21113e+06	2.52452e+06	151808	1.00092e+06	1.68432e+06	2.10548e+06	568166	0	1.10851e+06	2.54248e+06	2.0288e+06	6.67452e+06	5.36676e+06	509880	0	486291	0	0	717289	5.04291e+06	1.30228e+06	8.39185e+06	4.95504e+06	0	209758	241482	223978	0	0	0	364966	0	0	0	227419
	P04406	G3P_HUMAN	Glyceraldehyde-3-phosphate dehydrogenase (GAPDH) (EC 1.2.1.12) (Peptidyl-cysteine S-nitrosylase GAPDH) (EC 2.6.99.-)	7.30163e+06	0	6.30172e+06	3.05306e+06	1.4276e+06	564188	2.78734e+06	354877	5.00526e+06	2.12286e+06	2.03914e+06	5.23574e+06	4.96918e+06	237346	2.26713e+06	3.7257e+06	5.036e+06	1117636	0	891398	2.93854e+06	3.86219e+06	1.33231e+07	2.04386e+07	0	699336	829104	0	283297	1.86187e+06	1.02153e+07	1.50848e+06	2.73409e+07	8.49106e+06	3.1947e+06	346199	285568	566826	843255	0	0	411117	0	0	736517	616042
	P06737	PYGL_HUMAN	Glycogen phosphorylase, liver form (EC 2.4.1.1)	519066	0	569568	0	230179	0	265714	0	0	0	178409	0	400739	0	0	411671	0	0	0	0	365243	218332	740210	1.9639e+06	0	0	0	0	0	0	2.79219e+06	0	2.05521e+06	0	0	0	0	0	0	0	0	0	0	0	0	0
	P46976	GLYG_HUMAN	Glycogenin-1 (GN-1) (GN1) (EC 2.4.1.186)	0	0	0	0	0	0	0	0	0	0	0	0	0	0	0	0	0	0	0	0	0	0	0	1.34101e+06	0	0	0	0	0	0	0	0	3.02258e+06	0	0	0	0	0	0	0	0	0	0	0	0	0
	P35052	GPC1_HUMAN	Glypican-1 [Cleaved into: Secreted glypican-1]	0	0	0	0	0	0	0	0	0	0	0	0	0	0	0	0	0	0	0	0	0	0	0	0	0	0	0	0	0	0	0	0	0	0	0	541633	295137	0	0	0	0	0	0	0	0	0
	Q8NBJ4	GOLM1_HUMAN	Golgi membrane protein 1 (Golgi membrane protein GP73) (Golgi phosphoprotein 2)	1.50833e+06	1.43946e+06	0	0	320287	0	0	0	0	656315	399511	0	0	0	0	0	0	210909	337475	0	467460	0	1.42346e+06	0	1.31007e+06	0	0	0	228412	1.03495e+06	1.76598e+06	293568	1.12146e+06	0	0	644640	714353	1.33541e+06	1.1675e+06	630980	561254	895065	493001	1.06809e+06	1.02563e+06	594642
	Q9H4G4	GAPR1_HUMAN	Golgi-associated plant pathogenesis-related protein 1 (GAPR-1) (Golgi-associated PR-1 protein) (Glioma pathogenesis-related protein 2) (GliPR 2)	0	0	0	0	0	0	0	0	0	0	0	0	457148	0	0	242102	0	0	0	0	0	276363	1.25818e+06	1.67982e+06	0	0	0	0	0	0	2797893	0	1.56752e+06	0	0	0	0	0	0	0	0	0	0	0	0	0
	P28676	GRAN_HUMAN	Grancalcin	1.35284e+06	0	1.00205e+06	1.46561e+06	287669	0	540835	0	0	0	0	741852	0	0	0	636886	0	0	0	0	698466	810019	0	4.17722e+06	0	0	0	0	0	0	3.4131e+06	0	3.39121e+06	0	0	0	0	0	0	0	0	0	0	0	0	0
	P28799	GRN_HUMAN	Granulins (Proepithelin) (PEPI) [Cleaved into: Acrogranin (Glycoprotein of 88 Kda) (GP88) (Glycoprotein 88) (Progranulin); Paragranulin; Granulin-1 (Granulin G); Granulin-2 (Granulin F); Granulin-3 (Granulin B); Granulin-4 (Granulin A); Granulin-5 (Granulin C); Granulin-6 (Granulin D); Granulin-7 (Granulin E)]	1.55549e+06	0	0	0	477812	0	331932	0	0	0	0	0	0	0	0	0	0	0	0	0	748861	316214	1.10931e+06	2.1628e+06	0	0	0	0	0	0	1399687	0	3.972e+06	0	0	0	0	0	0	0	0	0	0	0	0	0
	Q14393	GAS6_HUMAN	Growth arrest-specific protein 6 (GAS-6) (AXL receptor tyrosine kinase ligand)	0	0	0	0	0	0	0	0	0	0	0	0	0	0	0	0	0	0	0	0	0	0	0	0	0	0	0	0	0	0	0	0	0	0	0	0	221980	0	0	0	0	0	0	0	0	0
	P62993	GRB2_HUMAN	Growth factor receptor-bound protein 2 (Adapter protein GRB2) (Protein Ash) (SH2/SH3 adapter GRB2)	628341	0	0	0	0	0	287284	0	0	0	0	0	0	0	0	0	0	0	0	0	0	0	1.57938e+06	0	0	0	0	0	0	0	0	0	0	0	0	0	0	0	0	0	0	0	0	0	0	0
	P62826	RAN_HUMAN	GTP-binding nuclear protein Ran (Androgen receptor-associated protein 24) (GTPase Ran) (Ras-like protein TC4) (Ras-related nuclear protein)	0	0	0	0	0	0	0	0	0	0	0	0	813989	0	0	0	0	0	0	0	0	0	0	2.14376e+06	0	0	0	0	0	0	0	0	0	0	0	0	0	0	0	0	0	0	0	0	0	0
	Q9Y2T3	GUAD_HUMAN	Guanine deaminase (Guanase) (Guanine aminase) (EC 3.5.4.3) (Guanine aminohydrolase) (GAH) (p51-nedasin)	0	0	0	0	0	0	0	0	0	0	0	0	0	0	0	0	0	0	0	0	0	0	0	0	701760	0	0	0	0	0	0	0	0	0	0	0	0	0	0	0	0	0	0	0	0	0
	P04899	GNAI2_HUMAN	Guanine nucleotide-binding protein G(i) subunit alpha-2 (Adenylate cyclase-inhibiting G alpha protein)	0	0	0	0	0	0	0	0	0	0	0	0	0	0	0	0	0	0	0	0	0	482009	0	3.18188e+06	0	0	0	0	0	0	0	0	0	0	0	0	0	0	0	0	0	0	0	0	0	0
	P00738	HPT_HUMAN	Haptoglobin (Zonulin) [Cleaved into: Haptoglobin alpha chain; Haptoglobin beta chain]	2.89069e+08	2.89148e+07	4.90002e+07	5.48729e+07	3.36714e+07	8.93381e+07	8.23559e+07	2.81126e+07	2.42435e+09	1.93346e+08	9.22356e+07	1.57142e+08	210732287	3.99808e+06	1.91229e+08	1.04069e+08	4.02076e+08	1.51406e+08	1.70179e+07	1.41001e+08	1.54858e+08	1.64335e+08	3.24535e+08	1.33166e+08	9.47148e+06	8.28009e+07	2.77307e+07	3.90088e+07	6.92867e+07	8.06225e+07	3.18265e+08	2.75619e+08	3.42673e+08	3.67208e+09	8.87905e+08	1.37671e+07	1.42509e+07	2.84443e+07	5.96134e+07	2.05847e+07	3.0293e+07	1.37242e+07	3.80735e+06	2.45802e+07	1.5882e+07	9.30134e+06
	P00739	HPTR_HUMAN	Haptoglobin-related protein	7.24581e+07	0	2.04646e+06	1.30186e+06	0	1.50739e+06	2.04053e+06	5.99224e+07	1.04818e+07	2087760	0	3.01202e+08	1.43154e+08	0	7.87104e+06	3.85286e+07	1.75402e+08	7.48491e+07	0	7.02446e+07	8.02745e+07	4.10354e+07	6.65162e+06	3.18182e+06	0	0	0	0	401160	55378983	3.12155e+08	6.66101e+06	2.26391e+06	2.59209e+07	7.32651e+06	0	0	0	8.90937e+07	0	0	0	0	3.01505e+07	0	0
	P11142	HSP7C_HUMAN	Heat shock cognate 71 kDa protein (Heat shock 70 kDa protein 8) (Lipopolysaccharide-associated protein 1) (LAP-1) (LPS-associated protein 1)	1.03735e+06	386917	1.50929e+06	0	466718	0	918244	0	0	0	0	0	690893	0	0	0	0	0	0	186725	767929	869307	2.83114e+06	2.68794e+06	0	0	0	0	0	659352	2.61605e+06	0	2.26034e+06	0	0	0	0	0	0	0	0	0	0	0	0	0
	P04792	HSPB1_HUMAN	Heat shock protein beta-1 (HspB1) (28 kDa heat shock protein) (Estrogen-regulated 24 kDa protein) (Heat shock 27 kDa protein) (HSP 27) (Stress-responsive protein 27) (SRP27)	0	0	1.17235e+06	0	0	0	0	0	0	0	0	0	0	0	0	0	0	0	0	0	0	0	0	0	0	0	0	0	0	0	0	0	0	0	0	0	0	0	0	0	0	0	0	0	0	0
	P07900	HS90A_HUMAN	Heat shock protein HSP 90-alpha (Heat shock 86 kDa) (HSP 86) (HSP86) (Lipopolysaccharide-associated protein 2) (LAP-2) (LPS-associated protein 2) (Renal carcinoma antigen NY-REN-38)	1.77373e+06	0	1.63701e+06	864315	550428	0	927928	0	0	0	0	0	684558	0	0	0	388791	0	0	528895	827970	625638	6.70109e+06	1.39514e+06	0	0	0	0	0	695351	4.9178e+06	0	5.34355e+06	0	0	0	0	0	0	0	0	0	0	0	0	0
	P08238	HS90B_HUMAN	Heat shock protein HSP 90-beta (HSP 90) (Heat shock 84 kDa) (HSP 84) (HSP84)	1.17248e+06	0	788646	0	0	0	302110	0	0	0	0	0	966151	0	0	0	0	0	0	0	0	0	6.21135e+06	1.19136e+06	0	0	0	0	0	766590	3.29123e+06	0	3.03591e+06	0	0	0	0	0	0	0	0	0	0	0	0	0
	P14317	HCLS1_HUMAN	Hematopoietic lineage cell-specific protein (Hematopoietic cell-specific LYN substrate 1) (LckBP1) (p75)	0	0	0	0	0	0	0	0	0	0	0	0	271039	0	0	0	0	0	0	0	0	0	0	0	0	0	0	0	0	0	0	0	0	0	0	0	0	0	0	0	0	0	0	0	0	0
	P69905	HBA_HUMAN	Hemoglobin subunit alpha (Alpha-globin) (Hemoglobin alpha chain)	883945	1.93004e+06	2.91319e+08	4.40898e+06	1.3256e+06	6.94789e+06	9.05571e+06	1.19485e+06	0	1.44665e+08	3.22813e+07	2.65172e+06	1.41358e+07	5.55965e+06	1.02775e+07	9.22693e+06	2.21465e+06	4.48648e+06	447499	4.576e+06	2.85221e+06	2.57654e+06	0	0	857934	9.08034e+06	9.85997e+06	5.51836e+06	1.652e+06	9.02858e+06	3.10597e+07	0	0	0	6.85135e+06	989253	3.6525e+06	0	0	1.72326e+07	0	1.05167e+06	617103	393118	333786	1.01723e+06
	P68871	HBB_HUMAN	Hemoglobin subunit beta (Beta-globin) (Hemoglobin beta chain) [Cleaved into: LVV-hemorphin-7; Spinorphin]	0	2.12085e+06	1.63069e+08	4.17174e+06	530514	1.13204e+07	2.14544e+07	964148	0	3.86238e+08	2.00596e+08	1.13687e+06	2.23238e+07	9.34774e+06	3.48945e+07	1.49859e+07	1.04264e+06	3.42787e+06	142127	7.29519e+06	3.81638e+06	4.08392e+06	0	0	1.70182e+06	2.12723e+07	3.45905e+07	1.67442e+07	400034	4.61338e+06	7.7013e+07	4.96515e+06	0	0	1.36152e+07	1.05631e+06	3.34451e+06	0	1.7398e+06	1.67906e+07	745788	814600	112525	821570	100308	1.07394e+06
	P02042	HBD_HUMAN	Hemoglobin subunit delta (Delta-globin) (Hemoglobin delta chain)	0	0	6.00354e+07	1.16091e+06	0	1216378	3.09858e+06	0	0	3.27356e+07	3.22813e+07	0	2.29298e+06	708830	2.45968e+06	2.24096e+06	0	0	0	1.99339e+06	0	0	0	0	0	2.76663e+06	3.02736e+06	1.28679e+06	0	0	0	0	0	0	0	0	1.10559e+06	0	0	3.46451e+06	0	0	0	0	0	0
	P02790	HEMO_HUMAN	Hemopexin (Beta-1B-glycoprotein)	1.37615e+08	3.1734e+07	8.58319e+07	5.18262e+07	1.84047e+07	4.61623e+07	5.36302e+07	9.90823e+06	4.82405e+08	1.41048e+08	9.81531e+07	1.75935e+08	1.30739e+08	9.94124e+06	1.14896e+08	8.51026e+07	1.29043e+08	7.96631e+07	3.58369e+07	4.96804e+07	7.83113e+07	7.19402e+07	2.7715e+08	6.82463e+07	1.7718e+07	2.75259e+07	1.42074e+07	1.45595e+07	1.89271e+07	5.2511e+07	1.0949e+08	1.32831e+08	1.55378e+08	8.25107e+08	4.15864e+08	3.20259e+07	1.91913e+07	4.82591e+07	4.0763e+07	5.27155e+07	3.63681e+07	7.20157e+07	1.97398e+07	4.13467e+07	2.25587e+07	3.52505e+07
	Q8IZP7	H6ST3_HUMAN	Heparan-sulfate 6-O-sulfotransferase 3 (HS6ST-3) (EC 2.8.2.-)	0	251919	0	0	0	0	0	0	0	0	0	0	0	0	0	0	0	0	0	0	0	0	0	0	418697	0	0	0	0	0	0	0	0	0	0	172057	193778	0	0	0	0	96207.1	0	0	0	260029
	P05546	HEP2_HUMAN	Heparin cofactor 2 (Heparin cofactor II) (HC-II) (Protease inhibitor leuserpin-2) (HLS2) (Serpin D1)	3.10531e+06	2.52397e+06	3.31139e+06	3.60282e+06	971556	1.1604e+06	1.67334e+06	184429	2.09244e+07	3.96719e+06	2.20458e+06	7.62181e+06	4.45458e+06	233017	6.78191e+06	4.56095e+06	6.06542e+06	2.24607e+06	1.42503e+06	1.43376e+06	2.06978e+06	1.96093e+06	2.78794e+06	3.19338e+06	2.66601e+06	861184	514381	395725	660615	1.69621e+06	6.36307e+06	4.06118e+06	3.4487e+06	4.94187e+07	1.13364e+07	2.34322e+06	1.43504e+06	2.6019e+06	5.00961e+06	4.3464e+06	3.68079e+06	1.8036e+06	2.23563e+06	4.83948e+06	2.38242e+06	4.4906e+06
	Q04756	HGFA_HUMAN	Hepatocyte growth factor activator (HGF activator) (HGFA) (EC 3.4.21.-) [Cleaved into: Hepatocyte growth factor activator short chain; Hepatocyte growth factor activator long chain]	705096	0	462680	551441	0	0	0	0	2.43974e+06	954090	0	1.48551e+06	675813	0	874249	604316	553220	312391	0	0	455050	439429	1.51244e+06	471802	0	0	0	0	0	0	0	635695	544333	9.54816e+06	2.52321e+06	591511	0	0	0	0	0	0	0	0	0	0
	P26927	HGFL_HUMAN	Hepatocyte growth factor-like protein (Macrophage stimulatory protein) (Macrophage-stimulating protein) (MSP) [Cleaved into: Hepatocyte growth factor-like protein alpha chain; Hepatocyte growth factor-like protein beta chain]	0	0	0	0	0	0	0	0	0	0	0	0	0	0	0	0	0	0	0	0	0	0	0	0	0	0	0	0	0	0	0	0	0	0	0	0	0	0	0	0	0	0	0	0	0	0
	P51858	HDGF_HUMAN	Hepatoma-derived growth factor (HDGF) (High mobility group protein 1-like 2) (HMG-1L2)	0	0	0	0	0	0	0	0	0	0	0	0	0	0	0	0	0	0	0	0	0	0	0	0	0	0	0	0	0	0	0	0	2.61911e+06	0	0	0	0	0	0	0	0	0	0	0	0	0
	P61978	HNRPK_HUMAN	Heterogeneous nuclear ribonucleoprotein K (hnRNP K) (Transformation up-regulated nuclear protein) (TUNP)	641785	0	0	0	0	0	0	0	0	0	0	0	973847	0	0	0	0	0	0	0	661758	462664	2.31366e+06	2.79356e+06	0	0	0	0	0	0	0	0	1.44921e+06	0	0	0	0	0	0	0	0	0	0	0	0	0
	P14866	HNRPL_HUMAN	Heterogeneous nuclear ribonucleoprotein L (hnRNP L)	0	0	0	0	0	0	0	0	0	0	0	0	0	0	0	0	0	0	0	0	0	0	0	681192	0	0	0	0	0	0	0	0	0	0	0	0	0	0	0	0	0	0	0	0	0	0
	P22626	ROA2_HUMAN	Heterogeneous nuclear ribonucleoproteins A2/B1 (hnRNP A2/B1)	0	0	0	0	0	0	1.12713e+06	0	0	0	0	1.5305e+06	1.70078e+06	0	0	0	0	0	0	0	781380	856254	0	1.7576e+06	0	0	0	0	0	0	0	0	0	0	0	0	0	0	0	0	0	0	0	0	0	0
	P52790	HXK3_HUMAN	Hexokinase-3 (EC 2.7.1.1) (Hexokinase type III) (HK III)	1.39905e+06	156568	445118	352783	190720	0	401298	0	2.08378e+06	0	0	732409	543226	0	0	397588	0	0	0	0	673968	431599	1.09029e+06	3.12496e+06	0	0	0	0	0	303767	1.78759e+06	0	2.67739e+06	2.02487e+07	506651	0	0	0	0	0	0	0	0	0	0	0
	P09429	HMGB1_HUMAN	High mobility group protein B1 (High mobility group protein 1) (HMG-1)	0	0	0	0	0	0	0	0	0	0	0	0	0	0	0	0	0	0	0	0	1.35978e+06	0	0	0	0	0	0	0	0	0	0	0	0	0	0	0	0	0	0	0	0	0	0	0	0	0
	P26583	HMGB2_HUMAN	High mobility group protein B2 (High mobility group protein 2) (HMG-2)	1.30079e+06	0	0	861590	788437	0	825553	0	0	0	0	2.02993e+06	486170	0	0	0	0	0	0	0	1.59815e+06	1.1937e+06	0	3.58113e+06	0	0	0	0	0	0	3.06545e+06	0	3.67724e+06	0	0	0	0	0	0	0	0	0	0	0	0	0
	P04196	HRG_HUMAN	Histidine-rich glycoprotein (Histidine-proline-rich glycoprotein) (HPRG)	7.59597e+06	2.82839e+06	5.92699e+06	5.01959e+06	654656	2.61657e+06	4.56808e+06	507349	2.22038e+07	1.09842e+07	3.66619e+06	8.85403e+06	1.08575e+07	293297	7.05339e+06	1.00427e+07	1.13585e+07	6.05074e+06	1.90005e+06	1.8266e+06	8.69344e+06	7.06649e+06	1.60256e+07	2.39853e+06	1.1212e+06	1.74309e+06	724439	737008	1.12824e+06	2.4714e+06	8.93612e+06	7.34923e+06	9.52139e+06	7.64959e+07	1.97393e+07	3.07067e+06	2.28835e+06	3.83289e+06	6.53541e+06	5.70306e+06	3.08727e+06	2.75604e+06	870348	4.23596e+06	2.35194e+06	2.95987e+06
	P16401	H15_HUMAN	Histone H1.5 (Histone H1a) (Histone H1b) (Histone H1s-3)	6.56419e+06	0	2.00568e+06	0	2.7505e+06	0	1.89759e+06	0	0	0	0	1.39543e+06	1.28044e+06	0	0	3.14542e+06	406919	0	0	242272	1757421	3.34033e+06	0	1.56004e+07	0	0	0	0	0	0	1.06868e+07	0	3.30531e+07	0	0	0	0	0	0	0	0	0	0	0	0	0
	Q71DI3	H32_HUMAN	Histone H3.2 (Histone H3/m) (Histone H3/o)	0	0	0	0	0	0	0	0	0	0	0	0	0	0	0	1.03643e+06	0	0	0	0	0	0	0	0	0	0	0	0	0	0	0	0	0	0	0	0	0	0	0	0	0	0	0	0	0	0
	P62805	H4_HUMAN	Histone H4	3.83836e+06	0	1.93667e+07	9.48911e+06	3.37235e+06	835330	3.92715e+06	0	1.5992e+07	1680235	6954622	8.04033e+06	9.07542e+06	0	2.10239e+06	1.19735e+07	6.77797e+06	1.16491e+06	0	3.47746e+06	1.10069e+06	7.70569e+06	4.28487e+06	3.7725e+07	0	2.11274e+06	492630	692060	0	1.17824e+06	5.63253e+07	0	1.51292e+07	1.16036e+07	1.72694e+07	0	0	0	2.9888e+06	0	1.14494e+06	0	0	0	0	0
	Q86YZ3	HORN_HUMAN	Hornerin	0	0	0	0	0	0	0	0	0	0	0	0	0	0	0	0	0	0	73153.4	0	0	0	0	0	209714	0	0	0	0	0	0	0	0	0	0	0	0	0	0	691111	0	80123.5	0	0	0	0
	Q14520	HABP2_HUMAN	Hyaluronan-binding protein 2 (EC 3.4.21.-) (Factor VII-activating protease) (Factor seven-activating protease) (FSAP) (Hepatocyte growth factor activator-like protein) (Plasma hyaluronan-binding protein) [Cleaved into: Hyaluronan-binding protein 2 50 kDa heavy chain; Hyaluronan-binding protein 2 50 kDa heavy chain alternate form; Hyaluronan-binding protein 2 27 kDa light chain; Hyaluronan-binding…	3.43572e+06	0	984065	1.27857e+06	0	541935	957133	0	1.66739e+07	2.55512e+06	931866	1.9276e+06	1.71632e+06	0	2.55764e+06	1.13909e+06	3.35066e+06	1.38723e+06	464539	354748	1.54632e+06	1.58799e+06	6.15723e+06	1.11021e+06	0	401152	0	0	195882	690780	2.62943e+06	2.95323e+06	1.75169e+06	2.09926e+07	1.09435e+07	639447	359089	628553	639521	722637	0	391733	0	714127	146728	735003
	P00492	HPRT_HUMAN	Hypoxanthine-guanine phosphoribosyltransferase (HGPRT) (HGPRTase) (EC 2.4.2.8)	0	0	0	0	180978	0	0	0	0	0	0	0	0	0	0	0	0	0	0	0	0	0	653675	0	0	0	0	0	0	0	1.12624e+06	0	2.10927e+06	0	0	0	0	0	0	0	0	0	0	0	0	0
	Q9Y4L1	HYOU1_HUMAN	Hypoxia up-regulated protein 1 (150 kDa oxygen-regulated protein) (ORP-150) (170 kDa glucose-regulated protein) (GRP-170)	0	0	0	0	0	0	0	0	0	0	0	0	0	0	0	0	0	0	0	0	0	0	0	0	0	0	0	0	0	0	0	0	0	0	0	0	117963	0	0	0	0	0	0	0	234888	0
	O75144	ICOSL_HUMAN	ICOS ligand (B7 homolog 2) (B7-H2) (B7-like protein Gl50) (B7-related protein 1) (B7RP-1) (CD antigen CD275)	814015	785958	468305	0	0	0	306528	0	0	742435	566091	0	309545	0	285092	0	190789	246788	392507	0	0	0	1.44453e+06	0	1.20548e+06	215436	0	0	0	0	1.00446e+06	890403	1.6367e+06	0	0	680141	753800	1.25393e+06	1.09868e+06	1.01923e+06	0	788588	0	765846	535814	499814
	P22304	IDS_HUMAN	Iduronate 2-sulfatase (EC 3.1.6.13) (Alpha-L-iduronate sulfate sulfatase) (Idursulfase) [Cleaved into: Iduronate 2-sulfatase 42 kDa chain; Iduronate 2-sulfatase 14 kDa chain]	0	0	0	0	0	0	0	0	0	0	0	0	0	0	0	0	0	0	0	0	0	0	0	0	0	0	0	0	0	0	0	0	0	0	0	429991	731388	790472	0	0	0	395470	0	0	458863	475724
	P01876	IGHA1_HUMAN	Ig alpha-1 chain C region	1.81981e+08	4.21833e+07	1.71462e+08	3.88337e+07	3.60885e+07	6.83853e+07	8.71635e+07	2.49148e+07	4.39215e+08	7.84888e+07	9.18115e+07	1.14466e+08	1.35504e+08	1.27659e+06	2.00716e+08	1.86634e+08	1.48607e+08	1.98366e+08	1.04697e+07	4.92378e+07	1.68699e+08	0	4.76747e+07	6.15237e+07	1.38974e+07	3.22392e+07	2.04161e+07	1.46252e+07	2.06004e+07	0	2.49526e+08	8.828e+07	3.47724e+08	3.75424e+09	2.09031e+09	2.14035e+07	7.45844e+06	4.51198e+07	3.95079e+07	5.00095e+07	2.87344e+07	2.88141e+07	1.20829e+07	1.75651e+07	1.47443e+07	7.61346e+06
	P01877	IGHA2_HUMAN	Ig alpha-2 chain C region	4.05518e+06	3.34885e+06	9.19001e+07	7.65455e+06	1.27656e+06	1.40373e+07	6.81269e+06	2.47127e+06	2.34134e+08	6.68525e+07	1.00354e+08	2.80827e+07	3.31039e+07	0	2.53503e+07	4.32358e+07	1.60894e+07	1.75741e+07	1.34321e+06	3.09995e+06	1.82716e+07	0	0	3.03652e+06	9.8128e+06	4.62273e+06	2.98207e+07	2.98791e+06	2.23077e+07	0	1.64112e+07	5.30888e+07	6.17946e+07	1.81158e+08	2.91129e+08	0	0	4.28037e+06	2.26135e+06	5.06109e+06	4.92044e+06	4.02931e+06	1.04107e+06	2.16171e+06	0	0
	P01880	IGHD_HUMAN	Ig delta chain C region	0	0	2.30109e+06	0	0	999775	2.94405e+06	528461	6.55118e+06	2.34941e+06	2.86507e+06	0	836240	0	698980	7.6616e+06	3.40158e+06	518259	249080	418017	0	7.90259e+06	0	0	0	0	196472	737117	625048	0	0	3.08561e+06	2.56769e+07	2.33276e+07	4.112e+07	496408	0	0	0	1.00971e+06	0	383411	0	0	883626	568186
	P01857	IGHG1_HUMAN	Ig gamma-1 chain C region	4.14806e+08	1.73515e+08	2.2073e+08	1.45981e+08	3.61276e+07	1.1926e+08	2.46351e+08	4.44957e+07	8.16986e+08	2.64699e+08	2.05697e+08	5.73572e+08	3.70113e+08	3.39265e+07	4.05644e+08	3.74579e+08	5.33467e+08	3.37466e+08	4.23943e+07	9.67284e+07	1.63473e+08	3.35751e+08	2.48224e+08	1.02448e+08	3.10983e+07	7.31036e+07	6.69152e+07	3.85153e+07	5.71411e+07	1.6167e+08	918756056	4.40063e+08	3.35121e+08	3.54868e+09	8.60506e+08	6.52395e+07	3.06569e+07	4.94174e+07	1.12638e+08	4.47155e+08	1.54888e+08	8.34545e+07	4.01181e+07	1.77901e+08	7.89702e+07	1.32012e+08
	P01859	IGHG2_HUMAN	Ig gamma-2 chain C region	9.2125e+07	3.38383e+07	1.41399e+08	1.0344e+08	1.99503e+07	4.91217e+07	4.20326e+07	1.81633e+07	4.43581e+08	1.47018e+08	164575795	1.14529e+08	1.25097e+08	8.00865e+06	5.60133e+07	6.46394e+07	1.17147e+08	9.10542e+07	1.74774e+07	3.07222e+07	7.61831e+07	7.71184e+07	4.67358e+07	3.41816e+07	1.16328e+07	7.2458e+07	55357425	3.48176e+07	2.43196e+07	4.76528e+07	2.42654e+08	5.49785e+07	1.47994e+08	6.27055e+08	4.09054e+08	1.92855e+07	2.96748e+07	2.42019e+07	9.50944e+07	7.24008e+07	6.11774e+07	2.74367e+07	2.39362e+07	5.17797e+07	2.26338e+07	4.24937e+07
	P01860	IGHG3_HUMAN	Ig gamma-3 chain C region (HDC) (Heavy chain disease protein)	9.36329e+07	1.17746e+07	2.55163e+07	1.75154e+07	4.80356e+06	3.77509e+07	2.8225e+07	6.99352e+06	1.33044e+08	1.01569e+08	3.9684e+07	2.05375e+08	3.33773e+07	4.16249e+06	3.49585e+07	5.89643e+07	1.29374e+08	5.75858e+07	4.88787e+06	1.04171e+07	2.37171e+07	5.54997e+07	4.34478e+07	2.75121e+07	1.42526e+06	7.41984e+06	6.32351e+06	3.72232e+06	3.46548e+06	1.55547e+07	1.5816e+08	5.2916e+09	3.51149e+08	9.47914e+07	2.85106e+08	9.61297e+07	1.2518e+07	1.57603e+07	1.71908e+07	75413218	1.19467e+07	6.80397e+07	7.41914e+06	1.2796e+07	9.9291e+06	1.8005e+07
	P01861	IGHG4_HUMAN	Ig gamma-4 chain C region	3344845	1.75266e+07	2.15995e+07	1.83214e+07	7.89164e+06	1.77479e+07	2.19452e+07	5.7989e+06	4.76027e+07	2.06773e+07	5.50625e+07	3.56107e+07	2.38431e+07	4.25622e+06	1.74167e+07	2.75539e+07	6.77722e+07	3.44944e+07	6.02889e+06	2.87835e+06	4.13709e+07	7.24733e+07	5.1499e+06	6.19864e+07	1.53363e+06	1.09375e+07	1.16518e+07	7.49693e+06	1.10029e+07	1.55089e+07	1.19972e+08	1.26507e+07	1.60278e+07	3.43594e+08	1.126e+08	5.46762e+06	1.28834e+07	4.01418e+06	1.26929e+07	1.75617e+07	1.409e+07	8.21357e+06	2.99937e+06	1.64538e+07	7.51126e+06	4.36189e+06
	P01834	IGKC_HUMAN	Ig kappa chain C region	9.44141e+07	2.85759e+07	1.68162e+08	8.98106e+07	1.44188e+07	4.84522e+07	1.14989e+08	1.27533e+07	2.4287e+08	1.68494e+08	2.17467e+08	1.24313e+08	1.55315e+08	1.54906e+07	1.4592e+08	2.00426e+08	1.88063e+08	1.89621e+08	2.44542e+07	5.48063e+07	5.75498e+07	6.2927e+07	5.89137e+07	3.51856e+07	8.63465e+06	7.23452e+07	3.27293e+07	2.38898e+07	2.51386e+07	3.67106e+07	2.93847e+08	2.27929e+08	8.05273e+07	3.76152e+08	1.56773e+08	1.12567e+07	6.6129e+06	1.17997e+07	3.70894e+07	9.57926e+07	4.12501e+07	1.00925e+07	2.30563e+07	6.56028e+07	3.06773e+07	4.30832e+07
	P0CG05	LAC2_HUMAN	Ig lambda-2 chain C regions	0	0	0	0	0	0	0	0	0	0	0	0	0	0	0	0	0	0	0	0	0	0	0	0	0	0	0	0	0	0	0	0	0	0	0	0	0	0	0	993682	0	0	0	0	0	0
	P0CG06	LAC3_HUMAN	Ig lambda-3 chain C regions	0	0	0	2.26101e+06	0	0	0	0	0	2.70351e+06	0	0	0	0	0	0	0	0	0	0	0	0	0	0	0	0	0	0	0	0	7.14466e+06	0	0	0	0	0	0	0	0	1.94635e+06	0	0	0	0	576925	0
	P01871	IGHM_HUMAN	Ig mu chain C region	8.81706e+07	3.6305e+06	8.84436e+06	2.9192e+07	649959	7.19274e+06	5.47623e+06	3.62656e+06	1.39752e+08	1.36782e+07	1.31609e+07	6.44626e+07	4.48642e+07	413084	1.68979e+07	2.62319e+07	3.04047e+07	1.82277e+07	469454	5.10847e+06	1.27727e+07	1.1027e+07	2.40957e+06	1.85341e+07	258981	1.36492e+07	6.23871e+06	2.23817e+06	5.27656e+06	3.80266e+06	3.1416e+07	3.29254e+07	2.72934e+07	1.05914e+08	7.45584e+07	1.92307e+06	1.04039e+06	6.05972e+06	4.59072e+06	3.54132e+07	6.44044e+06	2.33406e+06	864367	1.55737e+06	408638	1.81827e+06
	P04220	MUCB_HUMAN	Ig mu heavy chain disease protein (BOT)	1.64172e+08	3.59387e+06	1.56315e+07	3.72836e+07	0	9.29028e+06	7.5744e+06	0	1.53698e+08	1.76251e+07	2.30642e+07	1.69054e+07	40528616	3.96273e+06	1.7873e+07	3.56144e+07	1.57521e+07	2.25294e+07	0	6.25543e+06	1.57902e+07	2.29089e+07	1.08723e+07	1.50452e+07	7.00081e+06	1.53094e+07	4.74784e+06	0	0	0	2.89504e+07	6.13647e+07	3.17791e+07	2.61279e+07	9.41733e+07	0	0	7.0352e+06	0	3.89861e+07	1.01156e+07	2.17035e+06	0	0	0	0
	Q9Y6R7	FCGBP_HUMAN	IgGFc-binding protein (Fcgamma-binding protein antigen) (FcgammaBP)	2.34371e+06	2.65197e+06	1.27431e+06	145755	2.3076e+06	1.63811e+06	501840	782325	3.37467e+06	4.43955e+06	1.48641e+06	2.57695e+06	747844	386731	1.8675e+06	312325	877402	734329	2.62402e+06	387553	861335	461453	3.71865e+06	193248	1.34352e+06	6.32027e+06	527511	313475	2.29392e+06	816608	3.34256e+07	940248	2.73485e+07	5.05336e+06	1.55309e+07	891555	1.03099e+06	2.31581e+06	4.5541e+06	3.19146e+06	3.44839e+06	793344	633829	1.55761e+06	988010	1.11419e+06
	P01591	IGJ_HUMAN	Immunoglobulin J chain (Joining chain of multimeric IgA and IgM)	1.58878e+07	1.88869e+06	4.2782e+06	6.77501e+06	0	4.88092e+06	2.64938e+06	1.81405e+06	4.11682e+07	7.54611e+06	5.76863e+06	1.87788e+07	1.10826e+07	0	5.30883e+06	1.11912e+07	1.39128e+07	7.26569e+06	0	2.78524e+06	4.52469e+06	2.90791e+06	0	5.19988e+06	0	2.99233e+06	1.75398e+06	696018	1.78802e+06	0	1.56214e+07	1.00309e+07	2.11882e+07	1.08257e+08	9.01201e+07	794445	527196	2.42087e+06	1.84725e+06	8.52263e+06	2.96573e+06	396100	403122	1.4661e+06	0	846992
	P15814	IGLL1_HUMAN	Immunoglobulin lambda-like polypeptide 1 (CD179 antigen-like family member B) (Ig lambda-5) (Immunoglobulin omega polypeptide) (Immunoglobulin-related protein 14.1) (CD antigen CD179b)	2.91567e+07	5.1697e+07	7.27179e+07	335379	3.11188e+06	3.10713e+07	1.4617e+07	9.86624e+06	0	3.63599e+07	3.02158e+07	1.18026e+08	2.42547e+07	6.77088e+06	9.36104e+07	6.37616e+07	7.02064e+07	6.69126e+07	1.21942e+07	1.50144e+07	2.32396e+07	7.57856e+06	9.81337e+06	1.35022e+07	3.68056e+06	6.04031e+06	1.14994e+07	7.63943e+06	1.10186e+07	1.17202e+07	1.40387e+08	5.0496e+07	7.08788e+07	3.09163e+08	1.52153e+08	1.75584e+07	9.32984e+06	6.26508e+06	1.76042e+07	9.52322e+07	2.06057e+07	1.01866e+07	1.13207e+07	1.13675e+07	6.16602e+06	2.23763e+07
	O14498	ISLR_HUMAN	Immunoglobulin superfamily containing leucine-rich repeat protein	725108	1.0905e+06	0	0	296024	0	0	0	0	0	727312	0	0	0	730348	0	0	345062	595653	0	722132	0	2.36156e+06	682706	1.49562e+06	786337	0	0	236066	1.01327e+06	0	1.03318e+06	1.79701e+06	5.53285e+06	0	879046	567017	1.13216e+06	1.15366e+06	903183	704088	713407	494115	975928	691292	739554
	Q969P0	IGSF8_HUMAN	Immunoglobulin superfamily member 8 (IgSF8) (CD81 partner 3) (Glu-Trp-Ile EWI motif-containing protein 2) (EWI-2) (Keratinocytes-associated transmembrane protein 4) (KCT-4) (LIR-D1) (Prostaglandin regulatory-like protein) (PGRL) (CD antigen CD316)	1.20789e+06	1.7248e+06	796910	0	601490	0	797175	0	0	0	775179	0	0	0	0	0	0	0	848151	0	662273	0	0	0	2.71474e+06	0	0	0	0	0	0	1.02845e+06	2.22332e+06	0	0	1.85991e+06	1.07512e+06	1.8147e+06	1.78719e+06	1.12322e+06	645838	1.44851e+06	700125	2.31e+06	1.14267e+06	1.288e+06
	Q9NX62	IMPA3_HUMAN	Inositol monophosphatase 3 (IMP 3) (IMPase 3) (EC 3.1.3.25) (EC 3.1.3.7) (Golgi 3-prime phosphoadenosine 5-prime phosphate 3-prime phosphatase) (Golgi-resident PAP phosphatase) (gPAPP) (Inositol monophosphatase domain-containing protein 1) (Inositol-1(or 4)-monophosphatase 3) (Myo-inositol monophosphatase A3)	0	0	0	0	0	0	0	0	0	0	0	0	0	0	0	0	0	0	0	0	0	0	0	0	1.13733e+06	0	0	0	0	0	0	0	0	0	0	782822	0	699576	0	0	0	978972	0	0	0	0
	P01344	IGF2_HUMAN	Insulin-like growth factor II (IGF-II) (Somatomedin-A) (T3M-11-derived growth factor) [Cleaved into: Insulin-like growth factor II; Insulin-like growth factor II Ala-25 Del; Preptin]	6.9197e+06	0	0	0	1.28744e+06	0	0	0	0	0	0	0	1.43613e+06	0	3.68924e+06	1.35861e+06	2.34632e+06	1.19812e+06	3.27364e+06	565294	2.77844e+06	1.21799e+06	0	0	679454	0	0	0	0	0	0	0	1.32664e+07	1.51304e+07	0	3.69972e+06	5.11013e+06	6.56951e+06	0	931704	0	4.73328e+06	0	2.10992e+06	0	1.5994e+06
	P18065	IBP2_HUMAN	Insulin-like growth factor-binding protein 2 (IBP-2) (IGF-binding protein 2) (IGFBP-2)	6.15579e+06	3.64438e+06	1.76422e+06	0	1.87043e+06	766778	990997	0	5.15807e+06	3.2444e+06	642770	1.08584e+06	761296	0	1.0914e+06	778283	1.52137e+06	960592	1.11542e+06	580530	1.68914e+06	998337	7.18237e+06	740250	2.48513e+06	527555	0	0	1.02009e+06	2.06039e+06	7.40685e+06	1.20808e+06	9.69385e+06	6.00826e+06	2.15942e+06	2.37547e+06	2.42078e+06	3.55153e+06	2.03348e+06	1.82171e+06	727801	2.2108e+06	1.17731e+06	2.41705e+06	1.52234e+06	2.2893e+06
	P17936	IBP3_HUMAN	Insulin-like growth factor-binding protein 3 (IBP-3) (IGF-binding protein 3) (IGFBP-3)	1156200	192087	776433	0	261351	121711	218544	0	0	0	0	0	648375	0	1.3601e+06	0	0	0	0	0	0	0	0	0	0	0	0	0	0	0	2.31281e+06	1.14785e+06	1704372	8631761	0	0	322824	0	0	0	0	227109	0	0	0	0
	P22692	IBP4_HUMAN	Insulin-like growth factor-binding protein 4 (IBP-4) (IGF-binding protein 4) (IGFBP-4)	6.08431e+06	1.98858e+06	0	0	611852	811935	493271	0	0	3.01772e+06	897962	0	1.00637e+06	0	1.1293e+06	1.24439e+06	969177	951224	1.04157e+06	0	1.85425e+06	0	9.23981e+06	0	1.12198e+06	0	0	0	538967	1337416	6.86476e+06	6.80156e+06	1.34944e+07	4.48986e+06	5.42145e+07	1.33828e+06	1.19388e+06	2.31508e+06	1.98217e+06	0	0	1.47988e+06	0	0	0	706315
	P24592	IBP6_HUMAN	Insulin-like growth factor-binding protein 6 (IBP-6) (IGF-binding protein 6) (IGFBP-6)	7.3087e+06	1.16373e+07	5.65416e+06	0	9.25488e+06	0	0	0	5.01776e+06	7.0848e+06	3.41731e+06	4.86588e+06	1.74969e+06	0	3754725	600086	1.84795e+06	2.01904e+06	5.55358e+06	618704	3.368e+06	900783	1.20207e+07	1.75947e+06	4.90658e+06	1.88253e+06	0	0	4.53597e+06	3.16478e+06	2.33255e+07	3.05925e+06	1.51289e+07	1.19229e+07	3.93971e+06	7.57064e+06	8.87654e+06	1.28689e+07	1.32771e+07	4.50063e+06	4.37414e+06	1.12814e+07	3.47049e+06	5.19182e+06	4.90808e+06	4.5276e+06
	Q16270	IBP7_HUMAN	Insulin-like growth factor-binding protein 7 (IBP-7) (IGF-binding protein 7) (IGFBP-7) (IGFBP-rP1) (MAC25 protein) (PGI2-stimulating factor) (Prostacyclin-stimulating factor) (Tumor-derived adhesion factor) (TAF)	3.12641e+06	2.7524e+06	2.90834e+06	0	1.78758e+06	1.5051e+06	2.88499e+06	0	1.85095e+06	0	304086	950669	2.13205e+06	943236	2.47962e+06	3.19262e+06	3.74296e+06	2.62246e+06	1.52839e+06	2.24679e+06	3.87149e+06	3.90672e+06	2.11369e+06	2.07421e+06	3.06499e+06	0	346416	0	0	1.16048e+06	2.95599e+06	3.24216e+06	5.82803e+06	1.20561e+07	8.7146e+06	3.66001e+06	2.33248e+06	4.10172e+06	1.7863e+06	1.68589e+06	2.3841e+06	3.04447e+06	1381010	2.49803e+06	1.84394e+06	1.71773e+06
	P35858	ALS_HUMAN	Insulin-like growth factor-binding protein complex acid labile subunit (ALS)	707736	0	1.56211e+06	1.21875e+06	35611.7	424398	1.31851e+06	0	3557890	1.52537e+06	370074	0	2.54124e+06	0	4.33185e+06	1.99706e+06	2.44756e+06	680094	0	400164	1.30165e+06	2.12572e+06	2.07315e+06	2.20068e+06	0	327733	443941	234300	0	0	792654	2.46705e+06	0	1.10338e+07	3.98141e+06	243397	183372	349654	657258	731364	858994	350721	353524	619766	0	928886
	Q9Y287	ITM2B_HUMAN	Integral membrane protein 2B (Immature BRI2) (imBRI2) (Protein E25B) (Transmembrane protein BRI) (Bri) [Cleaved into: BRI2, membrane form (Mature BRI2) (mBRI2); BRI2 intracellular domain (BRI2 ICD); BRI2C, soluble form; Bri23 peptide (Bri2-23) (ABri23) (C-terminal peptide) (P23 peptide)]	0	0	0	0	0	0	0	0	0	0	0	0	0	0	0	0	0	0	0	0	0	0	0	0	701755	0	0	0	0	0	0	0	0	0	0	0	0	1.59495e+06	0	0	0	0	0	0	0	0
	P11215	ITAM_HUMAN	Integrin alpha-M (CD11 antigen-like family member B) (CR-3 alpha chain) (Cell surface glycoprotein MAC-1 subunit alpha) (Leukocyte adhesion receptor MO1) (Neutrophil adherence receptor) (CD antigen CD11b)	1.6397e+06	0	201379	861650	0	246650	735590	0	2.43945e+06	768322	547889	503417	1.81217e+06	0	350508	701789	1.69632e+06	605072	0	511042	1.71384e+06	1.64094e+06	1.60478e+07	1.69832e+06	0	0	0	125267	0	353012	2.07143e+06	505307	1.7175e+06	4.07506e+06	3.34032e+06	0	0	0	0	0	0	0	0	0	0	0
	P05107	ITB2_HUMAN	Integrin beta-2 (Cell surface adhesion glycoproteins LFA-1/CR3/p150,95 subunit beta) (Complement receptor C3 subunit beta) (CD antigen CD18)	597986	0	0	932162	0	0	432195	0	0	0	0	0	1.48124e+06	0	0	353612	1.73005e+06	377898	0	405233	565073	922908	1.54696e+06	1.7054e+06	0	0	0	0	0	0	954209	209948	665075	0	0	0	0	0	0	0	0	0	0	0	0	0
	P19827	ITIH1_HUMAN	Inter-alpha-trypsin inhibitor heavy chain H1 (ITI heavy chain H1) (ITI-HC1) (Inter-alpha-inhibitor heavy chain 1) (Inter-alpha-trypsin inhibitor complex component III) (Serum-derived hyaluronan-associated protein) (SHAP)	5.40726e+06	1.18963e+06	6.56911e+06	5.0323e+06	511075	2.38835e+06	3.86469e+06	906569	2.64808e+07	8.01112e+06	3.18896e+06	8.52613e+06	6.78098e+06	262097	8.16941e+06	4.73238e+06	7.0546e+06	3.38948e+06	463566	1.62373e+06	3.44243e+06	4.20427e+06	7.47225e+06	7.28265e+06	1.10187e+06	1.80534e+06	1.23639e+06	1.01695e+06	692700	1.64406e+06	8.01864e+06	1.18518e+07	5.27901e+06	6.24883e+07	2.48344e+07	1.52447e+06	822784	1.30191e+06	3.44802e+06	3.02305e+06	3.55087e+06	853951	688243	1.83032e+06	974409	1.87807e+06
	P19823	ITIH2_HUMAN	Inter-alpha-trypsin inhibitor heavy chain H2 (ITI heavy chain H2) (ITI-HC2) (Inter-alpha-inhibitor heavy chain 2) (Inter-alpha-trypsin inhibitor complex component II) (Serum-derived hyaluronan-associated protein) (SHAP)	4.65171e+06	1.47115e+06	5.69198e+06	7.32475e+06	272363	2.64624e+06	4.21687e+06	757110	3.59845e+07	1.07343e+07	3.07601e+06	1.30844e+07	8.44725e+06	370920	1.35364e+07	6.95697e+06	1.03131e+07	4.23272e+06	450866	2.03557e+06	3.70538e+06	4.77106e+06	8.86897e+06	6.12992e+06	1.08012e+06	1.35159e+06	1.63046e+06	735404	993441	1.63369e+06	4.30882e+06	1.21551e+07	2.34449e+06	9.13496e+07	3.1719e+07	3.96015e+06	2.09878e+06	2.87768e+06	5.53941e+06	4.96809e+06	3.40175e+06	1.46154e+06	836819	2.69138e+06	1.53427e+06	2.4869e+06
	Q06033	ITIH3_HUMAN	Inter-alpha-trypsin inhibitor heavy chain H3 (ITI heavy chain H3) (ITI-HC3) (Inter-alpha-inhibitor heavy chain 3) (Serum-derived hyaluronan-associated protein) (SHAP)	3.03101e+06	591105	1.88483e+06	734154	381221	1.26179e+06	1.1067e+06	376284	1.90308e+07	4.65846e+06	838220	3.41842e+06	2690279	0	2.2039e+06	1.08342e+06	3.35175e+06	1.14359e+06	572870	1.14468e+06	1.507e+06	1.57227e+06	7.85071e+06	630673	0	2.18761e+06	528250	638439	793289	1.26678e+06	3.55013e+06	3.8964e+06	3.48953e+06	3.46521e+07	1.1125e+07	771922	335623	1.18868e+06	0	2.0567e+06	571710	1.19615e+06	0	0	0	364550
	Q14624	ITIH4_HUMAN	Inter-alpha-trypsin inhibitor heavy chain H4 (ITI heavy chain H4) (ITI-HC4) (Inter-alpha-inhibitor heavy chain 4) (Inter-alpha-trypsin inhibitor family heavy chain-related protein) (IHRP) (Plasma kallikrein sensitive glycoprotein 120) (Gp120) (PK-120) [Cleaved into: 70 kDa inter-alpha-trypsin inhibitor heavy chain H4; 35 kDa inter-alpha-trypsin inhibitor heavy chain H4]	6.88436e+06	2.08889e+06	6.74341e+06	5.119e+06	628638	4.75368e+06	3.70963e+06	765004	6.82186e+07	1.39856e+07	5.73114e+06	1.21699e+07	1.27732e+07	748144	9.53711e+06	5.60186e+06	1.13202e+07	5.53341e+06	825670	3.10615e+06	4.67479e+06	4.12496e+06	1.30488e+07	4.90805e+06	1.19324e+06	3.12446e+06	1.21909e+06	1.48297e+06	1.73172e+06	2.99212e+06	1.7262e+07	7.96124e+06	9.93584e+06	6.77762e+07	1.81583e+07	1.34253e+06	766457	1.6113e+06	2.51478e+06	3.72236e+06	2.77306e+06	1.01083e+06	860825	1.87818e+06	996259	1.74695e+06
	Q86UX2	ITIH5_HUMAN	Inter-alpha-trypsin inhibitor heavy chain H5 (ITI heavy chain H5) (ITI-HC5) (Inter-alpha-inhibitor heavy chain 5)	0	1.1417e+06	0	0	254984	0	0	0	0	0	0	0	0	0	0	0	0	0	364518	0	408024	0	0	0	1.28684e+06	0	0	0	0	0	0	0	0	0	0	568839	635910	1.15609e+06	1.04326e+06	0	0	669820	683534	1.52045e+06	806506	1.13355e+06
	P13598	ICAM2_HUMAN	Intercellular adhesion molecule 2 (ICAM-2) (CD antigen CD102)	0	0	0	0	0	0	0	0	0	0	0	0	0	0	0	0	0	0	0	0	0	0	2.04121e+06	0	0	0	0	0	0	0	0	0	1.69325e+06	3.7993e+06	0	0	0	0	0	0	0	0	0	0	0	0
	Q9UMF0	ICAM5_HUMAN	Intercellular adhesion molecule 5 (ICAM-5) (Telencephalin)	69659.5	428219	0	0	0	0	0	0	0	0	0	0	0	0	0	0	0	0	0	0	0	0	0	0	490131	0	0	0	0	0	0	0	0	0	0	0	192309	123859	0	0	0	84714.1	0	0	228952	369531
	P18510	IL1RA_HUMAN	Interleukin-1 receptor antagonist protein (IL-1RN) (IL-1ra) (IRAP) (ICIL-1RA) (IL1 inhibitor) (Anakinra)	1.11636e+06	0	0	0	0	566657	1.08915e+06	0	0	0	0	3.26169e+06	3.57969e+06	0	1273997	770738	5.86948e+06	1.54133e+06	0	663001	904236	3.35588e+06	4.86803e+06	0	0	0	0	0	0	0	0	0	0	6.70552e+06	0	0	0	0	0	0	0	0	0	0	0	0
	P27930	IL1R2_HUMAN	Interleukin-1 receptor type 2 (IL-1R-2) (IL-1RT-2) (IL-1RT2) (CD121 antigen-like family member B) (CDw121b) (IL-1 type II receptor) (Interleukin-1 receptor beta) (IL-1R-beta) (Interleukin-1 receptor type II) (CD antigen CD121b) [Cleaved into: Interleukin-1 receptor type 2, membrane form (mIL-1R2) (mIL-1RII); Interleukin-1 receptor type 2, soluble form (sIL-1R2) (sIL-1RII)]	9.46569e+06	0	0	0	0	0	0	0	0	0	0	0	0	0	0	0	506977	0	0	1.18138e+06	3.73905e+06	0	1.71095e+07	0	0	0	0	0	1.49679e+06	5.30487e+06	9.75706e+06	3.1723e+06	7.10881e+06	0	3.4091e+06	0	0	0	0	0	0	0	0	0	0	0
	O95998	I18BP_HUMAN	Interleukin-18-binding protein (IL-18BP) (Tadekinig-alfa)	1.18517e+07	0	0	0	0	0	0	0	0	0	0	0	0	0	0	0	0	0	0	0	341342	0	4.18458e+06	0	0	0	0	0	0	0	0	0	0	0	0	0	0	0	0	0	0	0	0	0	0	0
	P05231	IL6_HUMAN	Interleukin-6 (IL-6) (B-cell stimulatory factor 2) (BSF-2) (CTL differentiation factor) (CDF) (Hybridoma growth factor) (Interferon beta-2) (IFN-beta-2)	960268	0	0	884610	0	650210	3.62846e+06	170206	1.01321e+07	0	608131	2.04624e+06	3.85274e+06	0	2.33553e+06	1.51023e+06	4.7809e+06	1.98681e+06	0	966395	1.77136e+06	3.05698e+06	4.17472e+06	0	0	0	0	503320	125569	867506	3.34436e+06	4.27113e+06	0	2.87244e+07	0	0	0	0	0	0	0	0	0	0	0	0
	P40189	IL6RB_HUMAN	Interleukin-6 receptor subunit beta (IL-6 receptor subunit beta) (IL-6R subunit beta) (IL-6R-beta) (IL-6RB) (CDw130) (Interleukin-6 signal transducer) (Membrane glycoprotein 130) (gp130) (Oncostatin-M receptor subunit alpha) (CD antigen CD130)	0	705044	0	0	0	0	0	0	0	0	0	0	0	0	0	0	0	0	0	0	0	0	0	0	947350	0	0	0	0	0	0	0	1.02142e+06	0	0	488192	530936	793356	1.15052e+06	0	0	631058	367562	0	636709	618681
	O75874	IDHC_HUMAN	Isocitrate dehydrogenase [NADP] cytoplasmic (IDH) (EC 1.1.1.42) (Cytosolic NADP-isocitrate dehydrogenase) (IDP) (NADP(+)-specific ICDH) (Oxalosuccinate decarboxylase)	0	0	0	0	393296	0	0	0	0	0	0	852342	0	0	0	335542	0	0	0	0	438596	351502	2.94131e+06	791199	0	0	0	0	0	0	3.89467e+06	0	2.38474e+06	0	0	0	0	0	0	0	0	0	0	0	0	0
	Q92876	KLK6_HUMAN	Kallikrein-6 (EC 3.4.21.-) (Neurosin) (Protease M) (SP59) (Serine protease 18) (Serine protease 9) (Zyme)	6.14543e+06	9.14715e+06	3.11237e+06	845546	1.94037e+06	1.3474e+06	3.81609e+06	429455	5.14674e+06	3.35043e+06	3.69016e+06	851653	1.9175e+06	1.70813e+06	2.63077e+06	1.52739e+06	2.7322e+06	3.06825e+06	4.90457e+06	1.54545e+06	7.05658e+06	1.89691e+06	6781843	2.42652e+06	7.9613e+06	1.47664e+06	956869	298707	1.21972e+06	0	1.65476e+06	5.13904e+06	5.18343e+06	1.48696e+07	4.38938e+06	1.22044e+07	1.08621e+07	1.89945e+07	7.01519e+06	4.85971e+06	3.56353e+06	1.02999e+07	4.11651e+06	1.06419e+07	5.14076e+06	5.67501e+06
	P29622	KAIN_HUMAN	Kallistatin (Kallikrein inhibitor) (Peptidase inhibitor 4) (PI-4) (Serpin A4)	764723	834296	1.97326e+06	1.94494e+06	512943	417896	841271	0	5.05062e+06	1.2002e+06	0	4.75349e+06	2056088	0	5.31736e+06	2.46622e+06	2.19056e+06	834308	300303	774943	0	0	975116	0	695891	0	368146	0	0	728600	3.91382e+06	929090	0	1.19149e+07	2.7965e+06	0	0	0	2.0949e+06	1.64245e+06	1.30065e+06	0	784384	1.6766e+06	892459	1.48409e+06
	P13645	K1C10_HUMAN	Keratin, type I cytoskeletal 10 (Cytokeratin-10) (CK-10) (Keratin-10) (K10)	3.87916e+06	3.46222e+06	2.7641e+06	3.70806e+06	724515	399037	825577	378002	0	0	9.47613e+06	1.2993e+06	2.60001e+06	1.94277e+06	2.87142e+06	2.88833e+06	1.6537e+06	2.18677e+06	2.34986e+06	1.17955e+06	0	511223	4.57353e+07	405345	5.3148e+06	1.48157e+06	2.20708e+06	686862	1.35317e+06	1.70765e+06	5.20906e+06	611927	1.53378e+07	6.69708e+06	5.25987e+06	3.00741e+06	1.95027e+06	2.08554e+06	4.77431e+06	4.6331e+06	8.06098e+06	2.44326e+06	422272	1.77902e+06	1.52477e+06	1.63187e+06
	P02533	K1C14_HUMAN	Keratin, type I cytoskeletal 14 (Cytokeratin-14) (CK-14) (Keratin-14) (K14)	1.37513e+07	468534	0	0	0	0	0	0	0	0	0	0	0	272016	378059	230033	0	0	461355	0	0	0	0	0	685056	2.76918e+06	341835	0	160634	0	0	0	0	0	0	237545	143527	309048	567634	994049	642115	322030	0	0	0	0
	P08779	K1C16_HUMAN	Keratin, type I cytoskeletal 16 (Cytokeratin-16) (CK-16) (Keratin-16) (K16)	0	246209	0	0	0	0	0	0	0	0	0	0	0	0	0	0	0	0	0	0	0	0	0	0	913946	351357	0	0	0	0	0	0	0	0	0	0	0	563299	0	964209	416628	451937	0	0	0	0
	P35527	K1C9_HUMAN	Keratin, type I cytoskeletal 9 (Cytokeratin-9) (CK-9) (Keratin-9) (K9)	1.25928e+06	4.12152e+06	696902	146516	756348	644143	1.26972e+06	504471	420933	507247	303041	1.21147e+06	1.95576e+06	2.04202e+06	2.84059e+06	2.58048e+06	2.16577e+06	518927	2.64406e+06	1.39822e+06	0	600868	868291	556029	4.41911e+06	1.60581e+06	1.58627e+06	453098	1.24694e+06	465907	2.94059e+06	1.20166e+06	1.52858e+06	5.48514e+06	1.9451e+06	1.72526e+06	1.43934e+06	2.06711e+06	3.84797e+06	6.0285e+06	4.98654e+06	3.08816e+06	920911	1.80441e+06	1.80958e+06	2.1786e+06
	P04264	K2C1_HUMAN	Keratin, type II cytoskeletal 1 (67 kDa cytokeratin) (Cytokeratin-1) (CK-1) (Hair alpha protein) (Keratin-1) (K1) (Type-II keratin Kb1)	1.56239e+06	4.24856e+06	1.77879e+06	0	1.10918e+06	348617	1.98168e+06	827487	0	0	0	443254	2.92508e+06	2.88136e+06	3.66224e+06	1.85042e+06	1.49785e+06	679511	4.04321e+06	1.44809e+06	0	622245	1.75089e+06	557787	6.26944e+06	1771101	1.67491e+06	693772	1.13195e+06	637886	4.79568e+06	770618	1.2522e+06	9.15378e+06	5.74979e+06	2.30645e+06	1.89572e+06	1.87194e+06	4.2813e+06	5.28819e+06	5.8537e+06	3.72469e+06	391019	3.85477e+06	3.39174e+06	3.72809e+06
	P35908	K22E_HUMAN	Keratin, type II cytoskeletal 2 epidermal (Cytokeratin-2e) (CK-2e) (Epithelial keratin-2e) (Keratin-2 epidermis) (Keratin-2e) (K2e) (Type-II keratin Kb2)	1.73768e+06	1.7158e+06	437145	0	363109	190740	1.82944e+06	194404	0	0	0	0	1.02704e+06	1.21574e+06	1.83972e+06	662712	685249	786171	1.31703e+06	534429	0	0	0	0	3.29081e+06	365926	867833	342296	719562	140473	1.79288e+06	0	839024	2036472	2.4393e+06	1.54931e+06	1.20276e+06	819594	2.16025e+06	2.67569e+06	2.25484e+06	1.70838e+06	168127	1.17128e+06	883728	695563
	P13647	K2C5_HUMAN	Keratin, type II cytoskeletal 5 (58 kDa cytokeratin) (Cytokeratin-5) (CK-5) (Keratin-5) (K5) (Type-II keratin Kb5)	0	1.52328e+06	0	0	0	0	0	0	0	0	0	0	0	478901	1.00689e+06	0	0	0	547051	0	0	0	0	0	1.48758e+06	0	591941	0	326596	0	0	0	0	0	0	291034	400256	495981	857809	1.4097e+06	1.65902e+06	421301	0	455636	0	0
	P01042	KNG1_HUMAN	Kininogen-1 (Alpha-2-thiol proteinase inhibitor) (Fitzgerald factor) (High molecular weight kininogen) (HMWK) (Williams-Fitzgerald-Flaujeac factor) [Cleaved into: Kininogen-1 heavy chain; T-kinin (Ile-Ser-Bradykinin); Bradykinin (Kallidin I); Lysyl-bradykinin (Kallidin II); Kininogen-1 light chain; Low molecular weight growth-promoting factor]	1.36875e+07	2.61558e+06	9.95713e+06	6.0279e+06	884901	4.4654e+06	6.96846e+06	734977	7.41171e+07	1.57159e+07	1.14999e+07	1.4259e+07	1.4846e+07	217909	1.8866e+07	1.13048e+07	1.51967e+07	6.79769e+06	2.19033e+06	4.18793e+06	1.12472e+07	8.47191e+06	2.65864e+07	1.15256e+07	1.81308e+06	3.18166e+06	1.57596e+06	1.25876e+06	1.48296e+06	4.83559e+06	1.94639e+07	1.57367e+07	1.47025e+07	1.42717e+08	5.94627e+07	4.01672e+06	2.9451e+06	5.54927e+06	6.13872e+06	5.10494e+06	4.62637e+06	3.9866e+06	2.29632e+06	4.65468e+06	1.85297e+06	5.02526e+06
	O43291	SPIT2_HUMAN	Kunitz-type protease inhibitor 2 (Hepatocyte growth factor activator inhibitor type 2) (HAI-2) (Placental bikunin)	0	730293	0	0	0	0	0	0	0	0	0	0	0	0	0	0	0	0	0	0	0	0	0	0	0	0	0	0	0	0	0	0	0	0	0	0	0	0	0	0	0	0	0	0	0	0
	P00338	LDHA_HUMAN	L-lactate dehydrogenase A chain (LDH-A) (EC 1.1.1.27) (Cell proliferation-inducing gene 19 protein) (LDH muscle subunit) (LDH-M) (Renal carcinoma antigen NY-REN-59)	4.26247e+06	662223	4.19503e+06	1.70052e+06	1.46874e+06	0	1.96739e+06	0	4.02166e+06	3.26599e+06	1.07736e+06	3.70122e+06	2.37281e+06	0	1.16542e+06	1.74829e+06	1.56372e+06	597269	0	459264	2.03854e+06	852966	6.67889e+06	6.23473e+06	848415	638927	561060	0	341054	1.56587e+06	1.87456e+07	0	1.603e+07	3.62049e+06	5.15191e+06	451761	352504	475229	605698	0	0	514545	0	465642	323716	733925
	P07195	LDHB_HUMAN	L-lactate dehydrogenase B chain (LDH-B) (EC 1.1.1.27) (LDH heart subunit) (LDH-H) (Renal carcinoma antigen NY-REN-46)	1.90847e+06	1.15646e+06	4.38709e+06	0	743224	343016	2.33843e+06	0	0	2.13084e+06	749475	0	1.46496e+06	176072	722492	916587	1.44168e+06	680661	296150	568768	874731	945777	4.58516e+06	2.03966e+06	1.52293e+06	0	559705	0	347159	1.24508e+06	7.81335e+06	0	7.48978e+06	0	0	507984	428318	740290	729829	0	415082	646853	528731	1.41752e+06	914633	947228
	P14151	LYAM1_HUMAN	L-selectin (CD62 antigen-like family member L) (Leukocyte adhesion molecule 1) (LAM-1) (Leukocyte surface antigen Leu-8) (Leukocyte-endothelial cell adhesion molecule 1) (LECAM1) (Lymph node homing receptor) (TQ1) (gp90-MEL) (CD antigen CD62L)	3.48894e+06	0	0	0	695006	728153	1.16085e+06	0	1.03756e+07	5.30644e+06	0	3.76411e+06	2.34987e+06	0	2.00737e+06	1.95969e+06	3.49401e+06	1.73501e+06	0	917238	2.01502e+06	2.51774e+06	1.39024e+07	0	0	0	0	0	0	2.37672e+06	5011359	4.24208e+06	4.22858e+06	1.60343e+07	9.48402e+06	0	0	432968	0	0	0	0	0	0	0	0
	Q08431	MFGM_HUMAN	Lactadherin (Breast epithelial antigen BA46) (HMFG) (MFGM) (Milk fat globule-EGF factor 8) (MFG-E8) (SED1) [Cleaved into: Lactadherin short form; Medin]	812044	0	0	0	0	0	0	0	0	0	0	0	0	0	0	0	0	0	0	0	1.03719e+06	0	0	0	555261	0	0	0	0	0	0	0	0	0	0	128923	0	208188	0	0	0	727780	0	471073	0	131547
	P02788	TRFL_HUMAN	Lactotransferrin (Lactoferrin) (EC 3.4.21.-) (Growth-inhibiting protein 12) (Talalactoferrin) [Cleaved into: Lactoferricin-H (Lfcin-H); Kaliocin-1; Lactoferroxin-A; Lactoferroxin-B; Lactoferroxin-C]	922360	0	6.26566e+06	7.08925e+06	1.12744e+06	1.71339e+06	1.67418e+07	444519	5.03587e+07	6.6261e+06	6.36451e+06	1.55567e+07	1.59317e+07	574171	1.73063e+06	1.08831e+07	1.50747e+07	1.68392e+06	0	6.81694e+06	4.05214e+06	2.88089e+07	5.78218e+06	1.60236e+07	832810	662662	931552	377251	477048	1.36435e+06	2.17863e+07	2.14121e+06	2.12863e+06	3.32932e+07	3.07768e+07	0	0	0	0	0	438669	0	0	0	0	0
	P20700	LMNB1_HUMAN	Lamin-B1	736067	0	0	0	0	0	0	0	0	0	0	0	0	0	0	0	0	0	0	0	0	6.21767e+06	0	1.58934e+06	0	0	0	0	0	0	2.14662e+06	0	1.10636e+06	0	0	0	0	0	0	0	0	0	0	0	0	0
	P24043	LAMA2_HUMAN	Laminin subunit alpha-2 (Laminin M chain) (Laminin-12 subunit alpha) (Laminin-2 subunit alpha) (Laminin-4 subunit alpha) (Merosin heavy chain)	0	0	0	0	0	0	0	0	0	0	0	0	0	0	0	0	0	0	0	0	0	0	0	0	0	0	0	0	0	0	236217	0	0	0	0	0	122869	218762	0	0	0	134161	0	0	0	0
	P11047	LAMC1_HUMAN	Laminin subunit gamma-1 (Laminin B2 chain) (Laminin-1 subunit gamma) (Laminin-10 subunit gamma) (Laminin-11 subunit gamma) (Laminin-2 subunit gamma) (Laminin-3 subunit gamma) (Laminin-4 subunit gamma) (Laminin-6 subunit gamma) (Laminin-7 subunit gamma) (Laminin-8 subunit gamma) (Laminin-9 subunit gamma) (S-laminin subunit gamma) (S-LAM gamma)	398802	0	0	0	0	0	0	0	0	0	0	0	0	0	0	0	0	0	131671	0	0	0	479741	0	0	0	0	0	0	237787	0	0	1.25678e+06	0	0	125007	0	289402	0	0	0	0	0	0	0	0
	Q14767	LTBP2_HUMAN	Latent-transforming growth factor beta-binding protein 2 (LTBP-2)	1.26024e+06	324646	0	0	123769	0	0	0	428372	0	0	0	0	0	232954	0	0	0	0	0	2.03677e+06	123765	1.54394e+06	0	0	0	0	0	186226	0	1.31103e+06	0	1.93374e+06	0	0	243987	310103	420635	0	0	0	236692	0	0	0	0
	Q8N2S1	LTBP4_HUMAN	Latent-transforming growth factor beta-binding protein 4 (LTBP-4)	0	1.08777e+06	0	0	0	0	0	0	0	0	0	0	0	0	0	0	0	0	0	0	0	0	383584	0	0	0	0	0	0	0	0	0	508982	0	0	703354	540483	626237	0	0	0	803548	0	0	0	282062
	P02750	A2GL_HUMAN	Leucine-rich alpha-2-glycoprotein (LRG)	3.59288e+07	9.13716e+06	1.65279e+07	6.99937e+06	4.99354e+06	1.37134e+07	1.08501e+07	3.39626e+06	1.78011e+08	6.37719e+07	2.35776e+07	2.27888e+07	3.78063e+07	1.17723e+06	1.01594e+07	1.1847e+07	4.16774e+07	2.29468e+07	9.15149e+06	1.5594e+07	1.82017e+07	1.94047e+07	6.21319e+07	1.04551e+07	4.11772e+06	1.33199e+07	6.34803e+06	8.17276e+06	8.71452e+06	1.80297e+07	1.01361e+08	4.04818e+07	4.08344e+07	2.44398e+08	6.81885e+07	3.50911e+06	2.53854e+06	9.14876e+06	4.61846e+06	8.30877e+06	3.87617e+06	5.9828e+06	2.05273e+06	5.66907e+06	1.75075e+06	4.06747e+06
	Q96FE5	LIGO1_HUMAN	Leucine-rich repeat and immunoglobulin-like domain-containing nogo receptor-interacting protein 1 (Leucine-rich repeat and immunoglobulin domain-containing protein 1) (Leucine-rich repeat neuronal protein 1) (Leucine-rich repeat neuronal protein 6A)	0	0	0	0	0	0	0	0	0	0	0	0	0	0	0	0	0	0	0	0	0	0	0	0	520423	0	0	0	0	0	0	0	0	0	0	0	0	0	0	0	0	0	0	0	0	0
	Q9NT99	LRC4B_HUMAN	Leucine-rich repeat-containing protein 4B (Netrin-G3 ligand) (NGL-3)	0	831471	0	0	178613	0	0	0	0	0	0	0	0	0	0	0	0	0	0	0	0	0	0	0	1.14018e+06	0	0	0	0	0	0	0	0	0	0	464862	612309	990581	0	0	0	600119	0	1.00033e+06	906646	698201
	P30740	ILEU_HUMAN	Leukocyte elastase inhibitor (LEI) (Monocyte/neutrophil elastase inhibitor) (EI) (M/NEI) (Peptidase inhibitor 2) (PI-2) (Serpin B1)	3.95363e+06	0	1.36526e+06	967636	768166	729380	1.40198e+06	0	0	944106	282896	4.98258e+06	1.52794e+06	0	520323	1.36638e+06	641917	0	0	320066	1.53292e+06	1.22175e+06	3.09788e+06	0	0	0	376028	0	196061	867826	5.86999e+06	0	4.72224e+06	0	1.96633e+06	0	0	0	0	0	0	0	0	0	0	0
	Q8N6C8	LIRA3_HUMAN	Leukocyte immunoglobulin-like receptor subfamily A member 3 (CD85 antigen-like family member E) (Immunoglobulin-like transcript 6) (ILT-6) (Leukocyte immunoglobulin-like receptor 4) (LIR-4) (Monocyte inhibitory receptor HM43/HM31) (CD antigen CD85e)	2.90413e+06	0	0	0	0	0	0	0	3.67599e+06	0	0	0	1.38491e+06	0	572749	625066	2.46228e+06	814287	0	686883	1.41966e+06	1.74927e+06	4.74568e+06	984256	0	0	0	0	0	838871	2.62332e+06	2.51594e+06	7.8442e+06	3.41249e+06	0	0	0	0	0	0	0	0	0	0	0	0
	P09960	LKHA4_HUMAN	Leukotriene A-4 hydrolase (LTA-4 hydrolase) (EC 3.3.2.6) (Leukotriene A(4) hydrolase)	1.79891e+06	0	655731	477828	396626	0	506683	0	0	0	0	1.62335e+06	1235236	0	0	842081	0	0	0	0	1.05507e+06	895900	2.80817e+06	3.74791e+06	0	0	0	0	0	340185	4.69905e+06	0	3.6309e+06	1.30522e+06	0	0	0	0	0	0	0	0	0	0	0	0
	Q14847	LASP1_HUMAN	LIM and SH3 domain protein 1 (LASP-1) (Metastatic lymph node gene 50 protein) (MLN 50)	797274	0	0	0	0	0	650601	0	0	0	0	0	0	0	0	0	0	0	0	0	424395	0	0	0	0	0	0	0	0	0	0	0	0	0	0	0	0	0	0	0	0	0	0	0	0	0
	Q13449	LSAMP_HUMAN	Limbic system-associated membrane protein (LSAMP) (IgLON family member 3)	1.53006e+06	6.03304e+06	0	0	1.66932e+06	0	0	0	0	0	960834	0	0	129617	0	0	0	581768	800546	0	1.05036e+06	0	1.67021e+06	0	4.67967e+06	358261	0	0	775757	0	0	532648	4.39195e+06	0	0	3.80776e+06	3.12384e+06	4.8452e+06	3.30804e+06	1.38258e+06	0	4.17694e+06	1.11489e+06	2.51934e+06	2.13766e+06	1.8905e+06
	P18428	LBP_HUMAN	Lipopolysaccharide-binding protein (LBP)	3.60954e+06	0	0	393328	0	1.23848e+06	710483	0	1.33503e+07	2.4826e+06	2.06836e+06	700048	2.30752e+06	0	956096	1.09559e+06	3.54768e+06	2.39364e+06	200467	2.26864e+06	2.09092e+06	2.14773e+06	2.86229e+06	1.32679e+06	0	2.41046e+06	437196	0	1.44122e+06	3.35892e+06	3.21842e+06	5.34106e+06	3.44882e+06	2.24548e+07	3.21881e+06	220057	134672	268577	0	469810	0	0	0	387427	0	391665
	P51884	LUM_HUMAN	Lumican (Keratan sulfate proteoglycan lumican) (KSPG lumican)	2.41584e+06	3.04317e+06	2.5948e+06	893913	793570	730212	757162	0	6.26714e+06	4.16255e+06	2.78798e+06	4.36379e+06	2.79521e+06	0	2.21333e+06	2.58737e+06	2.19313e+06	1.46511e+06	862905	464386	1.95756e+06	1.79738e+06	4.14016e+06	1.43995e+06	2.23758e+06	1.62292e+06	179766	165474	378274	4.38599e+06	9.59648e+06	2.1959e+06	6.42109e+06	1.53326e+07	8.58977e+06	2.86915e+06	1.68502e+06	1.98866e+06	3.21397e+06	3.64212e+06	2.07459e+06	1.71299e+06	1.34811e+06	3.50629e+06	1.64214e+06	2.10376e+06
	Q9BZG9	LYNX1_HUMAN	Ly-6/neurotoxin-like protein 1 (Secreted Ly-6/uPAR domain-containing protein 2) (Secreted Ly-6/uPAR-related protein 2) (SLURP-2)	1.38e+06	0	0	0	0	0	0	0	0	0	0	0	0	0	0	0	0	0	0	0	0	0	0	0	0	0	0	0	0	0	0	0	4.32347e+06	0	0	226775	0	0	0	0	0	0	0	0	0	0
	Q9Y5Y7	LYVE1_HUMAN	Lymphatic vessel endothelial hyaluronic acid receptor 1 (LYVE-1) (Cell surface retention sequence-binding protein 1) (CRSBP-1) (Extracellular link domain-containing protein 1) (Hyaluronic acid receptor)	1.02697e+06	1.65944e+06	0	0	758218	335875	0	0	0	1.22636e+06	0	1.88064e+06	0	0	1.48255e+06	365987	843295	0	856862	0	572422	574402	806591	0	1.31624e+06	0	0	0	609372	0	1.75529e+07	1177584	6.32989e+06	4.26948e+06	1.47998e+06	610249	488532	1.01113e+06	611372	0	406972	992656	312804	813730	453962	764443
	O94772	LY6H_HUMAN	Lymphocyte antigen 6H (Ly-6H)	1.61856e+06	2.68722e+06	0	0	1.13899e+06	0	302221	0	0	0	729411	0	0	0	0	0	0	0	501962	0	1.10002e+06	0	1728199	0	1.51162e+06	0	0	0	0	720909	0	0	4.98926e+06	3.13362e+06	0	2.61959e+06	2.75495e+06	3.78836e+06	679803	474169	0	1.84903e+06	152728	444309	252698	880964
	P33241	LSP1_HUMAN	Lymphocyte-specific protein 1 (47 kDa actin-binding protein) (52 kDa phosphoprotein) (pp52) (Lymphocyte-specific antigen WP34)	1.67176e+06	0	328003	0	592602	0	0	0	0	0	0	0	0	0	0	0	0	0	0	0	1.11113e+06	359102	0	5.30504e+06	0	0	0	0	0	0	4.3194e+06	0	4.64152e+06	0	0	0	0	0	0	0	0	0	0	0	0	0
	P10253	LYAG_HUMAN	Lysosomal alpha-glucosidase (EC 3.2.1.20) (Acid maltase) (Aglucosidase alfa) [Cleaved into: 76 kDa lysosomal alpha-glucosidase; 70 kDa lysosomal alpha-glucosidase]	0	390388	0	0	161313	0	0	0	0	0	0	0	0	0	0	0	0	0	0	0	0	0	0	0	0	0	0	0	0	0	0	0	0	0	0	247015	0	0	607444	0	0	0	0	0	0	0
	P42785	PCP_HUMAN	Lysosomal Pro-X carboxypeptidase (EC 3.4.16.2) (Angiotensinase C) (Lysosomal carboxypeptidase C) (Proline carboxypeptidase) (Prolylcarboxypeptidase) (PRCP)	0	0	0	0	0	0	0	0	0	0	0	0	0	0	0	0	0	0	0	0	0	0	0	0	0	0	0	0	0	0	0	0	0	0	0	0	257335	387656	0	0	0	0	0	206573	265638	267451
	P11279	LAMP1_HUMAN	Lysosome-associated membrane glycoprotein 1 (LAMP-1) (Lysosome-associated membrane protein 1) (CD107 antigen-like family member A) (CD antigen CD107a)	0	0	0	0	0	0	0	0	0	0	0	0	0	0	0	0	0	0	0	0	0	0	0	0	0	0	0	0	0	0	0	0	0	0	0	381939	0	0	0	0	0	439081	0	0	571359	0
	P13473	LAMP2_HUMAN	Lysosome-associated membrane glycoprotein 2 (LAMP-2) (Lysosome-associated membrane protein 2) (CD107 antigen-like family member B) (CD antigen CD107b)	0	3.05486e+06	1588025	658724	915928	393261	1.27757e+06	0	3.84611e+06	2.44838e+06	1.78201e+06	0	0	397147	0	944224	0	772157	1.1336e+06	548473	0	0	0	0	5.30517e+06	663507	0	0	581912	0	3.91729e+06	0	0	0	0	0	0	0	2.87151e+06	1.52165e+06	1.77606e+06	335690	1.64906e+06	3.36657e+06	2.13305e+06	4.3411e+06
	P61626	LYSC_HUMAN	Lysozyme C (EC 3.2.1.17) (1,4-beta-N-acetylmuramidase C)	4.18151e+07	4.27855e+06	5.60966e+06	9.77014e+06	1.3729e+07	7.54245e+06	2.37413e+07	1.49672e+06	7.39161e+07	2.53174e+07	2.91536e+06	2.87377e+07	2.70208e+07	656901	1.04735e+07	2.02542e+07	2.29291e+07	1.33437e+07	2.77344e+06	8.79252e+06	3.06602e+07	4.6485e+07	3.87318e+07	8.44293e+07	950239	4.06948e+06	2.37701e+06	2.03405e+06	1.57865e+06	1.01887e+07	7.19829e+07	1.70902e+07	52842505	5.65128e+07	7.77828e+07	3.55935e+06	2.46873e+06	2.54123e+06	4.03633e+06	4.74195e+06	3.98712e+06	1.55043e+06	838817	1.10539e+06	1.01177e+06	1.60751e+06
	P09603	CSF1_HUMAN	Macrophage colony-stimulating factor 1 (CSF-1) (M-CSF) (MCSF) (Lanimostim) [Cleaved into: Processed macrophage colony-stimulating factor 1]	2.25571e+06	2.27139e+06	0	0	0	0	1.02286e+06	0	0	0	0	0	870751	314190	888818	605694	1.18076e+06	732152	864009	737360	1.26084e+06	0	5.57725e+06	0	1111582	0	0	0	444860	1.84781e+06	5515343	2.54056e+06	7.32049e+06	5.69251e+06	0	1.03652e+06	969273	1.74316e+06	1.55342e+06	0	852606	1.0958e+06	751981	2.2482e+06	1.17169e+06	1587998
	P07333	CSF1R_HUMAN	Macrophage colony-stimulating factor 1 receptor (CSF-1 receptor) (CSF-1-R) (CSF-1R) (M-CSF-R) (EC 2.7.10.1) (Proto-oncogene c-Fms) (CD antigen CD115)	1.21818e+06	2.54369e+06	926038	0	894672	474603	408848	0	2.03613e+06	2.39533e+06	1.6632e+06	325077	460468	0	509334	0	0	1.37936e+06	698439	0	895652	565682	3.22754e+06	574000	1.74027e+06	1.02578e+06	0	0	343255	866378	9.43887e+06	1.25392e+06	5.88873e+06	6.33992e+06	1.44444e+06	1.2312e+06	859147	1.32339e+06	1.29937e+06	892163	694116	1.43664e+06	465678	1.14257e+06	989570	1.13168e+06
	P22897	MRC1_HUMAN	Macrophage mannose receptor 1 (MMR) (C-type lectin domain family 13 member D) (C-type lectin domain family 13 member D-like) (Human mannose receptor) (hMR) (Macrophage mannose receptor 1-like protein 1) (CD antigen CD206)	720068	370536	0	0	294346	0	0	0	0	0	0	0	0	0	0	0	0	0	194599	0	0	0	2.1783e+06	0	0	0	0	0	0	0	3.23418e+06	0	1.22934e+06	0	0	0	125606	0	0	0	0	261751	0	0	0	0
	P14174	MIF_HUMAN	Macrophage migration inhibitory factor (MIF) (EC 5.3.2.1) (Glycosylation-inhibiting factor) (GIF) (L-dopachrome isomerase) (L-dopachrome tautomerase) (EC 5.3.3.12) (Phenylpyruvate tautomerase)	0	0	0	0	0	0	3286175	0	0	0	0	0	0	0	0	0	0	0	0	1.05756e+06	0	0	0	0	0	0	0	0	0	0	0	0	0	0	0	0	0	0	0	0	0	0	0	0	0	0
	P40121	CAPG_HUMAN	Macrophage-capping protein (Actin regulatory protein CAP-G)	1.16505e+06	0	1.20669e+06	0	552034	0	540908	0	0	837603	0	744453	729984	0	0	486787	0	0	0	0	805292	335208	1.50641e+06	3.21262e+06	0	0	0	0	0	0	4.37134e+06	0	1.98535e+06	0	0	0	0	0	0	0	0	0	0	0	0	0
	P04156	PRIO_HUMAN	Major prion protein (PrP) (ASCR) (PrP27-30) (PrP33-35C) (CD antigen CD230)	7.96586e+06	9.29008e+06	1.92839e+06	929580	1.69299e+06	1.3533e+06	1.98783e+06	0	0	6.9415e+06	3.43364e+06	0	1.25433e+06	0	1.07276e+06	915501	1.80778e+06	1.00918e+06	1.70199e+06	607890	5.54879e+06	0	8.57319e+06	1.32014e+06	7.15879e+06	1.91239e+06	0	0	1.7174e+06	0	4.88695e+06	0	1.23411e+07	14547267	4.59839e+06	6.63747e+06	6.65742e+06	7.27308e+06	5.68413e+06	3.24966e+06	1.84786e+06	3.64878e+06	2.59144e+06	6.00801e+06	3.32201e+06	6.16309e+06
	P40925	MDHC_HUMAN	Malate dehydrogenase, cytoplasmic (EC 1.1.1.37) (Cytosolic malate dehydrogenase) (Diiodophenylpyruvate reductase) (EC 1.1.1.96)	2.17631e+06	1.00008e+06	2.21589e+06	0	526226	0	1.83239e+06	0	0	966378	0	1.13329e+06	1.02683e+06	261733	502472	792223	1.06982e+06	434784	193907	547771	1.12849e+06	1.38861e+06	4.531e+06	2.99195e+06	876525	0	571389	0	0	0	4248502	0	5.15748e+06	0	0	702798	516632	619218	804476	0	0	723068	415425	921314	678434	723028
	Q9UM22	EPDR1_HUMAN	Mammalian ependymin-related protein 1 (MERP-1) (Upregulated in colorectal cancer gene 1 protein)	0	0	0	0	0	0	0	0	0	0	0	0	0	0	0	0	0	0	0	0	0	0	0	0	0	0	0	0	0	0	0	0	0	0	0	0	0	0	524496	0	0	0	0	0	506859	0
	P11226	MBL2_HUMAN	Mannose-binding protein C (MBP-C) (Collectin-1) (MBP1) (Mannan-binding protein) (Mannose-binding lectin)	0	0	0	0	0	0	0	0	0	0	0	0	0	0	0	930929	0	673672	0	0	0	0	0	0	0	0	0	0	0	0	0	0	0	0	0	0	0	0	0	0	0	0	0	0	0	0
	P33908	MA1A1_HUMAN	Mannosyl-oligosaccharide 1,2-alpha-mannosidase IA (EC 3.2.1.113) (Man(9)-alpha-mannosidase) (Man9-mannosidase) (Mannosidase alpha class 1A member 1) (Processing alpha-1,2-mannosidase IA) (Alpha-1,2-mannosidase IA)	2.0179e+06	1212121	525526	0	915720	275779	412127	0	3.61043e+06	0	0	0	312242	0	0	0	1.01872e+06	244631	388497	275023	1.16725e+06	0	1.68784e+06	0	1.98908e+06	0	0	98485.8	0	882679	2.82627e+06	1.80634e+06	2.79056e+06	1.01901e+07	0	1.09443e+06	735379	996685	1.40419e+06	824454	847997	1.5921e+06	470674	1.19078e+06	904502	935751
	P08493	MGP_HUMAN	Matrix Gla protein (MGP) (Cell growth-inhibiting gene 36 protein)	2.34441e+06	0	0	0	0	0	0	0	0	5.06949e+06	0	0	0	0	0	0	0	1.08393e+06	0	0	2.54931e+06	0	0	0	0	0	0	0	1.30719e+06	0	0	0	0	0	0	0	0	0	0	0	0	0	0	0	0	1.46215e+06
	P14780	MMP9_HUMAN	Matrix metalloproteinase-9 (MMP-9) (EC 3.4.24.35) (92 kDa gelatinase) (92 kDa type IV collagenase) (Gelatinase B) (GELB) [Cleaved into: 67 kDa matrix metalloproteinase-9; 82 kDa matrix metalloproteinase-9]	557576	0	1.29763e+06	4.3056e+06	320452	1.35757e+06	6.97251e+06	425904	4.13319e+07	2.61948e+06	2.8872e+06	6.33401e+06	9.46332e+06	97405.5	7.38882e+06	7.07654e+06	1.42498e+07	2.34975e+06	0	7.53514e+06	1.59732e+06	1.39353e+07	2.94633e+06	8.4713e+06	250499	0	1.60099e+06	777033	0	178764	8.08291e+06	5.46258e+06	1.31418e+06	3.78517e+07	4.411e+07	9.36855e+06	0	0	0	0	0	0	0	0	0	0
	P01033	TIMP1_HUMAN	Metalloproteinase inhibitor 1 (Erythroid-potentiating activity) (EPA) (Fibroblast collagenase inhibitor) (Collagenase inhibitor) (Tissue inhibitor of metalloproteinases 1) (TIMP-1)	32682231	3.81113e+06	7.35932e+06	1.42009e+06	7.26562e+06	6.17224e+06	2.50323e+06	1.24308e+06	1.4547e+07	1.94752e+07	6.11775e+06	1.72094e+07	5.65729e+06	831662	1.0022e+07	4.71563e+06	1.79079e+07	2.24692e+07	2.91684e+06	3.83938e+06	4.32884e+07	7.72056e+06	3.17909e+07	0	2.11954e+06	3.20439e+06	662005	685979	2.74004e+06	1.07188e+07	7.17022e+07	8.52607e+06	1.14961e+08	2.07165e+07	2.26947e+07	2.01809e+06	1.73774e+06	2.89721e+06	3.33118e+06	2.96166e+06	0	2.51827e+06	828314	2.50553e+06	1.12117e+06	1.99076e+06
	P16035	TIMP2_HUMAN	Metalloproteinase inhibitor 2 (CSC-21K) (Tissue inhibitor of metalloproteinases 2) (TIMP-2)	0	2.006e+06	0	0	907233	0	540253	0	2.76684e+07	3.34365e+06	0	0	609632	0	834355	0	0	807793	1.01213e+06	518040	1.34605e+06	0	0	0	0	0	0	0	0	0	0	0	3.85495e+06	0	0	1.15517e+06	1.36725e+06	1.42435e+06	1.26983e+06	0	0	1.18848e+06	722618	1.78865e+06	1.28053e+06	1.18899e+06
	P25713	MT3_HUMAN	Metallothionein-3 (MT-3) (GIFB) (GIF) (Growth inhibitory factor) (Metallothionein-III) (MT-III)	0	0	0	0	0	0	0	0	0	0	0	0	0	0	0	0	0	0	0	0	161372	0	0	0	0	0	0	0	0	0	0	0	1.52293e+06	0	0	1.75741e+06	0	1.64652e+06	0	0	0	898384	0	0	0	0
	P55083	MFAP4_HUMAN	Microfibril-associated glycoprotein 4	0	2.13896e+06	0	0	0	0	0	0	0	0	0	0	0	0	0	0	0	0	0	0	0	0	0	0	1.09277e+06	0	0	0	0	0	0	0	0	0	0	406960	0	1.63438e+06	716603	930153	0	1.30771e+06	256189	1.59124e+06	510809	937772
	P11137	MTAP2_HUMAN	Microtubule-associated protein 2 (MAP-2)	0	0	0	0	0	0	0	0	0	0	0	0	0	0	0	0	0	0	0	0	0	0	0	0	0	0	0	0	0	0	0	0	0	0	0	0	0	0	0	0	0	0	0	0	0	0
	P20774	MIME_HUMAN	Mimecan (Osteoglycin) (Osteoinductive factor) (OIF)	1.773e+06	5.26088e+06	0	1.17293e+06	2.11367e+06	0	0	0	0	2.92551e+06	1.36218e+06	834389	1.1518e+06	0	1.5019e+06	0	909432	702622	1.93024e+06	0	1.23419e+06	703780	2.76837e+06	2.14056e+06	6.16281e+06	562312	0	0	912905	2.18551e+06	7.3882e+06	1.13856e+06	8.2504e+06	9.31924e+06	0	3.05631e+06	2.12272e+06	4.87476e+06	4.13538e+06	3.49672e+06	3.26731e+06	4.12296e+06	2.78474e+06	7.49961e+06	3.8306e+06	4.57605e+06
	P26038	MOES_HUMAN	Moesin (Membrane-organizing extension spike protein)	3.40283e+06	0	973623	700867	1.40882e+06	281942	1.04977e+06	0	0	1.29146e+06	779672	2.60124e+06	1.51931e+06	0	0	796478	888999	0	0	305811	1.16798e+06	1.30794e+06	6.14005e+06	4.93693e+06	0	0	319559	0	0	994635	7.09067e+06	0	9.33162e+06	3.12806e+06	2.22826e+06	0	0	0	0	0	0	0	0	0	0	0
	P08571	CD14_HUMAN	Monocyte differentiation antigen CD14 (Myeloid cell-specific leucine-rich glycoprotein) (CD antigen CD14) [Cleaved into: Monocyte differentiation antigen CD14, urinary form; Monocyte differentiation antigen CD14, membrane-bound form]	1.29249e+07	6.55881e+06	3.73508e+06	1.20911e+06	4.42939e+06	2.12495e+06	2.32335e+06	639040	1.82549e+07	2.30402e+07	5.23838e+06	6.73541e+06	4.06241e+06	277363	3.11099e+06	1.43882e+06	5.5694e+06	5.1459e+06	3.90262e+06	1.95473e+06	7.07236e+06	2.74636e+06	2.53779e+07	1.4919e+06	3.83061e+06	8.82365e+06	565971	802513	3.52172e+06	5.09043e+06	3.99786e+07	4.40495e+06	6.43954e+07	2.13627e+07	5.09868e+06	4.02206e+06	3.13671e+06	5.74868e+06	7.00603e+06	4.70986e+06	4.06546e+06	4.52234e+06	1.41632e+06	4.07228e+06	2.26541e+06	2.92453e+06
	Q9H8L6	MMRN2_HUMAN	Multimerin-2 (EMILIN-3) (Elastin microfibril interface located protein 3) (Elastin microfibril interfacer 3) (EndoGlyx-1 p125/p140 subunit)	867171	854793	0	0	0	0	0	0	0	0	0	0	0	0	0	0	0	0	0	0	0	0	0	0	0	0	0	0	0	0	0	0	2.44382e+06	2.00692e+06	0	645336	358293	737238	0	0	0	381915	0	0	0	0
	Q96KG7	MEG10_HUMAN	Multiple epidermal growth factor-like domains protein 10 (Multiple EGF-like domains protein 10)	0	0	0	0	0	0	0	0	0	0	0	0	0	0	0	0	0	0	0	0	0	0	0	0	0	0	0	0	0	0	0	0	0	0	0	405901	639992	691577	0	0	0	436265	0	184403	118107	0
	Q7Z7M0	MEGF8_HUMAN	Multiple epidermal growth factor-like domains protein 8 (Multiple EGF-like domains protein 8) (Epidermal growth factor-like protein 4) (EGF-like protein 4)	1.3695e+06	1.23014e+06	0	0	375044	0	2.39739e+06	0	0	0	0	0	0	0	0	0	0	0	231032	0	285720	0	1.0596e+06	0	810605	0	865129	0	0	289330	0	397510	2.87724e+06	1.54901e+06	0	665699	703293	1.31236e+06	1.08908e+06	599146	749003	857058	426564	523006	458716	741669
	Q9UNW1	MINP1_HUMAN	Multiple inositol polyphosphate phosphatase 1 (EC 3.1.3.62) (2,3-bisphosphoglycerate 3-phosphatase) (2,3-BPG phosphatase) (EC 3.1.3.80) (Inositol (1,3,4,5)-tetrakisphosphate 3-phosphatase) (Ins(1,3,4,5)P(4) 3-phosphatase)	0	0	0	0	0	0	0	0	0	0	0	0	0	0	0	0	0	0	0	0	0	0	0	0	0	0	0	0	0	0	0	0	0	0	0	0	0	0	0	0	0	0	0	0	0	0
	P02686	MBP_HUMAN	Myelin basic protein (MBP) (Myelin A1 protein) (Myelin membrane encephalitogenic protein)	0	0	4.99003e+06	0	0	0	2.28118e+06	0	0	0	0	0	0	0	0	0	0	0	0	0	0	0	0	0	0	0	0	0	0	0	0	0	0	0	0	0	0	0	0	0	0	0	0	0	0	0
	P60201	MYPR_HUMAN	Myelin proteolipid protein (PLP) (Lipophilin)	0	0	4.45535e+06	0	0	0	2.73504e+06	0	0	0	0	0	0	0	0	0	0	0	0	0	0	0	0	0	0	0	0	0	0	0	0	0	0	0	0	0	0	0	0	0	0	0	0	0	0	0
	P20916	MAG_HUMAN	Myelin-associated glycoprotein (Siglec-4a)	0	0	0	0	0	0	0	0	0	0	0	0	0	0	0	0	0	0	0	0	0	0	0	0	0	0	0	0	0	0	0	0	0	0	0	0	0	0	0	0	0	0	0	0	0	0
	Q16653	MOG_HUMAN	Myelin-oligodendrocyte glycoprotein	0	0	0	0	0	0	0	0	0	0	0	0	0	0	0	0	0	0	374656	0	0	0	0	0	0	0	0	0	0	0	0	0	0	0	0	0	760192	1.53251e+06	0	0	0	0	0	0	0	0
	P24158	PRTN3_HUMAN	Myeloblastin (EC 3.4.21.76) (AGP7) (C-ANCA antigen) (Leukocyte proteinase 3) (PR-3) (PR3) (Neutrophil proteinase 4) (NP-4) (P29) (Wegener autoantigen)	2.26689e+07	0	7.02314e+06	9.23744e+06	2.92772e+06	2.31042e+06	1.44619e+07	562706	3.78483e+07	4.86517e+06	1.52885e+07	2.41033e+07	1.18825e+07	0	2.07448e+06	14029051	4.36519e+06	1.94685e+06	0	1.05929e+07	9.92415e+06	9.15277e+06	1.94812e+07	3.24666e+07	0	2.17434e+06	2.52482e+06	2.15625e+06	1459190	5.50026e+06	5.10216e+07	4290572	4.52299e+07	1.70217e+07	4.54268e+07	0	0	0	0	0	652168	0	0	0	0	0
	P41218	MNDA_HUMAN	Myeloid cell nuclear differentiation antigen	934486	0	0	1.27363e+06	0	96592.3	869634	0	0	823088	0	1.04235e+06	1.17209e+06	0	0	0	0	0	0	0	1.14866e+06	1.60278e+06	715478	7.54457e+06	0	0	0	0	0	0	2.21074e+06	0	1.74393e+06	0	0	0	0	0	0	0	0	0	0	0	0	0
	P05164	PERM_HUMAN	Myeloperoxidase (MPO) (EC 1.11.2.2) [Cleaved into: Myeloperoxidase; 89 kDa myeloperoxidase; 84 kDa myeloperoxidase; Myeloperoxidase light chain; Myeloperoxidase heavy chain]	2.7014e+06	0	8.11215e+06	2.97842e+06	1.74559e+06	1.25431e+06	4.50595e+06	0	1.1846e+07	2.98942e+06	4.97113e+06	6.44362e+06	5.80464e+06	0	915858	5.7152e+06	2.82655e+06	1.11067e+06	0	3.19585e+06	1.97695e+06	2.98524e+06	4.07054e+06	6.59545e+06	0	1.08463e+06	587059	808197	485243	1.87454e+06	1.88825e+07	857241	3.18784e+06	4.81631e+06	8.85895e+06	0	0	0	0	0	0	0	0	0	0	0
	P02144	MYG_HUMAN	Myoglobin	0	0	0	0	0	0	0	0	0	8.0804e+06	0	0	0	0	0	0	0	0	540841	0	0	0	0	0	0	0	0	0	862171	0	2.79904e+06	0	0	0	0	0	0	0	0	0	0	0	0	0	0	0
	P60660	MYL6_HUMAN	Myosin light polypeptide 6 (17 kDa myosin light chain) (LC17) (Myosin light chain 3) (MLC-3) (Myosin light chain alkali 3) (Myosin light chain A3) (Smooth muscle and nonmuscle myosin light chain alkali 6)	1.45678e+06	0	0	0	336428	0	1.01239e+06	0	0	0	0	0	583582	0	0	467743	0	0	0	0	891915	1.08511e+06	0	5.37743e+06	0	0	0	0	0	0	4.38035e+06	0	3.8979e+06	0	0	0	0	0	0	0	0	0	0	0	0	0
	P35579	MYH9_HUMAN	Myosin-9 (Cellular myosin heavy chain, type A) (Myosin heavy chain 9) (Myosin heavy chain, non-muscle IIa) (Non-muscle myosin heavy chain A) (NMMHC-A) (Non-muscle myosin heavy chain IIa) (NMMHC II-a) (NMMHC-IIA)	836623	0	728899	836017	366389	0	356380	0	1.78108e+06	606588	0	671093	663504	0	0	469764	0	0	0	0	869263	749624	650101	4.16937e+06	0	0	0	0	0	0	1.98168e+06	0	2.10556e+06	8.09278e+06	0	1.26686e+06	0	0	0	0	0	0	0	0	0	0
	P29966	MARCS_HUMAN	Myristoylated alanine-rich C-kinase substrate (MARCKS) (Protein kinase C substrate, 80 kDa protein, light chain) (80K-L protein) (PKCSL)	0	153928	1.71722e+06	0	317233	0	0	0	0	0	0	0	0	0	0	0	0	0	0	0	0	0	687544	0	0	0	0	0	0	0	1.86352e+06	0	2.91653e+06	0	0	0	0	0	0	0	0	0	0	0	0	0
	Q9UJJ9	GNPTG_HUMAN	N-acetylglucosamine-1-phosphotransferase subunit gamma (GlcNAc-1-phosphotransferase subunit gamma) (UDP-N-acetylglucosamine-1-phosphotransferase subunit gamma)	674921	0	0	0	0	0	0	0	0	0	0	0	0	0	0	0	0	0	0	0	0	0	0	0	0	0	0	0	0	0	0	0	0	0	0	0	0	0	0	0	0	0	0	0	0	0
	Q96PD5	PGRP2_HUMAN	N-acetylmuramoyl-L-alanine amidase (EC 3.5.1.28) (Peptidoglycan recognition protein 2) (Peptidoglycan recognition protein long) (PGRP-L)	3.15866e+06	940775	1.86987e+06	1.50848e+06	195770	685713	1.4158e+06	307115	1.03504e+07	3.40199e+06	997392	6.35152e+06	3.371e+06	0	3.09564e+06	3.25556e+06	4.64109e+06	1.56661e+06	546822	886688	3.03406e+06	1.85484e+06	5.67069e+06	1.50409e+06	934171	590797	378510	250643	359639	1.71838e+06	2.309e+06	4.79002e+06	3.59549e+06	4.55967e+07	1.75725e+07	1.41756e+06	927618	1.34771e+06	2.23955e+06	1.89498e+06	1.25374e+06	938010	676993	1.7374e+06	1.17206e+06	797158
	P20933	ASPG_HUMAN	N(4)-(beta-N-acetylglucosaminyl)-L-asparaginase (EC 3.5.1.26) (Aspartylglucosaminidase) (Glycosylasparaginase) (N4-(N-acetyl-beta-glucosaminyl)-L-asparagine amidase) [Cleaved into: Glycosylasparaginase alpha chain; Glycosylasparaginase beta chain]	0	0	0	0	339953	0	417604	0	0	0	0	0	0	0	0	0	0	0	0	0	0	0	0	0	910960	0	0	0	0	0	0	0	0	0	0	0	0	0	722062	612111	0	0	343644	814305	714559	814089
	O94760	DDAH1_HUMAN	N(G),N(G)-dimethylarginine dimethylaminohydrolase 1 (DDAH-1) (Dimethylarginine dimethylaminohydrolase 1) (EC 3.5.3.18) (DDAHI) (Dimethylargininase-1)	0	0	0	0	0	0	2.19594e+06	0	0	0	0	0	0	200725	0	0	0	0	0	0	0	0	0	0	0	0	0	0	0	0	0	0	0	0	0	0	0	0	0	0	0	0	0	0	0	0
	Q92859	NEO1_HUMAN	Neogenin (Immunoglobulin superfamily DCC subclass member 2)	179629	1.21982e+06	0	0	347407	0	0	0	0	0	0	0	0	0	0	0	0	0	328636	0	335930	0	0	0	1.47259e+06	0	0	0	0	722452	1.44954e+06	0	1.65927e+06	0	0	979060	638870	1.06165e+06	1.43548e+06	1.08653e+06	708585	811489	624917	1.58454e+06	1.05455e+06	940866
	P13591	NCAM1_HUMAN	Neural cell adhesion molecule 1 (N-CAM-1) (NCAM-1) (CD antigen CD56)	2.91599e+06	4.21401e+06	1.16227e+06	717166	1.27001e+06	700124	1.2829e+06	0	3.40176e+06	2.87274e+06	1.95933e+06	1.39102e+06	831824	285116	854642	609974	879342	910390	1.20236e+06	606698	1.70103e+06	532735	4.12467e+06	1.1963e+06	4.38136e+06	771174	245584	0	846770	1.48239e+06	2.23285e+06	2.35485e+06	6.40791e+06	1.05708e+07	2.25092e+06	3.2969e+06	2.46821e+06	3.47642e+06	3.1115e+06	2.05116e+06	1.57278e+06	2.92794e+06	1.54868e+06	3.95907e+06	2.66986e+06	2.90732e+06
	O15394	NCAM2_HUMAN	Neural cell adhesion molecule 2 (N-CAM-2) (NCAM-2)	598091	1.74058e+06	0	0	608889	630970	664050	0	926246	0	0	0	0	0	0	0	0	204684	504709	0	546006	0	1.35683e+06	0	1.40444e+06	0	0	0	239228	0	0	691149	1.84873e+06	0	0	1.06804e+06	1.14644e+06	1.2399e+06	1.15244e+06	842036	453890	1.23517e+06	529500	1.12477e+06	767044	876776
	P32004	L1CAM_HUMAN	Neural cell adhesion molecule L1 (N-CAM-L1) (NCAM-L1) (CD antigen CD171)	428412	320269	0	0	117459	0	0	0	0	0	0	0	0	0	0	0	0	0	0	0	156458	0	0	0	668725	0	0	0	0	0	0	0	0	0	0	244377	244279	494215	409410	0	0	225858	284576	559915	312267	543379
	O00533	NCHL1_HUMAN	Neural cell adhesion molecule L1-like protein (Close homolog of L1) [Cleaved into: Processed neural cell adhesion molecule L1-like protein]	2.75061e+06	2.39885e+06	285240	331528	1.19078e+06	1.03439e+06	706667	0	2.14534e+06	2.25917e+06	1.90078e+06	0	1.02725e+06	0	4.74566e+06	3.87541e+06	3.53783e+06	2.23765e+06	980080	2.11501e+06	1.48198e+06	1.47009e+06	2.17381e+07	1.00491e+06	4.29095e+06	657915	1.36456e+06	0	657556	2.20271e+06	4.75678e+06	1.29359e+06	5.86619e+06	5.95314e+06	8.53109e+06	1.94381e+06	2.17204e+06	3.12495e+06	2.57387e+06	2.17053e+06	1.70209e+06	2.22695e+06	1.68051e+06	3.18069e+06	2.28399e+06	2.86408e+06
	Q9NQX5	NPDC1_HUMAN	Neural proliferation differentiation and control protein 1 (NPDC-1)	646493	0	0	0	0	0	0	0	0	0	0	0	0	0	0	0	0	0	0	0	0	0	0	0	1.13882e+06	0	0	0	0	0	0	0	0	0	0	305149	427480	612073	0	0	0	270574	0	0	270797	510197
	Q9ULB1	NRX1A_HUMAN	Neurexin-1 (Neurexin I-alpha) (Neurexin-1-alpha)	503359	1.11622e+06	0	0	219556	0	0	0	0	0	0	0	0	0	0	0	0	0	0	0	407464	0	0	0	1.96716e+06	0	0	0	0	399547	0	0	678835	0	0	686301	589166	944124	1.03899e+06	580833	0	613495	377632	893191	950844	1.39883e+06
	Q9P2S2	NRX2A_HUMAN	Neurexin-2 (Neurexin II-alpha) (Neurexin-2-alpha)	0	1.88238e+06	0	0	423369	0	0	0	0	0	0	0	0	0	0	0	0	0	388953	0	2.21913e+06	0	0	0	2.38341e+06	0	0	0	0	0	0	0	0	0	0	2.04308e+06	1.02083e+06	1.22873e+06	2.95095e+06	0	0	1.97844e+06	954546	2.14279e+06	1.61189e+06	1.44799e+06
	Q9Y4C0	NRX3A_HUMAN	Neurexin-3 (Neurexin III-alpha) (Neurexin-3-alpha)	0	856417	0	0	135922	0	0	0	0	0	0	0	0	0	0	0	0	0	132081	0	0	0	0	0	1.31166e+06	0	0	0	0	0	0	0	401048	0	0	741342	615891	972515	1.08881e+06	664726	0	599871	379248	939004	782177	929852
	O95158	NXPH4_HUMAN	Neurexophilin-4	0	0	0	0	0	0	0	0	0	0	0	0	0	0	0	0	0	0	0	0	0	0	0	0	0	0	0	0	0	0	0	0	0	0	0	1.50581e+06	0	0	0	0	0	0	574901	0	1.29184e+06	1.50063e+06
	Q9NPD7	NRN1_HUMAN	Neuritin	729658	1.12477e+06	0	0	183084	0	0	0	0	0	0	0	0	0	0	0	0	0	200885	0	0	0	0	0	995086	0	0	0	0	0	0	0	1.20736e+06	0	0	942464	457578	1.1096e+06	545201	376544	0	779669	0	1.10017e+06	658664	862130
	P41271	NBL1_HUMAN	Neuroblastoma suppressor of tumorigenicity 1 (DAN domain family member 1) (Protein N03) (Zinc finger protein DAN)	5.504e+06	1.20047e+07	0	0	3.7061e+06	0	0	0	0	0	0	0	1.03078e+06	0	1.77169e+06	0	0	1.43773e+06	6.0642e+06	635075	2.20354e+06	0	0	0	1.14098e+07	0	0	0	0	0	8.5938e+06	0	1.71864e+07	0	0	6.42105e+06	9.48057e+06	1.09578e+07	9471744	5.68997e+06	4.02486e+06	7.40297e+06	7.1924e+06	1.66256e+07	7.91746e+06	1.36648e+07
	O14594	NCAN_HUMAN	Neurocan core protein (Chondroitin sulfate proteoglycan 3)	710004	1.00054e+06	0	0	407442	0	0	0	0	0	0	0	0	0	0	0	0	0	384260	0	707923	0	0	0	2.05058e+06	0	0	0	0	569040	0	3.96166e+06	1.60782e+06	0	0	628196	820116	1.29257e+06	1.34443e+06	481236	407631	666720	645865	723272	1.21772e+06	1.33497e+06
	P29120	NEC1_HUMAN	Neuroendocrine convertase 1 (NEC 1) (EC 3.4.21.93) (Prohormone convertase 1) (Proprotein convertase 1) (PC1)	0	0	0	0	0	0	0	0	0	0	0	0	0	0	0	0	0	0	0	0	0	0	0	0	1.1897e+06	0	0	0	0	0	0	0	0	0	0	0	0	0	0	0	0	0	0	0	0	0
	P05408	7B2_HUMAN	Neuroendocrine protein 7B2 (Pituitary polypeptide) (Secretogranin V) (Secretogranin-5) (Secretory granule endocrine protein I) [Cleaved into: N-terminal peptide; C-terminal peptide]	8.80692e+06	1.26114e+07	1.46819e+06	0	3.62643e+06	1.27976e+06	3.16279e+06	0	0	0	0	0	865262	0	1.5576e+06	0	1.64561e+06	1.83769e+06	4.0163e+06	913156	3.05598e+06	0	773504	0	1.02047e+07	0	0	0	1.49746e+06	1.66045e+06	0	0	6.54768e+06	1.95681e+07	0	6.20858e+06	5.0955e+06	6.07436e+06	6.76688e+06	5.65759e+06	4.22563e+06	6.59609e+06	3.79063e+06	1.0366e+07	5.95159e+06	6.1239e+06
	O94856	NFASC_HUMAN	Neurofascin	789800	1.16359e+06	720495	0	314005	0	354924	0	0	0	238410	0	0	0	0	0	0	0	320252	0	1.92821e+06	1.94893e+06	1.44669e+06	0	1.69964e+06	178037	0	0	0	0	0	0	1.74787e+06	0	0	767919	868226	1.15514e+06	1.19868e+06	878856	386843	797381	384784	1.02125e+06	775632	965544
	P17677	NEUM_HUMAN	Neuromodulin (Axonal membrane protein GAP-43) (Growth-associated protein 43) (Neural phosphoprotein B-50) (pp46)	0	0	0	0	0	0	0	0	0	0	0	0	0	0	0	0	0	0	0	0	0	0	0	0	0	0	0	0	0	0	0	0	0	0	0	0	0	0	0	0	0	0	0	0	0	208648
	Q92823	NRCAM_HUMAN	Neuronal cell adhesion molecule (Nr-CAM) (Neuronal surface protein Bravo) (hBravo) (NgCAM-related cell adhesion molecule) (Ng-CAM-related)	2.31244e+06	4.15201e+06	633421	386295	1.6054e+06	327903	688267	0	2.06396e+06	2.16774e+06	1.26603e+06	482012	734125	166307	524723	381976	1.10979e+06	582395	1.12714e+06	307487	1.59825e+06	577807	3.28744e+06	1.32687e+06	5.25494e+06	537071	0	0	439301	1.24937e+06	0	1.18702e+06	5.40354e+06	6.64657e+06	1436280	2.96966e+06	2.99636e+06	3.93934e+06	2.61031e+06	2.21079e+06	1.63496e+06	3.05378e+06	1.39778e+06	3.26888e+06	2.55027e+06	3.21753e+06
	Q7Z3B1	NEGR1_HUMAN	Neuronal growth regulator 1 (IgLON family member 4)	990842	1.69457e+06	0	0	1.17262e+06	0	0	0	0	0	0	0	0	0	0	0	0	0	1.01425e+06	0	0	0	643235	0	2.80853e+06	0	0	0	0	0	0	0	2.49991e+06	0	0	1.34472e+06	1.2513e+06	1.94987e+06	0	0	0	1.29493e+06	848353	2.59731e+06	1.70925e+06	2.51317e+06
	O95502	NPTXR_HUMAN	Neuronal pentraxin receptor	1.64479e+06	1.84246e+06	0	0	1.07666e+06	0	502209	0	0	0	293819	0	0	0	0	0	0	0	316485	0	1.64686e+06	1.12876e+06	2.00568e+06	460284	4.05655e+06	0	0	0	271399	0	0	0	4.17939e+06	0	0	2.13671e+06	2.23267e+06	2.66309e+06	1.82231e+06	1.96627e+06	1.48582e+06	2.54481e+06	937962	2.70947e+06	2.12679e+06	3.40842e+06
	Q15818	NPTX1_HUMAN	Neuronal pentraxin-1 (NP1) (Neuronal pentraxin I) (NP-I)	1.43065e+06	1.52929e+06	0	0	462443	183555	0	0	0	0	0	0	0	0	0	0	0	0	546891	0	1.07847e+06	0	0	0	1.87867e+06	0	0	0	390025	0	0	1.84646e+06	2.242e+06	0	0	1.51695e+06	1.53714e+06	2.44515e+06	1.97361e+06	1.64603e+06	1.29628e+06	1.41219e+06	833615	1.63458e+06	1.40959e+06	1.52484e+06
	P47972	NPTX2_HUMAN	Neuronal pentraxin-2 (NP2) (Neuronal pentraxin II) (NP-II)	483117	0	0	0	0	0	0	0	0	0	0	0	0	0	0	0	0	0	0	0	0	0	0	0	0	0	0	0	0	0	0	0	0	0	0	0	245229	207893	732648	0	0	0	0	0	0	779495
	Q5BLP8	CD048_HUMAN	Neuropeptide-like protein C4orf48	0	0	0	0	0	0	0	0	0	0	0	0	0	0	0	0	0	0	0	0	0	0	0	0	5.60457e+06	0	0	0	0	0	0	0	0	0	0	2.6873e+06	2.41399e+06	3.74291e+06	0	0	0	1.87443e+06	1.66495e+06	0	0	2647084
	O14786	NRP1_HUMAN	Neuropilin-1 (Vascular endothelial cell growth factor 165 receptor) (CD antigen CD304)	251100	0	0	0	0	0	0	0	0	0	0	0	0	0	0	0	0	0	0	0	0	0	0	0	0	0	0	0	0	0	809109	142234	1.12561e+06	0	0	0	0	113557	0	0	0	104223	0	0	0	0
	O15240	VGF_HUMAN	Neurosecretory protein VGF [Cleaved into: Neuroendocrine regulatory peptide-1 (NERP-1); Neuroendocrine regulatory peptide-2 (NERP-2); Antimicrobial peptide VGF[554-577]]	3.75638e+06	2.34857e+06	0	0	1.3276e+06	571837	584956	0	0	1.46541e+06	946905	0	0	310392	0	0	2.73829e+06	746467	528382	290223	1.44604e+06	3.97769e+06	1.23608e+06	1422497	5.77074e+06	418627	0	0	453413	792313	742461	1.30001e+06	5.04969e+06	7.21751e+06	9.42079e+06	2.89039e+06	3.03464e+06	3.649e+06	3.31403e+06	1.68612e+06	1.05132e+06	2.0903e+06	1.41969e+06	3.86675e+06	2.01855e+06	3.24939e+06
	Q99574	NEUS_HUMAN	Neuroserpin (Peptidase inhibitor 12) (PI-12) (Serpin I1)	0	426605	0	0	0	0	0	0	0	0	0	0	0	0	0	0	0	0	110961	0	0	0	0	0	1.27395e+06	0	0	0	0	0	0	0	0	0	0	0	0	222100	503996	0	316707	0	278835	678416	496612	748149
	Q9P121	NTRI_HUMAN	Neurotrimin (hNT) (IgLON family member 2)	1.1187e+06	1.95138e+06	0	0	556292	0	0	0	0	1.47275e+06	1.42172e+06	0	0	0	0	0	0	0	415348	0	959925	0	1.33148e+06	0	2.64603e+06	178482	0	0	0	0	0	735191	3.68356e+06	0	0	2.73045e+06	2.24161e+06	4.14734e+06	2.40411e+06	951478	954470	2.53259e+06	652426	1.88244e+06	1.27299e+06	1.52154e+06
	P22894	MMP8_HUMAN	Neutrophil collagenase (EC 3.4.24.34) (Matrix metalloproteinase-8) (MMP-8) (PMNL collagenase) (PMNL-CL)	2.40129e+06	0	3.83969e+06	1.63e+06	635405	1.02591e+06	2.83166e+06	547507	2.45287e+07	2.41461e+06	3.83372e+06	4.42341e+06	4.71313e+06	0	1.52156e+06	2.43186e+06	6.54642e+06	1.23638e+06	0	6.4741e+06	2.89131e+06	3.55825e+06	5.24131e+06	5.35715e+06	0	792180	606711	722106	431874	1971614	6970277	7.62401e+06	7.06817e+06	2.26386e+07	2.59153e+07	0	0	0	0	0	0	0	0	0	0	0
	P19878	NCF2_HUMAN	Neutrophil cytosol factor 2 (NCF-2) (67 kDa neutrophil oxidase factor) (NADPH oxidase activator 2) (Neutrophil NADPH oxidase factor 2) (p67-phox)	1.33876e+06	0	0	0	0	0	0	0	0	0	0	0	0	0	0	0	0	0	0	0	437481	0	0	2.35329e+06	0	0	0	0	0	0	0	0	0	0	0	0	0	0	0	0	0	0	0	0	0	0
	P08246	ELNE_HUMAN	Neutrophil elastase (EC 3.4.21.37) (Bone marrow serine protease) (Elastase-2) (Human leukocyte elastase) (HLE) (Medullasin) (PMN elastase)	5.67111e+06	0	4.09417e+06	2.85278e+06	3.01331e+06	688786	5.70806e+06	0	1.84873e+07	3.11348e+06	2.15104e+06	8.66016e+06	6.03473e+06	0	517887	5.17711e+06	2.17333e+06	1.11546e+06	0	3.77112e+06	8.71939e+06	6.77258e+06	5.48347e+06	1.83769e+07	0	798557	878905	723602	250908	1.79641e+06	2.38483e+07	1.71513e+06	1.07999e+07	4.90659e+06	1.17662e+07	0	0	0	0	0	0	0	0	0	0	0
	P80188	NGAL_HUMAN	Neutrophil gelatinase-associated lipocalin (NGAL) (25 kDa alpha-2-microglobulin-related subunit of MMP-9) (Lipocalin-2) (Oncogene 24p3) (Siderocalin LCN2) (p25)	4.02413e+06	0	4.93701e+06	6.40684e+06	2.88648e+06	3.44902e+06	1.46138e+07	895568	3.58674e+07	6.8025e+06	9.01772e+06	1.57216e+07	2.15715e+07	642253	5.23871e+06	1.01575e+07	1.58231e+07	4.9144e+06	718851	7.63024e+06	7.91212e+06	1.7712e+07	1.13377e+07	1.51092e+07	0	2.29188e+06	2.31157e+06	2.34076e+06	1.36929e+06	8.47064e+06	2.69042e+07	1.40626e+07	1.64967e+07	3.67779e+07	5.50496e+07	0	0	0	0	0	0	0	0	0	0	0
	P43490	NAMPT_HUMAN	Nicotinamide phosphoribosyltransferase (NAmPRTase) (Nampt) (EC 2.4.2.12) (Pre-B-cell colony-enhancing factor 1) (Pre-B cell-enhancing factor) (Visfatin)	1.18351e+06	0	2356606	0	0	0	1.90138e+06	0	0	0	0	2.39995e+06	2.63101e+06	0	0	0	0	0	0	0	1.14608e+06	755512	4.60966e+06	2.80662e+06	0	0	0	0	0	0	6.46297e+06	0	4.1783e+06	0	0	0	0	0	0	0	0	0	0	0	0	0
	P14543	NID1_HUMAN	Nidogen-1 (NID-1) (Entactin)	662399	699686	0	0	923123	0	0	0	0	0	0	0	0	0	0	0	0	80908.9	281024	0	187522	0	640645	0	635771	135105	0	0	0	1.54852e+06	1.71706e+06	0	1.91373e+06	0	0	293983	224077	354180	504109	306097	0	320817	301894	429161	277361	556614
	Q14112	NID2_HUMAN	Nidogen-2 (NID-2) (Osteonidogen)	0	647638	0	0	582301	0	0	0	0	0	0	0	0	0	0	0	0	0	0	0	0	0	0	0	402405	0	0	0	0	0	914097	0	1.33298e+06	0	0	293553	0	324800	593959	0	0	0	0	0	0	476595
	P10153	RNAS2_HUMAN	Non-secretory ribonuclease (EC 3.1.27.5) (Eosinophil-derived neurotoxin) (RNase UpI-2) (Ribonuclease 2) (RNase 2) (Ribonuclease US)	917485	1.15361e+06	1.71947e+06	0	1.07549e+06	658982	1.51052e+06	0	3.39151e+06	3.18443e+06	1.40752e+06	0	1.60048e+06	0	0	1.15746e+06	1.37808e+06	762251	1.47017e+06	1.08145e+06	1.35365e+06	0	1.8113e+06	966732	0	1.29369e+06	0	553310	586004	1.67974e+06	9.96916e+06	0	6.28389e+06	0	0	0	0	0	0	0	0	0	0	0	0	0
	Q02818	NUCB1_HUMAN	Nucleobindin-1 (CALNUC)	2.81813e+06	929616	592319	0	496602	315503	312763	0	707548	686983	322044	0	633880	0	239059	281068	471733	372005	263928	203262	921680	373642	4.4758e+06	0	795405	165576	0	0	325253	853227	1.63775e+06	703863	2.75438e+06	1.95656e+06	0	478879	484203	798657	833604	457185	419472	474993	406773	835368	520893	711740
	P06748	NPM_HUMAN	Nucleophosmin (NPM) (Nucleolar phosphoprotein B23) (Nucleolar protein NO38) (Numatrin)	553161	0	0	0	0	0	0	0	0	0	0	0	0	0	0	0	0	0	0	0	0	0	1.18358e+06	0	0	0	0	0	0	0	0	0	0	0	0	0	0	0	0	0	0	0	0	0	0	0
	Q6UX06	OLFM4_HUMAN	Olfactomedin-4 (OLM4) (Antiapoptotic protein GW112) (G-CSF-stimulated clone 1 protein) (hGC-1) (hOLfD)	2.0834e+06	0	0	2.08642e+06	0	0	3.13228e+06	0	7.08056e+06	0	2.85318e+06	1.61025e+06	2.95646e+06	0	0	1.72628e+06	2.22337e+06	0	0	0	1.24159e+06	1.3482e+06	2.51509e+06	8.47321e+06	0	0	0	574332	0	0	3.92377e+06	2.37084e+06	2.74824e+06	0	1.5857e+07	0	0	0	0	0	0	0	0	0	0	0
	Q9NRN5	OLFL3_HUMAN	Olfactomedin-like protein 3 (HNOEL-iso) (hOLF44)	0	357548	0	0	0	0	0	0	0	0	0	0	0	0	0	0	0	0	0	0	0	0	0	0	664146	0	0	0	0	431922	0	0	0	0	0	287197	262977	489138	607406	0	0	0	0	724456	0	511793
	P23515	OMGP_HUMAN	Oligodendrocyte-myelin glycoprotein	0	1.94385e+06	0	0	409779	0	0	0	0	0	0	0	0	0	0	0	0	0	896085	0	414456	0	0	0	2.65624e+06	0	0	0	0	0	0	0	0	0	0	2.57635e+06	978541	2.43574e+06	4.00236e+06	0	0	1.96531e+06	0	2.25295e+06	2.32773e+06	2.87272e+06
	Q14982	OPCM_HUMAN	Opioid-binding protein/cell adhesion molecule (OBCAM) (OPCML) (Opioid-binding cell adhesion molecule) (IgLON family member 1)	1.27895e+06	2.05187e+06	0	0	1.05597e+06	298653	316953	0	0	894133	981791	0	0	0	0	0	0	0	472090	0	734675	0	1.12699e+06	0	3.89452e+06	0	0	0	0	378583	0	325492	3.35778e+06	0	0	1.74664e+06	1.54607e+06	2.17258e+06	1.65112e+06	1.01787e+06	648353	1.26094e+06	829925	1.8726e+06	1.53598e+06	1.9388e+06
	Q92882	OSTF1_HUMAN	Osteoclast-stimulating factor 1	0	0	0	195216	0	0	0	0	0	0	0	0	0	0	0	0	0	0	0	0	0	0	0	0	0	0	0	0	0	0	0	0	0	0	0	0	0	0	0	0	0	0	0	0	0	0
	Q99983	OMD_HUMAN	Osteomodulin (Keratan sulfate proteoglycan osteomodulin) (KSPG osteomodulin) (Osteoadherin) (OSAD)	0	1.30241e+06	0	0	620260	0	0	0	0	0	0	0	0	0	0	0	0	0	661536	0	565831	0	0	0	0	0	0	0	0	709000	0	0	1.9971e+06	0	0	646985	755605	1.1562e+06	0	909017	0	1.03283e+06	633325	1.5034e+06	921328	1.23862e+06
	P10451	OSTP_HUMAN	Osteopontin (Bone sialoprotein 1) (Nephropontin) (Secreted phosphoprotein 1) (SPP-1) (Urinary stone protein) (Uropontin)	2.70913e+07	1.03162e+07	1.40891e+07	0	3.47e+06	5.09113e+06	3.13942e+06	616734	8.993e+06	1.20796e+07	4.48472e+06	5.61183e+06	3.99774e+06	3.14384e+06	4.65701e+06	2.66006e+06	7.10093e+06	6.40018e+06	5.17293e+06	2.14408e+06	1.35004e+07	2.04429e+06	4.35512e+07	0	7.79732e+06	6.2345e+06	1.13769e+06	1.04298e+06	4.27773e+06	1.15914e+07	4.45693e+07	9.8214e+06	4.81947e+07	1.16616e+07	2.42919e+06	5.90744e+06	6.25774e+06	8.05423e+06	5.1328e+06	4.03622e+06	2.6444e+06	8.19463e+06	2.3135e+06	6.5437e+06	4.10868e+06	3.55781e+06
	Q86UD1	OAF_HUMAN	Out at first protein homolog (HCV NS5A-transactivated protein 13 target protein 2)	782876	0	0	0	0	0	0	0	0	0	0	0	0	0	0	0	0	0	0	0	0	0	912993	0	0	0	0	0	0	0	0	0	0	0	0	0	0	0	0	0	0	0	0	0	0	0
	P26022	PTX3_HUMAN	Pentraxin-related protein PTX3 (Pentaxin-related protein PTX3) (Tumor necrosis factor alpha-induced protein 5) (TNF alpha-induced protein 5) (Tumor necrosis factor-inducible gene 14 protein) (TSG-14)	437368	0	0	491041	0	357487	1.83667e+06	202151	4.24289e+06	0	1.54048e+06	1.67767e+06	1.62085e+06	0	1.93901e+06	1102289	3.17126e+06	1.22351e+06	0	920023	1.21888e+06	1.97498e+06	1.12528e+06	637134	0	0	479859	347200	0	1.07924e+06	0	2.77311e+06	1.43799e+06	1.0463e+07	6.97395e+06	0	0	0	0	0	0	0	0	0	0	0
	Q6UXB8	PI16_HUMAN	Peptidase inhibitor 16 (PI-16) (Cysteine-rich secretory protein 9) (CRISP-9) (PSP94-binding protein)	0	1.49978e+06	0	0	481875	0	0	0	0	0	0	0	0	0	0	0	0	0	434352	0	0	0	1.02804e+06	0	1.4866e+06	0	0	0	0	0	6.28219e+06	0	916169	0	0	632400	741457	803339	1.44549e+06	1.72229e+06	0	700297	502455	0	970187	1.20309e+06
	O75594	PGRP1_HUMAN	Peptidoglycan recognition protein 1 (Peptidoglycan recognition protein short) (PGRP-S)	7.5886e+06	0	1.07662e+06	4.09261e+06	1.19527e+06	1.28808e+06	8.7496e+06	480462	3.11993e+07	2.25932e+06	2.35875e+06	6.21749e+06	6.53003e+06	0	2.79884e+06	3.24438e+06	1.04513e+07	1.80597e+06	0	3.42537e+06	4.88643e+06	1.03607e+07	1.03942e+07	1.17946e+07	0	335076	767979	363718	204983	805912	1.56546e+07	7.57098e+06	1.56363e+07	3.61147e+07	6.25189e+07	0	0	0	0	0	0	0	0	0	0	0
	P19021	AMD_HUMAN	Peptidyl-glycine alpha-amidating monooxygenase (PAM) [Includes: Peptidylglycine alpha-hydroxylating monooxygenase (PHM) (EC 1.14.17.3); Peptidyl-alpha-hydroxyglycine alpha-amidating lyase (EC 4.3.2.5) (Peptidylamidoglycolate lyase) (PAL)]	1.38428e+06	1.04944e+06	0	0	726287	0	0	0	0	1.13424e+06	807953	0	0	0	0	0	0	0	0	0	712324	0	0	0	2.4614e+06	0	0	0	237243	0	0	0	1.40273e+06	0	0	641582	828366	1.19552e+06	1.31723e+06	998339	702849	687654	1.15316e+06	1.42838e+06	800064	1.37689e+06
	P62937	PPIA_HUMAN	Peptidyl-prolyl cis-trans isomerase A (PPIase A) (EC 5.2.1.8) (Cyclophilin A) (Cyclosporin A-binding protein) (Rotamase A) [Cleaved into: Peptidyl-prolyl cis-trans isomerase A, N-terminally processed]	3.43994e+06	0	2.72958e+06	827914	680289	1.34535e+06	3026011	0	0	1.73334e+06	452532	3.27241e+06	3.3658e+06	0	1.03611e+06	1.62734e+06	1.17314e+06	731023	0	747481	2.41695e+06	1.90609e+06	7.98068e+06	1.02625e+07	0	0	396121	0	0	1.39158e+06	9.46158e+06	701739	9.19044e+06	0	1.89194e+06	0	0	0	0	0	0	122633	0	0	0	0
	P23284	PPIB_HUMAN	Peptidyl-prolyl cis-trans isomerase B (PPIase B) (EC 5.2.1.8) (CYP-S1) (Cyclophilin B) (Rotamase B) (S-cyclophilin) (SCYLP)	338870	1.05717e+06	0	577508	349877	0	887778	0	0	1.72943e+06	0	0	0	0	0	0	876740	0	259725	0	1.21184e+06	0	0	1.23576e+06	964389	0	0	0	179938	0	2.74202e+06	0	0	0	0	1.05549e+06	573108	1.40109e+06	1.29029e+06	942182	372045	764463	0	1.23854e+06	838720	685271
	P62942	FKB1A_HUMAN	Peptidyl-prolyl cis-trans isomerase FKBP1A (PPIase FKBP1A) (EC 5.2.1.8) (12 kDa FK506-binding protein) (12 kDa FKBP) (FKBP-12) (Calstabin-1) (FK506-binding protein 1A) (FKBP-1A) (Immunophilin FKBP12) (Rotamase)	3.95603e+06	0	2.10455e+06	1.17687e+06	1.14604e+06	270293	1.86227e+06	0	0	1557944	0	4.86223e+06	2.76357e+06	0	0	1.36179e+06	0	0	0	488965	2.46439e+06	1.68469e+06	4.38498e+06	1.14614e+07	0	0	312523	0	126760	1.18381e+06	1.00435e+07	0	9.91186e+06	0	0	0	0	0	0	0	0	0	0	0	0	0
	Q15063	POSTN_HUMAN	Periostin (PN) (Osteoblast-specific factor 2) (OSF-2)	0	0	0	0	0	0	0	0	0	0	0	0	0	0	1.22779e+06	0	0	0	0	0	0	0	0	0	0	0	0	0	0	436289	0	0	0	0	0	0	0	0	0	0	0	0	0	0	0	0
	Q06830	PRDX1_HUMAN	Peroxiredoxin-1 (EC 1.11.1.15) (Natural killer cell-enhancing factor A) (NKEF-A) (Proliferation-associated gene protein) (PAG) (Thioredoxin peroxidase 2) (Thioredoxin-dependent peroxide reductase 2)	0	0	4.07705e+06	0	0	0	1.84041e+06	0	0	0	0	0	1.20238e+06	0	0	0	0	0	0	657268	0	739152	3.76978e+06	0	0	0	0	0	0	0	0	0	0	0	0	0	0	0	0	0	0	0	0	0	0	0
	P32119	PRDX2_HUMAN	Peroxiredoxin-2 (EC 1.11.1.15) (Natural killer cell-enhancing factor B) (NKEF-B) (PRP) (Thiol-specific antioxidant protein) (TSA) (Thioredoxin peroxidase 1) (Thioredoxin-dependent peroxide reductase 1)	0	0	1.11262e+07	0	0	0	1.82361e+06	0	0	5.67517e+06	2.12512e+06	0	0	0	988136	0	0	0	0	653244	0	646658	0	0	531146	0	0	0	0	0	0	0	0	0	0	382670	510614	514812	0	0	0	846724	0	0	0	0
	P30044	PRDX5_HUMAN	Peroxiredoxin-5, mitochondrial (EC 1.11.1.15) (Alu corepressor 1) (Antioxidant enzyme B166) (AOEB166) (Liver tissue 2D-page spot 71B) (PLP) (Peroxiredoxin V) (Prx-V) (Peroxisomal antioxidant enzyme) (TPx type VI) (Thioredoxin peroxidase PMP20) (Thioredoxin reductase)	0	0	0	0	0	0	882936	0	0	0	0	0	1265519	0	0	667416	720428	0	0	290971	525462	801887	0	4.54458e+06	0	0	0	0	0	0	0	0	0	0	0	0	0	0	0	0	0	0	0	0	0	0
	P30041	PRDX6_HUMAN	Peroxiredoxin-6 (EC 1.11.1.15) (1-Cys peroxiredoxin) (1-Cys PRX) (24 kDa protein) (Acidic calcium-independent phospholipase A2) (aiPLA2) (EC 3.1.1.-) (Antioxidant protein 2) (Liver 2D page spot 40) (Non-selenium glutathione peroxidase) (NSGPx) (EC 1.11.1.9) (Red blood cells page spot 12)	908319	0	2.24065e+06	0	0	0	1.34119e+06	0	0	958334	481677	604326	865239	0	0	568357	777163	536163	0	424242	695395	812336	1.5852e+06	1.46939e+06	0	0	270428	0	0	0	1.63987e+06	0	1.96569e+06	0	0	0	0	0	0	0	0	0	0	0	0	0
	P04180	LCAT_HUMAN	Phosphatidylcholine-sterol acyltransferase (EC 2.3.1.43) (Lecithin-cholesterol acyltransferase) (Phospholipid-cholesterol acyltransferase)	1.14377e+06	871734	0	891751	220306	343033	712829	0	6.94969e+06	1.93506e+06	665256	1.65906e+06	1.91777e+06	0	1.69973e+06	1.02672e+06	2.50472e+06	810704	293264	347169	1.089e+06	734785	2.05112e+06	1.04341e+06	1.58805e+06	383461	0	0	0	565086	1.25312e+06	2.51146e+06	0	1.35673e+07	4.27845e+06	940416	551756	1.21102e+06	2.40117e+06	1.70089e+06	1084333	995542	918851	2.2156e+06	1.98145e+06	2.46661e+06
	P30086	PEBP1_HUMAN	Phosphatidylethanolamine-binding protein 1 (PEBP-1) (HCNPpp) (Neuropolypeptide h3) (Prostatic-binding protein) (Raf kinase inhibitor protein) (RKIP) [Cleaved into: Hippocampal cholinergic neurostimulating peptide (HCNP)]	2.74153e+06	2.75146e+06	4.07423e+06	0	1.25165e+06	745562	3.45969e+06	0	0	2.1611e+06	1.60642e+06	1.01112e+06	2.29797e+06	627630	1.40416e+06	1.10575e+06	2.18299e+06	1.12061e+06	521605	1.65787e+06	1.78439e+06	1.55366e+06	5.98753e+06	0	3.29609e+06	0	886544	487041	458928	957306	4.14068e+06	1.39002e+06	3.55398e+06	4.02293e+06	3.2836e+06	2.00453e+06	1.34998e+06	2.04869e+06	1.69116e+06	1.73215e+06	928173	2.36148e+06	579921	2.03382e+06	1.33328e+06	1.60765e+06
	Q96S96	PEBP4_HUMAN	Phosphatidylethanolamine-binding protein 4 (PEBP-4) (hPEBP4) (Protein cousin-of-RKIP 1)	1.26232e+06	4.2347e+06	0	0	976436	0	736080	0	0	0	0	0	0	0	0	0	501096	0	649864	0	1.11618e+06	0	1.09901e+06	0	1.75198e+06	0	0	0	0	0	0	0	2.53091e+06	5.19658e+06	0	3.05816e+06	1.42985e+06	3.18209e+06	1.96735e+06	1.64175e+06	0	5.17496e+06	1.04591e+06	1.79767e+06	1.68838e+06	1.40666e+06
	P80108	PHLD_HUMAN	Phosphatidylinositol-glycan-specific phospholipase D (PI-G PLD) (EC 3.1.4.50) (Glycoprotein phospholipase D) (Glycosyl-phosphatidylinositol-specific phospholipase D) (GPI-PLD) (GPI-specific phospholipase D)	438521	0	742793	1.3489e+06	0	0	473914	0	3.74091e+06	988072	531546	1.47085e+06	1.09481e+06	0	1.67849e+06	1.1455e+06	1.39766e+06	620497	0	287536	609427	634292	1.47279e+06	935245	0	0	0	0	0	0	0	1.90294e+06	0	1.11699e+07	7.60217e+06	154606	173512	273488	174724	0	565604	194420	0	0	0	433560
	P36871	PGM1_HUMAN	Phosphoglucomutase-1 (PGM 1) (EC 5.4.2.2) (Glucose phosphomutase 1)	0	0	0	0	141562	0	0	0	0	0	0	0	0	0	0	0	0	0	0	0	0	336375	0	1.06199e+06	0	0	0	0	0	0	780260	0	1.57826e+06	0	0	0	0	0	0	0	0	0	0	0	0	0
	P00558	PGK1_HUMAN	Phosphoglycerate kinase 1 (EC 2.7.2.3) (Cell migration-inducing gene 10 protein) (Primer recognition protein 2) (PRP 2)	2.5962e+06	0	2.05187e+06	411372	1.56951e+06	363393	1.30208e+06	0	1.32467e+06	971516	576269	1.91395e+06	1.50474e+06	81551.7	467679	834336	558316	247142	0	386002	1.68094e+06	1.52967e+06	6.85624e+06	4.76163e+06	0	0	218574	0	0	892564	6.60244e+06	0	1.27909e+07	0	1.83536e+06	206733	90536	174566	0	0	0	188045	0	0	0	0
	P18669	PGAM1_HUMAN	Phosphoglycerate mutase 1 (EC 3.1.3.13) (EC 5.4.2.11) (EC 5.4.2.4) (BPG-dependent PGAM 1) (Phosphoglycerate mutase isozyme B) (PGAM-B)	1.92952e+06	0	2.15983e+06	0	520633	0	1.36361e+06	0	0	0	0	681158	1.13106e+06	0	278515	759748	815702	0	0	448868	1.00495e+06	1.25664e+06	4.12581e+06	4.16642e+06	0	0	0	0	0	299829	4.21738e+06	0	6.72912e+06	0	0	0	0	0	0	0	0	0	0	0	0	0
	Q96FE7	P3IP1_HUMAN	Phosphoinositide-3-kinase-interacting protein 1 (Kringle domain-containing protein HGFL)	4.21446e+06	6.7881e+06	1.61821e+06	0	2.45152e+06	0	1.07428e+06	0	0	3.79332e+06	0	0	0	0	0	0	0	673663	1.83595e+06	0	1.68625e+06	0	5.57381e+06	0	4.71177e+06	0	0	0	707281	1.36415e+06	0	1.4925e+06	6.16483e+06	9.46996e+06	0	4.61761e+06	3.08738e+06	5.15452e+06	5.49116e+06	3.0329e+06	1.79629e+06	6.11752e+06	1.89761e+06	4.54535e+06	3.67565e+06	3.47857e+06
	Q6P4A8	PLBL1_HUMAN	Phospholipase B-like 1 (EC 3.1.1.-) (LAMA-like protein 1) (Lamina ancestor homolog 1) (Phospholipase B domain-containing protein 1) [Cleaved into: Phospholipase B-like 1 chain A; Phospholipase B-like 1 chain B; Phospholipase B-like 1 chain C]	0	0	0	0	0	0	616762	0	0	0	0	0	390617	0	0	0	0	0	0	0	0	0	0	1.9399e+06	0	0	0	0	0	0	0	0	0	0	0	0	0	0	0	0	0	0	0	0	0	0
	Q8IV08	PLD3_HUMAN	Phospholipase D3 (PLD 3) (EC 3.1.4.4) (Choline phosphatase 3) (HindIII K4L homolog) (Hu-K4) (Phosphatidylcholine-hydrolyzing phospholipase D3)	0	666026	0	0	163298	0	0	0	0	0	0	0	0	0	0	0	0	0	0	0	0	0	0	0	1.02184e+06	0	0	0	0	0	0	0	0	0	0	329164	524437	689134	521612	0	0	362721	0	313805	304968	662795
	Q96BZ4	PLD4_HUMAN	Phospholipase D4 (PLD 4) (EC 3.1.4.4) (Choline phosphatase 4) (Phosphatidylcholine-hydrolyzing phospholipase D4)	0	0	0	0	0	0	0	0	0	0	0	0	0	0	0	0	0	0	0	0	0	0	0	0	534255	0	0	0	0	0	0	0	0	0	0	373004	0	220432	0	0	0	302310	233106	0	282427	79318.2
	P55058	PLTP_HUMAN	Phospholipid transfer protein (Lipid transfer protein II)	3.59222e+06	2.98635e+06	3.29983e+06	1.08309e+06	2.36086e+06	993486	1.23681e+06	0	4.05425e+06	3.71248e+06	3.22831e+06	2.98873e+06	1.41245e+06	0	1.86151e+06	806192	1.50902e+06	1.54729e+06	1.69651e+06	1.14264e+06	2.58857e+06	1.21425e+06	1.46112e+07	1.04501e+06	3.91425e+06	4.09437e+06	226505	357249	2.61321e+06	4738162	2.90328e+07	1.85357e+06	3.62368e+07	1.20888e+07	3.32678e+06	1.49456e+06	1.41036e+06	2.61762e+06	4.48346e+06	3.47361e+06	3.48839e+06	1.78563e+06	1.49347e+06	4.01036e+06	2.03123e+06	2.1053e+06
	P36955	PEDF_HUMAN	Pigment epithelium-derived factor (PEDF) (Cell proliferation-inducing gene 35 protein) (EPC-1) (Serpin F1)	1.27938e+07	1.85392e+07	1.08652e+07	3.8185e+06	9.88926e+06	6.25059e+06	9.06894e+06	1.78681e+06	2.26631e+07	1.42553e+07	1.21616e+07	1.08215e+07	7.8712e+06	7.18664e+06	1.35103e+07	8.30845e+06	1.24975e+07	1.03685e+07	1.09164e+07	7.39869e+06	1.29683e+07	9.11263e+06	1.8211e+07	4.93322e+06	1.53571e+07	4.32872e+06	3.91193e+06	1.70599e+06	2.93282e+06	8.35156e+06	3.38973e+07	1.3181e+07	2.91982e+07	5.71139e+07	3.88738e+07	1.01805e+07	8.54424e+06	1.40653e+07	1.1058e+07	1.10847e+07	9.90477e+06	1.34741e+07	8.90115e+06	2.34374e+07	1.2617e+07	1.33095e+07
	Q9BTY2	FUCO2_HUMAN	Plasma alpha-L-fucosidase (EC 3.2.1.51) (Alpha-L-fucoside fucohydrolase 2) (Alpha-L-fucosidase 2)	0	511289	0	0	0	0	0	0	0	0	0	0	0	0	0	0	0	0	0	0	0	0	0	0	0	0	0	0	0	0	0	0	0	0	0	0	0	0	0	0	0	507283	0	0	0	0
	P03952	KLKB1_HUMAN	Plasma kallikrein (EC 3.4.21.34) (Fletcher factor) (Kininogenin) (Plasma prekallikrein) (PKK) [Cleaved into: Plasma kallikrein heavy chain; Plasma kallikrein light chain]	1.8448e+06	616239	7.09553e+07	2.33233e+06	223320	626366	1.35344e+06	297217	1.30475e+07	3.4407e+06	1.54307e+06	4.11347e+06	2.68012e+06	0	3.14424e+06	2.28519e+06	3.43063e+06	1.2609e+06	428317	717345	1.55034e+06	1.63264e+06	5.08004e+06	2.89975e+06	380138	702252	442249	169470	385030	851173	3.18318e+06	3.10788e+06	2.40028e+06	2.58936e+07	3.40499e+08	935972	507156	3.06569e+07	2.92217e+07	1.57896e+06	1.31653e+06	924718	431678	905715	495123	845335
	P05155	IC1_HUMAN	Plasma protease C1 inhibitor (C1 Inh) (C1Inh) (C1 esterase inhibitor) (C1-inhibiting factor) (Serpin G1)	5.26951e+06	1.19422e+07	2.21563e+07	7.37458e+06	7.51604e+06	8.83445e+06	4.9428e+06	1.67515e+06	1.20153e+08	4.02443e+07	2.2533e+07	3.46421e+07	2.50932e+07	1.32365e+06	2.18135e+07	1.17925e+07	2.34506e+07	9.06596e+06	5.8114e+06	7.10292e+06	1.62935e+06	0	5.92661e+06	0	9.94383e+06	1.03731e+07	2.38395e+06	2.96271e+06	5.47743e+06	1.72626e+07	6.98006e+07	0	8.91089e+06	1.25276e+07	5.89957e+06	1.06951e+06	1.06163e+06	2.03084e+06	1.34545e+07	1.42802e+07	9.26216e+06	1.37546e+06	4.33737e+06	1.03903e+07	5.59594e+06	7.74377e+06
	P05154	IPSP_HUMAN	Plasma serine protease inhibitor (Acrosomal serine protease inhibitor) (Plasminogen activator inhibitor 3) (PAI-3) (PAI3) (Protein C inhibitor) (PCI) (Serpin A5)	0	920666	1.20822e+06	0	0	216982	391856	0	1.20319e+06	0	0	1.04563e+06	0	0	487701	520070	520900	0	346826	0	0	0	0	0	0	237667	0	0	0	715464	0	0	0	0	0	0	0	0	1.563e+06	1.06609e+06	672962	0	396252	824083	334789	830445
	P00747	PLMN_HUMAN	Plasminogen (EC 3.4.21.7) [Cleaved into: Plasmin heavy chain A; Activation peptide; Angiostatin; Plasmin heavy chain A, short form; Plasmin light chain B]	8.3597e+06	1.597e+06	3.1099e+06	5.26907e+06	717524	1.62367e+06	3.59943e+06	757898	4.1881e+07	9.47073e+06	4.21962e+06	1.16095e+07	6.13494e+06	292701	1.22445e+07	5.95093e+06	1.18049e+07	5.1794e+06	1.19822e+06	2.67478e+06	4.93932e+06	6.55942e+06	1.1796e+07	6.7709e+06	1.65503e+06	1.33151e+06	1.70842e+06	630145	1.03021e+06	1.54453e+06	6.30078e+06	1.01008e+07	7.60188e+06	9.91722e+07	4.41019e+07	3.25035e+06	2.16247e+06	3.41022e+06	4.27077e+06	2.85701e+06	2.84508e+06	1.84186e+06	1.91253e+06	3.6197e+06	2.03558e+06	3.53941e+06
	P05121	PAI1_HUMAN	Plasminogen activator inhibitor 1 (PAI) (PAI-1) (Endothelial plasminogen activator inhibitor) (Serpin E1)	0	0	928534	0	0	0	253758	0	0	0	0	0	422179	0	301428	0	534978	265820	0	0	0	0	0	0	0	0	0	0	0	0	0	0	0	0	0	0	0	0	0	0	0	0	0	0	0	0
	P13796	PLSL_HUMAN	Plastin-2 (L-plastin) (LC64P) (Lymphocyte cytosolic protein 1) (LCP-1)	5.41671e+06	0	2.5329e+06	1.28487e+06	2.04891e+06	524217	2.5196e+06	0	4.43281e+06	1.9021e+06	1.00582e+06	3.50447e+06	2.42295e+06	0	909598	1.87201e+06	971186	435508	0	574136	3.32635e+06	2.23985e+06	7.83862e+06	1.23966e+07	0	901526	308583	0	217763	1.45169e+06	2.3129e+07	1.02425e+06	1.65216e+07	1.79124e+06	2.33143e+06	0	0	374865	0	0	0	0	0	0	0	0
	P02775	CXCL7_HUMAN	Platelet basic protein (PBP) (C-X-C motif chemokine 7) (Leukocyte-derived growth factor) (LDGF) (Macrophage-derived growth factor) (MDGF) (Small-inducible cytokine B7) [Cleaved into: Connective tissue-activating peptide III (CTAP-III) (LA-PF4) (Low-affinity platelet factor IV); TC-2; Connective tissue-activating peptide III(1-81) (CTAP-III(1-81)); Beta-thromboglobulin (Beta-TG); Neutrophil-activa…	0	0	0	0	0	0	0	0	0	0	0	0	0	0	732842	0	0	0	0	0	0	0	0	0	0	0	0	0	0	0	0	0	0	0	0	0	0	0	0	0	0	0	0	0	0	0
	P01127	PDGFB_HUMAN	Platelet-derived growth factor subunit B (PDGF subunit B) (PDGF-2) (Platelet-derived growth factor B chain) (Platelet-derived growth factor beta polypeptide) (Proto-oncogene c-Sis) (Becaplermin)	0	2.43496e+06	0	0	0	0	0	0	0	0	0	0	0	0	0	0	0	0	0	0	0	0	0	0	0	0	0	0	0	0	0	0	0	0	0	0	0	0	0	0	0	0	0	0	0	0
	P08567	PLEK_HUMAN	Pleckstrin (Platelet 47 kDa protein) (p47)	0	0	0	0	0	0	0	0	0	0	0	0	787429	0	0	0	0	0	0	0	0	0	0	0	0	0	0	0	0	0	0	0	0	0	0	0	0	0	0	0	0	0	0	0	0	0
	P21246	PTN_HUMAN	Pleiotrophin (PTN) (Heparin-binding brain mitogen) (HBBM) (Heparin-binding growth factor 8) (HBGF-8) (Heparin-binding growth-associated molecule) (HB-GAM) (Heparin-binding neurite outgrowth-promoting factor 1) (HBNF-1) (Osteoblast-specific factor 1) (OSF-1)	2.1334e+06	0	0	0	0	0	0	0	0	0	0	0	0	0	0	0	0	0	0	0	1.42027e+06	0	2.62559e+06	0	0	0	0	0	0	0	0	0	0	9.77504e+06	0	0	557531	638993	0	0	0	0	0	0	0	0
	Q6UX71	PXDC2_HUMAN	Plexin domain-containing protein 2 (Tumor endothelial marker 7-related protein)	1.54e+06	1.25569e+06	0	0	660553	487404	557665	0	0	1.98314e+06	0	0	5.62268e+07	0	581210	0	363683	0	576255	0	946521	0	0	0	1.83732e+06	0	0	0	324881	718614	2.42555e+06	780946	2868581	0	0	613059	980981	1.34284e+06	1.40224e+06	990936	0	652297	612070	1.58825e+06	911696	862833
	O15031	PLXB2_HUMAN	Plexin-B2 (MM1)	0	869848	0	0	0	0	0	0	0	0	0	0	0	0	0	0	0	0	0	0	0	0	0	0	562764	0	0	0	0	0	0	0	0	0	0	279659	235701	542863	0	0	0	285336	0	0	0	0
	P15151	PVR_HUMAN	Poliovirus receptor (Nectin-like protein 5) (NECL-5) (CD antigen CD155)	0	0	0	0	0	0	0	0	0	0	0	0	0	0	0	0	0	0	0	0	0	0	0	0	0	0	0	0	0	0	0	0	0	0	0	0	0	1.23987e+06	0	0	0	0	0	0	0	0
	Q15365	PCBP1_HUMAN	Poly(rC)-binding protein 1 (Alpha-CP1) (Heterogeneous nuclear ribonucleoprotein E1) (hnRNP E1) (Nucleic acid-binding protein SUB2.3)	517745	0	0	0	0	0	0	0	0	0	0	0	0	0	0	0	0	0	0	0	0	0	0	0	0	0	0	0	0	0	0	0	0	0	0	0	0	0	0	0	0	0	0	0	0	0
	P01833	PIGR_HUMAN	Polymeric immunoglobulin receptor (PIgR) (Poly-Ig receptor) (Hepatocellular carcinoma-associated protein TB6) [Cleaved into: Secretory component]	0	0	0	0	0	0	0	0	0	0	0	0	0	0	452130	154235	0	0	0	0	0	0	0	0	0	0	0	0	0	0	864162	0	0	0	0	0	105341	134900	0	0	0	0	0	0	0	0
	P20742	PZP_HUMAN	Pregnancy zone protein (C3 and PZP-like alpha-2-macroglobulin domain-containing protein 6)	385243	0	0	0	0	0	874128	0	7.94612e+06	2.08363e+06	0	0	0	0	975816	0	1.61739e+06	293411	0	0	546044	0	1.08779e+06	1.40237e+06	0	551229	0	0	0	0	0	0	0	8.68636e+06	0	0	0	0	0	0	0	0	244041	207857	0	600854
	P09668	CATH_HUMAN	Pro-cathepsin H [Cleaved into: Cathepsin H mini chain; Cathepsin H (EC 3.4.22.16); Cathepsin H heavy chain; Cathepsin H light chain]	849138	0	0	0	302648	0	0	0	0	0	0	0	0	0	0	0	0	0	0	0	0	0	0	0	0	0	0	0	0	0	0	0	1.27361e+06	0	0	870579	546736	1.24395e+06	0	0	0	458289	0	0	0	0
	P01303	NPY_HUMAN	Pro-neuropeptide Y [Cleaved into: Neuropeptide Y (Neuropeptide tyrosine) (NPY); C-flanking peptide of NPY (CPON)]	0	959460	0	0	537170	0	0	0	0	0	0	0	0	0	0	0	0	0	0	0	0	0	0	0	1.00738e+06	0	0	0	0	0	0	0	0	0	0	812773	809048	1.42352e+06	928159	246564	0	822075	506339	1.20611e+06	602162	1.19034e+06
	Q9H3G5	CPVL_HUMAN	Probable serine carboxypeptidase CPVL (EC 3.4.16.-) (Carboxypeptidase, vitellogenic-like) (Vitellogenic carboxypeptidase-like protein) (VCP-like protein) (hVLP)	0	0	0	0	545079	0	0	0	0	0	0	0	0	244716	0	0	0	0	0	0	0	0	0	0	0	0	0	0	0	0	0	0	0	0	0	0	232418	1.6933e+06	0	0	0	0	820243	1.34609e+06	419469	0
	Q15113	PCOC1_HUMAN	Procollagen C-endopeptidase enhancer 1 (Procollagen COOH-terminal proteinase enhancer 1) (PCPE-1) (Procollagen C-proteinase enhancer 1) (Type 1 procollagen C-proteinase enhancer protein) (Type I procollagen COOH-terminal proteinase enhancer)	1.1192e+06	2.56714e+06	0	406336	614082	0	0	0	0	1.80695e+06	741512	625285	453923	0	931953	300372	629166	0	1.22838e+06	0	821240	232917	3.01613e+06	0	1.61774e+06	760314	0	0	309344	1.33264e+06	4.07366e+06	0	6.05537e+06	9.93771e+06	860553	2.24436e+06	1.25665e+06	2.75408e+06	2.56043e+06	1.73703e+06	1.59406e+06	1.6833e+06	973478	2.40815e+06	1.27676e+06	1.85161e+06
	P01210	PENK_HUMAN	Proenkephalin-A [Cleaved into: Synenkephalin; Met-enkephalin (Opioid growth factor) (OGF); PENK(114-133); PENK(143-183); Met-enkephalin-Arg-Gly-Leu; Leu-enkephalin; PENK(237-258); Met-enkephalin-Arg-Phe]	477693	993282	0	0	1.98318e+06	306382	393571	0	0	0	341487	0	0	501748	0	0	342275	344412	1.20106e+06	171727	1.12283e+06	0	0	0	2.70318e+06	237115	0	0	525640	2.13007e+06	0	0	0	0	0	2.75904e+06	972290	1.7728e+06	1.6498e+06	1.37651e+06	1.0215e+06	2.5779e+06	2.14798e+06	2.88693e+06	2.31969e+06	3.02322e+06
	P01213	PDYN_HUMAN	Proenkephalin-B (Beta-neoendorphin-dynorphin) (Preprodynorphin) [Cleaved into: Alpha-neoendorphin; Beta-neoendorphin; Big dynorphin (Big Dyn); Dynorphin A(1-17) (Dyn-A17) (Dynorphin A); Dynorphin A(1-13); Dynorphin A(1-8); Leu-enkephalin; Rimorphin (Dynorphin B) (Dyn-B) (Dynorphin B(1-13)); Leumorphin (Dynorphin B-29)]	0	0	0	0	0	0	0	0	0	0	0	0	0	0	0	0	0	0	0	0	0	0	0	0	0	0	0	0	0	0	0	0	0	0	0	0	0	0	0	0	0	0	0	0	0	0
	P07737	PROF1_HUMAN	Profilin-1 (Epididymis tissue protein Li 184a) (Profilin I)	1.25319e+07	0	2.59218e+06	4.22918e+06	1.80898e+06	988950	4.67053e+06	185491	1.35441e+07	4.31659e+06	1.26398e+06	1.35881e+07	7.0192e+06	0	1.61741e+06	4.09676e+06	1.90206e+06	1.02026e+06	0	1.07925e+06	7.0878e+06	5.46328e+06	2.29966e+07	3.29024e+07	0	0	721659	0	259328	2.99481e+06	2.11488e+07	3.47777e+06	3.51816e+07	2.07114e+07	9.0222e+06	0	0	300337	626697	0	548454	274925	0	0	0	0
	P51888	PRELP_HUMAN	Prolargin (Proline-arginine-rich end leucine-rich repeat protein)	0	0	0	0	0	0	0	0	0	0	0	0	0	0	0	0	0	0	0	0	0	0	0	0	276540	0	0	0	0	0	0	0	0	0	0	0	125338	388588	0	0	0	133701	136322	232005	0	281873
	Q5FWE3	PRRT3_HUMAN	Proline-rich transmembrane protein 3	0	684771	0	0	0	0	0	0	0	0	0	0	0	0	0	0	0	0	0	0	0	0	0	0	891706	0	0	0	0	0	0	0	0	0	0	410954	382441	643729	0	0	0	323547	0	0	516703	679341
	Q07954	LRP1_HUMAN	Prolow-density lipoprotein receptor-related protein 1 (LRP-1) (Alpha-2-macroglobulin receptor) (A2MR) (Apolipoprotein E receptor) (APOER) (CD antigen CD91) [Cleaved into: Low-density lipoprotein receptor-related protein 1 85 kDa subunit (LRP-85); Low-density lipoprotein receptor-related protein 1 515 kDa subunit (LRP-515); Low-density lipoprotein receptor-related protein 1 intracellular domain (L…	0	509966	0	0	0	0	0	0	0	0	0	0	0	0	0	0	0	0	0	0	276796	0	620373	0	0	0	0	0	0	0	0	0	1.45893e+06	0	0	346595	181530	323929	0	251521	0	409182	0	956444	225129	935214
	Q8IVL6	P3H3_HUMAN	Prolyl 3-hydroxylase 3 (EC 1.14.11.7) (Leprecan-like protein 2) (Protein B)	3.40302e+06	0	2.87729e+06	0	0	0	3.44876e+06	0	0	0	0	0	0	0	0	0	0	0	3.39378e+06	3.00401e+06	0	0	4.10338e+06	0	1.72149e+07	4.64376e+06	4.48759e+06	0	0	0	6811490	7.16555e+06	5.57899e+06	0	6.31511e+06	2.96324e+06	0	5.94406e+06	6.59937e+06	0	0	4.5214e+06	0	5.43933e+06	3.72888e+06	4.24088e+06
	P27918	PROP_HUMAN	Properdin (Complement factor P)	3.00696e+06	0	0	0	0	386912	0	0	5.40573e+06	0	255286	2.8854e+06	1.11075e+06	0	1.84028e+06	1234288	2.90468e+06	971280	0	314516	1.85058e+06	2.16901e+06	6.20041e+06	2.03632e+06	0	0	0	0	0	0	0	3.04134e+06	3.87691e+06	1.87548e+07	8.65371e+06	0	0	0	0	0	0	0	0	0	0	0
	Q9UHG2	PCSK1_HUMAN	ProSAAS (Proprotein convertase subtilisin/kexin type 1 inhibitor) (Proprotein convertase 1 inhibitor) (pro-SAAS) [Cleaved into: KEP; Big SAAS (b-SAAS); Little SAAS (l-SAAS) (N-proSAAS); Big PEN-LEN (b-PEN-LEN) (SAAS CT(1-49)); PEN; Little LEN (l-LEN); Big LEN (b-LEN) (SAAS CT(25-40))]	3.6391e+06	3.94486e+06	981664	1.13797e+06	1.68059e+06	914897	855287	0	4.36819e+06	3.67347e+06	1.6406e+06	348419	790892	709644	481714	676018	1.57786e+06	809065	1.10611e+06	504665	1.7207e+06	376373	2.86219e+06	750111	7.69413e+06	1.21417e+06	247723	133034	1.22171e+06	2.09993e+06	2.63674e+06	1.83264e+06	4.55212e+06	8.46854e+06	0	3.35922e+06	3.59013e+06	5.65945e+06	4.44883e+06	3.6464e+06	1.97446e+06	3.17166e+06	2.80564e+06	6.35432e+06	5.26425e+06	5.911e+06
	P07602	SAP_HUMAN	Prosaposin (Proactivator polypeptide) [Cleaved into: Saposin-A (Protein A); Saposin-B-Val; Saposin-B (Cerebroside sulfate activator) (CSAct) (Dispersin) (Sphingolipid activator protein 1) (SAP-1) (Sulfatide/GM1 activator); Saposin-C (A1 activator) (Co-beta-glucosidase) (Glucosylceramidase activator) (Sphingolipid activator protein 2) (SAP-2); Saposin-D (Component C) (Protein C)]	1.03469e+07	8.04741e+06	5.10177e+06	0	2.70798e+06	1.46019e+06	7.17286e+06	566327	0	3.88337e+06	3.86864e+06	0	3.37473e+06	973994	3.22584e+06	2.11606e+06	5.27728e+06	2.57747e+06	1.96122e+06	1.65516e+06	3.45114e+06	1.52278e+06	8.00258e+06	4.49585e+06	1.22506e+07	1.64564e+06	1.00615e+06	612271	1.04478e+06	2.7082e+06	7.9448e+06	4.21826e+06	1.17148e+07	1.87994e+08	7.09086e+07	5.89151e+06	5.43956e+06	7.13854e+06	8.82728e+06	6.9457e+06	4.3116e+06	4.90032e+06	4.79741e+06	9.4174e+06	6.50205e+06	1.04158e+07
	P41222	PTGDS_HUMAN	Prostaglandin-H2 D-isomerase (EC 5.3.99.2) (Beta-trace protein) (Cerebrin-28) (Glutathione-independent PGD synthase) (Lipocalin-type prostaglandin-D synthase) (Prostaglandin-D2 synthase) (PGD2 synthase) (PGDS) (PGDS2)	1.31954e+08	1.86484e+08	2.28481e+07	2.35493e+07	5.85158e+07	2.49194e+07	2.79858e+07	3.85227e+06	1.23035e+08	7.89239e+07	1.59202e+08	3.91727e+07	2.90669e+07	9.46757e+06	5.33191e+07	1.93631e+07	4.22381e+07	3.39619e+07	1.01021e+08	1.565e+07	9.04569e+07	2.45567e+07	1.16134e+08	4.55871e+07	9.64526e+07	3.29474e+07	5517093	4.42353e+06	2.02197e+07	2.94809e+07	7.75721e+07	7.26405e+07	2.46385e+08	4.15477e+08	1.02878e+08	1.89661e+08	1.40987e+08	2.79469e+08	9.93209e+07	9.72669e+07	5.00248e+07	2.90339e+08	3.99838e+07	1.00961e+08	6.00572e+07	8.17124e+07
	Q06323	PSME1_HUMAN	Proteasome activator complex subunit 1 (11S regulator complex subunit alpha) (REG-alpha) (Activator of multicatalytic protease subunit 1) (Interferon gamma up-regulated I-5111 protein) (IGUP I-5111) (Proteasome activator 28 subunit alpha) (PA28a) (PA28alpha)	0	0	0	0	0	0	0	0	0	0	0	0	0	0	0	0	0	0	0	0	0	0	4.82943e+06	0	0	0	0	0	0	0	0	0	4.93187e+06	0	0	0	0	0	0	0	0	0	0	0	0	0
	Q9UL46	PSME2_HUMAN	Proteasome activator complex subunit 2 (11S regulator complex subunit beta) (REG-beta) (Activator of multicatalytic protease subunit 2) (Proteasome activator 28 subunit beta) (PA28b) (PA28beta)	1.11865e+06	0	0	0	0	0	0	0	0	0	0	0	0	0	0	0	0	0	0	0	0	0	3.28545e+06	0	0	0	0	0	0	0	2.39611e+06	0	1.09713e+06	0	0	0	0	0	0	0	0	0	0	0	0	0
	P25787	PSA2_HUMAN	Proteasome subunit alpha type-2 (EC 3.4.25.1) (Macropain subunit C3) (Multicatalytic endopeptidase complex subunit C3) (Proteasome component C3)	0	0	0	0	0	0	0	0	0	0	0	0	0	0	0	0	0	0	0	0	0	0	0	0	0	0	0	0	0	0	1.15844e+06	0	951079	0	0	0	0	0	0	0	0	0	0	0	0	0
	P25788	PSA3_HUMAN	Proteasome subunit alpha type-3 (EC 3.4.25.1) (Macropain subunit C8) (Multicatalytic endopeptidase complex subunit C8) (Proteasome component C8)	0	0	0	0	326118	0	0	0	0	0	0	0	0	0	0	0	0	0	0	0	0	0	0	0	0	0	0	0	0	0	1.69533e+06	0	1.65354e+06	0	0	0	0	0	0	0	0	0	0	0	0	0
	P28066	PSA5_HUMAN	Proteasome subunit alpha type-5 (EC 3.4.25.1) (Macropain zeta chain) (Multicatalytic endopeptidase complex zeta chain) (Proteasome zeta chain)	0	0	0	0	333094	0	0	0	0	0	0	0	0	0	0	0	0	0	0	0	0	0	2.02789e+06	762337	0	0	0	0	0	0	3.39139e+06	0	2.16945e+06	0	0	0	0	0	0	0	0	0	0	0	0	0
	P60900	PSA6_HUMAN	Proteasome subunit alpha type-6 (EC 3.4.25.1) (27 kDa prosomal protein) (PROS-27) (p27K) (Macropain iota chain) (Multicatalytic endopeptidase complex iota chain) (Proteasome iota chain)	0	0	636666	0	231496	0	0	0	0	0	0	0	0	0	0	0	0	0	0	0	0	0	2.37921e+06	923181	0	0	0	0	0	0	3.17155e+06	0	0	0	0	0	0	0	0	0	0	0	0	0	0	0
	O14818	PSA7_HUMAN	Proteasome subunit alpha type-7 (EC 3.4.25.1) (Proteasome subunit RC6-1) (Proteasome subunit XAPC7)	0	0	0	0	190403	0	0	0	0	0	0	0	0	0	0	0	0	0	0	0	0	0	0	0	0	0	0	0	0	0	4.43006e+06	0	2.00934e+06	0	0	0	0	0	0	0	0	0	0	0	0	0
	P28070	PSB4_HUMAN	Proteasome subunit beta type-4 (EC 3.4.25.1) (26 kDa prosomal protein) (HsBPROS26) (PROS-26) (Macropain beta chain) (Multicatalytic endopeptidase complex beta chain) (Proteasome beta chain) (Proteasome chain 3) (HsN3)	0	0	0	0	315567	0	0	0	0	0	0	0	0	0	0	0	0	0	0	0	0	0	0	716242	0	0	0	0	0	0	0	0	1.77029e+06	0	0	0	0	0	0	0	0	0	0	0	0	0
	P02760	AMBP_HUMAN	Protein AMBP [Cleaved into: Alpha-1-microglobulin (Protein HC) (Alpha-1 microglycoprotein) (Complex-forming glycoprotein heterogeneous in charge); Inter-alpha-trypsin inhibitor light chain (ITI-LC) (Bikunin) (EDC1) (HI-30) (Uronic-acid-rich protein); Trypstatin]	8.591e+06	3.1432e+06	7.89275e+06	5.52832e+06	1.18281e+06	4.09568e+06	5.41882e+06	1.40551e+06	3.88161e+07	1.14393e+07	6.88828e+06	9.78253e+06	7.59347e+06	624337	1.25262e+07	6.57193e+06	9.30566e+06	4.47784e+06	1.71219e+06	3.3581e+06	6.75524e+06	5.1455e+06	2.0453e+07	4.48517e+06	1.52385e+06	3.36171e+06	1.86612e+06	1.89008e+06	1.33291e+06	3.37889e+06	7.0576e+07	1.57098e+07	9.03059e+06	6.99429e+07	2.52599e+07	3.80043e+06	2.33684e+06	4.35279e+06	4.20333e+06	3.52891e+06	3.99345e+06	2.64684e+06	1.28769e+06	3.15748e+06	1.84825e+06	2.34601e+06
	O60888	CUTA_HUMAN	Protein CutA (Acetylcholinesterase-associated protein) (Brain acetylcholinesterase putative membrane anchor)	0	1.04408e+06	0	0	0	0	1193686	0	0	0	0	0	0	287428	0	0	0	0	965763	0	0	0	0	0	3.6316e+06	0	0	0	0	0	0	0	0	0	0	936728	1.00296e+06	901152	2.01386e+06	1.23258e+06	0	1.69026e+06	964627	2.64493e+06	1.74405e+06	1.94193e+06
	Q99497	PARK7_HUMAN	Protein deglycase DJ-1 (DJ-1) (EC 3.1.2.-) (EC 3.5.1.-) (Oncogene DJ1) (Parkinson disease protein 7)	0	0	0	0	479136	0	0	0	0	0	0	0	0	0	0	0	1.13747e+06	0	0	0	0	412179	0	0	0	0	0	0	0	0	2519141	0	3.50382e+06	0	0	0	124476	200573	0	0	0	239487	0	0	0	0
	P07237	PDIA1_HUMAN	Protein disulfide-isomerase (PDI) (EC 5.3.4.1) (Cellular thyroid hormone-binding protein) (Prolyl 4-hydroxylase subunit beta) (p55)	295442	0	745788	0	93813.1	51478.6	255937	0	0	0	0	261753	0	0	0	0	0	0	0	74358.2	354663	780963	484728	2.03646e+06	0	0	0	0	0	0	1.47506e+06	0	1.53084e+06	431193	112871	0	0	0	0	0	0	0	0	0	0	0
	P30101	PDIA3_HUMAN	Protein disulfide-isomerase A3 (EC 5.3.4.1) (58 kDa glucose-regulated protein) (58 kDa microsomal protein) (p58) (Disulfide isomerase ER-60) (Endoplasmic reticulum resident protein 57) (ER protein 57) (ERp57) (Endoplasmic reticulum resident protein 60) (ER protein 60) (ERp60)	0	0	1.34552e+06	0	0	0	0	0	0	0	0	0	0	0	0	0	0	0	0	0	919944	0	0	2.31894e+06	0	0	0	0	0	0	2.85214e+06	0	4.79462e+06	0	0	218807	259074	303005	352681	0	0	0	0	479690	0	0
	Q15084	PDIA6_HUMAN	Protein disulfide-isomerase A6 (EC 5.3.4.1) (Endoplasmic reticulum protein 5) (ER protein 5) (ERp5) (Protein disulfide isomerase P5) (Thioredoxin domain-containing protein 7)	0	0	571429	0	0	0	0	0	0	0	0	0	0	0	0	0	0	0	0	0	0	0	0	572646	0	0	0	0	0	0	832300	0	918756	0	0	0	0	0	0	0	0	0	0	0	0	0
	Q92520	FAM3C_HUMAN	Protein FAM3C (Interleukin-like EMT inducer)	3.58436e+06	3.19795e+06	0	0	1.32553e+06	463672	722897	0	922777	1.56557e+06	2.32635e+06	742789	410202	158346	309027	591724	563567	364225	753510	287031	1.78217e+06	251357	2.64675e+06	0	4.18888e+06	863679	0	0	442168	2.16261e+06	5.07277e+06	1.33495e+06	5.63505e+06	9.05694e+06	2.1077e+07	3.57817e+06	3.49952e+06	4.12294e+06	2.95562e+06	1.7393e+06	1.06556e+06	3.22599e+06	1.46273e+06	3.02381e+06	2.7407e+06	3.45344e+06
	Q99435	NELL2_HUMAN	Protein kinase C-binding protein NELL2 (NEL-like protein 2) (Nel-related protein 2)	2.07467e+06	2.26273e+06	0	0	1.06342e+06	145517	483923	0	3.22214e+06	1.47753e+06	1375953	0	493703	0	188253	717652	438207	392880	802982	327021	5.06297e+06	0	1.39031e+06	523515	2.84666e+06	537863	0	0	476103	2.2584e+06	0	721195	4.36495e+06	3.89991e+06	1.11552e+06	2.26569e+06	2.39212e+06	3.62435e+06	1.59873e+06	2.14372e+06	1.36831e+06	2.0092e+06	749057	1.81756e+06	1.31774e+06	2.13673e+06
	Q9BWQ8	LFG2_HUMAN	Protein lifeguard 2 (Fas apoptotic inhibitory molecule 2) (Neural membrane protein 35) (Transmembrane BAX inhibitor motif-containing protein 2)	0	0	0	0	0	0	0	0	0	0	92041.8	0	0	0	0	0	0	0	0	0	0	0	0	0	0	0	0	0	0	0	0	0	0	0	0	0	0	0	0	0	0	0	0	0	0	0
	P48745	NOV_HUMAN	Protein NOV homolog (NovH) (CCN family member 3) (Insulin-like growth factor-binding protein 9) (IBP-9) (IGF-binding protein 9) (IGFBP-9) (Nephroblastoma-overexpressed gene protein homolog)	1.86688e+06	546808	0	0	0	0	0	0	0	0	0	0	0	0	0	0	0	0	721501	0	0	0	0	0	0	0	0	0	0	366347	0	0	1.73399e+06	0	0	951053	1.31742e+06	1.95414e+06	0	0	0	1.14792e+06	0	0	0	753236
	Q8WZA1	PMGT1_HUMAN	Protein O-linked-mannose beta-1,2-N-acetylglucosaminyltransferase 1 (POMGnT1) (EC 2.4.1.-) (UDP-GlcNAc:alpha-D-mannoside beta-1,2-N-acetylglucosaminyltransferase I.2) (GnT I.2)	0	427729	0	0	0	0	0	0	0	0	0	0	0	0	0	0	0	0	0	0	0	0	0	0	736761	0	0	0	0	0	0	0	0	0	0	626990	238620	0	251577	0	0	376218	0	0	252276	335213
	P31949	S10AB_HUMAN	Protein S100-A11 (Calgizzarin) (Metastatic lymph node gene 70 protein) (MLN 70) (Protein S100-C) (S100 calcium-binding protein A11) [Cleaved into: Protein S100-A11, N-terminally processed]	4.45611e+06	0	2.3455e+06	0	2.62878e+06	0	2.34952e+06	0	0	0	0	2.91057e+06	1.18544e+06	0	0	639927	0	0	0	0	0	778537	3.04582e+06	9.29016e+06	0	0	69289.7	0	0	0	1.93831e+07	0	3.03254e+07	0	0	0	0	0	0	0	0	0	0	0	0	0
	P80511	S10AC_HUMAN	Protein S100-A12 (CGRP) (Calcium-binding protein in amniotic fluid 1) (CAAF1) (Calgranulin-C) (CAGC) (Extracellular newly identified RAGE-binding protein) (EN-RAGE) (Migration inhibitory factor-related protein 6) (MRP-6) (p6) (Neutrophil S100 protein) (S100 calcium-binding protein A12) [Cleaved into: Calcitermin]	7.36393e+06	0	8.53282e+06	1.00788e+07	919755	1.3906e+06	5.93413e+06	541752	2.41148e+06	5.6777e+06	2.36753e+06	8.39516e+06	7.35902e+06	952404	825653	3.0408e+06	1.7547e+06	406785	0	434586	1.10093e+07	6.29354e+06	3.7951e+06	1.95238e+07	0	605472	1.4246e+06	0	456349	1.64137e+06	1.92943e+07	2.38747e+06	1.02848e+07	6.62669e+06	0	0	0	0	0	0	0	0	0	0	0	0
	P26447	S10A4_HUMAN	Protein S100-A4 (Calvasculin) (Metastasin) (Placental calcium-binding protein) (Protein Mts1) (S100 calcium-binding protein A4)	0	0	0	0	0	0	0	0	0	0	0	0	0	0	0	489786	0	0	0	0	840164	0	0	0	0	0	0	0	0	0	3.16667e+06	0	2.86283e+06	0	0	0	0	0	0	0	0	0	0	0	0	0
	P06703	S10A6_HUMAN	Protein S100-A6 (Calcyclin) (Growth factor-inducible protein 2A9) (MLN 4) (Prolactin receptor-associated protein) (PRA) (S100 calcium-binding protein A6)	0	0	1.33645e+07	6.57367e+06	9.61944e+06	0	5833117	0	0	0	0	1.78169e+07	4.28266e+06	0	0	4.78722e+06	0	0	0	0	8.20586e+06	4.13518e+06	0	6.10364e+07	0	0	0	0	0	0	0	0	2.44099e+07	0	9.62214e+06	0	325603	0	0	0	0	0	0	0	0	0
	P05109	S10A8_HUMAN	Protein S100-A8 (Calgranulin-A) (Calprotectin L1L subunit) (Cystic fibrosis antigen) (CFAG) (Leukocyte L1 complex light chain) (Migration inhibitory factor-related protein 8) (MRP-8) (p8) (S100 calcium-binding protein A8) (Urinary stone protein band A) [Cleaved into: Protein S100-A8, N-terminally processed]	5.15481e+06	0	8.0877e+07	4.84877e+07	2.46579e+07	1.18944e+07	4.75995e+07	3.6119e+06	5.0151e+07	4.18653e+07	5.37037e+07	1.32988e+08	5.27459e+07	829025	7.23939e+06	4.35897e+07	1.68225e+07	4.56875e+06	0	7.51912e+06	3.39225e+06	4.75533e+06	4.57806e+06	1.41128e+08	0	1.51761e+07	1.62082e+07	2.99355e+06	2.82722e+06	9.97931e+06	2.08829e+08	0	1.66595e+07	0	2.55057e+06	0	0	0	0	0	5.59696e+06	0	0	0	0	0
	P06702	S10A9_HUMAN	Protein S100-A9 (Calgranulin-B) (Calprotectin L1H subunit) (Leukocyte L1 complex heavy chain) (Migration inhibitory factor-related protein 14) (MRP-14) (p14) (S100 calcium-binding protein A9)	2.81479e+06	0	3.10185e+07	1.94669e+07	1.37837e+07	5.00303e+06	2.21961e+07	1.95042e+06	1.90727e+07	2.01435e+07	1.61866e+07	9.38128e+07	2.0582e+07	1.06752e+06	2.32646e+06	1.55284e+07	8.31786e+06	1.3114e+06	0	3.30389e+06	2.28083e+06	1.35238e+06	1.53122e+06	9.08102e+07	0	3.66977e+06	4.22768e+06	620632	1.53208e+06	5.62861e+06	7.44442e+07	1.39729e+06	8.7666e+06	0	0	0	0	0	0	0	2.89402e+06	0	0	0	0	0
	P04271	S100B_HUMAN	Protein S100-B (S-100 protein beta chain) (S-100 protein subunit beta) (S100 calcium-binding protein B)	0	0	0	0	0	0	0	0	0	0	0	0	0	0	0	0	0	0	0	0	0	0	1.64594e+06	0	0	0	0	0	0	0	0	0	0	0	0	0	0	0	0	0	0	0	0	0	0	0
	P25815	S100P_HUMAN	Protein S100-P (Migration-inducing gene 9 protein) (MIG9) (Protein S100-E) (S100 calcium-binding protein P)	7.4467e+06	0	3.86818e+06	2.03286e+06	4.61332e+06	0	1.79134e+06	0	0	0	0	7.26867e+06	4.92209e+06	0	0	2.64017e+06	0	0	0	402908	4.4126e+06	3.65325e+06	0	1.38958e+07	0	0	304476	0	0	562556	2.95856e+07	0	2.09361e+07	4.81657e+06	0	0	0	0	0	0	0	0	0	0	0	0
	Q8N114	SHSA5_HUMAN	Protein shisa-5 (Putative NF-kappa-B-activating protein 120) (Scotin)	0	0	0	0	0	0	0	0	0	0	0	0	0	0	0	0	0	0	0	0	0	0	0	0	0	0	0	0	0	0	0	0	6.57739e+06	0	0	0	0	0	0	0	0	0	0	0	0	0
	Q6ZSJ9	SHSA6_HUMAN	Protein shisa-6 homolog	0	0	0	0	0	0	0	0	0	0	0	0	0	0	0	0	0	0	0	0	0	0	0	0	0	0	0	0	0	0	0	0	0	0	0	0	0	2.52039e+06	0	0	0	0	0	0	0	2.24876e+06
	Q9GZM5	YIPF3_HUMAN	Protein YIPF3 (Killer lineage protein 1) (Natural killer cell-specific antigen KLIP1) (YIP1 family member 3) [Cleaved into: Protein YIPF3, 36 kDa form III]	5.92338e+06	0	0	0	0	0	0	0	0	0	0	0	0	0	0	0	0	0	1.26435e+06	0	2095388	0	0	0	6.88339e+06	0	0	0	0	0	1.05454e+07	0	8.77495e+06	0	0	0	1.16081e+06	2.41486e+06	2.69901e+06	0	0	0	0	0	0	0
	Q9UK55	ZPI_HUMAN	Protein Z-dependent protease inhibitor (PZ-dependent protease inhibitor) (PZI) (Serpin A10)	690494	0	0	281839	0	0	0	0	4.23972e+06	0	0	318855	942621	0	590721	0	582954	762266	0	534571	0	0	0	0	0	0	0	0	172118	425173	0	2.33461e+06	0	8.97344e+06	2.38312e+06	0	0	0	0	0	0	0	0	0	0	0
	Q86YA3	ZGRF1_HUMAN	Protein ZGRF1 (GRF-type zinc finger domain-containing protein 1)	2.86097e+08	1.13509e+07	0	0	0	0	0	0	0	0	0	0	0	0	0	0	0	0	0	0	148782069	1.23086e+08	2.23364e+08	0	0	0	0	0	0	0	0	3.73443e+08	1.8231e+08	0	0	1.17238e+08	3.87621e+07	3.55894e+07	0	0	0	8.42374e+07	0	0	0	0
	Q9UM07	PADI4_HUMAN	Protein-arginine deiminase type-4 (EC 3.5.3.15) (HL-60 PAD) (Peptidylarginine deiminase IV) (Protein-arginine deiminase type IV)	0	0	0	307316	0	0	0	0	0	0	0	615994	540842	0	0	0	0	0	0	0	0	382897	0	5.05585e+06	0	0	0	0	0	0	0	0	0	0	0	0	0	0	0	0	0	0	0	0	0	0
	P22061	PIMT_HUMAN	Protein-L-isoaspartate(D-aspartate) O-methyltransferase (PIMT) (EC 2.1.1.77) (L-isoaspartyl protein carboxyl methyltransferase) (Protein L-isoaspartyl/D-aspartyl methyltransferase) (Protein-beta-aspartate methyltransferase)	0	0	0	0	0	0	0	0	0	0	0	0	0	0	0	0	0	0	0	0	0	0	0	1.21979e+06	0	0	0	0	0	0	0	0	0	0	0	0	0	0	0	0	0	0	0	0	0	0
	Q92954	PRG4_HUMAN	Proteoglycan 4 (Lubricin) (Megakaryocyte-stimulating factor) (Superficial zone proteoglycan) [Cleaved into: Proteoglycan 4 C-terminal part]	1.06361e+06	0	0	0	170342	0	0	0	6.53472e+06	0	0	0	0	0	1.28979e+06	317472	1.04405e+06	476219	0	0	0	0	0	0	0	346237	0	0	0	0	0	0	2.06547e+06	0	0	460094	597170	502588	0	0	0	297272	0	0	0	0
	P00734	THRB_HUMAN	Prothrombin (EC 3.4.21.5) (Coagulation factor II) [Cleaved into: Activation peptide fragment 1; Activation peptide fragment 2; Thrombin light chain; Thrombin heavy chain]	6.99933e+06	1.80523e+06	4.35424e+06	4.62298e+06	545703	2.48005e+06	2.6285e+06	654596	3.96261e+07	8.64996e+06	3.52647e+06	9.14053e+06	7.94616e+06	289674	1.40051e+07	6.13759e+06	1.2276e+07	5.03383e+06	1.38416e+06	2.21241e+06	4.50803e+06	4.21865e+06	1.32682e+07	4.29755e+06	1.31405e+06	1.40268e+06	788451	812028	839284	1.73733e+06	9.32197e+06	1.06111e+07	9.89937e+06	8.12763e+07	1.9581e+07	2.84167e+06	2.34677e+06	2.78619e+06	3.92674e+06	4.05132e+06	2.9482e+06	2.92015e+06	1.62e+06	3.10687e+06	2.05011e+06	3.16868e+06
	Q9NYQ8	FAT2_HUMAN	Protocadherin Fat 2 (hFat2) (Cadherin family member 8) (Multiple epidermal growth factor-like domains protein 1) (Multiple EGF-like domains protein 1)	0	411808	0	0	0	0	0	0	0	0	0	0	0	0	0	0	0	0	0	0	0	0	0	0	471493	0	0	0	0	0	0	0	0	0	0	250765	168204	356837	452558	0	0	353326	244674	431653	457733	428395
	Q08174	PCDH1_HUMAN	Protocadherin-1 (Cadherin-like protein 1) (Protocadherin-42) (PC42)	0	555658	0	0	0	0	0	0	0	0	0	0	0	0	0	0	0	0	0	0	0	0	0	0	712100	0	0	0	0	0	0	0	0	0	0	345434	253315	490623	0	0	0	224521	0	0	0	0
	O60245	PCDH7_HUMAN	Protocadherin-7 (Brain-heart protocadherin) (BH-Pcdh)	0	0	0	0	0	0	0	0	0	0	0	0	0	0	0	0	0	0	0	0	0	0	0	0	0	0	0	0	0	0	0	0	0	0	0	0	0	0	0	0	0	0	0	0	0	0
	Q9HC56	PCDH9_HUMAN	Protocadherin-9	0	0	0	0	0	0	0	0	0	0	0	0	0	0	0	0	0	0	0	0	0	0	0	0	292511	0	0	0	0	0	0	0	0	0	0	0	0	0	0	0	0	0	0	0	0	0
	P00491	PNPH_HUMAN	Purine nucleoside phosphorylase (PNP) (EC 2.4.2.1) (Inosine phosphorylase) (Inosine-guanosine phosphorylase)	728804	0	1.26984e+06	435909	362498	0	690690	0	0	595658	432202	350399	628069	0	0	363847	0	0	0	0	694183	315176	882228	3.10877e+06	0	0	0	0	0	0	1.03879e+06	0	2.91509e+06	0	0	0	0	0	0	0	0	0	0	0	0	0
	P14618	KPYM_HUMAN	Pyruvate kinase PKM (EC 2.7.1.40) (Cytosolic thyroid hormone-binding protein) (CTHBP) (Opa-interacting protein 3) (OIP-3) (Pyruvate kinase 2/3) (Pyruvate kinase muscle isozyme) (Thyroid hormone-binding protein 1) (THBP1) (Tumor M2-PK) (p58)	3.55901e+06	1.0381e+06	3.04248e+06	2.28062e+06	703796	644958	2.44605e+06	571237	0	2.20335e+06	1.3311e+06	2.29006e+06	2.62327e+06	830405	1.00985e+06	1.69963e+06	1.48348e+06	804872	1.65159e+06	642182	2.45195e+06	2.19776e+06	5.67599e+06	9.58869e+06	2.62792e+06	0	779451	808389	764659	1.61666e+06	1.17218e+07	3.11089e+06	8.5686e+06	7.01803e+06	6.38073e+06	760650	852819	1.1083e+06	2.05194e+06	1.44906e+06	1.42581e+06	888692	1.10154e+06	1.59081e+06	1.53403e+06	1.38627e+06
	P31150	GDIA_HUMAN	Rab GDP dissociation inhibitor alpha (Rab GDI alpha) (Guanosine diphosphate dissociation inhibitor 1) (GDI-1) (Oligophrenin-2) (Protein XAP-4)	6.52858e+06	0	1.43602e+06	0	0	0	876952	0	0	0	0	0	0	0	0	0	0	0	0	0	0	0	2.55338e+06	1113353	0	0	0	0	0	0	0	0	0	0	0	0	0	0	0	0	0	232459	0	0	0	0
	P50395	GDIB_HUMAN	Rab GDP dissociation inhibitor beta (Rab GDI beta) (Guanosine diphosphate dissociation inhibitor 2) (GDI-2)	1.01321e+06	0	492960	0	292389	0	0	0	0	0	0	0	1.00739e+07	0	0	544262	0	0	0	0	1.06748e+07	350088	0	2.92868e+06	0	0	0	0	0	0	1.83752e+06	0	7.62808e+06	0	0	0	0	0	0	0	0	0	0	0	0	0
	P46940	IQGA1_HUMAN	Ras GTPase-activating-like protein IQGAP1 (p195)	0	0	0	0	285539	0	0	0	0	0	0	0	0	0	0	0	0	0	0	0	391413	0	0	1.09613e+06	0	0	0	0	0	0	3.9744e+06	0	854380	0	0	0	0	0	0	0	0	0	0	0	0	0
	P15153	RAC2_HUMAN	Ras-related C3 botulinum toxin substrate 2 (GX) (Small G protein) (p21-Rac2)	0	0	0	0	0	0	0	0	0	0	0	6.01082e+06	2.54739e+06	0	0	1.27731e+06	0	0	0	0	1.57819e+06	1.01171e+06	0	10481897	0	0	0	0	0	0	8.27868e+06	0	1.21691e+06	0	0	0	0	0	0	0	0	0	0	0	0	0
	P51149	RAB7A_HUMAN	Ras-related protein Rab-7a	0	0	0	0	0	0	0	0	0	0	0	0	0	0	0	0	0	0	0	0	891920	0	0	1.61584e+06	0	0	0	0	0	0	0	0	0	0	0	0	0	0	0	0	0	0	0	0	0	0
	P23468	PTPRD_HUMAN	Receptor-type tyrosine-protein phosphatase delta (Protein-tyrosine phosphatase delta) (R-PTP-delta) (EC 3.1.3.48)	0	765906	0	0	0	0	0	0	0	0	0	0	0	0	0	0	0	0	213180	0	0	0	0	0	908496	0	0	0	0	256395	0	0	0	0	0	262612	204474	370442	485127	0	0	221872	294775	840480	427369	617240
	P10586	PTPRF_HUMAN	Receptor-type tyrosine-protein phosphatase F (EC 3.1.3.48) (Leukocyte common antigen related) (LAR)	0	0	0	0	0	0	0	0	0	0	0	0	0	0	0	0	0	0	0	0	0	0	0	0	0	0	0	0	0	0	0	0	0	0	0	0	0	0	0	0	0	0	0	0	0	0
	P23470	PTPRG_HUMAN	Receptor-type tyrosine-protein phosphatase gamma (Protein-tyrosine phosphatase gamma) (R-PTP-gamma) (EC 3.1.3.48)	0	557363	0	0	202514	0	0	0	0	0	0	0	0	0	0	0	0	0	0	0	0	0	748276	0	1.28406e+06	0	0	0	0	0	0	0	0	0	0	440463	476833	631614	870704	0	0	614760	0	647981	0	735211
	Q92932	PTPR2_HUMAN	Receptor-type tyrosine-protein phosphatase N2 (R-PTP-N2) (EC 3.1.3.48) (Islet cell autoantigen-related protein) (IAR) (ICAAR) (Phogrin)	0	0	0	0	0	0	0	0	0	0	0	0	0	0	0	0	0	0	0	0	571521	0	0	0	1.11468e+06	0	0	0	0	0	0	0	0	0	0	377964	488200	598053	0	0	0	402611	0	541615	647266	948635
	Q13332	PTPRS_HUMAN	Receptor-type tyrosine-protein phosphatase S (R-PTP-S) (EC 3.1.3.48) (Receptor-type tyrosine-protein phosphatase sigma) (R-PTP-sigma)	0	744788	0	0	262783	0	0	0	0	0	0	0	0	0	0	0	0	0	239927	0	0	0	0	0	1.04896e+06	0	0	0	0	0	0	0	0	0	0	434194	404156	668084	903461	512834	0	504482	270965	656444	419821	585737
	P23471	PTPRZ_HUMAN	Receptor-type tyrosine-protein phosphatase zeta (R-PTP-zeta) (EC 3.1.3.48) (Protein-tyrosine phosphatase receptor type Z polypeptide 1) (Protein-tyrosine phosphatase receptor type Z polypeptide 2) (R-PTP-zeta-2)	0	2.14474e+06	0	0	554195	0	0	0	0	0	0	0	0	194586	0	0	0	0	585850	394775	447836	0	0	0	2.29247e+06	0	0	0	0	0	0	0	1.29478e+06	0	0	1.06952e+06	995029	1.51e+06	1.84749e+06	1.33727e+06	0	1.27211e+06	928195	2.15389e+06	1.26775e+06	1.7598e+06
	Q16849	PTPRN_HUMAN	Receptor-type tyrosine-protein phosphatase-like N (R-PTP-N) (Islet cell antigen 512) (ICA 512) (Islet cell autoantigen 3) (PTP IA-2)	0	1.75731e+06	0	0	1.03843e+06	0	0	0	0	0	0	0	0	0	0	0	0	0	0	0	0	0	0	0	2.92295e+06	0	0	0	0	0	0	0	2.35341e+06	0	0	1.63397e+06	1.66729e+06	1.83197e+06	1.88429e+06	0	667932	1.38957e+06	912429	2.22902e+06	1.47665e+06	1.9131e+06
	P78509	RELN_HUMAN	Reelin (EC 3.4.21.-)	340545	593106	0	0	45715	0	0	0	0	0	0	0	0	0	0	0	0	0	115807	0	0	0	0	0	1.46819e+06	0	0	0	0	0	0	0	460498	0	0	821755	674291	1.52859e+06	1.7198e+06	778025	0	966875	715735	1.3352e+06	1.65353e+06	1.64904e+06
	O75787	RENR_HUMAN	Renin receptor (ATPase H(+)-transporting lysosomal accessory protein 2) (ATPase H(+)-transporting lysosomal-interacting protein 2) (ER-localized type I transmembrane adaptor) (Embryonic liver differentiation factor 10) (N14F) (Renin/prorenin receptor) (Vacuolar ATP synthase membrane sector-associated protein M8-9) (ATP6M8-9) (V-ATPase M8.9 subunit)	863080	0	0	0	0	0	0	0	0	0	0	0	0	0	0	0	0	0	0	0	0	0	688170	0	802078	0	0	0	0	0	0	0	0	0	0	962741	254314	1.06924e+06	0	0	0	405275	274756	0	0	918620
	Q96B86	RGMA_HUMAN	Repulsive guidance molecule A (RGM domain family member A)	0	0	0	0	0	0	0	0	0	0	0	0	0	0	0	0	0	0	0	0	0	0	0	0	0	0	0	0	0	0	0	0	0	0	0	151012	234470	407923	0	0	0	0	0	0	0	0
	Q9HD89	RETN_HUMAN	Resistin (Adipose tissue-specific secretory factor) (ADSF) (C/EBP-epsilon-regulated myeloid-specific secreted cysteine-rich protein) (Cysteine-rich secreted protein A12-alpha-like 2) (Cysteine-rich secreted protein FIZZ3)	5.08585e+06	0	0	0	986965	0	2.36468e+06	0	0	2.72649e+06	5.6439e+06	4.10736e+06	5.13818e+06	0	0	2.74603e+06	4.98871e+06	0	0	3.18927e+06	3.65112e+06	6.14055e+06	0	7.25921e+06	0	1.19986e+06	428299	644525	442483	5.18795e+06	1.84597e+07	5.59865e+06	1.17012e+07	0	3.12344e+06	0	0	0	0	0	0	0	0	0	0	0
	Q9BZR6	RTN4R_HUMAN	Reticulon-4 receptor (Nogo receptor) (NgR) (Nogo-66 receptor)	0	0	0	0	0	0	0	0	0	0	0	0	0	0	0	0	0	0	0	0	0	0	0	0	0	0	0	0	0	0	0	0	0	0	0	324026	245405	412813	0	0	0	283502	0	0	0	583577
	Q86UN3	R4RL2_HUMAN	Reticulon-4 receptor-like 2 (Nogo receptor-like 3) (Nogo-66 receptor homolog 1) (Nogo-66 receptor-related protein 2) (NgR2)	0	369416	0	0	71365.4	0	0	0	0	0	0	0	0	0	0	0	0	0	0	0	0	0	0	0	1.21131e+06	0	0	0	0	0	0	0	0	0	0	471265	494540	764022	627518	0	0	346281	0	474148	503895	670704
	Q99969	RARR2_HUMAN	Retinoic acid receptor responder protein 2 (Chemerin) (RAR-responsive protein TIG2) (Tazarotene-induced gene 2 protein)	0	1.58918e+06	0	0	280089	0	0	0	0	0	0	0	0	0	0	0	0	0	401165	172454	0	0	0	0	1.81147e+06	152086	0	0	0	0	0	0	707736	0	0	708862	813091	1.38792e+06	1.04995e+06	812085	556191	643671	541556	1.57051e+06	690921	1.08478e+06
	P02753	RET4_HUMAN	Retinol-binding protein 4 (Plasma retinol-binding protein) (PRBP) (RBP) [Cleaved into: Plasma retinol-binding protein(1-182); Plasma retinol-binding protein(1-181); Plasma retinol-binding protein(1-179); Plasma retinol-binding protein(1-176)]	6.46782e+06	4.45121e+06	9.25987e+06	3.93102e+06	1.86633e+06	2.19808e+06	3.11567e+06	454721	1.21219e+07	6.43031e+06	2.56419e+06	6.56851e+06	4.18522e+06	714173	1.94995e+07	8.1413e+06	5.23145e+06	2.46221e+06	1.93671e+06	1.58617e+06	4.12619e+06	2.01075e+06	1.24606e+07	2.7027e+06	1.97591e+06	1.05895e+06	504339	462966	574692	2.10413e+06	3.12459e+07	4.47489e+06	3.94159e+06	3.44247e+07	1.60801e+07	4.03508e+06	2.08428e+06	3.59739e+06	5.4512e+06	4.48393e+06	2.64043e+06	2.64276e+06	1.99926e+06	4.84705e+06	2.3572e+06	4.47285e+06
	Q6NW40	RGMB_HUMAN	RGM domain family member B (DRG11-responsive axonal guidance and outgrowth of neurite) (DRAGON)	0	0	0	0	0	0	0	0	0	0	0	0	0	0	0	0	0	0	0	0	0	0	0	0	984536	0	0	0	0	0	0	0	0	0	0	0	410121	630998	0	0	0	324203	0	0	0	0
	P52565	GDIR1_HUMAN	Rho GDP-dissociation inhibitor 1 (Rho GDI 1) (Rho-GDI alpha)	0	0	0	0	220954	0	0	0	0	0	0	0	1.27899e+06	0	238805	695342	0	0	0	256313	935029	431009	3.65775e+06	2.84354e+06	0	0	0	0	0	461480	4.58223e+06	0	5.56297e+06	0	0	0	0	0	0	0	0	0	0	0	0	0
	P52566	GDIR2_HUMAN	Rho GDP-dissociation inhibitor 2 (Rho GDI 2) (Ly-GDI) (Rho-GDI beta)	1.03305e+07	0	1.92506e+06	3.39773e+06	3.28837e+06	0	6.29977e+06	0	0	0	0	9.11471e+06	4.91403e+06	0	1.07906e+06	2.72781e+06	1.48843e+06	629472	0	560882	3.86413e+06	3.15491e+06	4.31045e+06	1.78318e+07	0	0	0	0	0	2.49345e+06	3.48423e+07	984568	1.24301e+07	0	7.13979e+06	0	0	0	0	0	0	0	0	0	0	0
	P84095	RHOG_HUMAN	Rho-related GTP-binding protein RhoG	0	0	0	0	0	0	0	0	0	0	0	0	0	0	0	0	0	0	0	0	0	0	0	831332	0	0	0	0	0	0	0	0	0	0	0	0	0	0	0	0	0	0	0	0	0	0
	P34096	RNAS4_HUMAN	Ribonuclease 4 (RNase 4) (EC 3.1.27.-)	941510	1.14697e+06	0	0	396453	222707	0	0	0	1.62547e+06	0	0	0	0	0	0	0	720769	418176	0	634164	0	0	0	458192	0	0	0	0	560669	2.67885e+06	0	2.01552e+06	1.3048e+06	0	854248	558024	809423	0	566561	389497	568849	381824	925888	708252	570627
	P13489	RINI_HUMAN	Ribonuclease inhibitor (Placental ribonuclease inhibitor) (Placental RNase inhibitor) (Ribonuclease/angiogenin inhibitor 1) (RAI)	851624	0	579459	0	575264	0	436980	0	0	439301	0	0	670674	0	0	362890	0	0	0	0	725431	484839	2.73517e+06	1.84358e+06	0	0	0	0	0	576574	2.33731e+06	0	2.4105e+06	0	788396	0	0	0	0	0	0	0	0	0	0	0
	Q93091	RNAS6_HUMAN	Ribonuclease K6 (RNase K6) (EC 3.1.27.-)	0	1.19379e+06	0	0	762078	0	0	0	0	0	0	0	0	0	0	0	0	0	679013	0	0	0	0	0	0	0	0	0	0	0	0	0	0	0	0	0	0	0	0	0	0	0	0	0	0	0
	P07998	RNAS1_HUMAN	Ribonuclease pancreatic (EC 3.1.27.5) (HP-RNase) (RIB-1) (RNase UpI-1) (Ribonuclease 1) (RNase 1) (Ribonuclease A) (RNase A)	5.17965e+06	6.38313e+06	828836	0	9.30381e+06	749449	1.37817e+06	0	2.70473e+06	1.98363e+06	1.20718e+06	1.71462e+06	881837	780126	1.8362e+06	735634	1.36248e+06	1.48078e+06	2.8563e+06	661884	3.22544e+06	735650	3.25475e+06	936712	5.56662e+06	620613	0	0	1.06841e+06	831309	9.77423e+06	2.19507e+06	3.94226e+07	5.01074e+06	3.63237e+06	1.39339e+07	1.37159e+07	1.81088e+07	3.75871e+06	2.17892e+06	2.68358e+06	1.29463e+07	1.35111e+06	3.4651e+06	1.73754e+06	2.24567e+06
	O00584	RNT2_HUMAN	Ribonuclease T2 (EC 3.1.27.-) (Ribonuclease 6)	1.86965e+06	1.34389e+06	531568	0	503833	0	404268	0	0	1.37239e+06	824527	0	417238	252408	318201	0	540632	492846	897015	297635	1.30058e+06	0	2.98867e+06	0	871001	0	0	0	307577	0	1.56453e+06	657483	3.55696e+06	3.68119e+06	1.62161e+06	791580	689797	1.06021e+06	785717	521286	293979	941207	209980	464018	556407	524291
	Q14692	BMS1_HUMAN	Ribosome biogenesis protein BMS1 homolog (Ribosome assembly protein BMS1 homolog)	5.82594e+07	0	9.21778e+06	0	0	0	0	0	0	1.71371e+07	0	0	0	0	0	0	0	0	0	1.12858e+06	0	0	1.55695e+08	1.90297e+06	0	893352	0	0	0	0	3.5583e+06	7.14561e+07	0	0	0	0	0	0	9.05858e+06	0	0	0	0	1.1049e+06	0	900773
	P63208	SKP1_HUMAN	S-phase kinase-associated protein 1 (Cyclin-A/CDK2-associated protein p19) (p19A) (Organ of Corti protein 2) (OCP-2) (Organ of Corti protein II) (OCP-II) (RNA polymerase II elongation factor-like protein) (SIII) (Transcription elongation factor B polypeptide 1-like) (p19skp1)	0	0	0	0	0	0	0	0	0	0	0	0	0	0	0	0	0	0	0	0	0	0	0	0	0	0	0	0	0	0	0	0	0	0	0	0	0	0	0	0	0	0	0	0	0	0
	Q86VB7	C163A_HUMAN	Scavenger receptor cysteine-rich type 1 protein M130 (Hemoglobin scavenger receptor) (CD antigen CD163) [Cleaved into: Soluble CD163 (sCD163)]	3.69634e+06	933205	1.67369e+06	0	2.55991e+06	795050	0	0	1.76016e+06	1.66175e+06	459985	1.16032e+06	510071	0	1.45818e+06	1.67992e+06	610016	418378	779677	258576	1.37483e+06	454082	8.32392e+06	0	300843	792002	0	0	524556	1.15691e+06	1.36905e+07	4.70953e+06	1.48524e+07	2.54985e+06	4.73455e+06	449024	356408	807239	615105	521344	0	780279	104598	362166	542748	376954
	O75711	SCRG1_HUMAN	Scrapie-responsive protein 1 (Scrapie-responsive gene 1 protein) (ScRG-1)	964421	1.01964e+06	0	0	0	0	0	0	0	0	806632	0	0	0	429784	0	0	0	439097	0	830264	0	805478	0	0	0	0	0	0	0	0	0	0	0	0	0	0	0	907580	0	0	1.18246e+06	0	975804	0	0
	P05060	SCG1_HUMAN	Secretogranin-1 (Chromogranin-B) (CgB) (Secretogranin I) (SgI) [Cleaved into: PE-11; GAWK peptide; CCB peptide]	3.86253e+06	6.69586e+06	837224	692224	2.44372e+06	1.15317e+06	1.63574e+06	270455	2.85167e+06	4.80408e+06	1.39046e+06	2.19166e+06	984580	485465	608367	603501	1.17867e+06	912061	1.76054e+06	516135	1.94907e+06	774170	1.32221e+06	1.69196e+06	8.3922e+06	998033	290993	133527	1162775	1.03932e+06	4.66187e+06	1.73181e+06	6.15083e+06	8.35587e+06	5.43393e+06	7.88573e+06	6.01165e+06	1.16757e+07	8.37528e+06	4.57589e+06	3.30672e+06	8.43399e+06	4.09684e+06	8.29125e+06	7.26572e+06	8.26068e+06
	P13521	SCG2_HUMAN	Secretogranin-2 (Chromogranin-C) (Secretogranin II) (SgII) [Cleaved into: Secretoneurin (SN); Manserin]	2.1693e+06	2.1886e+06	0	0	1133778	517926	692654	0	0	2.25842e+06	973509	0	451270	219410	0	0	796980	399093	518108	282413	1.53587e+06	0	741384	0	3.7677e+06	686478	0	0	531017	977886	0	0	3.52164e+06	1.08773e+07	0	1.69395e+06	2.24478e+06	2.88119e+06	2.95648e+06	1.96628e+06	2.18808e+06	1.46127e+06	1.38191e+06	2.93751e+06	1.56385e+06	2.13717e+06
	Q8WXD2	SCG3_HUMAN	Secretogranin-3 (Secretogranin III) (SgIII)	2.1396e+06	3.59693e+06	355595	995792	1.09223e+06	463737	779612	0	1.8841e+06	2.11883e+06	963760	0	466958	0	475751	390094	562108	411066	765003	272848	932455	531272	1.35698e+06	856066	5.46852e+06	621039	218591	0	527704	1.32384e+06	2.58923e+06	856099	3.86596e+06	5.03697e+06	1.67897e+06	2.18457e+06	1.89122e+06	2.68098e+06	2.89404e+06	1.75026e+06	1.2054e+06	2.03434e+06	1.38635e+06	3.0923e+06	2.50926e+06	3.41999e+06
	Q9BYH1	SE6L1_HUMAN	Seizure 6-like protein	1.01948e+06	2.02194e+06	0	0	653850	0	0	0	0	0	411079	0	0	0	0	0	0	0	440166	0	0	0	0	0	2.22892e+06	0	0	0	0	1.32704e+06	0	0	2980913	0	0	1.52512e+06	1.7244e+06	1.68775e+06	1.7331e+06	1.39421e+06	689271	1.08734e+06	821832	2.23972e+06	1.31573e+06	2.32768e+06
	Q6UXD5	SE6L2_HUMAN	Seizure 6-like protein 2	685551	1.9462e+06	0	0	561130	0	0	0	0	0	682190	0	0	0	0	0	0	0	286105	0	475468	0	687221	0	2.14385e+06	240301	0	0	0	385794	790708	0	1.3212e+06	0	0	863155	774362	1.14082e+06	1.13855e+06	772323	717511	1.02241e+06	541478	1.54091e+06	1.22379e+06	1.34258e+06
	Q53EL9	SEZ6_HUMAN	Seizure protein 6 homolog (SEZ-6) (hSEZ-6)	478077	1.37892e+06	0	0	317660	0	0	0	0	0	0	0	0	0	0	0	0	0	202301	0	0	0	0	0	1.45688e+06	0	0	0	0	873026	0	0	0	0	0	896412	645421	958277	1.10247e+06	1.21067e+06	850342	1.07433e+06	719902	1.07684e+06	887589	935687
	Q13228	SBP1_HUMAN	Selenium-binding protein 1 (56 kDa selenium-binding protein) (SBP56) (SP56)	332876	315234	911087	0	129013	0	548774	0	0	0	0	0	0	187476	0	374005	687420	0	0	356532	0	0	1.80232e+06	0	945329	0	0	0	0	0	0	0	0	0	0	162172	274286	258581	0	0	0	345644	256546	589209	384074	364047
	P49908	SEPP1_HUMAN	Selenoprotein P (SeP)	624386	486353	0	0	186942	0	281615	0	0	0	776971	2.80879e+06	0	0	2.33136e+06	1.08685e+06	1.45026e+06	427726	0	0	0	481131	1.31758e+06	710434	388741	0	0	0	0	0	0	607567	0	8.47235e+06	1.52395e+06	270663	269545	448918	0	660088	0	0	345302	0	465720	625362
	Q9NS98	SEM3G_HUMAN	Semaphorin-3G (Semaphorin sem2)	0	355997	0	0	0	0	0	0	0	0	0	0	0	0	0	0	0	0	0	0	0	0	0	0	234211	0	0	0	0	0	0	0	0	0	0	152724	0	0	0	0	0	0	0	0	0	0
	Q9NPR2	SEM4B_HUMAN	Semaphorin-4B	0	0	0	0	0	0	0	0	0	0	0	0	0	0	0	0	0	0	0	0	0	0	0	0	0	0	0	0	0	0	0	0	0	0	0	0	0	0	0	0	0	0	0	0	0	0
	O75326	SEM7A_HUMAN	Semaphorin-7A (CDw108) (JMH blood group antigen) (John-Milton-Hargen human blood group Ag) (Semaphorin-K1) (Sema K1) (Semaphorin-L) (Sema L) (CD antigen CD108)	397069	997560	0	0	189611	0	0	0	0	0	0	0	0	0	0	0	0	0	283325	0	648083	0	570010	0	1.31794e+06	0	0	0	0	0	0	334347	465767	1.37666e+06	0	1.37131e+06	1336150	2.22792e+06	2.14217e+06	955608	777241	1.16701e+06	547183	879725	1.27657e+06	1.48835e+06
	P10124	SRGN_HUMAN	Serglycin (Hematopoietic proteoglycan core protein) (Platelet proteoglycan core protein) (P.PG) (Secretory granule proteoglycan core protein)	3.28253e+06	213824	0	0	0	1.15429e+06	0	1.10015e+06	2.51684e+07	3.12047e+06	0	1.93001e+06	3.84085e+06	0	2.16172e+06	1.38829e+06	7453160	3.2391e+06	0	3.53496e+06	2.86575e+06	2738465	6.36921e+06	1.65247e+06	0	0	0	0	0	1.80297e+06	2.64361e+06	5.82102e+06	5.04616e+06	2.4729e+07	6.72769e+06	0	0	0	0	0	0	0	0	0	0	0
	Q92743	HTRA1_HUMAN	Serine protease HTRA1 (EC 3.4.21.-) (High-temperature requirement A serine peptidase 1) (L56) (Serine protease 11)	1.50503e+06	1341355	0	0	378022	0	0	0	0	0	0	0	0	0	0	0	0	0	335119	112389	307352	0	0	0	683274	0	0	0	0	0	0	0	2.42285e+06	0	0	1.19876e+06	973253	1.29929e+06	914939	336984	194645	1.17587e+06	0	900146	404149	612097
	Q9BRF8	CPPED_HUMAN	Serine/threonine-protein phosphatase CPPED1 (EC 3.1.3.16) (Calcineurin-like phosphoesterase domain-containing protein 1) (Complete S-transactivated protein 1)	0	0	0	0	300147	0	0	0	0	0	0	0	0	0	0	0	0	0	0	0	0	0	0	0	0	0	0	0	0	0	0	0	0	0	0	0	0	0	0	0	0	0	0	0	0	0
	P02787	TRFE_HUMAN	Serotransferrin (Transferrin) (Beta-1 metal-binding globulin) (Siderophilin)	7.91188e+07	5.12552e+07	6.06506e+07	3.81643e+07	2.15438e+07	2.3698e+07	4.53029e+07	7.05537e+06	3.7708e+08	8.50441e+07	4.48051e+07	1.30908e+08	7.93618e+07	7.34137e+06	1.1582e+08	7.57661e+07	1.18981e+08	5.46478e+07	3.31747e+07	3.05299e+07	6.96189e+07	8.90275e+07	1.79764e+08	6.48153e+07	3.19678e+07	1.85102e+07	1.40174e+07	9.40771e+06	1.37078e+07	3.44079e+07	1.02043e+08	1.52305e+08	1.11804e+08	7.72601e+08	4.36405e+08	5.90711e+07	3.32099e+07	6.58247e+07	5.10938e+07	4.06296e+07	3.00051e+07	6.07527e+07	2.55824e+07	5.28268e+07	2.73423e+07	4.67563e+07
	P48595	SPB10_HUMAN	Serpin B10 (Bomapin) (Peptidase inhibitor 10) (PI-10)	0	0	0	0	695163	0	0	0	0	0	0	1.22004e+06	880513	0	0	467442	0	0	0	0	0	0	0	0	0	0	0	0	0	0	1.95746e+06	0	0	0	0	0	0	0	0	0	0	0	0	0	0	0
	P02768	ALBU_HUMAN	Serum albumin	1.00031e+09	2.97818e+08	5.36093e+08	5.33579e+08	1.33557e+08	2.93121e+08	4.99389e+08	8.87877e+07	2.58417e+09	1.02385e+09	5.03833e+08	9.62522e+08	1.03943e+09	6.23902e+07	8.52973e+08	7.07617e+08	9.9701e+08	5.57338e+08	2.80817e+08	2.84746e+08	7.42674e+08	9.97514e+08	2.98364e+09	5.91208e+08	1.61248e+08	1.68222e+08	1.72674e+08	1.06276e+08	1.1849e+08	5.67161e+08	1.17425e+09	1.86209e+09	1.59467e+09	7.97081e+09	6.02137e+09	6.61136e+08	3.44256e+08	6.48469e+08	6.43384e+08	4.221e+08	3.23898e+08	4.99645e+08	2.2605e+08	3.43849e+08	2.33989e+08	3.38235e+08
	P0DJI8	SAA1_HUMAN	Serum amyloid A-1 protein (SAA) [Cleaved into: Amyloid protein A (Amyloid fibril protein AA); Serum amyloid protein A(2-104); Serum amyloid protein A(3-104); Serum amyloid protein A(2-103); Serum amyloid protein A(2-102); Serum amyloid protein A(4-101)]	3.95176e+07	5.14545e+06	5.04472e+06	0	3.23119e+06	1.1023e+07	1.92505e+07	9.0326e+06	3.46451e+08	8.24554e+07	2.76779e+07	1.41108e+07	1.05717e+08	1.21851e+06	5.81131e+06	1.02605e+07	1.63197e+08	7.41993e+07	3.67881e+06	1.78828e+07	2.59354e+07	5.51921e+07	3.48531e+07	1.66432e+07	0	5.31246e+07	1.05411e+07	2.9929e+07	1.4481e+07	1.84064e+07	1.31294e+07	1.21233e+08	2.81221e+07	2.70649e+08	2.50553e+08	0	0	0	0	0	0	0	0	0	0	0
	P0DJI9	SAA2_HUMAN	Serum amyloid A-2 protein (SAA2)	6.11871e+06	1.86545e+06	0	0	0	4.18819e+06	5.88926e+06	2.87248e+06	4.77116e+07	8.47168e+06	1.02154e+07	0	1.64551e+07	0	0	2.22867e+06	6.65083e+07	2.20531e+07	2.25493e+06	3.8711e+06	4.70501e+06	7.95321e+06	1.48779e+07	3.72579e+06	0	3.10805e+06	1.19296e+06	7.32621e+06	2.77354e+06	0	3.60578e+06	2.41942e+07	1.03438e+07	8.66161e+07	3.87583e+07	0	0	0	0	0	0	0	0	0	0	926425
	P35542	SAA4_HUMAN	Serum amyloid A-4 protein (Constitutively expressed serum amyloid A protein) (C-SAA)	1.34204e+07	3.09701e+06	9.25149e+06	9.20597e+06	2.99525e+06	6.6016e+06	1.05888e+07	2.36261e+06	5.99065e+07	2.30236e+07	4.46309e+06	2.77683e+07	1.28187e+07	0	1.30185e+07	6.03396e+06	3.0011e+07	6.21801e+06	2.18837e+06	3.58258e+06	1.03566e+07	4.16624e+06	2.05837e+07	1.03593e+07	1.4303e+06	4.4163e+06	2.38416e+06	1.92021e+06	2.3256e+06	1.09351e+07	2.29874e+07	1.21235e+07	9.54246e+06	9.13701e+07	5.28327e+07	4.77156e+06	1.84356e+06	4.55749e+06	6.82993e+06	5.59898e+06	4.99295e+06	4.60392e+06	1.87516e+06	5.64416e+06	3.51235e+06	2.22605e+06
	P02743	SAMP_HUMAN	Serum amyloid P-component (SAP) (9.5S alpha-1-glycoprotein) [Cleaved into: Serum amyloid P-component(1-203)]	2.79874e+06	963121	4.26768e+06	4.201e+06	150315	1.61292e+06	3.05094e+06	509886	8.0847e+07	1.06773e+07	4.0733e+06	1.09964e+07	1.02734e+07	0	9.47397e+06	4.67743e+06	1.26533e+07	4.36254e+06	0	2.35612e+06	2.99614e+06	2.40221e+06	3.67824e+06	0	0	3.29723e+06	451070	634918	746191	1.15183e+06	1.77602e+06	0	0	2.18391e+07	0	0	0	0	932891	779172	1.24714e+06	0	334202	587134	266195	898462
	P27169	PON1_HUMAN	Serum paraoxonase/arylesterase 1 (PON 1) (EC 3.1.1.2) (EC 3.1.1.81) (EC 3.1.8.1) (Aromatic esterase 1) (A-esterase 1) (K-45) (Serum aryldialkylphosphatase 1)	3.3748e+06	713492	3.42496e+06	3.05435e+06	0	2.04391e+06	2.26162e+06	651443	2.06474e+07	5.27153e+06	3.51818e+06	1.31424e+07	7.66158e+06	0	8.9202e+06	5.6545e+06	8841087	2975367	217230	1.96697e+06	3.23191e+06	4.09066e+06	9.81859e+06	3.80164e+06	673669	1.48726e+06	1.9875e+06	841486	946402	1.48351e+06	0	8.89394e+06	2.48257e+06	4.22828e+07	2.17729e+07	752670	888394	1.62932e+06	3.22086e+06	2.80953e+06	4.21944e+06	790454	624772	2.22693e+06	1.18219e+06	1.97203e+06
	P04278	SHBG_HUMAN	Sex hormone-binding globulin (SHBG) (Sex steroid-binding protein) (SBP) (Testis-specific androgen-binding protein) (ABP) (Testosterone-estradiol-binding globulin) (TeBG) (Testosterone-estrogen-binding globulin)	1.11504e+06	0	0	2.32446e+06	0	0	447224	0	3.57124e+06	1.28376e+06	0	2.15982e+06	1.69795e+06	0	0	891905	0	0	0	0	0	0	583476	2.11732e+06	0	0	0	0	0	755150	0	0	0	0	0	212537	0	0	0	0	0	0	464926	641155	0	894488
	O75368	SH3L1_HUMAN	SH3 domain-binding glutamic acid-rich-like protein	1.42842e+06	247991	0	0	888020	0	776435	0	0	0	0	1.03617e+06	1.1515e+06	0	0	622869	0	0	0	290447	902787	0	2.24306e+06	2.15888e+06	0	0	0	0	0	499755	5.3241e+06	0	3.37331e+06	0	0	0	0	0	0	0	0	0	0	0	0	0
	Q9H299	SH3L3_HUMAN	SH3 domain-binding glutamic acid-rich-like protein 3 (SH3 domain-binding protein 1) (SH3BP-1)	8.70699e+06	0	0	0	1.60106e+06	0	0	0	0	0	0	0	2.93863e+06	0	793009	1.406e+06	927702	0	0	0	2.51026e+06	1702647	0	0	0	0	0	0	0	0	1.39966e+07	0	2.02409e+07	3.78814e+06	0	0	190569	0	0	0	0	0	0	0	0	0
	O00241	SIRB1_HUMAN	Signal-regulatory protein beta-1 (SIRP-beta-1) (CD172 antigen-like family member B) (CD antigen CD172b)	0	0	0	0	0	0	0	0	0	0	0	0	0	0	0	0	0	0	0	0	0	0	0	0	0	0	0	0	0	0	0	0	0	0	0	0	0	1.97848e+06	0	0	0	0	0	0	0	0
	Q96PX8	SLIK1_HUMAN	SLIT and NTRK-like protein 1 (Leucine-rich repeat-containing protein 12)	0	2.31801e+06	0	0	0	0	0	0	0	0	0	0	0	0	0	0	0	0	288296	0	0	0	0	0	2.03237e+06	0	0	0	0	0	0	0	0	0	0	3.60889e+06	2.41808e+06	2.82095e+06	2560507	1.21845e+06	0	2.73193e+06	555162	1.44073e+06	876911	1.37129e+06
	Q8WVQ1	CANT1_HUMAN	Soluble calcium-activated nucleotidase 1 (SCAN-1) (EC 3.6.1.6) (Apyrase homolog) (Putative MAPK-activating protein PM09) (Putative NF-kappa-B-activating protein 107)	0	0	0	0	0	0	0	0	0	0	0	0	0	0	0	0	0	0	0	0	0	0	0	0	843269	0	0	0	0	0	0	0	0	0	0	279519	264572	521793	0	0	0	0	0	0	0	0
	P61278	SMS_HUMAN	Somatostatin (Growth hormone release-inhibiting factor) [Cleaved into: Somatostatin-28; Somatostatin-14]	0	0	0	0	0	0	0	0	0	0	0	0	0	0	0	0	0	0	0	0	0	0	0	0	1.10337e+06	0	0	0	0	0	0	0	0	0	0	0	0	0	0	0	0	0	0	0	0	0
	Q99523	SORT_HUMAN	Sortilin (100 kDa NT receptor) (Glycoprotein 95) (Gp95) (Neurotensin receptor 3) (NT3) (NTR3)	0	166686	0	0	0	0	0	0	0	0	0	0	0	0	0	0	0	0	0	0	0	0	0	0	0	0	0	0	0	0	0	0	0	0	0	0	0	0	0	0	0	0	0	0	0	95371.4
	P09486	SPRC_HUMAN	SPARC (Basement-membrane protein 40) (BM-40) (Osteonectin) (ON) (Secreted protein acidic and rich in cysteine)	0	1.18889e+06	1.3561e+06	0	500511	286334	1.36831e+06	0	0	0	387252	0	0	1.25747e+06	786058	732807	801248	486304	552977	799901	779846	651232	0	0	1.41154e+06	0	434022	0	0	0	0	1.50187e+06	0	1.83322e+06	2.09255e+06	1.06938e+06	1.29827e+06	1.57908e+06	1.03155e+06	499927	692696	1.28144e+06	973525	1.86966e+06	1.35427e+06	1.48511e+06
	Q14515	SPRL1_HUMAN	SPARC-like protein 1 (High endothelial venule protein) (Hevin) (MAST 9)	1.56062e+06	3.249e+06	1.03103e+06	0	2.14392e+06	556891	771562	0	2.2278e+06	1.35301e+06	1.19725e+06	872239	403326	567497	877725	365723	589748	742572	1.10334e+06	672394	1.05388e+06	666311	2.45648e+06	418168	3.52931e+06	271164	106598	0	599631	595600	965046	1.9533e+06	2.52294e+06	4.56295e+06	2.47422e+06	2.47202e+06	2.57441e+06	2.96296e+06	2.59873e+06	1.41654e+06	1.55981e+06	2.64983e+06	1.12615e+06	2.35877e+06	1.64379e+06	1.98541e+06
	P02549	SPTA1_HUMAN	Spectrin alpha chain, erythrocytic 1 (Erythroid alpha-spectrin)	0	0	8.92925e+06	0	0	0	0	0	0	0	0	0	8.30001e+06	0	0	0	0	0	0	0	0	0	0	0	0	0	0	872845	0	3.44802e+06	0	0	0	0	0	0	0	0	0	6.42201e+06	3.43718e+06	0	0	0	0	0
	Q13813	SPTN1_HUMAN	Spectrin alpha chain, non-erythrocytic 1 (Alpha-II spectrin) (Fodrin alpha chain) (Spectrin, non-erythroid alpha subunit)	0	0	564588	0	0	0	340299	0	0	0	0	0	0	0	0	0	0	0	0	0	0	0	0	320111	0	0	0	0	0	0	484835	0	0	0	0	0	0	0	0	0	0	0	0	0	0	0
	P11277	SPTB1_HUMAN	Spectrin beta chain, erythrocytic (Beta-I spectrin)	0	0	506404	0	0	0	0	0	0	0	0	0	0	0	0	0	0	0	0	0	0	0	0	0	0	0	0	0	0	0	0	0	0	0	0	0	0	0	0	0	0	0	0	0	0	0
	Q01082	SPTB2_HUMAN	Spectrin beta chain, non-erythrocytic 1 (Beta-II spectrin) (Fodrin beta chain) (Spectrin, non-erythroid beta chain 1)	0	313762	0	0	0	0	0	0	0	0	0	0	0	0	0	0	0	0	0	0	0	0	0	0	0	0	0	0	0	0	0	0	0	0	0	0	0	0	0	0	0	0	0	0	0	0
	P16949	STMN1_HUMAN	Stathmin (Leukemia-associated phosphoprotein p18) (Metablastin) (Oncoprotein 18) (Op18) (Phosphoprotein p19) (pp19) (Prosolin) (Protein Pr22) (pp17)	0	0	0	0	1.18035e+06	0	0	0	0	0	0	0	0	0	0	0	0	0	0	0	3.54188e+07	0	0	0	0	0	0	0	0	0	0	0	0	0	0	0	0	0	0	0	0	0	0	0	0	0
	P08254	MMP3_HUMAN	Stromelysin-1 (SL-1) (EC 3.4.24.17) (Matrix metalloproteinase-3) (MMP-3) (Transin-1)	0	0	0	0	0	0	0	0	0	0	0	0	0	0	0	0	0	587885	0	0	0	0	0	0	0	0	0	0	0	0	0	0	2203705	0	0	0	0	0	0	0	0	0	0	0	0	0
	O00391	QSOX1_HUMAN	Sulfhydryl oxidase 1 (hQSOX) (EC 1.8.3.2) (Quiescin Q6)	1.94206e+06	1.2277e+06	624081	508128	594522	378212	841369	0	3.02723e+06	1.70918e+06	631329	1.45086e+06	1.4081e+06	0	874509	746539	1.51123e+06	711101	415526	711775	1.38196e+06	682049	2.20601e+06	563492	1.13472e+06	525010	121751	152914	236426	1.25254e+06	5.55573e+06	1.06097e+06	3.36379e+06	5.34239e+06	2.65256e+06	409461	392045	744319	1.16951e+06	778404	568685	563411	537779	1.16699e+06	813329	761105
	P00441	SODC_HUMAN	Superoxide dismutase [Cu-Zn] (EC 1.15.1.1) (Superoxide dismutase 1) (hSod1)	1.8486e+06	1.46501e+06	1.98668e+06	0	665472	701051	1.83318e+06	0	0	2.03015e+06	2.9652e+06	0	0	364033	1.10461e+06	0	1.59024e+06	1.59678e+06	1.12543e+06	993767	1.02266e+06	0	0	0	3206005	946074	0	0	482830	910571	1.62479e+06	0	2.82788e+06	0	0	571167	504232	1.03294e+06	1.50458e+06	2.08311e+06	830673	942923	634520	3.01116e+06	1.76945e+06	2.48713e+06
	P04179	SODM_HUMAN	Superoxide dismutase [Mn], mitochondrial (EC 1.15.1.1)	0	207113	2.05508e+06	0	479273	0	0	0	0	0	0	0	0	0	0	0	0	0	0	0	0	0	0	0	0	0	0	0	0	0	6.40831e+06	0	0	0	0	0	0	0	0	0	0	0	0	0	0	0
	O60279	SUSD5_HUMAN	Sushi domain-containing protein 5	716042	1.03508e+06	0	0	198178	0	161891	0	0	0	0	0	0	0	0	0	0	0	0	0	0	0	0	0	1.40496e+06	0	0	0	0	0	0	0	0	0	0	666083	593710	933611	0	0	0	607405	0	0	0	0
	Q99536	VAT1_HUMAN	Synaptic vesicle membrane protein VAT-1 homolog (EC 1.-.-.-)	910137	0	0	194254	78376.1	0	0	0	0	0	0	0	1.09342e+06	0	0	328805	0	0	0	0	620241	375100	0	2.16737e+06	0	0	0	0	0	0	4.5576e+06	0	1.50787e+06	427009	0	0	0	0	0	0	0	0	0	0	0	0
	Q9Y490	TLN1_HUMAN	Talin-1	498305	0	555475	0	422840	0	0	0	0	0	0	0	0	0	0	0	0	0	0	0	275372	0	795098	1.25833e+06	0	0	0	0	0	0	1.7115e+06	0	1.5376e+06	0	0	0	0	0	0	0	0	0	0	0	0	0
	Q7Z7G0	TARSH_HUMAN	Target of Nesh-SH3 (Tarsh) (ABI gene family member 3-binding protein) (Nesh-binding protein) (NeshBP)	0	0	0	0	1.2177e+06	0	0	0	0	0	0	0	0	0	0	0	0	0	0	0	0	0	0	0	0	0	0	0	0	0	0	0	1.1034e+06	0	0	0	0	0	0	0	0	0	0	0	0	0
	Q92752	TENR_HUMAN	Tenascin-R (TN-R) (Janusin) (Restrictin)	0	0	0	0	0	0	0	0	0	0	0	0	0	0	0	0	0	0	0	0	0	0	0	0	0	0	0	0	0	0	0	0	0	0	0	0	0	380607	0	0	0	0	0	0	195421	326217
	P22105	TENX_HUMAN	Tenascin-X (TN-X) (Hexabrachion-like protein)	737222	633108	0	0	771181	0	0	0	0	0	132954	1.63955e+06	573437	0	267149	398701	1.06323e+06	489904	178468	143714	495732	0	0	0	266331	0	0	0	0	0	3.45539e+06	0	447926	0	940864	349752	0	642579	625712	413102	0	281899	236415	720472	437185	456318
	Q08629	TICN1_HUMAN	Testican-1 (Protein SPOCK)	8.42593e+07	345995	0	0	131767	0	0	0	0	0	0	0	3.56185e+06	0	0	0	0	0	279864	0	0	0	0	0	1.32899e+06	0	0	0	1.56273e+06	1.8224e+06	356383756	3.54885e+07	6142525	0	4.452e+08	258283	945030	2.05147e+06	1.87836e+06	1.11524e+06	1.40377e+06	470876	196064	511986	413580	1.52706e+06
	Q92563	TICN2_HUMAN	Testican-2 (SPARC/osteonectin, CWCV, and Kazal-like domains proteoglycan 2)	0	0	0	0	80292.2	0	0	0	0	0	0	0	0	0	0	0	0	0	0	0	0	0	0	0	0	0	0	0	0	0	0	0	0	0	0	651274	505098	956789	0	0	0	845236	0	990022	0	2.60622e+06
	P05452	TETN_HUMAN	Tetranectin (TN) (C-type lectin domain family 3 member B) (Plasminogen kringle 4-binding protein)	3.62081e+06	3.0439e+06	997092	1.42495e+06	1.21014e+06	569570	1.00993e+06	0	5.18997e+06	2.6847e+06	2.59207e+06	2.91437e+06	2.29658e+06	0	1.38316e+06	1.44559e+06	2.45213e+06	1.11103e+06	1.05809e+06	477779	1.86228e+06	892225	4.56129e+06	1.14733e+06	2.99784e+06	364976	0	0	444550	1.13853e+06	2.89346e+06	1.27672e+06	4.09438e+06	1.75534e+07	6.41184e+06	3.35828e+06	2.23298e+06	4.28469e+06	2.81146e+06	1.99894e+06	1.56155e+06	3.13064e+06	1.58367e+06	3.62124e+06	1.83921e+06	2.26349e+06
	P10599	THIO_HUMAN	Thioredoxin (Trx) (ATL-derived factor) (ADF) (Surface-associated sulphydryl protein) (SASP)	2.64219e+06	0	0	9.52575e+06	2.25408e+06	0	1.8947e+06	0	0	0	0	0	0	0	0	1.00391e+06	0	0	0	0	1.56538e+06	0	0	0	885029	0	0	0	0	0	2.81352e+07	0	6.92699e+06	0	0	874581	0	1.06974e+06	0	0	0	808470	0	772062	0	309776
	Q9BRA2	TXD17_HUMAN	Thioredoxin domain-containing protein 17 (14 kDa thioredoxin-related protein) (TRP14) (Protein 42-9-9) (Thioredoxin-like protein 5)	986587	0	0	0	0	0	0	0	0	0	0	0	0	0	0	0	0	0	0	0	330672	0	1.74374e+06	708622	0	0	0	0	0	0	2.24994e+06	0	2.18883e+06	0	0	0	0	0	0	0	0	0	0	0	0	0
	P30048	PRDX3_HUMAN	Thioredoxin-dependent peroxide reductase, mitochondrial (EC 1.11.1.15) (Antioxidant protein 1) (AOP-1) (HBC189) (Peroxiredoxin III) (Prx-III) (Peroxiredoxin-3) (Protein MER5 homolog)	913914	0	0	0	0	0	0	0	0	0	0	0	0	0	0	0	0	0	0	0	0	0	1.12526e+06	1.31679e+06	0	0	0	0	0	0	0	0	1.50292e+06	0	0	0	0	0	0	0	0	0	0	0	0	0
	P07996	TSP1_HUMAN	Thrombospondin-1	1.10146e+06	0	371068	0	0	0	0	0	2.58493e+06	0	0	0	1.17745e+06	0	394760	880456	1.30115e+06	758620	0	340891	1.85135e+06	1.32272e+06	801904	0	0	0	0	0	0	1.31261e+06	1.55013e+06	641788	1.88239e+06	4.59128e+06	1.94441e+06	0	0	0	0	0	0	0	0	0	0	0
	P04216	THY1_HUMAN	Thy-1 membrane glycoprotein (CDw90) (Thy-1 antigen) (CD antigen CD90)	6.66886e+06	7.00104e+06	1.18668e+06	0	2.4699e+06	671229	1.5683e+06	0	0	3.18502e+06	5.57373e+06	0	802661	494201	0	0	0	875336	4.90487e+06	660357	5.04891e+06	0	5.16936e+06	0	1.37116e+07	0	0	0	1.01961e+06	0	0	0	1.41294e+07	0	2840674	5.17415e+06	6.26256e+06	7.74044e+06	4.44145e+06	3.23576e+06	2.01426e+06	4.78123e+06	2.54575e+06	5699684	4.18831e+06	6.42658e+06
	P19971	TYPH_HUMAN	Thymidine phosphorylase (TP) (EC 2.4.2.4) (Gliostatin) (Platelet-derived endothelial cell growth factor) (PD-ECGF) (TdRPase)	1.42133e+06	0	0	0	0	0	0	0	0	0	0	0	0	0	0	0	0	0	0	0	246393	0	6.10448e+06	0	0	0	0	0	0	0	0	0	3.58354e+06	0	0	0	0	0	0	0	0	0	0	0	0	0
	P63313	TYB10_HUMAN	Thymosin beta-10	2.88111e+06	0	0	0	357028	0	1.03379e+06	0	0	0	0	0	1.86062e+06	0	0	750776	0	0	0	442443	1.26899e+06	860135	1.41693e+07	0	0	0	0	0	0	1.14858e+06	5.8495e+06	0	4.76523e+06	0	0	0	0	0	0	0	0	0	0	0	0	0
	P62328	TYB4_HUMAN	Thymosin beta-4 (T beta-4) (Fx) [Cleaved into: Hematopoietic system regulatory peptide (Seraspenide)]	8.6196e+06	3.95635e+06	6.22602e+06	2.59614e+06	5.41081e+06	3.59347e+06	1.02893e+07	1.50317e+06	0	8.06698e+06	0	1.37935e+07	7.26355e+06	695325	2.25014e+06	4.86091e+06	3.34838e+06	1.12282e+06	1.22564e+06	1.65672e+06	6.23382e+06	4.10553e+06	2.4525e+07	2.86564e+07	1.6628e+06	712503	1.55346e+06	372448	0	5.11688e+06	4.06911e+07	6.3538e+06	4.23951e+07	1.62279e+07	8.80753e+06	1.95053e+06	1.08489e+06	1.36053e+06	2.70243e+06	1.79117e+06	1.58862e+06	1.78674e+06	1.65199e+06	1.11476e+06	2.44932e+06	2.97824e+06
	P05543	THBG_HUMAN	Thyroxine-binding globulin (Serpin A7) (T4-binding globulin)	2.27444e+06	558149	1.3742e+06	2.00464e+06	329189	854605	1.56689e+06	244596	1.20443e+07	4.60183e+06	3.9989e+06	3.01222e+06	2.35272e+06	204205	1.87913e+06	1.94434e+06	2.37336e+06	1.83988e+06	496324	1.08384e+06	1.74077e+06	1.60657e+06	4.57858e+06	1.12387e+06	536423	991834	342558	463539	280931	1.45564e+06	5.5011e+06	2.65336e+06	2.67861e+06	1.2434e+07	7.204e+06	776251	479946	983440	1.49782e+06	1.40748e+06	994569	711247	538269	1.17441e+06	638655	1.35128e+06
	P04066	FUCO_HUMAN	Tissue alpha-L-fucosidase (EC 3.2.1.51) (Alpha-L-fucosidase I) (Alpha-L-fucoside fucohydrolase 1) (Alpha-L-fucosidase 1)	0	344339	0	0	0	0	189377	0	0	0	0	0	0	0	0	0	0	0	261517	0	0	0	0	488427	600414	0	0	0	0	0	0	0	1.12436e+06	0	0	223107	192105	344643	504417	188581	0	593159	0	289004	278726	353749
	O43493	TGON2_HUMAN	Trans-Golgi network integral membrane protein 2 (TGN38 homolog) (TGN46) (TGN48) (Trans-Golgi network protein TGN51)	1.34942e+06	980580	0	82808.9	405632	0	0	0	0	0	0	357785	0	0	0	0	0	128933	341631	0	176670	0	0	0	833605	0	0	0	182222	252389	1.2551e+06	0	1.68023e+06	0	352486	1.03419e+06	656575	1.13146e+06	694361	442272	396740	876369	401785	981705	653442	715604
	P37837	TALDO_HUMAN	Transaldolase (EC 2.2.1.2)	4.70869e+06	0	3.59881e+06	2.03992e+06	1.89457e+06	0	2.74014e+06	0	0	0	0	4.03086e+06	3.02414e+06	0	483437	1.70103e+06	0	0	0	686463	1.71829e+06	1.87609e+06	5.90205e+06	1.10327e+07	0	0	593412	0	0	2.05245e+06	1.17447e+07	0	1.40255e+07	0	0	0	0	0	0	0	0	0	0	0	0	0
	P20061	TCO1_HUMAN	Transcobalamin-1 (TC-1) (Haptocorrin) (HC) (Protein R) (Transcobalamin I) (TC I) (TCI)	0	0	0	0	0	0	0	0	0	0	0	0	0	0	0	0	0	0	0	0	693349	1.30408e+06	0	0	0	0	0	0	0	0	0	1.01869e+06	0	0	2.36877e+06	0	0	0	0	0	0	0	0	0	0	0
	P20062	TCO2_HUMAN	Transcobalamin-2 (TC-2) (Transcobalamin II) (TC II) (TCII)	1.63311e+06	269985	0	0	139356	0	0	0	0	0	0	0	0	0	0	0	0	0	178389	0	527316	0	0	0	0	0	0	0	0	610282	0	0	795032	0	0	0	113677	238641	403808	565443	0	121099	0	427752	160091	268884
	P02786	TFR1_HUMAN	Transferrin receptor protein 1 (TR) (TfR) (TfR1) (Trfr) (T9) (p90) (CD antigen CD71) [Cleaved into: Transferrin receptor protein 1, serum form (sTfR)]	0	0	0	0	0	0	0	0	0	0	0	0	0	0	0	0	0	0	0	0	0	0	1.69138e+06	0	0	0	0	0	0	0	1.26041e+06	0	0	0	0	0	0	0	0	0	0	0	0	0	0	0
	Q03167	TGBR3_HUMAN	Transforming growth factor beta receptor type 3 (TGF-beta receptor type 3) (TGFR-3) (Betaglycan) (Transforming growth factor beta receptor III) (TGF-beta receptor type III)	0	440628	0	0	0	0	0	0	0	0	0	0	0	0	0	0	0	0	0	0	0	0	0	0	406443	0	0	0	0	0	0	0	0	0	0	351086	318571	616966	0	0	0	364129	0	470906	0	0
	Q15582	BGH3_HUMAN	Transforming growth factor-beta-induced protein ig-h3 (Beta ig-h3) (Kerato-epithelin) (RGD-containing collagen-associated protein) (RGD-CAP)	1.6605e+06	1.62256e+06	2.0779e+06	0	898229	263546	531518	291077	2.69083e+06	1.34179e+06	966638	1.24251e+06	1.1791e+06	0	1.2979e+06	545237	1.38126e+06	760221	565711	349212	1.67642e+06	1.22241e+06	2.43287e+06	290688	1.98461e+06	761792	0	0	337083	1.51382e+06	9.70779e+06	1.20004e+06	4.83734e+06	7.43646e+06	1.98909e+06	953197	602346	1.10852e+06	1.41382e+06	1.44723e+06	619334	1.02903e+06	461832	1.14628e+06	538162	817304
	Q01995	TAGL_HUMAN	Transgelin (22 kDa actin-binding protein) (Protein WS3-10) (Smooth muscle protein 22-alpha) (SM22-alpha)	412859	335651	0	0	0	0	0	0	0	0	0	0	0	0	0	0	0	0	0	0	159338	0	0	0	0	0	0	0	0	0	0	0	0	0	0	0	234946	0	0	0	0	0	0	0	0	0
	P37802	TAGL2_HUMAN	Transgelin-2 (Epididymis tissue protein Li 7e) (SM22-alpha homolog)	0	0	1.93713e+06	0	0	0	0	0	0	0	0	0	1.0243e+06	0	0	0	0	0	0	0	430201	0	1.9967e+06	0	0	0	0	0	0	0	0	0	2878712	0	0	0	0	0	0	0	0	0	0	0	0	0
	P29401	TKT_HUMAN	Transketolase (TK) (EC 2.2.1.1)	2.44032e+06	0	4.81183e+06	1.45351e+06	1.57035e+06	345031	2.44744e+06	268909	2.54909e+06	1.75323e+06	1.03409e+06	4.13901e+06	2.41372e+06	146604	733913	1.74308e+06	663540	402189	0	603472	1.52955e+06	851481	2.7116e+06	5.36424e+06	0	506038	594835	81143.6	91783.8	1.09775e+06	1.29055e+07	309698	5.73354e+06	2.40515e+06	1.40821e+06	0	0	0	0	0	0	0	0	0	0	0
	Q24JP5	T132A_HUMAN	Transmembrane protein 132A (HSPA5-binding protein 1)	0	539579	0	0	221083	0	0	0	0	0	0	0	0	0	0	0	0	0	0	0	0	0	0	0	971710	0	0	0	0	223881	0	0	0	0	0	611004	314238	2.95285e+06	265936	190592	0	244611	221795	700480	468346	755401
	P02766	TTHY_HUMAN	Transthyretin (ATTR) (Prealbumin) (TBPA)	1.46878e+07	3.42797e+07	3.1157e+07	2.53333e+07	2.04506e+07	2.06968e+07	4.00606e+07	1.73489e+07	3.47624e+07	5.83947e+07	2.47176e+07	2.25096e+07	1.92606e+07	2.98042e+07	2.24529e+07	4.83782e+07	4.22266e+07	2.52489e+07	4.0078e+07	2.2466e+07	44583541	1.73543e+07	1.97275e+07	1.32676e+07	3.33899e+07	1.8152e+07	2.32158e+07	1.40893e+07	1.52732e+07	2.04672e+07	5.98756e+07	2.69935e+07	3.09466e+07	8.40135e+07	3.8336e+07	2.65388e+07	1.36158e+07	2.50451e+07	4.17706e+07	2.46638e+07	2.48823e+07	2.9078e+07	1.70745e+07	4.20487e+07	3.1704e+07	2.98627e+07
	Q9NZC2	TREM2_HUMAN	Triggering receptor expressed on myeloid cells 2 (TREM-2) (Triggering receptor expressed on monocytes 2)	0	0	0	0	0	0	0	0	0	0	0	0	0	0	0	0	0	0	0	0	0	0	0	0	0	0	0	0	0	0	0	0	0	0	0	0	0	0	0	0	0	0	0	0	0	0
	P60174	TPIS_HUMAN	Triosephosphate isomerase (TIM) (EC 5.3.1.1) (Triose-phosphate isomerase)	1.44913e+06	562710	4.27011e+06	714241	806227	1.45521e+06	3.40651e+06	194038	0	2.10177e+06	0	2.32507e+06	1.74877e+06	251950	823299	1.25081e+06	1.3772e+06	616084	174541	933362	1.51501e+06	847047	4.66806e+06	2.45751e+06	802532	0	423653	201339	0	703167	5.15196e+06	0	4.23005e+06	0	0	356369	287016	382579	716541	363406	359455	401732	465161	663213	595099	679733
	O14773	TPP1_HUMAN	Tripeptidyl-peptidase 1 (TPP-1) (EC 3.4.14.9) (Cell growth-inhibiting gene 1 protein) (Lysosomal pepstatin-insensitive protease) (LPIC) (Tripeptidyl aminopeptidase) (Tripeptidyl-peptidase I) (TPP-I)	0	586935	0	0	130549	0	762608	0	0	0	0	0	0	245509	0	0	0	0	226249	388710	473074	433456	0	0	571665	0	0	0	0	0	0	0	0	0	0	237822	314644	724143	694487	0	0	299632	0	607618	600744	371153
	P06753	TPM3_HUMAN	Tropomyosin alpha-3 chain (Gamma-tropomyosin) (Tropomyosin-3) (Tropomyosin-5) (hTM5)	2.62557e+06	0	1.63305e+06	0	708031	0	0	0	0	0	0	0	1571818	0	0	0	0	0	0	306040	1.80124e+06	0	0	5.06946e+06	0	0	0	0	0	0	9.61204e+06	0	8.25533e+06	0	0	0	0	0	0	0	0	0	0	0	0	0
	P67936	TPM4_HUMAN	Tropomyosin alpha-4 chain (TM30p1) (Tropomyosin-4)	0	0	0	0	0	0	0	0	0	0	0	0	0	0	0	0	0	0	0	0	0	0	1.53627e+06	0	0	0	0	0	0	132453	0	0	0	0	0	0	0	0	0	0	0	0	0	0	0	0
	P07478	TRY2_HUMAN	Trypsin-2 (EC 3.4.21.4) (Anionic trypsinogen) (Serine protease 2) (Trypsin II)	0	0	0	0	0	0	0	0	0	0	0	0	0	0	0	0	0	0	0	0	0	0	0	0	0	0	0	0	0	0	1.5184e+07	0	0	0	0	0	0	0	0	0	0	0	0	0	0	0
	P23381	SYWC_HUMAN	Tryptophan--tRNA ligase, cytoplasmic (EC 6.1.1.2) (Interferon-induced protein 53) (IFP53) (Tryptophanyl-tRNA synthetase) (TrpRS) (hWRS) [Cleaved into: T1-TrpRS; T2-TrpRS]	1.42273e+06	0	0	0	0	0	0	0	0	0	0	0	627506	0	0	0	0	0	0	0	937790	0	6.8265e+06	0	0	0	0	0	0	650275	2.44044e+06	0	1.74582e+06	0	0	0	0	0	0	0	0	0	0	0	0	0
	P68366	TBA4A_HUMAN	Tubulin alpha-4A chain (Alpha-tubulin 1) (Testis-specific alpha-tubulin) (Tubulin H2-alpha) (Tubulin alpha-1 chain)	0	0	0	0	0	0	1.42126e+06	0	0	0	0	0	0	0	0	0	0	0	0	0	0	0	0	1.9396e+06	0	0	0	0	0	0	0	0	0	0	0	0	0	0	0	0	0	0	0	0	0	0
	P07437	TBB5_HUMAN	Tubulin beta chain (Tubulin beta-5 chain)	0	0	0	0	0	0	0	0	0	0	0	0	1.8553e+06	0	0	0	0	0	0	0	0	0	3.09026e+06	0	0	0	0	0	0	0	0	0	0	0	0	0	0	0	0	0	0	0	0	0	0	0
	P04350	TBB4A_HUMAN	Tubulin beta-4A chain (Tubulin 5 beta) (Tubulin beta-4 chain)	0	0	0	0	0	0	932094	0	0	0	0	0	0	0	0	0	0	0	0	447315	0	0	0	0	0	0	0	0	0	0	0	0	0	0	0	0	0	0	0	0	0	0	0	0	0	0
	O75347	TBCA_HUMAN	Tubulin-specific chaperone A (TCP1-chaperonin cofactor A) (Tubulin-folding cofactor A) (CFA)	691773	0	0	0	0	0	0	0	0	0	0	0	0	0	0	0	0	0	0	0	0	0	0	0	0	0	0	0	0	0	0	0	0	0	0	0	0	0	0	0	0	0	0	0	0	0
	O75509	TNR21_HUMAN	Tumor necrosis factor receptor superfamily member 21 (Death receptor 6) (CD antigen CD358)	0	689662	0	0	0	0	0	0	0	0	0	0	0	0	0	0	0	0	221375	0	0	0	0	0	797640	0	0	0	0	0	0	0	0	0	0	0	0	0	0	0	0	0	0	0	0	530758
	P98066	TSG6_HUMAN	Tumor necrosis factor-inducible gene 6 protein (Hyaluronate-binding protein) (TNF-stimulated gene 6 protein) (TSG-6) (Tumor necrosis factor alpha-induced protein 6) (TNF alpha-induced protein 6)	0	0	0	0	0	0	0	0	0	0	0	789448	2.23368e+06	0	805922	424242	2.49656e+06	0	0	511740	0	1.50776e+06	1.5348e+06	0	0	0	0	0	0	0	0	0	0	2.42276e+06	928252	0	0	0	0	0	0	0	0	0	0	0
	P30530	UFO_HUMAN	Tyrosine-protein kinase receptor UFO (EC 2.7.10.1) (AXL oncogene)	1.00177e+06	1.03761e+06	0	0	565083	0	0	0	0	0	0	0	0	0	0	0	0	0	397890	0	0	0	4.21746e+06	0	1.30069e+06	0	0	0	251417	0	0	0	0	0	0	467664	625303	675324	1.44565e+06	0	0	653119	569272	895207	1.0898e+06	1.22598e+06
	P29350	PTN6_HUMAN	Tyrosine-protein phosphatase non-receptor type 6 (EC 3.1.3.48) (Hematopoietic cell protein-tyrosine phosphatase) (Protein-tyrosine phosphatase 1C) (PTP-1C) (Protein-tyrosine phosphatase SHP-1) (SH-PTP1)	0	0	0	0	0	0	0	0	0	0	0	0	0	0	0	0	0	0	0	0	0	0	0	1.02015e+06	0	0	0	0	0	0	0	0	0	0	0	0	3.34148e+06	0	0	0	0	0	0	0	0	0
	P78324	SHPS1_HUMAN	Tyrosine-protein phosphatase non-receptor type substrate 1 (SHP substrate 1) (SHPS-1) (Brain Ig-like molecule with tyrosine-based activation motifs) (Bit) (CD172 antigen-like family member A) (Inhibitory receptor SHPS-1) (Macrophage fusion receptor) (MyD-1 antigen) (Signal-regulatory protein alpha-1) (Sirp-alpha-1) (Signal-regulatory protein alpha-2) (Sirp-alpha-2) (Signal-regulatory protein alph…	0	0	0	0	888504	0	0	0	0	0	0	0	0	0	0	0	0	0	0	0	0	0	0	0	1.84149e+06	0	0	0	0	0	0	0	3.5199e+06	0	0	0	1.38468e+06	0	1.47443e+06	0	0	1592958	0	0	1.59937e+06	0
	P09936	UCHL1_HUMAN	Ubiquitin carboxyl-terminal hydrolase isozyme L1 (UCH-L1) (EC 3.4.19.12) (EC 6.-.-.-) (Neuron cytoplasmic protein 9.5) (PGP 9.5) (PGP9.5) (Ubiquitin thioesterase L1)	0	0	0	0	0	0	2.14934e+06	0	0	0	0	0	0	0	0	0	0	0	0	410560	0	0	0	0	0	0	0	0	0	0	0	0	0	0	0	0	0	0	0	0	0	0	0	0	0	0
	P22314	UBA1_HUMAN	Ubiquitin-like modifier-activating enzyme 1 (EC 6.2.1.45) (Protein A1S9) (Ubiquitin-activating enzyme E1)	0	0	0	0	0	0	0	0	0	0	0	0	0	0	0	0	0	0	0	0	0	0	1.95771e+06	0	0	0	0	0	0	0	0	0	0	0	0	0	0	0	0	0	0	0	0	0	0	0
	Q6UX73	CP089_HUMAN	UPF0764 protein C16orf89	0	1.08279e+06	0	0	0	0	0	0	0	0	0	0	0	0	0	0	0	0	200624	0	0	0	0	0	1.76464e+06	0	0	0	0	0	0	0	0	0	0	486896	614633	1.14681e+06	923040	1.31446e+06	0	750409	649973	1.29456e+06	968542	1.48707e+06
	Q03405	UPAR_HUMAN	Urokinase plasminogen activator surface receptor (U-PAR) (uPAR) (Monocyte activation antigen Mo3) (CD antigen CD87)	0	0	0	0	0	0	0	0	0	0	0	0	0	0	0	0	0	0	0	0	0	561836	0	0	0	0	0	0	0	0	0	0	0	0	0	0	0	0	0	0	0	0	0	0	0	0
	Q16851	UGPA_HUMAN	UTP--glucose-1-phosphate uridylyltransferase (EC 2.7.7.9) (UDP-glucose pyrophosphorylase) (UDPGP) (UGPase)	0	0	0	0	0	0	0	0	0	0	0	0	0	0	0	0	0	0	0	0	0	0	0	0	0	0	0	0	0	0	0	0	3.17155e+06	0	0	0	0	0	0	0	0	0	0	0	0	0
	Q9Y279	VSIG4_HUMAN	V-set and immunoglobulin domain-containing protein 4 (Protein Z39Ig)	3.3442e+06	464999	2.0616e+06	0	1.32588e+06	577378	0	0	0	1.48855e+06	1.35728e+06	0	0	0	719344	0	195062	491950	512077	0	1.37056e+06	0	7.59213e+06	0	0	744527	0	0	841790	1.21659e+06	7.61403e+06	0	7.18326e+06	0	0	68860.6	0	0	0	0	0	198693	0	0	0	0
	Q8TAG5	VTM2A_HUMAN	V-set and transmembrane domain-containing protein 2A	1.07493e+06	1.48571e+06	0	0	751328	0	0	0	0	0	0	0	0	0	0	0	0	0	460927	0	660242	0	0	0	1.63002e+06	0	0	0	0	0	0	0	1.77496e+06	0	0	1.67978e+06	686700	1.17907e+06	893736	710978	0	950959	460997	732670	470964	673518
	A6NLU5	VTM2B_HUMAN	V-set and transmembrane domain-containing protein 2B	0	0	0	0	0	0	0	0	0	0	284582	0	0	0	0	0	0	0	0	0	0	0	0	0	0	0	0	0	0	0	0	0	0	0	0	0	845693	662014	0	0	0	501232	302308	0	404761	542612
	Q15904	VAS1_HUMAN	V-type proton ATPase subunit S1 (V-ATPase subunit S1) (Protein XAP-3) (V-ATPase Ac45 subunit) (V-ATPase S1 accessory protein) (Vacuolar proton pump subunit S1)	2.4933e+06	1.05343e+06	0	0	246917	0	0	0	0	0	0	0	0	0	0	0	0	0	392061	0	720347	0	1.87309e+06	0	2.87389e+06	0	0	0	264336	0	2.78313e+06	0	2.31419e+06	0	0	1.10241e+06	897001	1.78767e+06	2.12792e+06	1.94183e+06	1.41567e+06	1.07881e+06	779999	1.71233e+06	1.26566e+06	1.64606e+06
	P19320	VCAM1_HUMAN	Vascular cell adhesion protein 1 (V-CAM 1) (VCAM-1) (INCAM-100) (CD antigen CD106)	1.39336e+06	998605	0	0	355894	176945	0	0	0	1669840	0	0	0	0	286871	0	0	0	0	169303	700825	0	3.40091e+06	0	750097	0	0	0	0	1.04712e+06	5.48105e+06	1.21299e+06	3.81745e+06	0	3.49081e+06	425206	295914	374327	586630	721498	0	420844	0	0	0	0
	P50552	VASP_HUMAN	Vasodilator-stimulated phosphoprotein (VASP)	837120	0	547713	312805	441674	0	295560	0	0	0	0	0	327227	0	0	237664	0	0	0	0	469164	0	358712	2.90474e+06	0	0	0	0	0	0	2.3028e+06	0	7.05735e+06	0	0	0	0	0	0	0	0	0	0	0	0	0
	Q6EMK4	VASN_HUMAN	Vasorin (Protein slit-like 2)	1.19333e+06	1.17829e+06	0	0	379493	0	0	0	0	0	0	0	0	0	0	483103	0	325878	230588	0	618084	0	2.08162e+06	0	854106	0	0	0	0	0	0	0	2.67848e+06	5.23227e+06	0	691730	511435	654129	0	0	0	721807	0	0	376325	467840
	P13611	CSPG2_HUMAN	Versican core protein (Chondroitin sulfate proteoglycan core protein 2) (Chondroitin sulfate proteoglycan 2) (Glial hyaluronate-binding protein) (GHAP) (Large fibroblast proteoglycan) (PG-M)	2.36608e+06	1.00498e+06	1.50252e+06	0	480011	690247	1.11482e+06	0	3.06418e+06	5.29733e+06	0	1.24205e+06	1.86164e+06	0	577371	433936	3.44359e+06	1.50759e+06	501560	669531	3.20722e+06	1.84922e+06	3.99059e+06	0	1.30228e+06	467788	0	0	0	3.6845e+06	1.16705e+07	0	8.65136e+06	3.68581e+06	4.53555e+06	459493	360553	894335	0	0	0	652704	677500	1.15677e+06	912935	841339
	Q12907	LMAN2_HUMAN	Vesicular integral-membrane protein VIP36 (Glycoprotein GP36b) (Lectin mannose-binding 2) (Vesicular integral-membrane protein 36) (VIP36)	1.29657e+06	1.0588e+06	0	0	323681	0	221353	0	0	0	0	0	0	0	0	0	0	0	314239	0	1.14217e+06	0	1.10462e+06	0	1.00065e+06	0	0	0	121012	431504	3.84895e+06	0	3.49389e+06	0	0	509272	479092	712423	754881	829198	248490	580559	390063	1.17075e+06	799913	949240
	P08670	VIME_HUMAN	Vimentin	4.25038e+06	239730	5.30612e+06	1.34939e+06	473841	614689	1.22769e+06	258636	0	1.64907e+06	0	1.4299e+06	2.35949e+06	0	1.68653e+06	1.32107e+06	6.35271e+06	716468	0	1.37459e+06	1.72346e+06	2.10363e+06	1.65275e+07	6.17129e+06	0	303415	330385	0	527484	3.86892e+06	1.26319e+07	520375	1.01597e+07	5.19432e+06	3.01478e+06	0	0	0	351638	0	431783	0	0	0	0	0
	P18206	VINC_HUMAN	Vinculin (Metavinculin) (MV)	564983	0	290282	0	359040	0	0	0	0	0	0	0	0	0	0	0	0	0	0	0	263670	185221	979324	1.74168e+06	0	0	0	0	0	0	3.32724e+06	0	2.47248e+06	0	0	0	0	0	0	0	0	0	0	0	0	0
	P02774	VTDB_HUMAN	Vitamin D-binding protein (DBP) (VDB) (Gc protein-derived macrophage activating factor) (Gc-MAF) (GcMAF) (Gc-globulin) (Group-specific component) (Gc) (Vitamin D-binding protein-macrophage activating factor) (DBP-maf)	2.65243e+07	6.56758e+06	1.65187e+07	1.15035e+07	3.44549e+06	7.4633e+06	1.0739e+07	2.06605e+06	1.23423e+08	3.51225e+07	1.30576e+07	3.12232e+07	2.40129e+07	1.22847e+06	2.84331e+07	1.57549e+07	3.61309e+07	1.5792e+07	4.94191e+06	7.64602e+06	1.85561e+07	1.36811e+07	5.47815e+07	1.88788e+07	4.48207e+06	3.79425e+06	3.70722e+06	3.44956e+06	4.03193e+06	1.02054e+07	3.22101e+07	2.44955e+07	3.13546e+07	1.96994e+08	9.94709e+07	1.14772e+07	7.63826e+06	1.14108e+07	1.29693e+07	1.1108e+07	7.73943e+06	8.31424e+06	7.41738e+06	1.27604e+07	6.10939e+06	1.37497e+07
	P04070	PROC_HUMAN	Vitamin K-dependent protein C (EC 3.4.21.69) (Anticoagulant protein C) (Autoprothrombin IIA) (Blood coagulation factor XIV) [Cleaved into: Vitamin K-dependent protein C light chain; Vitamin K-dependent protein C heavy chain; Activation peptide]	0	0	0	0	98166.3	0	0	0	0	0	0	660364	0	0	0	0	0	0	0	0	0	0	0	0	0	0	0	0	0	0	0	0	0	6.73724e+06	0	0	0	0	0	0	0	0	0	0	0	0
	P07225	PROS_HUMAN	Vitamin K-dependent protein S	1.8853e+06	1.81663e+06	1.41277e+06	1.66606e+06	607568	863534	1.14294e+06	351053	1.10689e+07	3.72975e+06	1.94205e+06	6.03026e+06	3.34921e+06	263490	3.45737e+06	1.64961e+06	4.65797e+06	1.92946e+06	1.03043e+06	1.01177e+06	2.04341e+06	1.27143e+06	3.31962e+06	818454	1.5904e+06	1.36971e+06	500936	293771	567823	952022	6.66231e+06	2.72334e+06	3.54756e+06	1.36374e+07	1.15017e+07	1.25539e+06	709723	1.23513e+06	1.4411e+06	1.18898e+06	934114	1.03526e+06	851916	2.42574e+06	1.30328e+06	1.44146e+06
	P04004	VTNC_HUMAN	Vitronectin (VN) (S-protein) (Serum-spreading factor) (V75) [Cleaved into: Vitronectin V65 subunit; Vitronectin V10 subunit; Somatomedin-B]	1.83664e+07	6.05224e+06	1.06901e+07	1.83288e+07	3.90604e+06	6.8672e+06	9.51313e+06	1.79912e+06	1.64392e+08	3.89242e+07	1.67339e+07	3.00604e+07	2.3462e+07	306188	2.27812e+07	1.50981e+07	3.57865e+07	1.10855e+07	4.0566e+06	1.08395e+07	1.40017e+07	1.97593e+07	5.20796e+07	2.71134e+07	3.62633e+06	7.66119e+06	3.56872e+06	6.53491e+06	4.18485e+06	1.6917e+07	2.25836e+07	4.91069e+07	2.1978e+07	2.22858e+08	1.15055e+08	8.70883e+06	3.69338e+06	5.60855e+06	9.9366e+06	1.04846e+07	8.54506e+06	5.12527e+06	6.14687e+06	1.05969e+07	6.58849e+06	1.34824e+07
	P54289	CA2D1_HUMAN	Voltage-dependent calcium channel subunit alpha-2/delta-1 (Voltage-gated calcium channel subunit alpha-2/delta-1) [Cleaved into: Voltage-dependent calcium channel subunit alpha-2-1; Voltage-dependent calcium channel subunit delta-1]	706450	1.08164e+06	0	0	299511	0	0	0	0	316944	700488	0	0	0	0	0	0	0	279439	0	644514	0	854312	0	1.26693e+06	0	0	0	89838.2	441960	0	276281	1.27397e+06	0	0	639549	606629	810877	622900	574950	0	735255	414527	743200	665237	889808
	P04275	VWF_HUMAN	von Willebrand factor (vWF) [Cleaved into: von Willebrand antigen 2 (von Willebrand antigen II)]	501925	474122	0	456090	0	466845	428157	0	5.62444e+06	1.01999e+06	1.10883e+06	1.70451e+06	1.07576e+06	0	796643	1.05529e+06	1.47751e+06	725320	0	402013	612409	1.20783e+06	642126	244503	0	458720	186475	0	331968	0	573796	1.87557e+06	1.10223e+06	6.34293e+06	5.4452e+06	0	0	0	0	0	0	0	0	0	0	0
	Q9UPU3	SORC3_HUMAN	VPS10 domain-containing receptor SorCS3	0	0	0	0	0	0	0	0	0	464023	0	0	0	0	0	0	0	0	0	0	0	0	0	0	547636	0	0	0	0	0	0	0	0	0	0	0	429457	464502	0	0	0	192703	0	0	0	431189
	Q14508	WFDC2_HUMAN	WAP four-disulfide core domain protein 2 (Epididymal secretory protein E4) (Major epididymis-specific protein E4) (Putative protease inhibitor WAP5)	0	0	0	0	0	0	0	0	0	0	0	0	0	0	0	0	0	0	0	0	0	0	0	0	0	0	0	0	0	0	0	0	0	0	0	0	290239	482067	0	0	0	346566	0	0	0	0
	Q8TEU8	WFKN2_HUMAN	WAP, Kazal, immunoglobulin, Kunitz and NTR domain-containing protein 2 (Growth and differentiation factor-associated serum protein 1) (GASP-1) (hGASP-1) (WAP, follistatin, immunoglobulin, Kunitz and NTR domain-containing-related protein) (WFIKKN-related protein)	705539	1.20233e+06	1.07394e+06	0	607596	684734	988536	0	0	0	931352	0	0	0	0	59211.2	0	1.70757e+06	530247	326611	670213	0	0	0	1.56942e+06	0	0	0	0	1.82808e+06	4.12377e+06	1.28702e+06	957161	214994	3.18373e+06	863268	627821	813753	1.054e+06	764981	0	1.25731e+06	269729	1.53898e+06	1.13455e+06	1.25342e+06
	O75083	WDR1_HUMAN	WD repeat-containing protein 1 (Actin-interacting protein 1) (AIP1) (NORI-1)	1.59748e+06	0	670166	873077	0	0	1.23049e+06	0	0	0	0	1.14978e+06	1.25695e+06	0	0	957699	0	0	0	0	1.10334e+06	0	4.28152e+06	3.23236e+06	0	0	0	0	0	728754	3.2505e+06	0	2.07275e+06	0	0	0	0	0	0	0	0	0	0	0	0	0
	Q96KR1	ZFR_HUMAN	Zinc finger RNA-binding protein (hZFR) (M-phase phosphoprotein homolog)	6.3599e+08	5.20773e+08	0	2.38027e+08	1.16847e+08	3.24799e+08	0	0	0	0	7.69901e+07	1.66165e+09	9.59912e+08	5.21328e+07	1.08744e+09	5.60995e+08	1.23656e+09	7.1413e+08	3.73229e+08	230761744	7.52939e+08	5.62666e+08	0	2.76441e+08	9.30542e+07	0	0	0	0	3.41483e+08	1.4369e+09	1.28868e+09	2.16081e+09	6.05561e+08	2.31385e+08	1.38368e+09	3.94662e+08	9.62803e+08	1.11389e+09	768765293	5.172e+08	6.30513e+08	3.18525e+08	2.59981e+08	2.31166e+08	4.6391e+08
	Q9ULF5	S39AA_HUMAN	Zinc transporter ZIP10 (Solute carrier family 39 member 10) (Zrt- and Irt-like protein 10) (ZIP-10)	0	583329	0	0	0	0	0	0	0	0	0	0	0	0	0	0	0	0	0	0	0	0	0	0	898854	0	0	0	0	0	0	0	0	0	0	532163	293199	471591	0	0	0	0	0	0	0	730968
	P25311	ZA2G_HUMAN	Zinc-alpha-2-glycoprotein (Zn-alpha-2-GP) (Zn-alpha-2-glycoprotein)	2.7757e+06	8.8756e+06	2.61807e+07	6.87518e+06	3.73274e+06	4.81856e+06	6.4986e+06	1.43069e+06	8.44592e+07	2.47503e+07	1.29956e+07	2.19099e+07	9.48491e+06	719196	1.63267e+07	1.0246e+07	1.11786e+07	5.99207e+06	2.939e+06	3.99465e+06	1.39239e+06	733818	7.45352e+06	1.5319e+06	3.57839e+06	5.96777e+06	2.20391e+06	2.33402e+06	2.49665e+06	5.76709e+06	4.89622e+07	3.38853e+06	1.99483e+06	9.1546e+06	8.66946e+06	781681	568168	903748	8.29997e+06	7.15751e+06	5.739e+06	1.37302e+06	4.12918e+06	9.93775e+06	4.20038e+06	7.97085e+06
[truncated: 66 more columns]
