# Supplementary material for: Cerebrospinal fluid proteome maps detect pathogen-specific host response patterns in meningitis
Source: eLife. 2021 Apr 6;10:e64159. doi: 10.7554/eLife.64159 (PMC8043743; doi:10.7554/eLife.64159)
Supplement: Supplementary file 3. — The cohort consists of longitudinal samples collected from six acute bacterial meningitis (ABM) patients (6 original samples used in this study and additional 14 longitudinal samples) and from four patients with subarachnoidal hemorrhage (SAH, 22 longitudinal samples). The data was manually curated to remove immunoglobulin variable chain proteins. [file elife-64159-supp3.xlsx]

## Sheet: Suppl Table 3.
	Supplementary File 3.
	Longitudinal samples: Original data from data-independent acquisition MS-runs (manually curated to remove immunoglobulin variable chain proteins).
	Uniprot	GO term	Protein	SAH - 189 A - SAH	SAH - 189 B - SAH	SAH - 189 C - SAH	SAH - 189 D - SAH	SAH - 191 A - SAH	SAH - 191 B - SAH	SAH - 191 C - SAH	SAH - 191 D - SAH	SAH - 191 E - SAH	SAH - 194 A - SAH	SAH - 194 B - SAH	SAH - 194 C - SAH	SAH - 194 D - SAH	SAH - 194 E - SAH	SAH - 194 F - SAH	SAH - 194 G - SAH	SAH - 195 A - SAH	SAH - 195 B - SAH	SAH - 195 C - SAH	SAH - 195 D - SAH	SAH - 195 E - SAH	ABM - 170 A - N. Meningitidis	ABM - 170 B - N. Meningitidis	ABM - 170 C - N. Meningitidis	ABM - 170 D - N. Meningitidis	ABM - 173 A - P. Aeruginosa	ABM - 173 B - P. Aeruginosa	ABM - 173 C - P. Aeruginosa	ABM - 173 D - P. Aeruginosa	ABM - 175 A - S. Pneumoniae	ABM - 175 B - S. Pneumoniae	ABM - 175 C - S. Pneumoniae	ABM - 175 D - S. Pneumoniae	ABM - 176 A - S. Pneumoniae T7	ABM - 176 B - S. Pneumoniae T7	ABM - 176 C - S. Pneumoniae T7	ABM - 177 - S. Pneumoniae T9	ABM - 177 B - S. Pneumoniae T9	ABM - 178 A - S. Pneumoniae	ABM - 178 B - S. Pneumoniae	ABM - 178 C - S. Pneumoniae
	Q86YZ3	HORN_HUMAN	Hornerin	0	0	0	0	0	0	0	0	0	0	0	0	0	0	0	0	0	0	0	0	0	0	0	0	0	0	0	0	0	0	0	0	0	0	0	0	73153.4	0	0	0	0
	Q99574	NEUS_HUMAN	Neuroserpin (Peptidase inhibitor 12) (PI-12) (Serpin I1)	0	0	0	0	0	0	0	0	0	0	0	0	0	0	0	0	0	0	0	0	0	0	0	0	0	0	0	0	0	0	0	0	0	0	0	0	110961	0	0	0	0
	Q92752	TENR_HUMAN	Tenascin-R (TN-R) (Janusin) (Restrictin)	0	0	0	0	0	0	0	0	0	0	0	0	0	0	0	0	0	0	0	0	0	0	0	0	0	0	0	0	0	0	0	131081	0	0	0	0	0	0	0	0	0
	Q99523	SORT_HUMAN	Sortilin (100 kDa NT receptor) (Glycoprotein 95) (Gp95) (Neurotensin receptor 3) (NT3) (NTR3)	0	0	0	0	0	0	0	0	0	0	0	0	0	0	0	0	0	0	0	0	0	0	0	0	0	0	0	0	0	0	0	0	136466	0	0	0	0	0	0	0	0
	Q13508	NAR3_HUMAN	Ecto-ADP-ribosyltransferase 3 (EC 2.4.2.31) (ADP-ribosyltransferase C2 and C3 toxin-like 3) (ARTC3) (Mono(ADP-ribosyl)transferase 3) (NAD(P)(+)--arginine ADP-ribosyltransferase 3)	0	0	0	0	0	0	0	0	0	0	0	0	0	0	0	0	0	0	0	0	0	0	0	0	0	0	0	0	0	0	0	0	0	0	0	0	139547	0	0	0	0
	P09668	CATH_HUMAN	Pro-cathepsin H [Cleaved into: Cathepsin H mini chain; Cathepsin H (EC 3.4.22.16); Cathepsin H heavy chain; Cathepsin H light chain]	0	0	0	0	0	0	0	0	0	0	0	0	0	0	0	0	0	0	0	0	0	0	0	0	0	0	0	0	0	0	0	0	0	0	0	0	0	0	0	157875	0
	Q03167	TGBR3_HUMAN	Transforming growth factor beta receptor type 3 (TGF-beta receptor type 3) (TGFR-3) (Betaglycan) (Transforming growth factor beta receptor III) (TGF-beta receptor type III)	0	0	0	0	0	0	0	0	0	0	0	0	0	0	0	0	0	0	0	0	0	0	0	0	0	0	0	163907	0	0	0	0	0	0	0	0	0	0	0	0	0
	P31948	STIP1_HUMAN	Stress-induced-phosphoprotein 1 (STI1) (Hsc70/Hsp90-organizing protein) (Hop) (Renal carcinoma antigen NY-REN-11) (Transformation-sensitive protein IEF SSP 3521)	0	0	0	0	0	0	0	0	0	0	0	0	0	0	0	0	0	0	0	0	0	0	0	0	0	0	164241	0	0	0	0	0	0	0	0	0	0	0	0	0	0
	Q9UNN8	EPCR_HUMAN	Endothelial protein C receptor (Activated protein C receptor) (APC receptor) (Endothelial cell protein C receptor) (CD antigen CD201)	0	0	0	0	0	0	0	0	0	0	0	0	0	0	0	0	0	0	0	0	0	0	0	0	0	0	0	0	0	0	0	0	0	0	0	0	209524	0	0	0	0
	P51858	HDGF_HUMAN	Hepatoma-derived growth factor (HDGF) (High mobility group protein 1-like 2) (HMG-1L2)	0	0	0	0	0	0	0	0	0	0	0	0	0	0	0	0	0	0	0	0	0	0	0	0	0	0	0	212768	0	0	0	0	0	0	0	0	0	0	0	0	0
	O75509	TNR21_HUMAN	Tumor necrosis factor receptor superfamily member 21 (Death receptor 6) (CD antigen CD358)	0	0	0	0	0	0	0	0	0	0	0	0	0	0	0	0	0	0	0	0	0	0	0	0	0	0	0	0	0	0	0	0	0	0	0	0	221375	0	0	0	0
	Q8NFT8	DNER_HUMAN	Delta and Notch-like epidermal growth factor-related receptor	0	0	0	0	0	0	0	0	0	0	0	0	0	0	0	0	0	0	0	0	0	0	0	0	0	0	0	0	0	0	0	0	0	0	0	0	0	0	0	0	226163
	Q8TCZ2	C99L2_HUMAN	CD99 antigen-like protein 2 (MIC2-like protein 1) (CD antigen CD99)	0	0	0	0	0	0	0	0	0	0	0	0	0	0	0	0	0	0	0	0	0	0	0	0	0	0	0	0	0	0	0	258178	0	0	0	0	0	0	0	0	0
	P55008	AIF1_HUMAN	Allograft inflammatory factor 1 (AIF-1) (Ionized calcium-binding adapter molecule 1) (Protein G1)	0	0	0	0	0	0	0	0	0	0	0	0	0	0	0	0	0	0	0	285956	0	0	0	0	0	0	0	0	0	0	0	0	0	0	0	0	0	0	0	0	0
	P49747	COMP_HUMAN	Cartilage oligomeric matrix protein (COMP) (Thrombospondin-5) (TSP5)	0	0	0	0	0	0	0	0	0	0	0	0	0	0	0	0	0	0	0	0	0	0	0	0	0	0	0	0	0	0	0	0	0	0	0	0	0	320750	0	0	0
	P04839	CY24B_HUMAN	Cytochrome b-245 heavy chain (EC 1.-.-.-) (CGD91-phox) (Cytochrome b(558) subunit beta) (Cytochrome b558 subunit beta) (Heme-binding membrane glycoprotein gp91phox) (NADPH oxidase 2) (Neutrophil cytochrome b 91 kDa polypeptide) (Superoxide-generating NADPH oxidase heavy chain subunit) (gp91-1) (gp91-phox) (p22 phagocyte B-cytochrome)	0	0	0	0	0	0	0	0	0	0	0	0	0	0	0	0	0	0	0	0	0	0	0	0	0	0	335348	0	0	0	0	0	0	0	0	0	0	0	0	0	0
	P39059	COFA1_HUMAN	Collagen alpha-1(XV) chain [Cleaved into: Restin (Endostatin-XV) (Related to endostatin) (Restin-I); Restin-2 (Restin-II); Restin-3 (Restin-III); Restin-4 (Restin-IV)]	0	0	0	0	0	0	0	0	0	0	0	0	0	0	0	0	0	0	0	0	0	0	342946	0	0	0	0	0	0	0	0	0	0	0	0	0	0	0	0	0	0
	P04070	PROC_HUMAN	Vitamin K-dependent protein C (EC 3.4.21.69) (Anticoagulant protein C) (Autoprothrombin IIA) (Blood coagulation factor XIV) [Cleaved into: Vitamin K-dependent protein C light chain; Vitamin K-dependent protein C heavy chain; Activation peptide]	0	0	0	0	0	0	0	0	0	0	0	0	0	0	0	0	0	0	0	0	0	0	0	0	0	0	0	0	0	0	0	0	0	0	0	0	0	0	0	0	344597
	P62993	GRB2_HUMAN	Growth factor receptor-bound protein 2 (Adapter protein GRB2) (Protein Ash) (SH2/SH3 adapter GRB2)	0	0	0	0	0	0	0	0	0	0	0	0	0	0	0	0	0	0	0	0	0	0	0	0	0	0	0	0	0	0	0	355458	0	0	0	0	0	0	0	0	0
	P12838	DEF4_HUMAN	Neutrophil defensin 4 (Defensin, alpha 4) (HNP-4) (HP-4)	0	0	0	0	0	0	0	0	0	0	0	0	0	0	0	0	0	0	0	0	0	0	0	0	0	0	391176	0	0	0	0	0	0	0	0	0	0	0	0	0	0
	Q01082	SPTB2_HUMAN	Spectrin beta chain, non-erythrocytic 1 (Beta-II spectrin) (Fodrin beta chain) (Spectrin, non-erythroid beta chain 1)	0	0	0	0	0	0	0	0	0	0	0	0	0	0	0	0	0	0	0	0	0	0	0	0	0	0	0	0	0	0	0	0	0	0	397503	0	0	0	0	0	0
	O95633	FSTL3_HUMAN	Follistatin-related protein 3 (Follistatin-like protein 3) (Follistatin-related gene protein)	0	0	0	0	0	0	0	0	0	0	0	0	0	0	0	0	0	0	0	0	0	0	0	0	0	0	406359	0	0	0	0	0	0	0	0	0	0	0	0	0	0
	Q9UPU3	SORC3_HUMAN	VPS10 domain-containing receptor SorCS3	0	0	0	0	0	0	0	0	0	0	0	0	0	0	0	0	0	0	0	0	0	0	0	0	0	0	0	0	0	0	0	0	0	0	0	411698	0	0	0	0	0
	Q92820	GGH_HUMAN	Gamma-glutamyl hydrolase (EC 3.4.19.9) (Conjugase) (GH) (Gamma-Glu-X carboxypeptidase)	0	0	0	0	0	0	0	0	0	0	0	0	0	0	0	0	0	0	0	0	0	0	0	0	0	0	0	0	0	449829	0	0	0	0	0	0	0	0	0	0	0
	P01833	PIGR_HUMAN	Polymeric immunoglobulin receptor (PIgR) (Poly-Ig receptor) (Hepatocellular carcinoma-associated protein TB6) [Cleaved into: Secretory component]	0	0	0	0	0	0	0	0	0	0	0	0	0	0	0	0	0	0	0	0	0	0	0	0	0	452130	0	0	0	0	0	0	0	0	0	0	0	0	0	0	0
	P20061	TCO1_HUMAN	Transcobalamin-1 (TC-1) (Haptocorrin) (HC) (Protein R) (Transcobalamin I) (TC I) (TCI)	0	0	0	0	0	0	0	0	0	0	0	0	0	0	0	0	0	0	0	0	0	0	0	0	0	0	0	0	0	0	0	0	0	0	453169	0	0	0	0	0	0
	P01213	PDYN_HUMAN	Proenkephalin-B (Beta-neoendorphin-dynorphin) (Preprodynorphin) [Cleaved into: Alpha-neoendorphin; Beta-neoendorphin; Big dynorphin (Big Dyn); Dynorphin A(1-17) (Dyn-A17) (Dynorphin A); Dynorphin A(1-13); Dynorphin A(1-8); Leu-enkephalin; Rimorphin (Dynorphin B) (Dyn-B) (Dynorphin B(1-13)); Leumorphin (Dynorphin B-29)]	0	0	0	0	0	0	0	0	0	0	0	0	0	0	0	0	0	0	0	0	0	0	0	0	0	0	0	0	0	0	0	0	453336	0	0	0	0	0	0	0	0
	P35442	TSP2_HUMAN	Thrombospondin-2	0	0	0	0	0	0	0	0	0	0	0	0	0	0	0	453901	0	0	0	0	0	0	0	0	0	0	0	0	0	0	0	0	0	0	0	0	0	0	0	0	0
	Q04695	K1C17_HUMAN	Keratin, type I cytoskeletal 17 (39.1) (Cytokeratin-17) (CK-17) (Keratin-17) (K17)	0	0	0	0	0	0	0	0	0	0	0	0	0	0	0	0	0	0	0	0	0	0	0	0	0	0	0	0	0	0	0	0	0	0	0	455256	0	0	0	0	0
	P49641	MA2A2_HUMAN	Alpha-mannosidase 2x (EC 3.2.1.114) (Alpha-mannosidase IIx) (Man IIx) (Mannosidase alpha class 2A member 2) (Mannosyl-oligosaccharide 1,3-1,6-alpha-mannosidase)	0	0	0	0	0	0	0	0	0	0	0	0	0	0	0	0	0	0	0	0	0	0	0	0	0	0	0	0	0	0	0	0	466495	0	0	0	0	0	0	0	0
	O94910	LPHN1_HUMAN	Adhesion G protein-coupled receptor L1 (Calcium-independent alpha-latrotoxin receptor 1) (CIRL-1) (Latrophilin-1) (Lectomedin-2)	0	0	0	0	0	0	0	0	0	0	0	0	0	0	0	0	0	0	0	0	0	0	0	0	0	0	0	0	0	0	0	0	312083	0	0	0	154563	0	0	0	0
	Q6MZW2	FSTL4_HUMAN	Follistatin-related protein 4 (Follistatin-like protein 4)	0	0	0	0	0	0	0	0	0	0	0	0	0	0	0	0	0	0	0	0	0	0	0	0	0	0	0	0	0	0	0	0	477073	0	0	0	0	0	0	0	0
	P14317	HCLS1_HUMAN	Hematopoietic lineage cell-specific protein (Hematopoietic cell-specific LYN substrate 1) (LckBP1) (p75)	0	0	0	0	0	0	0	0	0	0	0	0	0	0	0	0	0	0	0	0	0	0	0	0	0	0	487656	0	0	0	0	0	0	0	0	0	0	0	0	0	0
	Q6P4A8	PLBL1_HUMAN	Phospholipase B-like 1 (EC 3.1.1.-) (LAMA-like protein 1) (Lamina ancestor homolog 1) (Phospholipase B domain-containing protein 1) [Cleaved into: Phospholipase B-like 1 chain A; Phospholipase B-like 1 chain B; Phospholipase B-like 1 chain C]	0	0	0	0	0	0	0	0	0	0	0	0	0	0	0	0	0	0	0	0	0	0	0	0	0	0	0	0	0	0	0	0	0	0	488559	0	0	0	0	0	0
	O15031	PLXB2_HUMAN	Plexin-B2 (MM1)	0	0	0	0	0	0	0	0	0	0	0	0	0	0	0	0	0	0	0	0	0	0	0	0	0	0	0	0	0	0	0	0	167839	0	0	0	0	322288	0	0	0
	Q10588	BST1_HUMAN	ADP-ribosyl cyclase/cyclic ADP-ribose hydrolase 2 (EC 3.2.2.6) (ADP-ribosyl cyclase 2) (Bone marrow stromal antigen 1) (BST-1) (Cyclic ADP-ribose hydrolase 2) (cADPr hydrolase 2) (CD antigen CD157)	0	0	0	0	0	0	0	0	0	0	0	0	0	0	0	0	0	0	0	0	0	0	0	0	0	0	0	0	0	0	0	0	0	0	0	0	0	0	502241	0	0
	Q9BU40	CRDL1_HUMAN	Chordin-like protein 1 (Neuralin-1) (Neurogenesin-1) (Ventroptin)	0	0	0	0	0	0	0	0	0	0	0	0	0	0	0	0	0	0	0	0	0	0	0	0	0	0	0	0	0	0	0	0	508116	0	0	0	0	0	0	0	0
	Q9UMF0	ICAM5_HUMAN	Intercellular adhesion molecule 5 (ICAM-5) (Telencephalin)	0	0	0	0	0	0	0	0	0	0	0	0	0	0	0	0	0	0	0	0	0	0	0	0	0	0	0	0	0	0	0	0	508312	0	0	0	0	0	0	0	0
	Q8WZA1	PMGT1_HUMAN	Protein O-linked-mannose beta-1,2-N-acetylglucosaminyltransferase 1 (POMGnT1) (EC 2.4.1.-) (UDP-GlcNAc:alpha-D-mannoside beta-1,2-N-acetylglucosaminyltransferase I.2) (GnT I.2)	0	0	0	0	0	0	0	0	0	0	0	0	0	0	0	0	0	0	0	0	0	0	0	0	0	0	0	0	0	0	0	0	516801	0	0	0	0	0	0	0	0
	Q96BZ4	PLD4_HUMAN	Phospholipase D4 (PLD 4) (EC 3.1.4.4) (Choline phosphatase 4) (Phosphatidylcholine-hydrolyzing phospholipase D4)	0	0	0	0	0	0	0	0	0	0	0	0	0	0	0	0	0	0	0	0	0	0	0	0	0	0	0	0	0	0	0	0	530875	0	0	0	0	0	0	0	0
	Q6UW01	CBLN3_HUMAN	Cerebellin-3	0	0	0	0	0	0	0	0	0	0	0	0	0	0	0	0	0	0	0	0	0	0	0	0	0	0	0	0	0	0	0	0	543608	0	0	0	0	0	0	0	0
	P22304	IDS_HUMAN	Iduronate 2-sulfatase (EC 3.1.6.13) (Alpha-L-iduronate sulfate sulfatase) (Idursulfase) [Cleaved into: Iduronate 2-sulfatase 42 kDa chain; Iduronate 2-sulfatase 14 kDa chain]	0	0	0	0	0	0	0	0	0	0	0	0	0	0	0	0	0	0	0	0	0	0	0	0	0	0	0	0	0	0	0	0	562550	0	0	0	0	0	0	0	0
	P14621	ACYP2_HUMAN	Acylphosphatase-2 (EC 3.6.1.7) (Acylphosphatase, muscle type isozyme) (Acylphosphate phosphohydrolase 2)	0	0	0	0	0	0	0	0	0	0	0	0	0	0	0	0	0	0	0	0	0	0	0	0	0	0	0	0	0	0	0	0	0	0	572699	0	0	0	0	0	0
	Q9C0A0	CNTP4_HUMAN	Contactin-associated protein-like 4 (Cell recognition molecule Caspr4)	0	0	0	0	0	0	0	0	0	0	0	0	0	0	0	0	0	0	0	0	0	0	0	0	0	0	0	0	0	0	0	0	321960	0	0	0	0	260902	0	0	0
	P11362	FGFR1_HUMAN	Fibroblast growth factor receptor 1 (FGFR-1) (EC 2.7.10.1) (Basic fibroblast growth factor receptor 1) (BFGFR) (bFGF-R-1) (Fms-like tyrosine kinase 2) (FLT-2) (N-sam) (Proto-oncogene c-Fgr) (CD antigen CD331)	0	0	0	0	0	0	0	0	0	0	0	0	0	0	0	0	0	0	0	0	0	0	0	0	0	0	0	0	0	0	0	0	596991	0	0	0	0	0	0	0	0
	O43556	SGCE_HUMAN	Epsilon-sarcoglycan (Epsilon-SG)	0	0	0	0	0	0	0	0	0	0	0	0	0	0	0	0	0	0	0	0	0	0	0	0	0	0	0	0	0	0	0	0	602453	0	0	0	0	0	0	0	0
	Q8IV08	PLD3_HUMAN	Phospholipase D3 (PLD 3) (EC 3.1.4.4) (Choline phosphatase 3) (HindIII K4L homolog) (Hu-K4) (Phosphatidylcholine-hydrolyzing phospholipase D3)	0	0	0	0	0	0	0	0	0	0	0	0	0	0	0	0	0	0	0	0	0	0	0	0	0	0	0	0	0	0	0	0	432485	0	0	0	0	0	0	0	183274
	P25788	PSA3_HUMAN	Proteasome subunit alpha type-3 (EC 3.4.25.1) (Macropain subunit C8) (Multicatalytic endopeptidase complex subunit C8) (Proteasome component C8)	0	0	0	0	0	0	0	0	0	0	0	0	0	0	0	0	0	0	0	0	0	0	0	0	0	0	0	0	0	0	0	0	0	0	0	0	0	619771	0	0	0
	Q96KG7	MEG10_HUMAN	Multiple epidermal growth factor-like domains protein 10 (Multiple EGF-like domains protein 10)	0	0	0	0	0	0	0	0	0	0	0	0	0	0	0	0	0	0	0	0	0	0	0	0	0	0	0	0	0	0	0	0	459389	0	162124	0	0	0	0	0	0
	Q86UN3	R4RL2_HUMAN	Reticulon-4 receptor-like 2 (Nogo receptor-like 3) (Nogo-66 receptor homolog 1) (Nogo-66 receptor-related protein 2) (NgR2)	0	0	0	0	0	0	0	0	0	0	0	0	0	0	0	0	0	0	0	0	0	0	0	0	0	0	0	0	0	0	0	0	623127	0	0	0	0	0	0	0	0
	P48058	GRIA4_HUMAN	Glutamate receptor 4 (GluR-4) (GluR4) (AMPA-selective glutamate receptor 4) (GluR-D) (Glutamate receptor ionotropic, AMPA 4) (GluA4)	0	0	0	0	0	0	0	0	0	0	0	0	0	0	0	0	0	0	0	0	0	0	0	0	0	0	0	0	0	0	0	0	634609	0	0	0	0	0	0	0	0
	P00568	KAD1_HUMAN	Adenylate kinase isoenzyme 1 (AK 1) (EC 2.7.4.3) (EC 2.7.4.6) (ATP-AMP transphosphorylase 1) (ATP:AMP phosphotransferase) (Adenylate monophosphate kinase) (Myokinase)	0	0	0	0	0	0	0	0	0	0	0	0	0	0	0	0	0	0	0	0	0	0	0	0	0	0	0	0	0	0	636199	0	0	0	0	0	0	0	0	0	0
	P23297	S10A1_HUMAN	Protein S100-A1 (S-100 protein alpha chain) (S-100 protein subunit alpha) (S100 calcium-binding protein A1)	0	0	0	0	0	0	0	0	0	0	0	0	0	0	0	0	0	0	0	0	0	0	0	0	0	0	0	0	0	0	0	0	0	0	0	649693	0	0	0	0	0
	Q9ULF5	S39AA_HUMAN	Zinc transporter ZIP10 (Solute carrier family 39 member 10) (Zrt- and Irt-like protein 10) (ZIP-10)	0	0	0	0	0	0	0	0	0	0	0	0	0	0	0	0	0	0	0	0	0	0	0	0	0	0	0	0	0	0	0	0	336955	0	327680	0	0	0	0	0	0
	Q9Y646	CBPQ_HUMAN	Carboxypeptidase Q (EC 3.4.17.-) (Lysosomal dipeptidase) (Plasma glutamate carboxypeptidase)	0	0	0	0	0	0	0	0	0	0	0	0	0	0	0	0	0	0	0	0	0	0	0	0	0	0	0	0	0	0	0	0	669819	0	0	0	0	0	0	0	0
	P19835	CEL_HUMAN	Bile salt-activated lipase (BAL) (EC 3.1.1.13) (EC 3.1.1.3) (Bile salt-stimulated lipase) (BSSL) (Bucelipase) (Carboxyl ester lipase) (Cholesterol esterase) (Pancreatic lysophospholipase) (Sterol esterase)	0	0	0	0	0	0	0	0	0	0	0	0	0	0	0	0	0	0	0	0	0	0	0	0	0	0	0	0	0	0	0	675130	0	0	0	0	0	0	0	0	0
	Q8N2S1	LTBP4_HUMAN	Latent-transforming growth factor beta-binding protein 4 (LTBP-4)	0	0	0	0	0	0	0	0	0	0	0	0	0	0	0	0	0	0	0	0	0	0	0	0	0	0	0	0	0	0	0	0	675568	0	0	0	0	0	0	0	0
	O00451	GFRA2_HUMAN	GDNF family receptor alpha-2 (GDNF receptor alpha-2) (GDNFR-alpha-2) (GFR-alpha-2) (GDNF receptor beta) (GDNFR-beta) (Neurturin receptor alpha) (NRTNR-alpha) (NTNR-alpha) (RET ligand 2) (TGF-beta-related neurotrophic factor receptor 2)	0	0	0	0	0	0	0	0	0	0	0	0	0	0	0	0	0	0	0	0	0	0	0	0	0	0	0	0	0	0	0	0	676400	0	0	0	0	0	0	0	0
	P28072	PSB6_HUMAN	Proteasome subunit beta type-6 (EC 3.4.25.1) (Macropain delta chain) (Multicatalytic endopeptidase complex delta chain) (Proteasome delta chain) (Proteasome subunit Y)	0	0	0	0	0	0	0	0	0	0	0	0	0	0	0	0	0	0	0	421722	254929	0	0	0	0	0	0	0	0	0	0	0	0	0	0	0	0	0	0	0	0
	Q93091	RNAS6_HUMAN	Ribonuclease K6 (RNase K6) (EC 3.1.27.-)	0	0	0	0	0	0	0	0	0	0	0	0	0	0	0	0	0	0	0	0	0	0	0	0	0	0	0	0	0	0	0	0	0	0	0	0	679013	0	0	0	0
	O00602	FCN1_HUMAN	Ficolin-1 (Collagen/fibrinogen domain-containing protein 1) (Ficolin-A) (Ficolin-alpha) (M-ficolin)	0	0	0	0	0	0	0	0	0	0	0	0	0	0	0	0	0	0	0	0	0	0	0	0	0	0	0	0	0	0	0	0	0	0	0	0	0	0	706659	0	0
	Q9UHL4	DPP2_HUMAN	Dipeptidyl peptidase 2 (EC 3.4.14.2) (Dipeptidyl aminopeptidase II) (Dipeptidyl peptidase 7) (Dipeptidyl peptidase II) (DPP II) (Quiescent cell proline dipeptidase)	0	0	0	0	0	0	0	0	0	0	0	0	0	0	0	0	0	0	0	0	0	148020	0	144404	0	0	0	0	0	0	0	0	0	0	0	0	0	0	199628	103799	162185
	A6NLU5	VTM2B_HUMAN	V-set and transmembrane domain-containing protein 2B	0	0	0	0	0	0	0	0	0	0	0	0	0	0	0	0	0	0	0	0	0	0	0	0	0	0	0	0	0	0	0	0	770027	0	0	0	0	0	0	0	0
	O60279	SUSD5_HUMAN	Sushi domain-containing protein 5	0	0	0	0	0	0	0	0	0	0	0	0	0	0	0	0	0	0	0	0	0	0	0	0	0	0	0	0	0	0	0	779880	0	0	0	0	0	0	0	0	0
	P61604	CH10_HUMAN	10 kDa heat shock protein, mitochondrial (Hsp10) (10 kDa chaperonin) (Chaperonin 10) (CPN10) (Early-pregnancy factor) (EPF)	0	0	0	0	0	0	0	0	0	0	0	0	0	0	0	0	0	0	0	781893	0	0	0	0	0	0	0	0	0	0	0	0	0	0	0	0	0	0	0	0	0
	P40189	IL6RB_HUMAN	Interleukin-6 receptor subunit beta (IL-6 receptor subunit beta) (IL-6R subunit beta) (IL-6R-beta) (IL-6RB) (CDw130) (Interleukin-6 signal transducer) (Membrane glycoprotein 130) (gp130) (Oncostatin-M receptor subunit alpha) (CD antigen CD130)	0	0	0	0	0	0	0	0	0	0	0	0	0	0	0	0	0	0	0	0	0	0	0	0	0	0	0	0	0	0	0	0	785856	0	0	0	0	0	0	0	0
	P16152	CBR1_HUMAN	Carbonyl reductase [NADPH] 1 (EC 1.1.1.184) (15-hydroxyprostaglandin dehydrogenase [NADP(+)]) (EC 1.1.1.197) (NADPH-dependent carbonyl reductase 1) (Prostaglandin 9-ketoreductase) (Prostaglandin-E(2) 9-reductase) (EC 1.1.1.189) (Short chain dehydrogenase/reductase family 21C member 1)	0	0	0	0	0	0	0	0	0	0	0	0	0	0	0	0	0	0	0	0	0	0	0	0	0	0	0	0	0	0	0	0	0	0	785923	0	0	0	0	0	0
	P26572	MGAT1_HUMAN	Alpha-1,3-mannosyl-glycoprotein 2-beta-N-acetylglucosaminyltransferase (EC 2.4.1.101) (N-glycosyl-oligosaccharide-glycoprotein N-acetylglucosaminyltransferase I) (GNT-I) (GlcNAc-T I)	0	0	0	0	0	0	0	0	0	0	0	0	0	0	0	0	0	0	0	0	0	0	0	0	0	0	0	398596	0	0	0	0	410966	0	0	0	0	0	0	0	0
	Q9UJU6	DBNL_HUMAN	Drebrin-like protein (Cervical SH3P7) (Cervical mucin-associated protein) (Drebrin-F) (HPK1-interacting protein of 55 kDa) (HIP-55) (SH3 domain-containing protein 7)	0	0	0	0	0	0	0	0	0	0	0	0	0	0	0	0	0	0	0	0	0	0	0	0	0	0	0	0	0	0	0	0	0	0	0	0	0	813368	0	0	0
	Q9ULB1	NRX1A_HUMAN	Neurexin-1 (Neurexin I-alpha) (Neurexin-1-alpha)	0	0	0	0	0	0	0	0	0	0	0	0	0	0	0	0	0	0	0	0	0	0	0	0	0	0	0	0	0	0	0	0	816128	0	0	0	0	0	0	0	0
	Q24JP5	T132A_HUMAN	Transmembrane protein 132A (HSPA5-binding protein 1)	0	0	0	0	0	0	0	0	0	0	0	0	0	0	0	0	0	0	0	0	0	0	0	0	0	0	0	0	0	0	0	0	821785	0	0	0	0	0	0	0	0
	Q02487	DSC2_HUMAN	Desmocollin-2 (Cadherin family member 2) (Desmocollin-3) (Desmosomal glycoprotein II) (Desmosomal glycoprotein III)	0	0	0	0	0	0	0	0	0	0	0	0	0	0	0	0	0	0	0	0	0	0	0	0	0	0	0	0	459966	0	0	0	0	0	0	365948	0	0	0	0	0
	Q96CX2	KCD12_HUMAN	BTB/POZ domain-containing protein KCTD12 (Pfetin) (Predominantly fetal expressed T1 domain)	0	0	0	0	0	0	0	0	0	0	0	0	0	0	0	0	0	0	0	844914	0	0	0	0	0	0	0	0	0	0	0	0	0	0	0	0	0	0	0	0	0
	Q92932	PTPR2_HUMAN	Receptor-type tyrosine-protein phosphatase N2 (R-PTP-N2) (EC 3.1.3.48) (Islet cell autoantigen-related protein) (IAR) (ICAAR) (Phogrin)	0	0	0	0	0	0	0	0	0	0	0	0	0	0	0	0	0	0	0	0	0	0	0	0	0	0	0	0	0	0	0	0	848430	0	0	0	0	0	0	0	0
	P20618	PSB1_HUMAN	Proteasome subunit beta type-1 (EC 3.4.25.1) (Macropain subunit C5) (Multicatalytic endopeptidase complex subunit C5) (Proteasome component C5) (Proteasome gamma chain)	0	0	0	0	0	0	0	0	0	0	0	0	0	0	0	0	0	0	0	861997	0	0	0	0	0	0	0	0	0	0	0	0	0	0	0	0	0	0	0	0	0
	Q9P0K1	ADA22_HUMAN	Disintegrin and metalloproteinase domain-containing protein 22 (ADAM 22) (Metalloproteinase-disintegrin ADAM22-3) (Metalloproteinase-like, disintegrin-like, and cysteine-rich protein 2)	0	0	0	0	0	0	0	0	0	0	0	0	0	0	0	0	0	0	0	0	0	0	0	0	0	0	0	0	0	0	0	0	872012	0	0	0	0	0	0	0	0
	Q13813	SPTN1_HUMAN	Spectrin alpha chain, non-erythrocytic 1 (Alpha-II spectrin) (Fodrin alpha chain) (Spectrin, non-erythroid alpha subunit)	0	0	0	0	0	0	0	0	0	0	0	0	0	0	0	0	0	0	0	0	0	0	0	0	0	0	0	0	0	0	0	186082	0	0	528588	193626	0	0	0	0	0
	P32004	L1CAM_HUMAN	Neural cell adhesion molecule L1 (N-CAM-L1) (NCAM-L1) (CD antigen CD171)	0	0	0	0	0	0	0	0	0	0	0	0	0	0	0	0	0	0	0	0	0	0	0	0	0	0	0	0	0	0	0	0	308677	0	212228	0	0	398008	0	0	0
	P08575	PTPRC_HUMAN	Receptor-type tyrosine-protein phosphatase C (EC 3.1.3.48) (Leukocyte common antigen) (L-CA) (T200) (CD antigen CD45)	0	0	0	0	0	0	0	0	0	0	0	0	0	0	0	0	0	0	0	0	0	0	0	0	0	0	447295	505298	0	0	0	0	0	0	0	0	0	0	0	0	0
	Q5FWE3	PRRT3_HUMAN	Proline-rich transmembrane protein 3	0	0	0	0	0	0	0	0	0	0	0	0	0	0	0	0	0	0	0	0	0	0	0	0	0	0	0	0	0	0	0	0	958849	0	0	0	0	0	0	0	0
	P61970	NTF2_HUMAN	Nuclear transport factor 2 (NTF-2) (Placental protein 15) (PP15)	0	0	0	0	0	0	0	0	0	0	0	0	0	0	0	0	0	0	0	0	0	0	0	0	0	0	0	0	0	0	0	0	0	0	972352	0	0	0	0	0	0
	P04350	TBB4A_HUMAN	Tubulin beta-4A chain (Tubulin 5 beta) (Tubulin beta-4 chain)	0	0	0	0	0	0	0	0	0	0	0	0	0	0	0	0	0	0	0	0	0	0	0	0	0	0	0	0	0	0	532721	0	0	0	0	0	0	0	447315	0	0
	Q14847	LASP1_HUMAN	LIM and SH3 domain protein 1 (LASP-1) (Metastatic lymph node gene 50 protein) (MLN 50)	0	0	0	0	0	0	0	0	0	0	0	0	0	0	0	0	0	0	0	0	0	0	0	0	0	0	501388	498467	0	0	0	0	0	0	0	0	0	0	0	0	0
	P06865	HEXA_HUMAN	Beta-hexosaminidase subunit alpha (EC 3.2.1.52) (Beta-N-acetylhexosaminidase subunit alpha) (Hexosaminidase subunit A) (N-acetyl-beta-glucosaminidase subunit alpha)	0	0	0	0	0	0	0	0	0	0	0	0	0	0	0	0	0	0	0	0	0	0	0	0	0	0	0	0	0	0	0	393501	0	0	0	0	163764	0	0	164183	283966
	O60241	BAI2_HUMAN	Adhesion G protein-coupled receptor B2 (Brain-specific angiogenesis inhibitor 2)	0	0	0	0	0	0	0	0	0	0	0	0	0	0	0	0	0	0	0	0	0	0	0	0	0	0	0	0	0	0	0	358463	496539	0	0	0	154623	0	0	0	0
	Q9Y4C0	NRX3A_HUMAN	Neurexin-3 (Neurexin III-alpha) (Neurexin-3-alpha)	0	0	0	0	0	0	0	0	0	0	0	0	0	0	0	0	0	0	0	0	0	0	0	0	0	0	0	0	0	0	0	0	906065	0	0	0	132081	0	0	0	0
	P28070	PSB4_HUMAN	Proteasome subunit beta type-4 (EC 3.4.25.1) (26 kDa prosomal protein) (HsBPROS26) (PROS-26) (Macropain beta chain) (Multicatalytic endopeptidase complex beta chain) (Proteasome beta chain) (Proteasome chain 3) (HsN3)	0	0	0	0	0	0	0	0	0	0	0	0	0	0	0	0	0	0	0	253331	0	0	0	0	0	0	0	0	0	0	0	0	0	0	0	0	0	796029	0	0	0
	P81605	DCD_HUMAN	Dermcidin (EC 3.4.-.-) (Preproteolysin) [Cleaved into: Survival-promoting peptide; DCD-1]	0	0	0	0	0	0	0	0	0	0	0	0	0	0	0	0	0	0	0	0	0	0	0	0	0	0	0	0	0	0	0	0	0	0	0	0	1.06053e+06	0	0	0	0
	Q16849	PTPRN_HUMAN	Receptor-type tyrosine-protein phosphatase-like N (R-PTP-N) (Islet cell antigen 512) (ICA 512) (Islet cell autoantigen 3) (PTP IA-2)	0	0	0	0	0	0	0	0	0	0	0	0	0	0	0	0	0	0	0	0	0	0	0	0	0	0	0	0	0	0	0	0	1.07257e+06	0	0	0	0	0	0	0	0
	P05121	PAI1_HUMAN	Plasminogen activator inhibitor 1 (PAI) (PAI-1) (Endothelial plasminogen activator inhibitor) (Serpin E1)	0	0	0	0	0	0	0	0	0	0	0	0	0	0	0	0	0	0	0	0	0	0	0	0	0	301428	0	0	0	534978	0	0	0	265820	0	0	0	0	0	0	0
	P04179	SODM_HUMAN	Superoxide dismutase [Mn], mitochondrial (EC 1.15.1.1)	0	0	0	448901	0	0	0	0	0	0	0	0	0	0	0	0	0	0	0	656766	0	0	0	0	0	0	0	0	0	0	0	0	0	0	0	0	0	0	0	0	0
	Q9NZC2	TREM2_HUMAN	Triggering receptor expressed on myeloid cells 2 (TREM-2) (Triggering receptor expressed on monocytes 2)	0	0	0	0	0	0	0	0	0	0	0	0	0	0	0	0	0	0	0	0	0	0	0	0	0	0	0	0	0	0	0	0	415057	0	0	0	0	696681	0	0	0
	P78509	RELN_HUMAN	Reelin (EC 3.4.21.-)	0	0	0	0	0	0	0	0	0	0	0	0	0	0	0	0	0	0	0	0	0	0	0	0	0	0	0	0	0	0	0	0	1.00331e+06	0	0	0	115807	0	0	0	0
	P11047	LAMC1_HUMAN	Laminin subunit gamma-1 (Laminin B2 chain) (Laminin-1 subunit gamma) (Laminin-10 subunit gamma) (Laminin-11 subunit gamma) (Laminin-2 subunit gamma) (Laminin-3 subunit gamma) (Laminin-4 subunit gamma) (Laminin-6 subunit gamma) (Laminin-7 subunit gamma) (Laminin-8 subunit gamma) (Laminin-9 subunit gamma) (S-laminin subunit gamma) (S-LAM gamma)	0	0	0	0	0	0	0	0	0	0	0	0	0	0	0	0	0	0	0	0	0	0	0	0	0	0	0	0	0	0	0	0	373954	0	0	0	131671	617194	0	0	0
	Q9H4G4	GAPR1_HUMAN	Golgi-associated plant pathogenesis-related protein 1 (GAPR-1) (Golgi-associated PR-1 protein) (Glioma pathogenesis-related protein 2) (GliPR 2)	0	0	0	0	0	0	0	0	0	0	0	0	0	0	0	0	0	0	0	0	0	0	0	0	0	0	422985	479961	0	0	0	259005	0	0	0	0	0	0	0	0	0
	P02144	MYG_HUMAN	Myoglobin	0	0	0	0	0	0	0	0	0	0	0	0	0	0	0	0	0	0	0	0	0	0	0	0	0	0	0	0	0	0	0	0	0	0	0	0	540841	650165	0	0	0
	P10321	1C07_HUMAN	HLA class I histocompatibility antigen, Cw-7 alpha chain (MHC class I antigen Cw*7)	0	0	0	0	0	0	0	0	0	0	0	0	0	0	0	0	0	0	0	0	0	0	0	0	0	0	0	0	0	0	0	0	0	0	0	0	0	1.19929e+06	0	0	0
	Q08431	MFGM_HUMAN	Lactadherin (Breast epithelial antigen BA46) (HMFG) (MFGM) (Milk fat globule-EGF factor 8) (MFG-E8) (SED1) [Cleaved into: Lactadherin short form; Medin]	0	0	0	0	0	0	0	0	0	0	0	0	0	0	0	0	0	0	0	0	0	0	0	0	0	0	0	0	0	0	0	0	0	0	0	0	0	1.20399e+06	0	0	0
	P55083	MFAP4_HUMAN	Microfibril-associated glycoprotein 4	0	0	0	0	0	0	0	0	0	0	0	0	0	0	0	0	0	0	0	0	0	0	0	0	0	0	0	0	0	0	0	0	1.20719e+06	0	0	0	0	0	0	0	0
	P51888	PRELP_HUMAN	Prolargin (Proline-arginine-rich end leucine-rich repeat protein)	0	0	0	0	0	0	0	0	0	0	0	0	0	0	0	0	0	0	0	0	0	0	0	0	0	0	0	0	0	0	0	0	339348	0	0	0	0	898714	0	0	0
	Q9UL46	PSME2_HUMAN	Proteasome activator complex subunit 2 (11S regulator complex subunit beta) (REG-beta) (Activator of multicatalytic protease subunit 2) (Proteasome activator 28 subunit beta) (PA28b) (PA28beta)	0	0	0	0	0	0	0	0	0	0	0	0	0	0	0	0	0	0	0	0	0	0	0	0	0	0	206964	0	0	0	0	0	0	0	0	0	0	1.10999e+06	0	0	0
	P23470	PTPRG_HUMAN	Receptor-type tyrosine-protein phosphatase gamma (Protein-tyrosine phosphatase gamma) (R-PTP-gamma) (EC 3.1.3.48)	0	0	0	0	0	0	0	0	0	0	0	0	0	0	0	0	0	0	0	0	0	0	0	0	0	0	0	0	0	0	0	387116	939116	0	0	0	0	0	0	0	0
	Q53EL9	SEZ6_HUMAN	Seizure protein 6 homolog (SEZ-6) (hSEZ-6)	0	0	0	0	0	0	0	0	0	0	0	0	0	0	0	0	0	0	0	0	0	0	0	0	0	0	0	0	0	0	0	0	1.25035e+06	0	0	0	202301	0	0	0	0
	O15511	ARPC5_HUMAN	Actin-related protein 2/3 complex subunit 5 (Arp2/3 complex 16 kDa subunit) (p16-ARC)	0	0	0	0	0	0	0	0	0	0	0	0	0	0	0	0	0	0	0	0	0	0	0	0	0	0	0	1.46038e+06	0	0	0	0	0	0	0	0	0	0	0	0	0
	P11226	MBL2_HUMAN	Mannose-binding protein C (MBP-C) (Collectin-1) (MBP1) (Mannan-binding protein) (Mannose-binding lectin)	0	0	0	0	0	0	0	0	0	0	0	0	0	0	0	0	0	0	0	0	0	0	0	0	0	0	0	0	0	0	0	0	0	673672	799684	0	0	0	0	0	0
	P29350	PTN6_HUMAN	Tyrosine-protein phosphatase non-receptor type 6 (EC 3.1.3.48) (Hematopoietic cell protein-tyrosine phosphatase) (Protein-tyrosine phosphatase 1C) (PTP-1C) (Protein-tyrosine phosphatase SHP-1) (SH-PTP1)	0	0	0	0	0	0	0	0	0	0	0	0	0	0	0	0	0	0	0	0	0	0	0	0	0	0	0	0	0	0	0	0	1.51543e+06	0	0	0	0	0	0	0	0
	Q96PX8	SLIK1_HUMAN	SLIT and NTRK-like protein 1 (Leucine-rich repeat-containing protein 12)	0	0	0	0	0	0	0	0	0	0	0	0	0	0	0	0	0	0	0	0	0	0	0	0	0	0	0	0	0	0	0	0	1.22748e+06	0	0	0	288296	0	0	0	0
	Q9H4F8	SMOC1_HUMAN	SPARC-related modular calcium-binding protein 1 (Secreted modular calcium-binding protein 1) (SMOC-1)	0	0	0	0	0	0	0	0	0	0	0	0	0	0	0	0	0	0	0	0	0	0	0	0	0	0	0	123791	136566	0	0	515129	545363	0	0	0	0	0	0	0	208057
	Q9UM07	PADI4_HUMAN	Protein-arginine deiminase type-4 (EC 3.5.3.15) (HL-60 PAD) (Peptidylarginine deiminase IV) (Protein-arginine deiminase type IV)	0	0	0	0	0	0	0	0	0	0	0	0	0	0	0	0	0	0	0	0	0	0	0	0	0	0	641347	0	0	0	0	0	0	0	0	0	0	919994	0	0	0
	P26927	HGFL_HUMAN	Hepatocyte growth factor-like protein (Macrophage stimulatory protein) (Macrophage-stimulating protein) (MSP) [Cleaved into: Hepatocyte growth factor-like protein alpha chain; Hepatocyte growth factor-like protein beta chain]	0	0	0	0	0	0	0	0	0	0	0	0	0	0	0	0	0	0	0	0	0	0	0	0	0	0	0	457722	0	0	0	0	0	0	0	0	0	1.11241e+06	0	0	0
	P29762	RABP1_HUMAN	Cellular retinoic acid-binding protein 1 (Cellular retinoic acid-binding protein I) (CRABP-I)	0	0	0	0	0	0	0	0	0	0	0	0	0	0	0	0	0	0	0	0	0	0	0	0	0	0	0	0	0	1.60535e+06	0	0	0	0	0	0	0	0	0	0	0
	Q9NPD7	NRN1_HUMAN	Neuritin	0	0	0	0	0	0	0	0	0	0	0	0	0	0	0	0	0	0	0	0	0	0	0	0	0	0	0	0	0	0	0	0	944085	0	470904	0	200885	0	0	0	0
	P19878	NCF2_HUMAN	Neutrophil cytosol factor 2 (NCF-2) (67 kDa neutrophil oxidase factor) (NADPH oxidase activator 2) (Neutrophil NADPH oxidase factor 2) (p67-phox)	0	0	0	0	0	0	0	0	0	0	0	0	0	0	0	0	0	0	0	0	0	0	0	0	0	0	290112	0	0	0	0	0	0	0	0	0	0	1.35178e+06	0	0	0
	O00241	SIRB1_HUMAN	Signal-regulatory protein beta-1 (SIRP-beta-1) (CD172 antigen-like family member B) (CD antigen CD172b)	0	0	0	0	0	0	0	0	0	0	0	0	0	0	0	0	0	0	0	0	0	0	0	0	0	0	0	0	0	0	0	0	1.66083e+06	0	0	0	0	0	0	0	0
	P30048	PRDX3_HUMAN	Thioredoxin-dependent peroxide reductase, mitochondrial (EC 1.11.1.15) (Antioxidant protein 1) (AOP-1) (HBC189) (Peroxiredoxin III) (Prx-III) (Peroxiredoxin-3) (Protein MER5 homolog)	0	0	0	0	0	0	0	0	0	0	0	0	0	0	0	0	0	0	0	0	0	0	0	0	0	0	0	913878	0	0	0	0	435995	0	346289	0	0	0	0	0	0
	Q96C19	EFHD2_HUMAN	EF-hand domain-containing protein D2 (Swiprosin-1)	0	0	0	0	0	0	0	0	0	0	0	0	0	0	0	0	0	0	0	0	0	0	0	0	0	0	0	0	0	0	0	0	0	0	0	0	0	1.74422e+06	0	0	0
	P23468	PTPRD_HUMAN	Receptor-type tyrosine-protein phosphatase delta (Protein-tyrosine phosphatase delta) (R-PTP-delta) (EC 3.1.3.48)	0	0	0	0	0	0	0	0	0	0	0	0	0	0	0	0	0	0	0	0	0	0	0	0	0	0	518883	0	0	0	0	0	399371	0	0	0	213180	633734	0	0	0
	P09936	UCHL1_HUMAN	Ubiquitin carboxyl-terminal hydrolase isozyme L1 (UCH-L1) (EC 3.4.19.12) (EC 6.-.-.-) (Neuron cytoplasmic protein 9.5) (PGP 9.5) (PGP9.5) (Ubiquitin thioesterase L1)	0	0	0	0	0	0	0	0	0	0	0	0	0	0	0	0	0	0	0	0	0	0	0	0	0	0	0	0	0	0	0	0	0	0	1.36963e+06	0	0	0	410560	0	0
	Q9NQX5	NPDC1_HUMAN	Neural proliferation differentiation and control protein 1 (NPDC-1)	0	0	0	0	0	0	0	0	0	0	0	0	0	0	0	0	0	0	0	0	0	0	0	0	0	0	0	0	0	0	0	452868	983766	0	0	378812	0	0	0	0	0
	O14786	NRP1_HUMAN	Neuropilin-1 (Vascular endothelial cell growth factor 165 receptor) (CD antigen CD304)	0	0	0	0	0	0	0	0	0	0	0	0	0	0	0	0	0	0	0	220525	0	0	0	0	0	0	0	0	341809	0	0	235999	197242	0	0	218128	0	587626	0	23502	0
	P08758	ANXA5_HUMAN	Annexin A5 (Anchorin CII) (Annexin V) (Annexin-5) (Calphobindin I) (CBP-I) (Endonexin II) (Lipocortin V) (Placental anticoagulant protein 4) (PP4) (Placental anticoagulant protein I) (PAP-I) (Thromboplastin inhibitor) (Vascular anticoagulant-alpha) (VAC-alpha)	0	0	0	0	0	0	0	0	0	0	0	0	0	0	0	0	0	0	0	0	0	0	0	0	0	0	209483	0	468681	0	0	321956	0	0	0	0	0	645921	200494	0	0
	Q96KP4	CNDP2_HUMAN	Cytosolic non-specific dipeptidase (EC 3.4.13.18) (CNDP dipeptidase 2) (Carnosine dipeptidase II) (Epididymis secretory protein Li 13) (Glutamate carboxypeptidase-like protein 1) (Peptidase A)	0	0	0	0	0	0	0	0	0	0	0	0	0	0	0	0	0	0	0	441039	0	0	0	0	0	0	0	0	0	0	0	0	0	0	1.40598e+06	0	0	0	0	0	0
	P55072	TERA_HUMAN	Transitional endoplasmic reticulum ATPase (TER ATPase) (EC 3.6.4.6) (15S Mg(2+)-ATPase p97 subunit) (Valosin-containing protein) (VCP)	0	0	0	0	0	0	0	0	0	0	0	0	0	0	0	0	0	0	0	0	0	0	0	0	0	0	0	0	0	0	0	0	0	0	614522	0	0	1.26681e+06	0	0	0
	P04278	SHBG_HUMAN	Sex hormone-binding globulin (SHBG) (Sex steroid-binding protein) (SBP) (Testis-specific androgen-binding protein) (ABP) (Testosterone-estradiol-binding globulin) (TeBG) (Testosterone-estrogen-binding globulin)	0	0	0	0	0	0	0	0	0	0	0	0	0	0	0	0	0	0	0	0	0	0	0	0	0	0	0	0	0	0	0	0	0	0	0	0	0	1.88909e+06	0	0	0
	P30520	PURA2_HUMAN	Adenylosuccinate synthetase isozyme 2 (AMPSase 2) (AdSS 2) (EC 6.3.4.4) (Adenylosuccinate synthetase, acidic isozyme) (Adenylosuccinate synthetase, liver isozyme) (L-type adenylosuccinate synthetase) (IMP--aspartate ligase 2)	0	0	0	0	0	0	0	0	0	0	0	0	0	0	0	0	0	0	0	0	0	0	0	0	0	0	414144	351554	0	0	0	0	0	0	0	0	0	1.13854e+06	0	0	0
	P16157	ANK1_HUMAN	Ankyrin-1 (ANK-1) (Ankyrin-R) (Erythrocyte ankyrin)	0	0	0	553745	0	0	0	0	0	0	0	0	656377	714301	0	0	0	0	0	0	0	0	0	0	0	0	0	0	0	0	0	0	0	0	0	0	0	0	0	0	0
	P08779	K1C16_HUMAN	Keratin, type I cytoskeletal 16 (Cytokeratin-16) (CK-16) (Keratin-16) (K16)	0	0	0	0	0	0	0	0	0	0	0	0	0	0	0	0	0	0	0	0	0	0	0	0	433866	0	0	0	0	0	0	0	0	0	0	1.51793e+06	0	0	0	0	0
	Q9NUQ9	FA49B_HUMAN	Protein FAM49B (L1)	0	0	0	0	0	0	0	0	0	0	0	0	0	0	0	0	0	0	0	0	0	0	0	0	0	0	0	0	0	0	0	0	0	0	0	0	0	1.96313e+06	0	0	0
	Q9NZK5	CECR1_HUMAN	Adenosine deaminase CECR1 (EC 3.5.4.4) (Cat eye syndrome critical region protein 1)	0	0	0	0	0	0	0	0	0	0	0	0	0	0	0	0	0	0	0	0	0	0	0	0	0	0	0	0	0	0	0	0	1.09425e+06	0	0	354766	0	0	0	194668	328615
	Q16658	FSCN1_HUMAN	Fascin (55 kDa actin-bundling protein) (Singed-like protein) (p55)	0	0	0	0	0	0	0	0	0	0	0	0	0	0	0	0	0	0	0	0	0	0	0	0	0	0	0	0	0	0	0	0	0	0	2.02026e+06	0	0	0	0	0	0
	P98095	FBLN2_HUMAN	Fibulin-2 (FIBL-2)	0	0	0	0	0	0	0	0	0	0	0	0	0	0	0	0	0	0	0	0	0	0	213869	0	0	0	0	273636	0	0	0	0	612940	0	0	96054.3	54422.8	781576	0	0	0
	Q16653	MOG_HUMAN	Myelin-oligodendrocyte glycoprotein	0	0	0	0	0	0	0	0	0	0	0	0	0	0	0	0	0	0	0	0	0	0	0	0	0	0	0	0	0	0	0	1.68106e+06	0	0	0	0	374656	0	0	0	0
	P29279	CTGF_HUMAN	Connective tissue growth factor (CCN family member 2) (Hypertrophic chondrocyte-specific protein 24) (Insulin-like growth factor-binding protein 8) (IBP-8) (IGF-binding protein 8) (IGFBP-8)	0	0	0	0	0	0	0	0	0	0	0	0	0	0	0	0	0	0	0	0	0	0	0	0	0	0	0	0	0	0	0	863672	1.20281e+06	0	0	0	0	0	0	0	0
	P60201	MYPR_HUMAN	Myelin proteolipid protein (PLP) (Lipophilin)	0	0	0	0	0	0	0	0	0	0	0	0	0	0	0	0	0	0	0	0	0	0	0	0	0	0	0	0	0	0	0	0	0	0	1.29172e+06	786933	0	0	0	0	0
	P07384	CAN1_HUMAN	Calpain-1 catalytic subunit (EC 3.4.22.52) (Calcium-activated neutral proteinase 1) (CANP 1) (Calpain mu-type) (Calpain-1 large subunit) (Cell proliferation-inducing gene 30 protein) (Micromolar-calpain) (muCANP)	0	0	0	0	0	0	0	0	0	0	0	0	0	0	0	0	0	0	0	0	0	0	0	0	0	0	645206	650709	0	0	0	0	0	0	806339	0	0	0	0	0	0
	P17213	BPI_HUMAN	Bactericidal permeability-increasing protein (BPI) (CAP 57)	0	0	0	0	0	0	0	0	0	0	0	0	0	0	0	0	0	0	0	0	0	0	0	0	0	0	695737	665970	0	0	0	0	0	0	0	0	0	761087	0	0	0
	Q9BTY2	FUCO2_HUMAN	Plasma alpha-L-fucosidase (EC 3.2.1.51) (Alpha-L-fucoside fucohydrolase 2) (Alpha-L-fucosidase 2)	0	0	0	0	0	0	0	0	0	0	0	0	0	0	0	0	0	0	0	0	0	0	0	0	0	0	0	0	0	0	0	573947	687607	0	864145	0	0	0	0	0	0
	P02008	HBAZ_HUMAN	Hemoglobin subunit zeta (HBAZ) (Hemoglobin zeta chain) (Zeta-globin)	0	0	0	0	0	0	0	0	0	0	0	0	0	0	0	2.16004e+06	0	0	0	0	0	0	0	0	0	0	0	0	0	0	0	0	0	0	0	0	0	0	0	0	0
	P78324	SHPS1_HUMAN	Tyrosine-protein phosphatase non-receptor type substrate 1 (SHP substrate 1) (SHPS-1) (Brain Ig-like molecule with tyrosine-based activation motifs) (Bit) (CD172 antigen-like family member A) (Inhibitory receptor SHPS-1) (Macrophage fusion receptor) (MyD-1 antigen) (Signal-regulatory protein alpha-1) (Sirp-alpha-1) (Signal-regulatory protein alpha-2) (Sirp-alpha-2) (Signal-regulatory protein alph…	0	0	0	0	0	0	0	0	0	0	0	0	0	0	0	0	0	0	0	0	0	0	0	0	0	0	0	0	0	0	0	0	2.20663e+06	0	0	0	0	0	0	0	0
	Q07954	LRP1_HUMAN	Prolow-density lipoprotein receptor-related protein 1 (LRP-1) (Alpha-2-macroglobulin receptor) (A2MR) (Apolipoprotein E receptor) (APOER) (CD antigen CD91) [Cleaved into: Low-density lipoprotein receptor-related protein 1 85 kDa subunit (LRP-85); Low-density lipoprotein receptor-related protein 1 515 kDa subunit (LRP-515); Low-density lipoprotein receptor-related protein 1 intracellular domain (L…	0	0	0	0	0	0	0	0	0	0	0	0	0	0	0	0	0	0	0	0	0	0	0	0	0	0	0	0	0	0	0	272145	356381	0	329399	0	0	1.26117e+06	0	0	0
	O94769	ECM2_HUMAN	Extracellular matrix protein 2 (Matrix glycoprotein SC1/ECM2)	0	0	0	0	0	0	0	0	0	0	0	0	0	0	0	0	0	0	0	0	0	0	0	0	0	178732	0	0	233469	0	0	0	681326	0	0	0	201120	943167	0	0	0
	O43405	COCH_HUMAN	Cochlin (COCH-5B2)	0	0	0	0	0	0	0	0	0	0	0	0	0	0	0	0	0	0	0	0	0	0	0	0	0	0	0	0	0	0	0	0	0	0	0	0	0	2.27817e+06	0	0	0
	P31150	GDIA_HUMAN	Rab GDP dissociation inhibitor alpha (Rab GDI alpha) (Guanosine diphosphate dissociation inhibitor 1) (GDI-1) (Oligophrenin-2) (Protein XAP-4)	0	0	0	0	0	0	0	0	0	0	0	0	0	0	0	0	0	0	0	0	0	0	0	0	0	0	0	0	0	0	0	0	0	0	1.90973e+06	0	0	0	0	0	385702
	O14818	PSA7_HUMAN	Proteasome subunit alpha type-7 (EC 3.4.25.1) (Proteasome subunit RC6-1) (Proteasome subunit XAPC7)	0	0	0	0	0	0	0	0	0	0	0	0	0	0	0	0	0	0	0	0	0	0	0	0	0	0	0	0	0	0	0	361068	0	0	587715	0	0	1.38157e+06	0	0	0
	P29966	MARCS_HUMAN	Myristoylated alanine-rich C-kinase substrate (MARCKS) (Protein kinase C substrate, 80 kDa protein, light chain) (80K-L protein) (PKCSL)	0	0	0	426612	0	0	0	0	0	0	0	0	0	0	0	0	0	0	0	0	0	0	0	0	0	0	371979	0	0	0	0	0	0	0	833633	0	0	648346	0	95701.6	0
	Q9UJJ9	GNPTG_HUMAN	N-acetylglucosamine-1-phosphotransferase subunit gamma (GlcNAc-1-phosphotransferase subunit gamma) (UDP-N-acetylglucosamine-1-phosphotransferase subunit gamma)	0	0	0	0	0	0	0	0	0	0	0	0	0	0	0	0	0	0	0	0	0	0	0	0	0	0	0	0	597768	0	0	607701	880490	0	0	318531	0	0	0	0	0
	Q13332	PTPRS_HUMAN	Receptor-type tyrosine-protein phosphatase S (R-PTP-S) (EC 3.1.3.48) (Receptor-type tyrosine-protein phosphatase sigma) (R-PTP-sigma)	0	0	0	0	0	0	0	0	0	0	0	0	0	0	0	0	0	0	0	0	0	0	0	0	0	0	0	0	0	0	0	0	470082	0	1.71109e+06	0	239927	0	0	0	0
	Q5KU26	COL12_HUMAN	Collectin-12 (Collectin placenta protein 1) (CL-P1) (hCL-P1) (Nurse cell scavenger receptor 2) (Scavenger receptor class A member 4) (Scavenger receptor with C-type lectin)	0	0	0	0	0	0	0	0	0	0	0	0	143035	0	0	418043	0	0	0	289614	0	0	0	0	0	0	0	0	0	0	0	380713	717829	0	0	0	348225	0	0	0	164619
	Q15365	PCBP1_HUMAN	Poly(rC)-binding protein 1 (Alpha-CP1) (Heterogeneous nuclear ribonucleoprotein E1) (hnRNP E1) (Nucleic acid-binding protein SUB2.3)	0	0	0	0	0	0	0	0	0	0	0	0	0	0	0	0	0	0	0	0	0	0	0	0	0	0	325044	0	0	0	0	0	0	0	0	0	0	2.15653e+06	0	0	0
	Q9ULZ3	ASC_HUMAN	Apoptosis-associated speck-like protein containing a CARD (hASC) (Caspase recruitment domain-containing protein 5) (PYD and CARD domain-containing protein) (Target of methylation-induced silencing 1)	0	0	0	0	0	0	0	0	0	0	0	0	0	0	0	0	0	0	0	0	0	0	0	0	0	0	0	0	0	0	0	0	0	0	0	0	0	2.50336e+06	0	0	0
	Q86UX2	ITIH5_HUMAN	Inter-alpha-trypsin inhibitor heavy chain H5 (ITI heavy chain H5) (ITI-HC5) (Inter-alpha-inhibitor heavy chain 5)	0	0	0	0	0	0	0	0	0	0	0	0	0	0	0	0	0	0	0	0	0	0	0	0	0	0	0	0	0	0	0	0	1.05956e+06	0	0	0	364518	1095601	0	0	0
	Q9H3G5	CPVL_HUMAN	Probable serine carboxypeptidase CPVL (EC 3.4.16.-) (Carboxypeptidase, vitellogenic-like) (Vitellogenic carboxypeptidase-like protein) (VCP-like protein) (hVLP)	0	0	0	0	0	0	0	0	0	0	0	0	0	0	0	0	0	0	0	0	0	244716	0	516760	509341	0	0	0	0	0	0	567835	0	0	0	0	0	0	0	281699	421070
	O75015	FCG3B_HUMAN	Low affinity immunoglobulin gamma Fc region receptor III-B (Fc-gamma RIII-beta) (Fc-gamma RIII) (Fc-gamma RIIIb) (FcRIII) (FcRIIIb) (FcR-10) (IgG Fc receptor III-1) (CD antigen CD16b)	0	0	0	0	0	0	0	0	0	0	0	0	0	0	0	0	0	0	0	0	0	0	0	0	0	0	0	0	0	0	2.54692e+06	0	0	0	0	0	0	0	0	0	0
	P15291	B4GT1_HUMAN	Beta-1,4-galactosyltransferase 1 (Beta-1,4-GalTase 1) (Beta4Gal-T1) (b4Gal-T1) (EC 2.4.1.-) (UDP-Gal:beta-GlcNAc beta-1,4-galactosyltransferase 1) (UDP-galactose:beta-N-acetylglucosamine beta-1,4-galactosyltransferase 1) [Cleaved into: Processed beta-1,4-galactosyltransferase 1] [Includes: Lactose synthase A protein (EC 2.4.1.22); N-acetyllactosamine synthase (EC 2.4.1.90) (Nal synthase); Beta-N-…	0	0	0	0	0	0	0	0	0	0	0	0	0	0	0	0	0	0	0	0	0	0	0	0	0	0	0	713530	647736	0	0	0	0	0	0	0	0	1.18731e+06	0	0	0
	Q8N3J6	CADM2_HUMAN	Cell adhesion molecule 2 (Immunoglobulin superfamily member 4D) (IgSF4D) (Nectin-like protein 3) (NECL-3) (Synaptic cell adhesion molecule 2) (SynCAM 2)	0	0	0	0	0	0	0	0	0	0	0	0	0	0	0	0	0	0	0	0	0	0	0	0	0	0	0	0	0	0	0	468304	1.3646e+06	0	0	0	743574	0	0	0	0
	P36871	PGM1_HUMAN	Phosphoglucomutase-1 (PGM 1) (EC 5.4.2.2) (Glucose phosphomutase 1)	0	0	0	0	0	0	0	0	0	0	0	0	0	0	0	0	0	0	0	0	0	0	0	0	0	0	479071	0	0	0	0	0	0	0	684449	0	0	1.43959e+06	0	0	0
	P05154	IPSP_HUMAN	Plasma serine protease inhibitor (Acrosomal serine protease inhibitor) (Plasminogen activator inhibitor 3) (PAI-3) (PAI3) (Protein C inhibitor) (PCI) (Serpin A5)	0	0	0	0	0	0	0	0	0	0	0	0	0	0	0	857879	0	0	0	449914	0	0	0	0	0	487701	0	0	0	520900	0	0	0	0	0	0	346826	0	0	0	0
	P13598	ICAM2_HUMAN	Intercellular adhesion molecule 2 (ICAM-2) (CD antigen CD102)	0	0	0	0	0	0	0	0	0	0	0	0	0	0	0	0	0	0	0	0	0	0	502794	0	0	0	0	0	389401	0	0	0	473314	0	0	0	0	1.30935e+06	0	0	0
	P02533	K1C14_HUMAN	Keratin, type I cytoskeletal 14 (Cytokeratin-14) (CK-14) (Keratin-14) (K14)	0	0	0	0	0	0	0	0	0	0	0	0	0	0	0	0	0	0	0	0	0	272016	0	0	0	378059	0	0	0	0	0	0	0	0	0	1.58147e+06	461355	0	0	0	0
	Q09666	AHNK_HUMAN	Neuroblast differentiation-associated protein AHNAK (Desmoyokin)	0	0	0	436057	0	0	0	0	0	0	0	0	335624	202029	821460	666018	0	0	0	258404	0	0	0	0	0	0	0	0	0	0	0	0	0	0	0	0	0	0	0	0	0
	P59666	DEF3_HUMAN	Neutrophil defensin 3 (Defensin, alpha 3) (HNP-3) (HP-3) (HP3) [Cleaved into: HP 3-56; Neutrophil defensin 2 (HNP-2) (HP-2) (HP2)]	0	0	0	0	0	0	0	0	0	0	0	0	0	0	0	0	0	0	0	0	0	0	0	0	0	0	1.0821e+06	1.65303e+06	0	0	0	0	0	0	0	0	0	0	0	0	0
	Q9NT99	LRC4B_HUMAN	Leucine-rich repeat-containing protein 4B (Netrin-G3 ligand) (NGL-3)	0	0	0	0	0	0	0	0	0	0	0	0	0	0	0	0	0	0	0	0	0	0	0	0	0	0	0	0	0	0	0	407664	1.22432e+06	0	0	0	0	1.19045e+06	0	0	0
	Q01995	TAGL_HUMAN	Transgelin (22 kDa actin-binding protein) (Protein WS3-10) (Smooth muscle protein 22-alpha) (SM22-alpha)	0	0	0	0	0	0	0	0	0	0	0	0	0	174400	1.05805e+06	1.04124e+06	0	0	0	243197	0	0	0	0	0	0	0	0	0	0	0	0	310165	0	0	0	0	0	0	0	0
	P14314	GLU2B_HUMAN	Glucosidase 2 subunit beta (80K-H protein) (Glucosidase II subunit beta) (Protein kinase C substrate 60.1 kDa protein heavy chain) (PKCSH)	0	0	0	0	0	0	0	0	0	0	0	0	0	0	0	0	0	0	0	0	0	0	0	0	0	0	0	0	0	0	0	278068	1.43894e+06	0	0	0	340735	819038	0	0	0
	O94760	DDAH1_HUMAN	N(G),N(G)-dimethylarginine dimethylaminohydrolase 1 (DDAH-1) (Dimethylarginine dimethylaminohydrolase 1) (EC 3.5.3.18) (DDAHI) (Dimethylargininase-1)	0	0	0	0	0	0	0	0	0	0	0	0	0	0	0	0	0	0	0	0	0	200725	0	0	0	0	0	0	0	0	0	0	0	0	2.03764e+06	660319	0	0	0	0	0
	P43121	MUC18_HUMAN	Cell surface glycoprotein MUC18 (Cell surface glycoprotein P1H12) (Melanoma cell adhesion molecule) (Melanoma-associated antigen A32) (Melanoma-associated antigen MUC18) (S-endo 1 endothelial-associated antigen) (CD antigen CD146)	0	0	0	0	0	0	0	0	0	0	0	0	0	0	0	0	0	0	0	0	0	0	0	0	0	0	0	0	0	0	0	0	1.02871e+06	0	1.43828e+06	306950	131195	0	0	0	0
	Q5BLP8	CD048_HUMAN	Neuropeptide-like protein C4orf48	0	0	0	0	0	0	0	0	0	0	0	0	0	0	0	0	0	0	0	0	0	0	0	0	0	0	0	0	0	0	0	0	2.93998e+06	0	0	0	0	0	0	0	0
	P25774	CATS_HUMAN	Cathepsin S (EC 3.4.22.27)	0	0	0	0	0	0	0	0	0	0	0	0	0	0	0	0	0	0	0	0	0	0	0	0	0	0	0	504606	284434	0	0	475437	330690	0	0	0	0	1.20249e+06	0	185157	0
	P13716	HEM2_HUMAN	Delta-aminolevulinic acid dehydratase (ALADH) (EC 4.2.1.24) (Porphobilinogen synthase)	0	0	0	0	0	0	0	0	0	0	0	699085	0	0	0	0	0	0	0	873811	734892	0	0	0	0	0	0	0	0	0	0	0	0	0	724120	0	0	0	0	0	0
	Q6UXD5	SE6L2_HUMAN	Seizure 6-like protein 2	0	0	0	0	0	0	0	0	0	0	0	0	0	0	0	0	0	0	0	0	0	0	0	0	0	0	0	0	0	0	0	402921	1.27984e+06	0	0	0	286105	1.07761e+06	0	0	0
	P13647	K2C5_HUMAN	Keratin, type II cytoskeletal 5 (58 kDa cytokeratin) (Cytokeratin-5) (CK-5) (Keratin-5) (K5) (Type-II keratin Kb5)	0	0	0	0	0	0	0	0	0	0	0	0	0	0	0	0	0	0	0	0	0	478901	0	0	395498	1.00689e+06	0	0	0	0	0	0	0	0	0	683778	547051	0	0	0	0
	Q14314	FGL2_HUMAN	Fibroleukin (Fibrinogen-like protein 2) (pT49)	0	0	0	0	0	0	0	0	0	0	0	0	0	0	0	0	0	0	0	0	0	0	0	0	0	0	0	655088	0	0	289909	0	0	0	0	0	0	2.17837e+06	0	0	0
	P35318	ADML_HUMAN	ADM [Cleaved into: Adrenomedullin (AM); Proadrenomedullin N-20 terminal peptide (ProAM N-terminal 20 peptide) (PAMP) (ProAM-N20)]	0	0	0	0	0	0	0	0	0	0	0	0	0	0	764155	0	0	0	0	0	0	0	0	0	0	0	0	0	0	0	0	0	0	642155	0	0	0	1.49985e+06	242192	0	0
	P04632	CPNS1_HUMAN	Calpain small subunit 1 (CSS1) (Calcium-activated neutral proteinase small subunit) (CANP small subunit) (Calcium-dependent protease small subunit) (CDPS) (Calcium-dependent protease small subunit 1) (Calpain regulatory subunit)	0	0	0	443840	0	0	0	0	0	0	0	0	0	251968	1.04751e+06	1.06474e+06	0	0	0	392456	0	0	0	0	0	0	0	0	0	0	0	0	0	0	0	0	0	0	0	0	0
	P20916	MAG_HUMAN	Myelin-associated glycoprotein (Siglec-4a)	0	0	0	0	0	0	0	0	0	0	0	0	0	0	0	0	0	0	0	0	0	0	0	0	0	0	0	0	0	0	0	0	0	0	2.41766e+06	268339	0	0	0	175665	410636
	Q99674	CGRE1_HUMAN	Cell growth regulator with EF hand domain protein 1 (Cell growth regulatory gene 11 protein) (Hydrophobestin)	0	0	0	0	0	0	0	0	0	0	0	0	0	0	0	0	0	0	0	0	0	0	0	75399.2	0	0	0	0	250883	0	0	351176	1.01171e+06	0	0	336637	233991	1.04633e+06	0	0	0
	P03951	FA11_HUMAN	Coagulation factor XI (FXI) (EC 3.4.21.27) (Plasma thromboplastin antecedent) (PTA) [Cleaved into: Coagulation factor XIa heavy chain; Coagulation factor XIa light chain]	0	0	0	0	0	0	0	0	0	0	0	0	0	0	0	0	0	0	0	0	0	0	0	0	0	0	849184	775660	784724	956962	0	0	0	0	0	0	0	0	0	0	0
	Q9BRA2	TXD17_HUMAN	Thioredoxin domain-containing protein 17 (14 kDa thioredoxin-related protein) (TRP14) (Protein 42-9-9) (Thioredoxin-like protein 5)	0	0	0	0	0	0	0	0	0	0	0	0	0	0	0	0	0	0	0	0	291930	0	0	0	0	0	0	0	0	0	0	0	0	0	556165	0	0	2.53127e+06	0	0	0
	Q15942	ZYX_HUMAN	Zyxin (Zyxin-2)	0	0	0	0	0	0	0	0	0	0	0	0	0	0	0	0	0	0	0	0	0	0	0	0	0	0	768994	802111	0	0	0	299591	0	0	0	0	0	1.54681e+06	0	0	0
	P02775	CXCL7_HUMAN	Platelet basic protein (PBP) (C-X-C motif chemokine 7) (Leukocyte-derived growth factor) (LDGF) (Macrophage-derived growth factor) (MDGF) (Small-inducible cytokine B7) [Cleaved into: Connective tissue-activating peptide III (CTAP-III) (LA-PF4) (Low-affinity platelet factor IV); TC-2; Connective tissue-activating peptide III(1-81) (CTAP-III(1-81)); Beta-thromboglobulin (Beta-TG); Neutrophil-activa…	1.13856e+06	0	0	0	0	0	0	0	0	0	0	0	0	0	0	0	0	0	0	0	0	0	0	0	0	732842	0	0	0	0	0	0	0	0	1.57181e+06	0	0	0	0	0	0
	P11171	41_HUMAN	Protein 4.1 (P4.1) (4.1R) (Band 4.1) (EPB4.1)	0	0	0	0	0	0	0	0	0	0	0	0	855835	759766	0	1830635	0	0	0	0	0	0	0	0	0	0	0	0	0	0	0	0	0	0	0	0	0	0	0	0	0
	P46976	GLYG_HUMAN	Glycogenin-1 (GN-1) (GN1) (EC 2.4.1.186)	0	0	0	0	0	0	0	0	0	0	0	0	0	0	0	0	0	0	0	0	0	0	0	0	0	0	661256	796134	0	0	0	0	0	0	0	0	0	2.04205e+06	0	0	0
	Q9P2S2	NRX2A_HUMAN	Neurexin-2 (Neurexin II-alpha) (Neurexin-2-alpha)	0	0	0	0	0	0	0	0	0	0	0	0	0	0	0	0	0	0	0	0	0	0	0	0	0	0	0	0	0	0	0	0	3.13983e+06	0	0	0	388953	0	0	0	0
	O43493	TGON2_HUMAN	Trans-Golgi network integral membrane protein 2 (TGN38 homolog) (TGN46) (TGN48) (Trans-Golgi network protein TGN51)	0	0	0	0	0	0	0	0	0	0	0	0	0	0	0	0	0	0	0	0	0	0	186806	72837.2	0	0	0	206838	281525	0	0	232888	724739	128933	437358	134580	341631	622464	0	85717.6	83773.9
	Q92859	NEO1_HUMAN	Neogenin (Immunoglobulin superfamily DCC subclass member 2)	0	0	0	0	0	0	0	0	0	0	0	0	0	0	0	0	0	0	0	0	0	0	0	0	0	0	0	179371	129796	0	0	315683	961021	0	381424	147251	328636	966962	0	0	134270
	Q9NYQ8	FAT2_HUMAN	Protocadherin Fat 2 (hFat2) (Cadherin family member 8) (Multiple epidermal growth factor-like domains protein 1) (Multiple EGF-like domains protein 1)	0	0	0	0	0	0	0	0	0	0	0	0	0	0	0	0	0	0	0	0	0	0	0	0	0	0	0	0	0	0	0	3.5485e+06	0	0	0	0	0	0	0	0	0
	P21802	FGFR2_HUMAN	Fibroblast growth factor receptor 2 (FGFR-2) (EC 2.7.10.1) (K-sam) (KGFR) (Keratinocyte growth factor receptor) (CD antigen CD332)	0	0	0	0	0	0	0	0	0	0	0	0	0	0	0	0	0	0	0	0	0	0	0	0	0	0	0	0	0	0	0	915641	1.37767e+06	0	578427	0	328825	0	0	0	392777
	P60953	CDC42_HUMAN	Cell division control protein 42 homolog (G25K GTP-binding protein)	0	0	0	0	0	0	0	0	0	0	0	0	0	0	0	0	0	0	0	0	0	0	0	0	0	0	554202	355474	0	0	0	0	0	0	466793	0	0	2.22248e+06	0	0	0
	P08174	DAF_HUMAN	Complement decay-accelerating factor (CD antigen CD55)	0	0	0	0	0	0	0	0	0	0	0	0	0	0	0	0	0	0	0	0	0	0	0	0	0	0	0	0	0	0	0	713473	0	0	0	0	342451	2.56832e+06	0	0	0
	O75326	SEM7A_HUMAN	Semaphorin-7A (CDw108) (JMH blood group antigen) (John-Milton-Hargen human blood group Ag) (Semaphorin-K1) (Sema K1) (Semaphorin-L) (Sema L) (CD antigen CD108)	0	0	0	0	0	0	0	0	0	0	0	0	0	0	0	0	0	0	0	0	0	0	0	0	0	0	0	334806	0	0	0	485487	950650	0	499642	0	283325	866448	0	0	259739
	P08254	MMP3_HUMAN	Stromelysin-1 (SL-1) (EC 3.4.24.17) (Matrix metalloproteinase-3) (MMP-3) (Transin-1)	0	0	0	0	0	0	0	0	0	0	0	0	0	0	0	0	0	0	0	0	0	0	1.3857e+06	0	0	0	350298	334342	0	0	0	0	0	587885	698211	173954	0	294903	0	0	0
	P28066	PSA5_HUMAN	Proteasome subunit alpha type-5 (EC 3.4.25.1) (Macropain zeta chain) (Multicatalytic endopeptidase complex zeta chain) (Proteasome zeta chain)	0	0	0	490386	0	0	0	0	0	0	0	0	0	0	1.62735e+06	1.13643e+06	0	0	0	451545	251140	0	0	0	0	0	0	0	0	0	0	0	0	0	0	0	0	0	0	0	0
	Q9Y6N5	SQRD_HUMAN	Sulfide:quinone oxidoreductase, mitochondrial (SQOR) (EC 1.8.5.-)	0	0	0	0	0	0	0	0	0	0	0	0	0	0	0	0	0	0	0	0	0	0	0	0	0	0	0	0	0	0	3.98977e+06	0	0	0	0	0	0	0	0	0	0
	Q6UXB8	PI16_HUMAN	Peptidase inhibitor 16 (PI-16) (Cysteine-rich secretory protein 9) (CRISP-9) (PSP94-binding protein)	0	0	0	0	0	0	0	0	0	0	0	0	0	0	0	0	0	0	0	0	0	0	0	0	0	0	0	0	571664	0	0	0	615358	0	0	0	434352	2.40214e+06	0	0	0
	P06276	CHLE_HUMAN	Cholinesterase (EC 3.1.1.8) (Acylcholine acylhydrolase) (Butyrylcholine esterase) (Choline esterase II) (Pseudocholinesterase)	719278	0	0	0	0	0	0	0	0	0	0	0	0	0	0	0	0	0	0	0	0	0	1.69391e+06	0	0	0	0	0	0	1.64129e+06	0	0	0	0	0	0	0	0	0	0	0
	P46940	IQGA1_HUMAN	Ras GTPase-activating-like protein IQGAP1 (p195)	0	0	0	0	0	0	0	0	0	0	0	0	0	0	0	0	0	0	0	435734	0	0	0	0	0	0	516248	602959	0	0	0	741758	0	0	0	0	0	1.76996e+06	0	0	0
	O95998	I18BP_HUMAN	Interleukin-18-binding protein (IL-18BP) (Tadekinig-alfa)	0	0	0	0	0	0	0	0	0	0	0	0	0	0	0	0	0	0	0	0	0	0	0	0	0	0	0	0	0	0	0	201642	0	0	0	0	0	3.86733e+06	0	0	0
	O14618	CCS_HUMAN	Copper chaperone for superoxide dismutase (Superoxide dismutase copper chaperone)	0	0	0	0	0	0	0	0	0	0	0	0	765213	794545	2.58654e+06	0	0	0	0	0	0	0	0	0	0	0	0	0	0	0	0	0	0	0	0	0	0	0	0	0	0
	Q8N6Q3	CD177_HUMAN	CD177 antigen (Human neutrophil alloantigen 2a) (HNA-2a) (NB1 glycoprotein) (NB1 GP) (Polycythemia rubra vera protein 1) (PRV-1) (CD antigen CD177)	0	0	0	0	0	0	0	0	0	0	0	0	0	0	0	0	0	0	0	0	0	0	0	0	0	0	0	0	0	0	0	0	0	0	670102	0	0	2.29996e+06	1.21767e+06	0	0
	O15145	ARPC3_HUMAN	Actin-related protein 2/3 complex subunit 3 (Arp2/3 complex 21 kDa subunit) (p21-ARC)	0	0	0	0	0	0	0	0	0	0	0	0	0	0	0	0	0	0	0	0	0	0	0	0	0	0	629439	0	0	0	0	0	0	0	0	0	0	3.56398e+06	0	0	0
	P23515	OMGP_HUMAN	Oligodendrocyte-myelin glycoprotein	0	0	0	0	0	0	0	0	0	0	0	0	0	0	0	0	0	0	0	0	0	0	0	188623	0	0	0	0	0	0	0	577671	1.25291e+06	0	729751	0	896085	0	0	237028	318128
	P19971	TYPH_HUMAN	Thymidine phosphorylase (TP) (EC 2.4.2.4) (Gliostatin) (Platelet-derived endothelial cell growth factor) (PD-ECGF) (TdRPase)	0	0	0	0	0	0	0	0	0	0	0	0	0	0	0	0	0	0	0	0	0	0	0	0	0	0	593207	0	0	0	0	337887	0	0	524216	0	0	2.76019e+06	0	0	0
	P25789	PSA4_HUMAN	Proteasome subunit alpha type-4 (EC 3.4.25.1) (Macropain subunit C9) (Multicatalytic endopeptidase complex subunit C9) (Proteasome component C9) (Proteasome subunit L)	0	0	0	0	0	0	0	0	0	0	0	0	0	0	0	0	0	0	0	731053	0	0	0	0	0	0	0	0	0	0	0	585249	0	0	0	0	0	2.93525e+06	0	0	0
	P07437	TBB5_HUMAN	Tubulin beta chain (Tubulin beta-5 chain)	0	0	0	0	0	0	0	0	0	0	0	0	0	0	0	0	0	0	0	0	0	0	0	0	0	0	0	0	0	0	0	0	0	0	0	0	0	4.26114e+06	0	0	0
	P20062	TCO2_HUMAN	Transcobalamin-2 (TC-2) (Transcobalamin II) (TC II) (TCII)	0	0	0	0	0	0	0	0	0	0	0	0	0	0	0	0	0	0	0	0	0	0	0	0	0	0	256410	602944	488448	0	0	0	458859	0	0	0	178389	2.32284e+06	0	0	0
	P23526	SAHH_HUMAN	Adenosylhomocysteinase (AdoHcyase) (EC 3.3.1.1) (S-adenosyl-L-homocysteine hydrolase)	0	0	0	0	0	0	0	0	0	0	0	0	0	732253	2.09886e+06	0	0	0	0	642748	0	0	0	0	0	0	470492	405665	0	0	0	0	0	0	0	0	0	0	0	0	0
	P19021	AMD_HUMAN	Peptidyl-glycine alpha-amidating monooxygenase (PAM) [Includes: Peptidylglycine alpha-hydroxylating monooxygenase (PHM) (EC 1.14.17.3); Peptidyl-alpha-hydroxyglycine alpha-amidating lyase (EC 4.3.2.5) (Peptidylamidoglycolate lyase) (PAL)]	0	0	0	0	0	0	0	0	0	0	0	0	0	0	0	0	0	0	0	325524	0	0	0	0	0	0	0	628570	0	0	0	295141	903041	0	439457	354788	0	1.45966e+06	0	0	0
	Q16568	CART_HUMAN	Cocaine- and amphetamine-regulated transcript protein [Cleaved into: CART(1-39); CART(42-89)]	0	0	0	0	0	0	0	0	0	0	0	0	0	0	0	0	0	0	0	0	0	0	0	0	0	0	0	328637	447612	0	0	333173	1.38785e+06	0	413508	185312	340666	969857	0	0	0
	Q9H8L6	MMRN2_HUMAN	Multimerin-2 (EMILIN-3) (Elastin microfibril interface located protein 3) (Elastin microfibril interfacer 3) (EndoGlyx-1 p125/p140 subunit)	0	0	0	0	0	0	0	0	0	0	0	0	0	0	0	0	0	0	0	474112	0	0	0	0	0	0	0	0	0	0	0	431317	1.09582e+06	0	0	0	0	2.43416e+06	0	0	0
	Q13790	APOF_HUMAN	Apolipoprotein F (Apo-F) (Lipid transfer inhibitor protein) (LTIP)	0	0	0	0	0	0	0	0	0	0	0	0	0	0	0	0	0	0	0	0	0	0	0	0	0	1.3277e+06	0	715798	0	1.25098e+06	0	0	0	684082	0	0	0	0	519934	0	0
	P25713	MT3_HUMAN	Metallothionein-3 (MT-3) (GIFB) (GIF) (Growth inhibitory factor) (Metallothionein-III) (MT-III)	0	0	0	0	0	0	0	0	0	0	0	0	0	0	0	0	0	0	0	0	0	0	0	0	0	0	0	0	0	0	0	242244	433356	0	3.11919e+06	435958	0	0	0	157336	173531
	P27348	1433T_HUMAN	14-3-3 protein theta (14-3-3 protein T-cell) (14-3-3 protein tau) (Protein HS1)	0	0	0	0	0	0	0	0	0	0	0	0	0	0	0	0	0	0	0	398645	0	0	0	0	0	0	0	0	0	0	0	0	0	0	1.48487e+06	0	0	2.70593e+06	0	0	0
	P51149	RAB7A_HUMAN	Ras-related protein Rab-7a	0	0	0	0	0	0	0	0	0	0	0	0	0	0	0	0	0	0	0	0	0	0	0	0	0	0	537488	0	0	0	0	0	0	0	1.1845e+06	0	0	2.89198e+06	0	0	0
	P54764	EPHA4_HUMAN	Ephrin type-A receptor 4 (EC 2.7.10.1) (EPH-like kinase 8) (EK8) (hEK8) (Tyrosine-protein kinase TYRO1) (Tyrosine-protein kinase receptor SEK)	0	0	0	0	0	0	0	0	0	0	0	0	0	0	0	0	0	0	0	0	0	0	0	0	0	0	0	0	0	0	0	357657	1.88641e+06	0	609600	483196	255493	946608	0	0	86179.3
	P54289	CA2D1_HUMAN	Voltage-dependent calcium channel subunit alpha-2/delta-1 (Voltage-gated calcium channel subunit alpha-2/delta-1) [Cleaved into: Voltage-dependent calcium channel subunit alpha-2-1; Voltage-dependent calcium channel subunit delta-1]	0	0	0	0	0	0	0	0	0	0	0	0	0	0	0	0	0	0	0	0	0	0	151108	0	0	0	0	0	0	0	0	546937	1.39275e+06	0	522632	390594	279439	1.36029e+06	0	0	0
	Q04756	HGFA_HUMAN	Hepatocyte growth factor activator (HGF activator) (HGFA) (EC 3.4.21.-) [Cleaved into: Hepatocyte growth factor activator short chain; Hepatocyte growth factor activator long chain]	294206	0	0	0	0	0	0	0	0	0	0	0	0	0	0	0	0	0	0	0	0	0	931439	0	0	874249	448467	0	610689	553220	0	0	0	312391	527791	98867.1	0	0	0	0	0
	Q99536	VAT1_HUMAN	Synaptic vesicle membrane protein VAT-1 homolog (EC 1.-.-.-)	0	0	0	0	0	0	0	0	0	0	0	0	0	0	0	0	0	0	0	430396	0	0	0	0	0	0	548699	865390	0	0	0	0	0	0	579142	0	0	2.30632e+06	0	0	0
	P12429	ANXA3_HUMAN	Annexin A3 (35-alpha calcimedin) (Annexin III) (Annexin-3) (Inositol 1,2-cyclic phosphate 2-phosphohydrolase) (Lipocortin III) (Placental anticoagulant protein III) (PAP-III)	0	0	0	0	0	0	0	0	0	0	0	0	0	0	0	0	0	0	0	0	177190	0	0	0	0	0	902617	863028	408170	0	0	566028	0	0	597990	0	0	1.37768e+06	0	0	0
	Q08629	TICN1_HUMAN	Testican-1 (Protein SPOCK)	0	0	0	0	0	0	0	0	0	0	0	0	0	0	0	0	0	0	0	0	0	0	0	0	0	0	0	408469	233587	0	0	425925	399551	0	1.64193e+06	161232	279864	0	0	161968	1.23692e+06
	Q9BZQ8	NIBAN_HUMAN	Protein Niban (Cell growth-inhibiting gene 39 protein) (Protein FAM129A)	0	0	0	0	0	0	0	0	0	0	0	0	0	0	0	0	0	0	0	0	0	0	0	0	0	0	0	0	0	0	0	0	0	0	0	0	0	4.95967e+06	0	0	0
	O00468	AGRIN_HUMAN	Agrin [Cleaved into: Agrin N-terminal 110 kDa subunit; Agrin C-terminal 110 kDa subunit; Agrin C-terminal 90 kDa fragment (C90); Agrin C-terminal 22 kDa fragment (C22)]	0	0	0	0	0	0	0	0	0	0	0	0	0	0	0	0	0	0	0	0	0	0	0	0	0	0	0	0	0	0	0	589380	1.18482e+06	0	662881	0	389990	1.86629e+06	0	0	268360
	P50552	VASP_HUMAN	Vasodilator-stimulated phosphoprotein (VASP)	0	0	0	0	0	0	0	0	0	0	0	0	0	0	0	0	0	0	0	324683	0	0	0	0	0	0	448896	657925	1.00184e+06	0	0	616932	0	0	478421	0	0	1.49929e+06	0	0	0
	P04271	S100B_HUMAN	Protein S100-B (S-100 protein beta chain) (S-100 protein subunit beta) (S100 calcium-binding protein B)	0	0	0	0	0	0	0	0	0	0	0	0	0	0	0	0	0	0	0	0	0	0	0	0	0	0	0	0	0	0	0	0	0	0	4.80795e+06	0	0	0	0	247794	0
	O75787	RENR_HUMAN	Renin receptor (ATPase H(+)-transporting lysosomal accessory protein 2) (ATPase H(+)-transporting lysosomal-interacting protein 2) (ER-localized type I transmembrane adaptor) (Embryonic liver differentiation factor 10) (N14F) (Renin/prorenin receptor) (Vacuolar ATP synthase membrane sector-associated protein M8-9) (ATP6M8-9) (V-ATPase M8.9 subunit)	0	0	0	0	0	0	0	0	0	0	0	0	0	0	0	777876	0	0	0	0	0	0	0	0	0	0	0	1.32847e+06	0	0	0	761161	580431	0	0	0	0	1.68941e+06	0	0	0
	P22061	PIMT_HUMAN	Protein-L-isoaspartate(D-aspartate) O-methyltransferase (PIMT) (EC 2.1.1.77) (L-isoaspartyl protein carboxyl methyltransferase) (Protein L-isoaspartyl/D-aspartyl methyltransferase) (Protein-beta-aspartate methyltransferase)	0	0	0	0	0	0	0	0	0	0	0	0	0	0	2.46793e+06	1.84708e+06	0	0	0	0	0	0	0	0	0	0	465820	363290	0	0	0	0	0	0	0	0	0	0	0	0	0
	Q8TAG5	VTM2A_HUMAN	V-set and transmembrane domain-containing protein 2A	0	0	0	0	0	0	0	0	0	0	0	0	0	0	0	0	0	0	0	0	0	0	0	101973	0	0	0	0	0	0	0	707680	1.54921e+06	0	796068	440435	460927	828204	0	83203.4	182310
	Q9BYH1	SE6L1_HUMAN	Seizure 6-like protein	0	0	0	0	0	0	0	0	0	0	0	0	0	0	0	0	0	0	0	0	0	0	0	0	0	0	0	0	0	0	0	496466	1.95439e+06	0	693476	384324	440166	1.22825e+06	0	0	0
	P06737	PYGL_HUMAN	Glycogen phosphorylase, liver form (EC 2.4.1.1)	0	0	0	0	0	0	0	0	0	0	0	0	0	0	0	0	0	0	0	332554	201893	0	0	0	0	0	755296	1.08178e+06	405295	0	0	472963	0	0	491243	247756	0	1.25207e+06	0	0	0
	Q04917	1433F_HUMAN	14-3-3 protein eta (Protein AS1)	0	0	0	0	0	0	0	0	0	0	0	0	0	0	0	690178	0	0	0	0	0	0	0	0	0	0	363069	546932	0	0	0	0	0	0	860033	0	0	2.53948e+06	0	0	258110
	P22626	ROA2_HUMAN	Heterogeneous nuclear ribonucleoproteins A2/B1 (hnRNP A2/B1)	0	0	0	513445	0	0	0	0	0	0	0	0	328266	0	0	0	0	0	0	0	0	0	0	0	0	0	685467	0	0	0	0	0	0	0	0	0	0	3.74707e+06	0	0	0
	O95336	6PGL_HUMAN	6-phosphogluconolactonase (6PGL) (EC 3.1.1.31)	0	0	0	0	0	0	0	0	0	0	0	0	0	0	1.45289e+06	684762	0	0	0	0	0	0	0	0	0	0	407891	426683	0	0	0	0	0	0	0	0	0	2.36274e+06	0	0	0
	O14594	NCAN_HUMAN	Neurocan core protein (Chondroitin sulfate proteoglycan 3)	0	0	0	0	0	0	0	0	0	0	0	0	0	0	0	0	0	0	0	0	0	0	0	0	0	0	0	0	0	0	0	717915	1.34821e+06	0	761804	610590	384260	978576	0	0	555992
	P12277	KCRB_HUMAN	Creatine kinase B-type (EC 2.7.3.2) (B-CK) (Creatine kinase B chain)	0	0	0	0	0	0	0	0	0	0	0	0	0	0	0	0	0	0	0	0	0	153920	0	0	0	0	0	0	0	722304	665976	0	0	554076	1.94534e+06	392676	0	0	586167	131377	254117
	Q15063	POSTN_HUMAN	Periostin (PN) (Osteoblast-specific factor 2) (OSF-2)	0	0	0	0	0	0	0	0	0	0	0	0	0	0	0	0	0	0	0	0	0	0	0	0	0	1.22779e+06	331269	595304	3.34316e+06	0	0	0	0	0	0	0	0	0	0	0	0
	P05107	ITB2_HUMAN	Integrin beta-2 (Cell surface adhesion glycoproteins LFA-1/CR3/p150,95 subunit beta) (Complement receptor C3 subunit beta) (CD antigen CD18)	0	0	0	0	0	0	0	0	0	0	0	0	0	0	0	0	0	0	0	0	0	0	0	0	0	0	299752	158340	0	1.73005e+06	773800	0	0	377898	372933	0	0	1.42864e+06	405233	0	0
	P48745	NOV_HUMAN	Protein NOV homolog (NovH) (CCN family member 3) (Insulin-like growth factor-binding protein 9) (IBP-9) (IGF-binding protein 9) (IGFBP-9) (Nephroblastoma-overexpressed gene protein homolog)	0	0	0	0	0	0	0	0	0	0	0	0	0	0	0	0	0	0	0	0	0	0	0	0	0	0	0	0	0	0	0	492548	1.26145e+06	0	546829	424424	721501	1.95231e+06	0	0	196183
	Q01459	DIAC_HUMAN	Di-N-acetylchitobiase (EC 3.2.1.-)	0	0	0	0	0	0	0	0	0	0	0	0	0	0	0	0	0	0	0	0	0	0	0	0	0	786690	0	381530	527986	366720	0	463851	585728	245612	396529	0	0	1.51475e+06	0	0	340135
	P00390	GSHR_HUMAN	Glutathione reductase, mitochondrial (GR) (GRase) (EC 1.8.1.7)	0	0	0	724906	0	0	0	0	0	0	0	0	383919	381816	1.69461e+06	1.563e+06	0	0	0	891219	0	0	0	0	0	0	0	0	0	0	0	0	0	0	0	0	0	0	0	0	0
	O95967	FBLN4_HUMAN	EGF-containing fibulin-like extracellular matrix protein 2 (Fibulin-4) (FIBL-4) (Protein UPH1)	0	0	0	0	0	0	0	0	0	0	0	0	0	0	0	0	0	0	0	0	0	0	0	0	0	0	411898	830306	805893	0	0	0	1.42902e+06	0	0	0	241267	1.98624e+06	0	0	0
	P62826	RAN_HUMAN	GTP-binding nuclear protein Ran (Androgen receptor-associated protein 24) (GTPase Ran) (Ras-like protein TC4) (Ras-related nuclear protein)	0	0	0	0	0	0	0	0	0	0	0	0	0	0	0	0	0	0	0	0	0	0	0	0	0	0	431829	0	0	0	0	0	0	0	0	0	0	5.37972e+06	0	0	0
	P61978	HNRPK_HUMAN	Heterogeneous nuclear ribonucleoprotein K (hnRNP K) (Transformation up-regulated nuclear protein) (TUNP)	0	0	0	429933	0	0	0	0	0	0	0	0	205079	0	557172	624915	0	0	0	174570	0	0	0	0	0	0	706369	0	0	0	0	0	0	0	785287	0	0	2.3312e+06	0	0	0
	O75347	TBCA_HUMAN	Tubulin-specific chaperone A (TCP1-chaperonin cofactor A) (Tubulin-folding cofactor A) (CFA)	0	0	0	0	0	0	0	0	0	0	0	0	470549	0	1.44838e+06	1.19177e+06	0	0	0	547724	0	0	0	0	0	0	356854	0	0	0	0	0	0	0	593366	0	0	1.24498e+06	0	0	0
	P98066	TSG6_HUMAN	Tumor necrosis factor-inducible gene 6 protein (Hyaluronate-binding protein) (TNF-stimulated gene 6 protein) (TSG-6) (Tumor necrosis factor alpha-induced protein 6) (TNF alpha-induced protein 6)	0	0	0	0	0	0	0	0	0	0	0	0	0	0	0	0	0	0	0	0	0	0	0	0	0	805922	0	0	0	2.49656e+06	2.08894e+06	0	0	0	0	0	0	0	511740	0	0
	Q14112	NID2_HUMAN	Nidogen-2 (NID-2) (Osteonidogen)	0	0	0	0	0	0	0	0	0	0	0	0	279387	252169	0	0	0	0	0	438438	0	0	843309	0	0	0	0	887603	553904	0	0	0	599201	0	0	0	0	2.08217e+06	0	0	0
	Q15818	NPTX1_HUMAN	Neuronal pentraxin-1 (NP1) (Neuronal pentraxin I) (NP-I)	0	0	0	0	0	0	0	0	0	0	0	0	0	0	0	0	0	0	0	0	0	0	0	0	0	0	0	0	0	0	0	736803	1.57606e+06	0	870417	380790	546891	1.89487e+06	0	0	0
	P22897	MRC1_HUMAN	Macrophage mannose receptor 1 (MMR) (C-type lectin domain family 13 member D) (C-type lectin domain family 13 member D-like) (Human mannose receptor) (hMR) (Macrophage mannose receptor 1-like protein 1) (CD antigen CD206)	0	0	0	0	0	0	0	0	0	0	0	0	0	0	0	702572	0	0	0	411725	330326	0	0	0	0	0	0	515753	578305	0	0	379477	977866	0	0	269865	194599	1.39952e+06	0	92807.9	182747
	P54725	RD23A_HUMAN	UV excision repair protein RAD23 homolog A (HR23A) (hHR23A)	0	0	0	0	0	0	182001	0	0	0	0	0	0	758797	2.5987e+06	2.03344e+06	0	0	0	470601	0	0	0	0	0	0	0	0	0	0	0	0	0	0	0	0	0	0	0	0	0
	P30530	UFO_HUMAN	Tyrosine-protein kinase receptor UFO (EC 2.7.10.1) (AXL oncogene)	0	0	0	0	0	0	0	0	0	0	0	0	0	0	0	0	0	0	0	0	0	0	0	363343	0	0	0	98757.8	0	0	0	1092320	1.68872e+06	0	785786	478862	397890	0	0	389194	767210
	Q92743	HTRA1_HUMAN	Serine protease HTRA1 (EC 3.4.21.-) (High-temperature requirement A serine peptidase 1) (L56) (Serine protease 11)	0	0	0	263942	0	0	0	0	0	0	0	0	0	0	0	492428	0	0	0	274559	0	0	0	0	0	0	232054	462464	635766	0	0	474585	803056	0	564344	145845	335119	718019	112389	246869	318606
	Q9P1F3	ABRAL_HUMAN	Costars family protein ABRACL (ABRA C-terminal-like protein)	0	0	0	0	0	0	0	0	0	0	0	0	0	0	0	0	0	0	0	0	762869	0	0	0	0	0	0	924479	0	0	0	0	149092	0	1.13157e+06	0	0	3.23057e+06	0	0	0
	P15153	RAC2_HUMAN	Ras-related C3 botulinum toxin substrate 2 (GX) (Small G protein) (p21-Rac2)	0	0	0	0	0	0	0	0	0	0	0	0	0	0	0	0	0	0	0	0	0	0	0	0	0	0	1.33674e+06	505900	0	0	0	0	0	0	0	0	0	4.43374e+06	0	0	0
	P30044	PRDX5_HUMAN	Peroxiredoxin-5, mitochondrial (EC 1.11.1.15) (Alu corepressor 1) (Antioxidant enzyme B166) (AOEB166) (Liver tissue 2D-page spot 71B) (PLP) (Peroxiredoxin V) (Prx-V) (Peroxisomal antioxidant enzyme) (TPx type VI) (Thioredoxin peroxidase PMP20) (Thioredoxin reductase)	0	0	0	0	0	0	0	0	0	0	0	0	0	0	0	0	0	0	0	495369	0	0	0	0	0	0	1.33747e+06	876452	0	720428	0	0	0	0	0	0	0	2.57173e+06	290971	0	0
	P11413	G6PD_HUMAN	Glucose-6-phosphate 1-dehydrogenase (G6PD) (EC 1.1.1.49)	0	0	0	142159	0	0	0	0	0	0	0	0	0	0	0	0	0	0	0	0	0	0	0	0	0	0	1.18015e+06	947246	0	0	0	0	0	0	737179	0	0	3.5133e+06	0	0	0
	O60888	CUTA_HUMAN	Protein CutA (Acetylcholinesterase-associated protein) (Brain acetylcholinesterase putative membrane anchor)	0	0	0	0	0	0	0	0	0	0	0	0	0	0	0	0	0	0	0	0	0	287428	0	385640	0	0	437583	0	0	0	0	662434	1.0529e+06	0	0	648714	965763	1.75803e+06	0	0	346158
	Q13231	CHIT1_HUMAN	Chitotriosidase-1 (EC 3.2.1.14) (Chitinase-1)	0	0	0	0	0	0	0	0	0	0	0	0	0	0	0	0	0	0	0	0	0	0	0	0	0	0	724796	953651	0	2.86343e+06	1.21402e+06	270064	0	0	0	0	0	0	557749	0	0
	P60900	PSA6_HUMAN	Proteasome subunit alpha type-6 (EC 3.4.25.1) (27 kDa prosomal protein) (PROS-27) (p27K) (Macropain iota chain) (Multicatalytic endopeptidase complex iota chain) (Proteasome iota chain)	0	0	0	292894	0	0	0	0	0	0	0	0	342112	0	1.19956e+06	894841	0	0	0	516161	0	0	0	0	0	0	410195	437879	0	0	0	433414	0	0	575757	0	0	1554218	0	0	0
	Q16555	DPYL2_HUMAN	Dihydropyrimidinase-related protein 2 (DRP-2) (Collapsin response mediator protein 2) (CRMP-2) (N2A3) (Unc-33-like phosphoprotein 2) (ULIP-2)	0	0	0	234445	0	0	0	0	0	0	0	0	0	0	0	0	0	0	0	0	0	0	0	0	0	564098	338487	0	0	0	911978	0	0	463550	2.02201e+06	0	0	709510	707328	365065	347044
	P41218	MNDA_HUMAN	Myeloid cell nuclear differentiation antigen	0	0	0	0	0	0	0	0	0	0	0	0	0	0	0	0	0	0	0	0	0	0	0	0	0	0	1.10865e+06	670370	0	0	0	422688	0	0	511300	0	0	3.97733e+06	0	0	0
	P39687	AN32A_HUMAN	Acidic leucine-rich nuclear phosphoprotein 32 family member A (Acidic nuclear phosphoprotein pp32) (pp32) (Leucine-rich acidic nuclear protein) (LANP) (Mapmodulin) (Potent heat-stable protein phosphatase 2A inhibitor I1PP2A) (Putative HLA-DR-associated protein I) (PHAPI)	0	0	0	0	0	0	0	0	0	0	0	0	0	0	0	0	0	0	0	0	0	0	0	0	0	0	1.07264e+06	1.21582e+06	0	0	0	0	0	0	0	0	0	4.40962e+06	0	0	0
	P35579	MYH9_HUMAN	Myosin-9 (Cellular myosin heavy chain, type A) (Myosin heavy chain 9) (Myosin heavy chain, non-muscle IIa) (Non-muscle myosin heavy chain A) (NMMHC-A) (Non-muscle myosin heavy chain IIa) (NMMHC II-a) (NMMHC-IIA)	0	0	0	0	0	0	0	0	0	0	0	0	0	0	0	454002	0	0	0	527825	256616	0	0	0	0	0	855584	682800	0	0	0	520493	0	0	663952	202784	0	2.44335e+06	0	0	147451
	P13639	EF2_HUMAN	Elongation factor 2 (EF-2)	0	0	0	442500	0	0	0	0	0	0	0	0	238027	190891	721639	789190	0	0	0	249626	0	0	0	0	0	0	386169	487114	0	0	0	0	0	0	595905	0	0	2.65412e+06	0	0	0
	P08238	HS90B_HUMAN	Heat shock protein HSP 90-beta (HSP 90) (Heat shock 84 kDa) (HSP 84) (HSP84)	0	0	0	795741	0	0	0	0	0	0	0	0	285435	0	0	1.0625e+06	0	0	0	913110	0	0	0	0	0	0	0	0	0	0	0	0	0	0	0	0	0	3.70721e+06	0	0	0
	Q9UK55	ZPI_HUMAN	Protein Z-dependent protease inhibitor (PZ-dependent protease inhibitor) (PZI) (Serpin A10)	0	0	0	0	0	0	0	0	0	0	0	0	0	0	0	0	0	0	0	0	0	0	1.14813e+06	0	0	590721	398303	0	0	582954	0	0	0	762266	893613	0	0	1.87232e+06	534571	0	0
	Q99969	RARR2_HUMAN	Retinoic acid receptor responder protein 2 (Chemerin) (RAR-responsive protein TIG2) (Tazarotene-induced gene 2 protein)	0	0	0	129428	0	0	0	0	0	0	0	0	0	0	0	0	0	0	0	0	0	0	0	304778	0	0	0	574488	1.0167e+06	0	0	803007	825927	0	499075	389882	401165	1.30975e+06	172454	133258	268526
	P34096	RNAS4_HUMAN	Ribonuclease 4 (RNase 4) (EC 3.1.27.-)	0	0	0	0	0	0	0	0	0	0	0	0	0	0	0	0	0	0	0	0	0	0	0	0	0	0	407485	490515	548642	0	0	701967	903029	720769	623997	0	418176	1.76295e+06	0	95625.2	185508
	P52790	HXK3_HUMAN	Hexokinase-3 (EC 2.7.1.1) (Hexokinase type III) (HK III)	0	0	0	339761	0	0	0	0	0	0	0	0	0	0	0	378043	0	0	0	288293	0	0	0	0	0	0	604861	750518	0	0	0	454491	0	0	386325	268568	0	3.43129e+06	0	0	0
	Q14767	LTBP2_HUMAN	Latent-transforming growth factor beta-binding protein 2 (LTBP-2)	0	0	0	412919	0	0	0	0	0	0	0	0	0	0	869976	1.12115e+06	0	0	0	467558	306588	0	0	0	0	232954	261781	704331	575344	0	0	268747	260829	0	331486	168373	0	947346	0	0	0
	P04080	CYTB_HUMAN	Cystatin-B (CPI-B) (Liver thiol proteinase inhibitor) (Stefin-B)	0	0	0	783677	0	0	0	0	0	0	0	0	487476	0	2.14383e+06	1.7026e+06	0	0	0	807698	630601	0	0	0	0	0	0	0	0	0	0	0	0	0	412984	0	0	0	0	0	0
	P07237	PDIA1_HUMAN	Protein disulfide-isomerase (PDI) (EC 5.3.4.1) (Cellular thyroid hormone-binding protein) (Prolyl 4-hydroxylase subunit beta) (p55)	0	0	0	695105	0	0	0	0	0	0	0	0	316268	0	769953	599960	0	0	0	513632	188829	0	144977	0	0	0	479300	311434	0	0	180149	269161	0	0	480834	0	0	1.94698e+06	74358.2	0	0
	Q99983	OMD_HUMAN	Osteomodulin (Keratan sulfate proteoglycan osteomodulin) (KSPG osteomodulin) (Osteoadherin) (OSAD)	0	0	0	0	0	0	0	0	0	0	0	0	0	0	0	0	0	0	0	0	0	0	0	0	0	0	0	0	0	0	0	0	1.61347e+06	0	0	504499	661536	4.1997e+06	0	0	0
	P52907	CAZA1_HUMAN	F-actin-capping protein subunit alpha-1 (CapZ alpha-1)	0	0	0	558139	0	0	0	0	0	0	0	0	0	0	0	0	0	0	0	0	0	0	0	0	0	0	1.29019e+06	1.39002e+06	0	0	0	0	0	0	843327	0	0	3.01901e+06	0	0	0
	O15143	ARC1B_HUMAN	Actin-related protein 2/3 complex subunit 1B (Arp2/3 complex 41 kDa subunit) (p41-ARC)	0	0	0	0	0	0	0	0	0	0	0	0	0	0	0	0	0	0	0	0	0	0	0	0	0	0	969434	1.0504e+06	0	0	0	421175	0	0	513657	0	0	4.21546e+06	0	0	0
	Q15084	PDIA6_HUMAN	Protein disulfide-isomerase A6 (EC 5.3.4.1) (Endoplasmic reticulum protein 5) (ER protein 5) (ERp5) (Protein disulfide isomerase P5) (Thioredoxin domain-containing protein 7)	0	0	0	1.03651e+06	0	0	0	0	0	0	0	0	0	505221	1.77175e+06	1.47806e+06	0	0	0	1.17235e+06	472566	0	0	0	0	0	0	0	0	0	0	0	0	0	0	0	0	823571	0	0	0
	P33241	LSP1_HUMAN	Lymphocyte-specific protein 1 (47 kDa actin-binding protein) (52 kDa phosphoprotein) (pp52) (Lymphocyte-specific antigen WP34)	0	0	0	0	0	0	0	0	0	0	0	0	0	0	0	0	0	0	0	381015	236151	0	0	0	0	0	974460	1.12937e+06	0	0	0	620660	0	0	1.43037e+06	343010	0	2.16659e+06	0	0	0
	P28799	GRN_HUMAN	Granulins (Proepithelin) (PEPI) [Cleaved into: Acrogranin (Glycoprotein of 88 Kda) (GP88) (Glycoprotein 88) (Progranulin); Paragranulin; Granulin-1 (Granulin G); Granulin-2 (Granulin F); Granulin-3 (Granulin B); Granulin-4 (Granulin A); Granulin-5 (Granulin C); Granulin-6 (Granulin D); Granulin-7 (Granulin E)]	0	0	0	0	0	0	0	0	0	0	0	0	0	0	0	0	0	0	0	0	0	0	0	0	0	0	603966	1.01178e+06	1.00138e+06	0	0	704007	588280	0	1.04052e+06	326838	0	1.36848e+06	0	255539	398764
	Q06323	PSME1_HUMAN	Proteasome activator complex subunit 1 (11S regulator complex subunit alpha) (REG-alpha) (Activator of multicatalytic protease subunit 1) (Interferon gamma up-regulated I-5111 protein) (IGUP I-5111) (Proteasome activator 28 subunit alpha) (PA28a) (PA28alpha)	0	0	0	0	0	0	0	0	0	0	0	0	0	493239	0	4.82088e+06	0	0	0	1.2666e+06	0	0	0	0	0	0	0	0	0	0	0	0	0	0	0	0	0	1.04936e+06	0	0	0
	O75083	WDR1_HUMAN	WD repeat-containing protein 1 (Actin-interacting protein 1) (AIP1) (NORI-1)	0	0	0	0	0	0	0	0	0	0	0	0	0	0	0	0	0	0	0	0	0	0	0	0	0	0	940805	1.21237e+06	0	0	0	659740	0	0	968774	0	0	3.85369e+06	0	0	0
	P07451	CAH3_HUMAN	Carbonic anhydrase 3 (EC 4.2.1.1) (Carbonate dehydratase III) (Carbonic anhydrase III) (CA-III)	0	0	0	0	0	0	0	0	0	0	0	0	1.42167e+06	1.24667e+06	2.24208e+06	2.75213e+06	0	0	0	0	0	0	0	0	0	0	0	0	0	0	0	0	0	0	0	0	0	0	0	0	0
	Q7Z7M0	MEGF8_HUMAN	Multiple epidermal growth factor-like domains protein 8 (Multiple EGF-like domains protein 8) (Epidermal growth factor-like protein 4) (EGF-like protein 4)	0	0	0	0	0	0	0	0	0	0	0	0	0	0	0	0	0	0	0	0	0	0	0	0	0	0	0	170218	0	0	0	883528	1.49009e+06	0	458686	195562	231032	3.77321e+06	0	0	492271
	Q9BY67	CADM1_HUMAN	Cell adhesion molecule 1 (Immunoglobulin superfamily member 4) (IgSF4) (Nectin-like protein 2) (NECL-2) (Spermatogenic immunoglobulin superfamily) (SgIgSF) (Synaptic cell adhesion molecule) (SynCAM) (Tumor suppressor in lung cancer 1) (TSLC-1)	0	0	0	0	0	0	0	0	0	0	0	0	0	0	0	0	0	0	0	0	0	0	0	0	0	0	0	0	0	0	0	890373	2.58804e+06	0	964060	618484	510251	2.12592e+06	0	0	0
	P21333	FLNA_HUMAN	Filamin-A (FLN-A) (Actin-binding protein 280) (ABP-280) (Alpha-filamin) (Endothelial actin-binding protein) (Filamin-1) (Non-muscle filamin)	0	0	0	218486	289344	0	0	0	0	0	0	0	0	289955	588129	635991	0	0	0	422480	260151	0	0	0	0	0	690900	693660	0	451999	0	442576	0	0	679364	236917	0	1.79777e+06	0	0	0
	P14543	NID1_HUMAN	Nidogen-1 (NID-1) (Entactin)	0	0	0	224712	0	0	0	0	0	0	0	0	308399	274168	877393	687283	0	0	0	304091	177269	0	349827	0	0	0	251487	562661	335469	0	0	338772	534787	80908.9	487404	286017	281024	1.35286e+06	0	0	0
	P61158	ARP3_HUMAN	Actin-related protein 3 (Actin-like protein 3)	0	0	0	0	0	0	0	0	0	0	0	0	0	0	0	0	0	0	0	0	0	0	0	0	0	0	1.22443e+06	1.2558e+06	0	0	0	290521	0	0	638956	227950	0	4.08289e+06	0	0	0
	P47756	CAPZB_HUMAN	F-actin-capping protein subunit beta (CapZ beta)	0	0	0	222068	0	0	0	0	0	0	0	0	0	0	0	0	0	0	0	504616	0	0	0	0	0	0	1.15213e+06	1.35641e+06	0	0	0	0	0	0	1.54202e+06	0	0	2.97435e+06	0	0	0
	P11277	SPTB1_HUMAN	Spectrin beta chain, erythrocytic (Beta-I spectrin)	0	0	0	567225	0	0	414605	0	0	0	0	0	938904	890950	2.67591e+06	1.99296e+06	0	0	0	357469	0	0	0	0	0	0	0	0	0	0	0	0	0	0	0	0	0	0	0	0	0
	P28676	GRAN_HUMAN	Grancalcin	0	0	0	0	0	0	0	0	0	0	0	0	0	0	0	0	0	0	0	527935	0	0	0	0	0	0	829186	1.41912e+06	0	0	0	665201	0	0	545613	164263	0	3.70089e+06	0	0	0
	P12724	ECP_HUMAN	Eosinophil cationic protein (ECP) (EC 3.1.27.-) (Ribonuclease 3) (RNase 3)	0	0	0	0	0	0	0	0	0	0	0	0	0	0	0	0	0	0	0	0	0	0	0	0	0	0	2.03677e+06	2.86113e+06	1.04689e+06	0	0	0	0	0	0	0	0	1.4962e+06	514920	0	0
	P04275	VWF_HUMAN	von Willebrand factor (vWF) [Cleaved into: von Willebrand antigen 2 (von Willebrand antigen II)]	340127	0	0	0	0	0	0	0	0	0	0	0	0	0	0	0	0	0	0	0	0	0	1.1495e+06	0	0	796643	273535	299523	0	1.47751e+06	1.00823e+06	0	0	725320	808949	0	0	694776	402013	0	0
	O14773	TPP1_HUMAN	Tripeptidyl-peptidase 1 (TPP-1) (EC 3.4.14.9) (Cell growth-inhibiting gene 1 protein) (Lysosomal pepstatin-insensitive protease) (LPIC) (Tripeptidyl aminopeptidase) (Tripeptidyl-peptidase I) (TPP-I)	0	0	0	0	0	0	0	0	0	0	0	0	0	0	0	0	0	0	0	262907	0	245509	0	507156	363520	0	324023	504589	521311	0	783306	854957	323212	0	592342	191410	226249	1.0166e+06	388710	408873	468296
	Q8NBJ4	GOLM1_HUMAN	Golgi membrane protein 1 (Golgi membrane protein GP73) (Golgi phosphoprotein 2)	0	0	0	0	0	0	0	0	0	0	0	0	0	0	455205	784632	0	0	0	0	237050	0	0	258738	0	0	255459	397250	486626	0	0	774021	914421	210909	598907	320594	337475	1.38695e+06	0	250527	380231
	P04083	ANXA1_HUMAN	Annexin A1 (Annexin I) (Annexin-1) (Calpactin II) (Calpactin-2) (Chromobindin-9) (Lipocortin I) (Phospholipase A2 inhibitory protein) (p35)	0	0	0	0	0	0	0	0	0	0	0	0	189890	0	0	715879	0	0	0	281762	0	0	0	0	0	0	1.53711e+06	1.47797e+06	0	0	0	867658	0	0	1.16585e+06	0	0	1.8465e+06	0	0	0
	P11215	ITAM_HUMAN	Integrin alpha-M (CD11 antigen-like family member B) (CR-3 alpha chain) (Cell surface glycoprotein MAC-1 subunit alpha) (Leukocyte adhesion receptor MO1) (Neutrophil adherence receptor) (CD antigen CD11b)	0	0	0	334766	0	0	0	0	0	0	0	0	0	0	0	0	0	0	0	0	0	0	450479	0	0	350508	382304	288092	0	1.69632e+06	872106	0	0	605072	658251	0	0	1.94854e+06	511042	0	0
	Q06481	APLP2_HUMAN	Amyloid-like protein 2 (APLP-2) (APPH) (Amyloid protein homolog) (CDEI box-binding protein) (CDEBP)	0	0	0	0	0	0	0	0	0	0	0	0	0	0	0	0	0	0	0	0	0	0	0	0	0	0	0	0	0	0	0	1.25019e+06	2.67754e+06	170692	0	965954	455600	2.15094e+06	526586	0	0
	Q13740	CD166_HUMAN	CD166 antigen (Activated leukocyte cell adhesion molecule) (CD antigen CD166)	0	0	0	0	0	0	0	0	0	0	0	0	0	0	0	0	0	0	0	0	0	0	1.57071e+06	0	0	0	0	1.03585e+06	263029	0	177094	1.22938e+06	886801	0	429822	417634	787877	1.56337e+06	0	0	161653
	O94856	NFASC_HUMAN	Neurofascin	0	0	0	0	0	0	0	0	0	0	0	0	0	3.35497e+06	0	0	0	0	0	0	0	0	0	0	0	0	0	0	0	0	0	478383	1.10519e+06	0	766559	384419	320252	2.02417e+06	0	0	212803
	P37802	TAGL2_HUMAN	Transgelin-2 (Epididymis tissue protein Li 7e) (SM22-alpha homolog)	0	0	0	0	327444	0	0	0	0	0	0	0	0	0	1.71169e+06	0	0	0	0	1.03686e+06	0	0	0	0	0	0	701778	924801	0	0	0	0	0	0	1.18075e+06	0	0	2889120	0	0	0
	O60234	GMFG_HUMAN	Glia maturation factor gamma (GMF-gamma)	0	0	0	0	0	0	0	0	0	0	0	0	0	0	0	0	0	0	0	0	0	0	0	0	0	0	1.18165e+06	1.19909e+06	0	0	0	558384	0	0	922898	0	0	5.03224e+06	0	0	0
	P23381	SYWC_HUMAN	Tryptophan--tRNA ligase, cytoplasmic (EC 6.1.1.2) (Interferon-induced protein 53) (IFP53) (Tryptophanyl-tRNA synthetase) (TrpRS) (hWRS) [Cleaved into: T1-TrpRS; T2-TrpRS]	0	0	0	352694	0	0	0	0	0	0	0	0	479973	410137	1.33341e+06	1.28225e+06	0	0	0	491968	0	0	0	0	0	0	698327	0	0	0	0	481874	0	0	0	0	0	3.40108e+06	0	0	0
	Q06828	FMOD_HUMAN	Fibromodulin (FM) (Collagen-binding 59 kDa protein) (Keratan sulfate proteoglycan fibromodulin) (KSPG fibromodulin)	0	0	0	0	0	0	0	0	0	0	0	0	0	0	1.29005e+06	1441515	0	0	0	554990	337206	0	0	0	0	0	0	0	0	0	0	0	694699	0	0	0	483119	4.14319e+06	0	0	0
	P20700	LMNB1_HUMAN	Lamin-B1	0	0	0	0	0	0	0	0	0	0	0	0	0	0	0	0	0	0	0	0	0	0	0	0	0	0	624886	338885	0	0	0	0	0	0	459159	0	0	7.56649e+06	0	0	0
	P23471	PTPRZ_HUMAN	Receptor-type tyrosine-protein phosphatase zeta (R-PTP-zeta) (EC 3.1.3.48) (Protein-tyrosine phosphatase receptor type Z polypeptide 1) (Protein-tyrosine phosphatase receptor type Z polypeptide 2) (R-PTP-zeta-2)	0	0	0	0	0	0	0	0	0	0	0	0	0	0	0	0	0	0	0	0	0	194586	0	496459	160444	0	225251	325198	467921	0	0	1.1279e+06	1.57207e+06	0	1.44133e+06	567655	585850	371300	394775	391088	670151
	Q7Z3B1	NEGR1_HUMAN	Neuronal growth regulator 1 (IgLON family member 4)	0	0	0	0	0	0	0	0	0	0	0	0	0	0	0	0	0	0	0	0	0	0	0	0	0	0	0	0	0	0	0	1.34534e+06	2.84405e+06	0	935903	594922	1.01425e+06	2.14412e+06	0	163044	0
	P22105	TENX_HUMAN	Tenascin-X (TN-X) (Hexabrachion-like protein)	0	0	0	466601	0	0	0	0	0	0	0	0	0	0	180504	347941	0	0	0	186180	0	0	1.44052e+06	0	0	267149	482919	509097	0	1.06323e+06	599947	0	423102	489904	419984	0	178468	1.86555e+06	143714	0	0
	Q9Y490	TLN1_HUMAN	Talin-1	0	0	0	0	0	0	0	0	0	0	0	0	0	0	0	0	0	0	0	248190	0	0	0	0	0	0	397191	462536	1.78342e+06	0	0	1.9282e+06	0	0	1.24939e+06	849305	0	2.1907e+06	0	0	0
	P17174	AATC_HUMAN	Aspartate aminotransferase, cytoplasmic (cAspAT) (EC 2.6.1.1) (EC 2.6.1.3) (Cysteine aminotransferase, cytoplasmic) (Cysteine transaminase, cytoplasmic) (cCAT) (Glutamate oxaloacetate transaminase 1) (Transaminase A)	0	0	0	693682	0	0	0	0	0	0	0	0	607373	581399	1.94196e+06	1.6528e+06	0	0	0	612612	425117	0	0	0	0	0	0	0	0	0	0	0	422017	0	720258	0	277134	1.2907e+06	0	0	0
	P60660	MYL6_HUMAN	Myosin light polypeptide 6 (17 kDa myosin light chain) (LC17) (Myosin light chain 3) (MLC-3) (Myosin light chain alkali 3) (Myosin light chain A3) (Smooth muscle and nonmuscle myosin light chain alkali 6)	0	0	0	0	0	0	0	0	0	0	0	0	0	0	0	0	0	0	0	633714	0	0	0	0	0	0	1.63831e+06	1.43829e+06	0	0	0	761343	0	0	965932	0	0	3.80432e+06	0	0	0
	P12111	CO6A3_HUMAN	Collagen alpha-3(VI) chain	0	0	0	0	0	0	0	0	0	0	0	0	0	0	683588	702294	0	0	0	0	0	0	943290	0	0	350556	434235	762462	863016	1.00284e+06	0	0	845487	0	542400	852455	195230	1.31198e+06	0	0	0
	P21246	PTN_HUMAN	Pleiotrophin (PTN) (Heparin-binding brain mitogen) (HBBM) (Heparin-binding growth factor 8) (HBGF-8) (Heparin-binding growth-associated molecule) (HB-GAM) (Heparin-binding neurite outgrowth-promoting factor 1) (HBNF-1) (Osteoblast-specific factor 1) (OSF-1)	0	0	0	0	0	0	0	0	0	0	0	0	0	0	0	0	0	0	0	0	0	0	2.2422e+06	0	0	0	0	971797	1.40194e+06	0	0	0	1.63388e+06	0	0	0	0	3.59646e+06	0	0	0
	P13473	LAMP2_HUMAN	Lysosome-associated membrane glycoprotein 2 (LAMP-2) (Lysosome-associated membrane protein 2) (CD107 antigen-like family member B) (CD antigen CD107b)	439327	0	0	1.05308e+06	0	0	0	0	0	0	0	222505	0	634294	1.75491e+06	0	364110	205732	0	910555	671109	397147	0	0	0	0	0	0	0	0	0	0	744793	772157	0	0	1.1336e+06	0	548473	0	0
	O43707	ACTN4_HUMAN	Alpha-actinin-4 (Non-muscle alpha-actinin 4)	0	0	0	0	0	0	0	0	0	0	0	0	0	0	0	0	0	0	0	0	0	0	0	0	0	0	687347	594769	0	0	0	332627	0	0	914181	0	0	7.32504e+06	0	0	0
	Q8N126	CADM3_HUMAN	Cell adhesion molecule 3 (Brain immunoglobulin receptor) (Immunoglobulin superfamily member 4B) (IgSF4B) (Nectin-like protein 1) (NECL-1) (Synaptic cell adhesion molecule 3) (SynCAM3) (TSLC1-like protein 1) (TSLL1)	0	0	0	0	0	0	0	0	0	0	0	0	0	0	0	0	0	0	0	286257	0	0	1.10844e+06	0	0	0	0	0	914152	0	0	1.59765e+06	1.61674e+06	0	784045	615126	642364	2.11208e+06	0	0	226006
	P02730	B3AT_HUMAN	Band 3 anion transport protein (Anion exchange protein 1) (AE 1) (Anion exchanger 1) (Solute carrier family 4 member 1) (CD antigen CD233)	0	0	0	696207	0	0	0	0	0	410654	0	0	0	884170	2.7919e+06	2.5147e+06	0	0	0	926424	765563	0	0	0	0	0	0	0	0	0	0	0	0	0	993835	0	0	0	0	0	0
	P04066	FUCO_HUMAN	Tissue alpha-L-fucosidase (EC 3.2.1.51) (Alpha-L-fucosidase I) (Alpha-L-fucoside fucohydrolase 1) (Alpha-L-fucosidase 1)	0	0	0	0	0	0	0	0	0	0	0	0	0	0	0	0	0	0	0	0	0	0	0	0	0	0	0	0	0	0	262276	599559	886058	0	592830	1.19395e+06	261517	6.05377e+06	0	0	161741
	O15394	NCAM2_HUMAN	Neural cell adhesion molecule 2 (N-CAM-2) (NCAM-2)	0	0	0	0	0	0	0	0	0	0	0	0	0	0	0	272326	0	0	0	0	164048	0	441425	166085	134755	0	323213	577163	594315	0	0	748523	1.93923e+06	204684	826233	365860	504709	2.07095e+06	0	296247	453789
	Q6EMK4	VASN_HUMAN	Vasorin (Protein slit-like 2)	0	0	0	0	0	0	0	0	0	0	0	0	0	0	0	0	0	0	0	0	0	0	1.03594e+06	0	0	0	499722	727671	741159	0	432242	844078	1.44673e+06	325878	845926	359369	230588	2.40414e+06	0	0	257786
	P17936	IBP3_HUMAN	Insulin-like growth factor-binding protein 3 (IBP-3) (IGF-binding protein 3) (IGFBP-3)	0	0	0	411031	0	0	0	0	0	0	0	0	0	0	0	525620	0	0	0	371954	0	0	1.02524e+06	0	0	1.3601e+06	1.12949e+06	1.16633e+06	1.22698e+06	0	0	507243	0	0	0	0	0	2.47894e+06	0	0	0
	P00352	AL1A1_HUMAN	Retinal dehydrogenase 1 (RALDH 1) (RalDH1) (EC 1.2.1.36) (ALDH-E1) (ALHDII) (Aldehyde dehydrogenase family 1 member A1) (Aldehyde dehydrogenase, cytosolic)	0	0	0	986209	0	0	0	0	0	0	0	654784	1.14901e+06	1.12895e+06	2.70656e+06	2.4385e+06	0	0	0	619566	588181	0	0	0	0	0	0	0	0	0	0	0	0	0	0	0	0	0	0	0	0
	P52565	GDIR1_HUMAN	Rho GDP-dissociation inhibitor 1 (Rho GDI 1) (Rho-GDI alpha)	0	0	0	0	0	0	0	0	0	0	0	0	0	0	0	1.17479e+06	0	0	0	655228	0	0	0	0	0	238805	908950	1.03295e+06	0	0	0	570455	0	0	1.11937e+06	195956	0	4.0077e+06	256313	0	114629
	P32320	CDD_HUMAN	Cytidine deaminase (EC 3.5.4.5) (Cytidine aminohydrolase)	0	0	0	0	0	0	0	0	0	0	0	0	0	0	0	0	0	0	0	0	0	0	0	0	0	0	1.3389e+06	1.99667e+06	868574	0	0	1.04894e+06	0	0	2.36657e+06	721336	0	1.93789e+06	0	0	0
	Q14982	OPCM_HUMAN	Opioid-binding protein/cell adhesion molecule (OBCAM) (OPCML) (Opioid-binding cell adhesion molecule) (IgLON family member 1)	0	0	0	0	0	0	0	0	0	0	0	0	238596	0	354348	0	0	0	0	929206	120804	0	0	0	0	0	0	0	0	0	0	1.21152e+06	2.88577e+06	0	1.45784e+06	970654	472090	1669650	0	0	0
	P03973	SLPI_HUMAN	Antileukoproteinase (ALP) (BLPI) (HUSI-1) (Mucus proteinase inhibitor) (MPI) (Protease inhibitor WAP4) (Secretory leukocyte protease inhibitor) (Seminal proteinase inhibitor) (WAP four-disulfide core domain protein 4)	0	0	0	0	0	0	0	0	0	0	0	0	0	0	0	0	0	0	0	0	0	0	0	0	0	0	923711	1396356	0	0	0	0	0	776168	0	0	280261	5.92832e+06	663042	0	422560
	O94919	ENDD1_HUMAN	Endonuclease domain-containing 1 protein (EC 3.1.30.-)	0	0	0	463223	0	0	0	0	0	0	0	0	0	0	393309	320492	0	0	0	281316	228811	0	0	158457	0	0	377603	492544	653928	0	0	996210	1.33779e+06	0	1.19593e+06	377144	380668	1.89046e+06	0	234234	634794
	P40121	CAPG_HUMAN	Macrophage-capping protein (Actin regulatory protein CAP-G)	0	0	0	646185	0	0	0	0	0	0	0	0	295156	346403	1.2059e+06	876482	0	0	0	649351	449747	0	0	0	0	0	969204	1.08749e+06	0	0	0	554845	0	0	1.04696e+06	519795	0	1.78672e+06	0	0	0
	Q96S96	PEBP4_HUMAN	Phosphatidylethanolamine-binding protein 4 (PEBP-4) (hPEBP4) (Protein cousin-of-RKIP 1)	0	0	0	0	0	0	0	0	0	0	0	0	0	0	0	0	0	0	0	0	0	0	327830	532095	0	0	0	0	867902	501096	854427	1.5904e+06	2.77889e+06	0	0	0	649864	1.56067e+06	0	286872	554474
	P05160	F13B_HUMAN	Coagulation factor XIII B chain (Fibrin-stabilizing factor B subunit) (Protein-glutamine gamma-glutamyltransferase B chain) (Transglutaminase B chain)	442148	0	0	0	0	0	0	0	0	0	0	0	0	0	0	0	0	0	0	0	0	0	1.23785e+06	0	0	1.31015e+06	663454	594851	665739	1.50328e+06	1.26084e+06	0	265878	396601	666311	223017	0	1.20648e+06	234546	0	0
	Q02246	CNTN2_HUMAN	Contactin-2 (Axonal glycoprotein TAG-1) (Axonin-1) (Transient axonal glycoprotein 1) (TAX-1)	0	0	0	391662	0	0	0	0	0	0	0	0	0	0	0	0	0	0	0	248874	271640	169861	565261	286660	243528	321798	502069	826503	1.05869e+06	0	0	773064	1.1671e+06	0	576886	244092	469985	1.79294e+06	0	228304	574528
	Q14692	BMS1_HUMAN	Ribosome biogenesis protein BMS1 homolog (Ribosome assembly protein BMS1 homolog)	0	0	0	0	0	0	0	0	0	0	0	0	0	0	0	0	0	0	0	0	0	0	0	0	0	0	0	1.84909e+06	0	0	0	3.66523e+06	0	0	0	3.77857e+06	0	0	1.12858e+06	0	379398
	Q9UBX5	FBLN5_HUMAN	Fibulin-5 (FIBL-5) (Developmental arteries and neural crest EGF-like protein) (Dance) (Urine p50 protein) (UP50)	0	0	0	0	0	0	0	0	0	0	0	0	0	0	0	1031823	0	0	0	0	0	0	900590	0	0	0	736720	949300	840738	0	0	636476	2.12727e+06	0	504082	0	612645	2.51329e+06	0	0	0
	Q15904	VAS1_HUMAN	V-type proton ATPase subunit S1 (V-ATPase subunit S1) (Protein XAP-3) (V-ATPase Ac45 subunit) (V-ATPase S1 accessory protein) (Vacuolar proton pump subunit S1)	0	0	0	641474	0	0	0	0	0	0	0	0	0	0	1.94361e+06	0	0	0	0	509678	0	0	0	0	0	0	338314	833720	0	0	0	554198	1.06658e+06	0	0	195608	392061	3.98304e+06	0	438731	0
	P30101	PDIA3_HUMAN	Protein disulfide-isomerase A3 (EC 5.3.4.1) (58 kDa glucose-regulated protein) (58 kDa microsomal protein) (p58) (Disulfide isomerase ER-60) (Endoplasmic reticulum resident protein 57) (ER protein 57) (ERp57) (Endoplasmic reticulum resident protein 60) (ER protein 60) (ERp60)	0	0	0	1.22983e+06	0	0	0	0	0	0	0	0	389553	527227	1.44613e+06	1.64851e+06	0	0	0	956072	331043	0	0	0	0	0	1.09567e+06	0	0	0	0	350735	0	0	778495	0	0	2.17153e+06	0	0	0
	P12814	ACTN1_HUMAN	Alpha-actinin-1 (Alpha-actinin cytoskeletal isoform) (F-actin cross-linking protein) (Non-muscle alpha-actinin-1)	0	0	0	0	0	0	0	0	0	0	0	0	0	0	0	0	0	0	0	287063	0	0	0	0	0	0	1.07262e+06	1.24443e+06	0	0	0	647801	2.33055e+06	0	1.31158e+06	1.13272e+06	0	2.92011e+06	0	0	0
	P80108	PHLD_HUMAN	Phosphatidylinositol-glycan-specific phospholipase D (PI-G PLD) (EC 3.1.4.50) (Glycoprotein phospholipase D) (Glycosyl-phosphatidylinositol-specific phospholipase D) (GPI-PLD) (GPI-specific phospholipase D)	516615	0	0	0	0	0	0	0	0	0	0	0	0	0	0	0	0	0	0	0	0	0	2.02979e+06	0	0	1.67849e+06	673274	742335	768721	1.39766e+06	1.24799e+06	0	528015	620497	581736	0	0	0	287536	0	0
	P13489	RINI_HUMAN	Ribonuclease inhibitor (Placental ribonuclease inhibitor) (Placental RNase inhibitor) (Ribonuclease/angiogenin inhibitor 1) (RAI)	0	0	0	543712	0	0	0	0	0	0	0	0	499966	343112	1.32022e+06	1096262	0	0	0	691502	310334	0	0	0	0	0	673923	674069	125004	0	0	287757	0	0	626784	213725	0	3.8771e+06	0	0	0
	Q9NZD4	AHSP_HUMAN	Alpha-hemoglobin-stabilizing protein (Erythroid differentiation-related factor) (Erythroid-associated factor)	0	0	0	484458	0	0	388718	0	0	0	0	0	584045	565683	1.93668e+06	1.42695e+06	0	0	0	314412	0	0	0	0	0	0	0	0	2.47492e+06	0	0	0	0	0	0	3.36396e+06	0	0	0	0	0
	O94772	LY6H_HUMAN	Lymphocyte antigen 6H (Ly-6H)	0	0	0	0	0	0	0	0	0	0	0	0	0	0	0	0	0	0	0	0	0	0	0	185527	0	0	488895	646418	620323	0	0	1.17049e+06	3.76362e+06	0	1.58873e+06	749325	501962	1.30255e+06	0	340946	408225
	O75144	ICOSL_HUMAN	ICOS ligand (B7 homolog 2) (B7-H2) (B7-like protein Gl50) (B7-related protein 1) (B7RP-1) (CD antigen CD275)	0	0	0	0	0	0	0	0	0	0	0	0	0	0	0	0	0	0	0	0	0	0	0	0	0	285092	405746	719170	1.17911e+06	190789	440437	1.02762e+06	1.95541e+06	246788	1.10035e+06	666021	392507	2.74743e+06	0	0	423943
	P49908	SEPP1_HUMAN	Selenoprotein P (SeP)	0	0	0	0	0	0	0	0	0	0	0	0	0	0	0	0	0	0	0	0	0	0	756416	0	0	2.33136e+06	740021	975620	1.96987e+06	1.45026e+06	676956	738656	1.74478e+06	427726	0	0	0	0	0	0	0
	P19320	VCAM1_HUMAN	Vascular cell adhesion protein 1 (V-CAM 1) (VCAM-1) (INCAM-100) (CD antigen CD106)	0	0	0	407931	0	0	0	0	0	0	0	0	430285	266607	733719	789264	0	0	0	452792	220537	0	938750	0	0	286871	760780	1.1717e+06	728866	0	0	343427	809224	0	750243	250484	0	2.33813e+06	169303	0	0
	O75711	SCRG1_HUMAN	Scrapie-responsive protein 1 (Scrapie-responsive gene 1 protein) (ScRG-1)	0	0	0	0	0	0	0	0	0	0	0	0	0	0	0	0	0	0	0	0	0	0	0	0	0	429784	552641	994872	1.27223e+06	0	505714	1.60262e+06	2.16052e+06	0	0	526143	439097	2.80773e+06	0	0	593394
	P07108	ACBP_HUMAN	Acyl-CoA-binding protein (ACBP) (Diazepam-binding inhibitor) (DBI) (Endozepine) (EP)	0	0	0	1.30084e+06	0	0	0	0	0	0	0	0	0	0	0	0	0	0	0	1.05549e+06	762965	164901	0	0	0	0	697576	756617	0	0	713544	632670	595649	0	2.41259e+06	576953	0	1.92742e+06	296235	0	0
	P33908	MA1A1_HUMAN	Mannosyl-oligosaccharide 1,2-alpha-mannosidase IA (EC 3.2.1.113) (Man(9)-alpha-mannosidase) (Man9-mannosidase) (Mannosidase alpha class 1A member 1) (Processing alpha-1,2-mannosidase IA) (Alpha-1,2-mannosidase IA)	0	0	0	0	0	0	0	0	0	0	0	0	0	0	0	0	0	0	0	0	0	0	821272	0	0	0	575246	987501	821297	1.01872e+06	709898	746136	1.34044e+06	244631	781242	437888	388497	2.83427e+06	275023	0	0
	P26583	HMGB2_HUMAN	High mobility group protein B2 (High mobility group protein 2) (HMG-2)	0	0	0	0	0	0	0	0	0	0	0	0	0	0	0	0	0	0	0	0	0	0	0	0	0	0	1.56692e+06	1.60158e+06	0	0	0	727561	0	0	1.95419e+06	0	0	6.42442e+06	0	0	0
	P00491	PNPH_HUMAN	Purine nucleoside phosphorylase (PNP) (EC 2.4.2.1) (Inosine phosphorylase) (Inosine-guanosine phosphorylase)	0	0	0	614462	0	0	737876	0	0	0	0	313796	0	769288	774160	611519	0	0	0	643761	447840	0	0	0	0	0	1.14473e+06	1.32836e+06	265797	0	0	519761	0	0	924847	202230	0	3.0783e+06	0	0	0
	P02686	MBP_HUMAN	Myelin basic protein (MBP) (Myelin A1 protein) (Myelin membrane encephalitogenic protein)	0	0	0	0	0	0	0	0	0	0	0	0	0	0	0	0	0	0	0	0	0	0	0	0	0	0	0	0	0	0	0	571636	0	0	4.80962e+06	1.22116e+06	0	0	0	1.81071e+06	4.15264e+06
	P09429	HMGB1_HUMAN	High mobility group protein B1 (High mobility group protein 1) (HMG-1)	0	0	0	0	0	0	0	0	0	0	0	0	0	0	0	0	0	0	0	0	0	0	0	0	0	0	1.77143e+06	1.04686e+06	0	0	0	700290	0	0	819170	0	0	8.35126e+06	0	0	0
	P11142	HSP7C_HUMAN	Heat shock cognate 71 kDa protein (Heat shock 70 kDa protein 8) (Lipopolysaccharide-associated protein 1) (LAP-1) (LPS-associated protein 1)	0	0	0	765592	0	0	0	0	0	0	0	0	335116	288655	1.4283e+06	1.06335e+06	0	0	0	706416	442305	0	0	0	0	0	851936	906469	0	0	0	637841	0	0	1.29103e+06	0	0	3.83589e+06	186725	0	0
	Q9P121	NTRI_HUMAN	Neurotrimin (hNT) (IgLON family member 2)	0	0	0	0	0	0	0	0	0	0	0	0	0	0	0	0	0	0	0	106714	0	0	0	427012	0	0	0	580492	0	0	0	1.38395e+06	3.16839e+06	0	1.73289e+06	1.02743e+06	415348	3.2288e+06	0	322090	411114
	P35908	K22E_HUMAN	Keratin, type II cytoskeletal 2 epidermal (Cytokeratin-2e) (CK-2e) (Epithelial keratin-2e) (Keratin-2 epidermis) (Keratin-2e) (K2e) (Type-II keratin Kb2)	0	0	0	668082	0	0	0	0	0	0	0	797939	0	0	1.01682e+06	0	0	326044	0	0	0	1.21574e+06	0	340591	1.04471e+06	1.83972e+06	0	0	487801	685249	245883	0	607764	786171	0	610304	1.31703e+06	0	534429	0	301207
	P54108	CRIS3_HUMAN	Cysteine-rich secretory protein 3 (CRISP-3) (Specific granule protein of 28 kDa) (SGP28)	0	0	0	0	0	0	0	0	0	0	0	0	0	0	0	0	0	0	0	0	0	0	867872	0	0	2.2076e+06	623810	945709	0	3.46125e+06	923522	227350	0	1.06197e+06	1.25067e+06	347181	0	0	962837	0	0
	P61981	1433G_HUMAN	14-3-3 protein gamma (Protein kinase C inhibitor protein 1) (KCIP-1) [Cleaved into: 14-3-3 protein gamma, N-terminally processed]	0	0	0	763833	0	0	0	0	0	0	0	0	0	343291	0	1290243	0	0	0	612026	279219	116917	0	0	0	405864	629629	720210	0	659216	350770	863850	0	0	1.4511e+06	563507	0	2.68401e+06	529777	217960	502770
	P20742	PZP_HUMAN	Pregnancy zone protein (C3 and PZP-like alpha-2-macroglobulin domain-containing protein 6)	0	0	0	0	0	0	0	0	0	0	0	0	0	0	0	0	0	0	0	0	0	0	0	0	0	975816	711449	1.01988e+06	0	1.61739e+06	1.56541e+06	0	593335	293411	5.4332e+06	0	0	948793	0	0	0
	P20851	C4BPB_HUMAN	C4b-binding protein beta chain	0	0	0	0	0	0	0	0	0	0	0	0	0	0	0	0	0	0	0	0	0	0	1.86547e+06	0	0	1.5399e+06	757618	649447	0	2.93342e+06	2.64125e+06	0	0	1.26272e+06	1.07655e+06	0	0	0	653443	0	0
	P07996	TSP1_HUMAN	Thrombospondin-1	0	0	0	0	626503	0	0	0	0	0	0	0	0	0	0	0	0	0	0	0	0	0	1.13185e+06	0	0	394760	459538	434957	0	1.30115e+06	369661	478282	0	758620	1.83821e+06	513739	0	4.78875e+06	340891	0	0
	Q8NFZ8	CADM4_HUMAN	Cell adhesion molecule 4 (Immunoglobulin superfamily member 4C) (IgSF4C) (Nectin-like protein 4) (NECL-4) (TSLC1-like protein 2)	0	0	0	207076	0	0	0	0	0	0	0	0	0	0	0	446200	0	0	0	287486	228514	271919	727903	301168	249267	0	490072	617762	579169	0	0	935155	1.9424e+06	469813	1.49722e+06	618875	655362	1.87845e+06	356296	289066	522286
	P20160	CAP7_HUMAN	Azurocidin (Cationic antimicrobial protein CAP37) (Heparin-binding protein) (HBP) (hHBP)	0	0	0	2.41972e+06	0	0	0	0	0	0	0	0	0	0	0	0	0	0	0	0	0	0	0	0	0	0	0	910893	1.04355e+06	3.26053e+06	0	815192	0	0	0	0	0	1.48676e+06	3.75916e+06	0	0
	P02549	SPTA1_HUMAN	Spectrin alpha chain, erythrocytic 1 (Erythroid alpha-spectrin)	1.93883e+06	0	0	1.54021e+06	0	0	314989	0	0	0	0	366644	559005	675949	1814253	1.78893e+06	0	0	0	764349	545670	0	0	0	0	0	2.95497e+06	0	0	0	0	0	0	0	0	0	0	0	0	0	442439
	P53634	CATC_HUMAN	Dipeptidyl peptidase 1 (EC 3.4.14.1) (Cathepsin C) (Cathepsin J) (Dipeptidyl peptidase I) (DPP-I) (DPPI) (Dipeptidyl transferase) [Cleaved into: Dipeptidyl peptidase 1 exclusion domain chain (Dipeptidyl peptidase I exclusion domain chain); Dipeptidyl peptidase 1 heavy chain (Dipeptidyl peptidase I heavy chain); Dipeptidyl peptidase 1 light chain (Dipeptidyl peptidase I light chain)]	0	0	0	952206	0	0	0	0	0	0	0	0	0	0	1.17228e+06	1.09292e+06	0	0	0	1.01589e+06	625375	0	0	0	0	0	940641	1.85215e+06	0	0	0	0	0	0	812336	0	0	4.92051e+06	0	364370	0
	P00492	HPRT_HUMAN	Hypoxanthine-guanine phosphoribosyltransferase (HGPRT) (HGPRTase) (EC 2.4.2.8)	0	0	0	1.32421e+06	0	0	0	0	0	0	0	305937	1.05118e+06	1.17071e+06	4.38646e+06	2.81474e+06	0	0	0	944553	490549	0	0	0	0	0	274218	361359	0	0	0	0	0	0	715227	0	0	0	0	0	0
	Q9NQ79	CRAC1_HUMAN	Cartilage acidic protein 1 (68 kDa chondrocyte-expressed protein) (CEP-68) (ASPIC)	0	0	0	0	0	0	0	0	0	0	0	0	0	0	0	0	375198	0	0	437909	0	0	643010	0	0	0	0	642445	647043	0	421733	1.09883e+06	2.51407e+06	655920	1.40421e+06	767388	688185	3.45215e+06	0	0	237793
	P16870	CBPE_HUMAN	Carboxypeptidase E (CPE) (EC 3.4.17.10) (Carboxypeptidase H) (CPH) (Enkephalin convertase) (Prohormone-processing carboxypeptidase)	0	0	0	359307	0	0	0	0	0	0	0	0	0	0	693904	704966	325008	328535	0	443427	469293	0	736245	306918	210133	572161	373585	738555	726085	543566	770458	825525	1.73475e+06	274040	0	0	751982	1.25183e+06	255970	232690	437926
	P02794	FRIH_HUMAN	Ferritin heavy chain (Ferritin H subunit) (EC 1.16.3.1) (Cell proliferation-inducing gene 15 protein) [Cleaved into: Ferritin heavy chain, N-terminally processed]	0	0	0	2.56113e+06	0	0	0	0	0	0	0	351489	1.65768e+06	1.12507e+06	3.96698e+06	2.92942e+06	0	0	0	1.07406e+06	461393	0	0	0	0	0	0	0	0	0	0	0	0	0	0	0	0	0	0	0	0
	O95502	NPTXR_HUMAN	Neuronal pentraxin receptor	0	0	0	0	0	0	0	0	0	0	0	0	0	0	0	0	0	0	0	0	0	0	802217	281474	280247	0	0	367953	2.23828e+06	0	686788	1.23346e+06	3.07195e+06	0	988963	595104	316485	2.64635e+06	0	221561	406809
	Q6UX06	OLFM4_HUMAN	Olfactomedin-4 (OLM4) (Antiapoptotic protein GW112) (G-CSF-stimulated clone 1 protein) (hGC-1) (hOLfD)	0	0	0	0	0	0	0	0	0	0	0	0	0	0	0	0	0	0	0	0	0	0	0	0	0	0	1.48772e+06	2.45082e+06	1.01649e+06	2.22337e+06	2.36052e+06	926211	0	0	1.08849e+06	559779	0	2.04546e+06	0	0	0
	O75882	ATRN_HUMAN	Attractin (DPPT-L) (Mahogany homolog)	544030	0	0	355162	0	0	0	0	0	0	0	0	0	0	0	0	0	0	0	0	0	0	834108	0	0	1.279e+06	387675	423073	507839	2.16772e+06	1.18311e+06	307768	490283	903822	1.00855e+06	219782	363900	2.61732e+06	461657	0	137093
	P14625	ENPL_HUMAN	Endoplasmin (94 kDa glucose-regulated protein) (GRP-94) (Heat shock protein 90 kDa beta member 1) (Tumor rejection antigen 1) (gp96 homolog)	0	0	0	1.36281e+06	0	0	0	0	0	0	0	361860	688661	707818	2.56712e+06	2.2972e+06	0	0	0	2.53036e+06	757584	0	0	0	0	0	465940	0	0	0	0	314538	0	0	383387	0	0	2.07684e+06	0	0	0
	Q969P0	IGSF8_HUMAN	Immunoglobulin superfamily member 8 (IgSF8) (CD81 partner 3) (Glu-Trp-Ile EWI motif-containing protein 2) (EWI-2) (Keratinocytes-associated transmembrane protein 4) (KCT-4) (LIR-D1) (Prostaglandin regulatory-like protein) (PGRL) (CD antigen CD316)	0	0	0	0	0	0	0	0	0	0	0	0	0	0	0	0	0	0	0	0	0	0	0	300239	267268	0	680486	1.01828e+06	1.45099e+06	0	486785	1.3201e+06	2.06381e+06	0	997894	463606	848151	3.52368e+06	0	467288	837438
	P12109	CO6A1_HUMAN	Collagen alpha-1(VI) chain	0	0	0	579303	0	0	0	0	0	0	0	0	0	272834	0	910280	0	0	0	558580	479996	0	730028	141498	0	0	589410	984922	973625	607055	536760	690945	1.36406e+06	428555	735276	487780	546950	2.60892e+06	186233	259046	394997
	P06753	TPM3_HUMAN	Tropomyosin alpha-3 chain (Gamma-tropomyosin) (Tropomyosin-3) (Tropomyosin-5) (hTM5)	0	0	0	0	0	0	0	0	0	0	0	0	0	0	0	0	0	0	0	870609	0	0	0	0	0	0	1.99601e+06	1.45546e+06	0	0	0	1.20702e+06	0	0	2.24083e+06	0	0	6.80378e+06	306040	0	246387
	Q12907	LMAN2_HUMAN	Vesicular integral-membrane protein VIP36 (Glycoprotein GP36b) (Lectin mannose-binding 2) (Vesicular integral-membrane protein 36) (VIP36)	0	0	0	586307	0	0	0	0	0	0	0	0	0	1.19344e+06	0	0	0	0	0	794549	547289	0	0	267317	0	0	555206	989498	1.20163e+06	0	0	1.04135e+06	2.25416e+06	0	1.16328e+06	798053	314239	3.05897e+06	0	281763	407972
	P23284	PPIB_HUMAN	Peptidyl-prolyl cis-trans isomerase B (PPIase B) (EC 5.2.1.8) (CYP-S1) (Cyclophilin B) (Rotamase B) (S-cyclophilin) (SCYLP)	0	0	0	1.16681e+06	0	0	0	0	0	0	0	0	0	502595	1.39232e+06	1.66095e+06	0	0	0	953789	293801	0	0	0	0	0	1.19326e+06	1235249	0	876740	0	805449	0	0	1.03772e+06	0	259725	3.70548e+06	0	301697	386189
	P09104	ENOG_HUMAN	Gamma-enolase (EC 4.2.1.11) (2-phospho-D-glycerate hydro-lyase) (Enolase 2) (Neural enolase) (Neuron-specific enolase) (NSE)	0	0	0	1.83089e+06	0	0	0	0	0	0	0	487972	1.18582e+06	0	0	0	0	0	0	0	0	0	0	0	0	0	4.51309e+06	0	0	0	1.25102e+06	1.46798e+06	0	0	2.92461e+06	767728	0	0	619671	338404	422467
	P13521	SCG2_HUMAN	Secretogranin-2 (Chromogranin-C) (Secretogranin II) (SgII) [Cleaved into: Secretoneurin (SN); Manserin]	0	0	0	318263	0	0	0	0	0	0	0	0	0	0	901133	729159	0	0	0	417904	311956	219410	0	344518	245306	0	611101	771041	677117	796980	0	1.48488e+06	2.23239e+06	399093	1.33412e+06	1.03571e+06	518108	1.76205e+06	282413	263408	282003
	P07711	CATL1_HUMAN	Cathepsin L1 (EC 3.4.22.15) (Cathepsin L) (Major excreted protein) (MEP) [Cleaved into: Cathepsin L1 heavy chain; Cathepsin L1 light chain]	0	0	0	983783	0	0	0	0	0	0	0	0	638369	617395	2.26003e+06	1.8975e+06	0	0	0	1.77826e+06	1.22676e+06	0	0	0	0	0	0	0	794120	0	0	0	834888	0	1.1943e+06	0	438400	2.60504e+06	0	0	767347
	P08123	CO1A2_HUMAN	Collagen alpha-2(I) chain (Alpha-2 type I collagen)	0	0	0	678161	0	0	0	0	0	0	0	0	480990	475013	1.86974e+06	2.14364e+06	0	0	0	618847	545556	0	0	0	0	617631	779127	1.58659e+06	1.38094e+06	0	0	435622	1.40075e+06	0	806619	580501	289468	1.38203e+06	0	0	0
	P27797	CALR_HUMAN	Calreticulin (CRP55) (Calregulin) (Endoplasmic reticulum resident protein 60) (ERp60) (HACBP) (grp60)	0	0	0	677458	0	0	0	0	0	0	0	0	557753	405797	0	985867	0	0	0	591640	668762	0	1.04866e+06	0	0	0	795958	880492	1.354e+06	0	0	967323	1.25173e+06	0	1.07616e+06	531991	324475	3.3867e+06	146626	168846	349949
	O75874	IDHC_HUMAN	Isocitrate dehydrogenase [NADP] cytoplasmic (IDH) (EC 1.1.1.42) (Cytosolic NADP-isocitrate dehydrogenase) (IDP) (NADP(+)-specific ICDH) (Oxalosuccinate decarboxylase)	0	0	0	1.73593e+06	0	0	0	0	0	0	0	349085	917531	828172	2.73724e+06	2.25687e+06	0	0	0	1.25223e+06	606182	0	0	0	0	0	586837	844893	0	0	0	638534	416912	0	684194	0	0	2.40352e+06	0	0	0
	P11021	GRP78_HUMAN	78 kDa glucose-regulated protein (GRP-78) (Endoplasmic reticulum lumenal Ca(2+)-binding protein grp78) (Heat shock 70 kDa protein 5) (Immunoglobulin heavy chain-binding protein) (BiP)	0	0	0	1.32393e+06	0	0	0	0	0	295636	0	265390	734930	713480	2.34109e+06	2.39732e+06	0	145277	0	1.90027e+06	790241	0	0	0	0	0	429995	304939	373611	0	0	475800	396382	0	739821	307904	0	2.37554e+06	0	0	0
	P43251	BTD_HUMAN	Biotinidase (Biotinase) (EC 3.5.1.12)	0	0	0	268461	0	0	0	0	0	0	0	0	0	0	0	0	0	0	0	0	0	237896	973335	351230	0	1.13296e+06	1.08334e+06	854081	1.25479e+06	1.31688e+06	805705	884104	1.27725e+06	799755	809708	453732	615109	2.22549e+06	283164	228969	467701
	Q8N6C8	LIRA3_HUMAN	Leukocyte immunoglobulin-like receptor subfamily A member 3 (CD85 antigen-like family member E) (Immunoglobulin-like transcript 6) (ILT-6) (Leukocyte immunoglobulin-like receptor 4) (LIR-4) (Monocyte inhibitory receptor HM43/HM31) (CD antigen CD85e)	0	0	0	0	0	0	0	0	0	0	0	0	0	0	0	0	0	0	0	0	0	0	888336	0	0	572749	729505	1387285	0	2.46228e+06	1.63459e+06	385411	0	814287	1.19274e+06	0	0	5.36132e+06	686883	209502	0
	P59998	ARPC4_HUMAN	Actin-related protein 2/3 complex subunit 4 (Arp2/3 complex 20 kDa subunit) (p20-ARC)	0	0	0	0	0	0	0	0	0	0	0	0	0	0	0	0	0	0	0	1.26458e+06	0	0	0	0	0	0	1.6811e+06	2.21695e+06	0	0	0	753008	0	0	1.75255e+06	0	0	8.66689e+06	0	0	0
	Q02818	NUCB1_HUMAN	Nucleobindin-1 (CALNUC)	0	0	0	496946	0	0	0	0	0	0	0	283244	631511	434635	1.29198e+06	1.29756e+06	0	501619	0	650017	431097	0	681209	212590	180492	239059	498578	1.11837e+06	494862	471733	415839	690649	548838	372005	644495	262998	263928	2.37012e+06	203262	289717	415515
	Q92954	PRG4_HUMAN	Proteoglycan 4 (Lubricin) (Megakaryocyte-stimulating factor) (Superficial zone proteoglycan) [Cleaved into: Proteoglycan 4 C-terminal part]	0	0	0	984879	0	0	0	0	0	0	0	379609	1077060	770674	1.8328e+06	2.64345e+06	0	0	0	1.07038e+06	0	0	1.01202e+06	0	0	1.28979e+06	1.15844e+06	1.22867e+06	855590	1.04405e+06	0	0	648428	476219	0	0	0	0	0	0	0
	P43490	NAMPT_HUMAN	Nicotinamide phosphoribosyltransferase (NAmPRTase) (Nampt) (EC 2.4.2.12) (Pre-B-cell colony-enhancing factor 1) (Pre-B cell-enhancing factor) (Visfatin)	0	0	0	0	0	0	0	0	0	0	0	0	0	0	2.06832e+06	1.6761e+06	0	0	0	1.03087e+06	0	0	0	0	0	0	855766	591356	0	0	0	632444	0	0	784933	0	0	8.87753e+06	0	0	0
	Q9UGM5	FETUB_HUMAN	Fetuin-B (16G2) (Fetuin-like protein IRL685) (Gugu)	0	0	0	0	0	0	0	0	0	0	0	0	0	0	0	0	0	0	0	757199	0	0	1.3993e+06	0	0	2.07872e+06	949459	1.34561e+06	1.86045e+06	1.73141e+06	1.63679e+06	0	1.66491e+06	783518	456235	0	0	1.88165e+06	0	0	0
	P09960	LKHA4_HUMAN	Leukotriene A-4 hydrolase (LTA-4 hydrolase) (EC 3.3.2.6) (Leukotriene A(4) hydrolase)	0	0	0	500280	0	0	0	0	0	0	0	0	317010	377236	1.23715e+06	1.22174e+06	0	0	0	681249	303336	0	320565	0	0	0	1.22263e+06	1.57441e+06	782787	0	293109	1.38589e+06	0	0	1.30102e+06	472357	0	4.28047e+06	0	158321	160119
	P08253	MMP2_HUMAN	72 kDa type IV collagenase (EC 3.4.24.24) (72 kDa gelatinase) (Gelatinase A) (Matrix metalloproteinase-2) (MMP-2) (TBE-1) [Cleaved into: PEX]	0	0	0	701170	0	0	0	0	0	242266	0	289026	655606	700374	0	1.58751e+06	388324	323353	0	658714	584700	0	611668	51578.8	0	425261	438521	3.33405e+06	939315	0	0	402210	1.30703e+06	299549	488908	463722	324102	1.17384e+06	0	0	285510
	P98160	PGBM_HUMAN	Basement membrane-specific heparan sulfate proteoglycan core protein (HSPG) (Perlecan) (PLC) [Cleaved into: Endorepellin; LG3 peptide]	0	262388	0	352449	0	0	0	0	0	241377	0	0	395704	409819	705485	1.08378e+06	164767	404206	0	706602	666160	0	848740	0	0	317805	503586	787058	1.04599e+06	447083	190009	597262	1.06959e+06	208425	694075	505596	465789	2.86743e+06	263715	206432	292696
	P01210	PENK_HUMAN	Proenkephalin-A [Cleaved into: Synenkephalin; Met-enkephalin (Opioid growth factor) (OGF); PENK(114-133); PENK(143-183); Met-enkephalin-Arg-Gly-Leu; Leu-enkephalin; PENK(237-258); Met-enkephalin-Arg-Phe]	134986	0	0	0	0	0	0	0	0	0	0	0	0	0	0	0	0	0	0	836516	468558	501748	1.18406e+06	386232	647251	0	176729	0	543482	342275	467091	1.33695e+06	3.65944e+06	344412	661297	547029	1.20106e+06	2.61615e+06	171727	194341	367764
	Q13449	LSAMP_HUMAN	Limbic system-associated membrane protein (LSAMP) (IgLON family member 3)	0	0	0	0	0	0	0	0	0	0	0	0	0	0	0	0	0	0	0	0	0	129617	460181	0	219224	0	692588	1.02455e+06	587256	0	0	1.61668e+06	4.65432e+06	581768	1.30458e+06	930067	800546	2.74871e+06	0	584593	475398
	P49913	CAMP_HUMAN	Cathelicidin antimicrobial peptide (18 kDa cationic antimicrobial protein) (CAP-18) (hCAP-18) [Cleaved into: Antibacterial peptide FALL-39 (FALL-39 peptide antibiotic); Antibacterial peptide LL-37]	0	0	0	0	0	0	0	0	0	0	0	0	0	0	0	0	0	0	0	0	0	0	877246	0	0	619186	1.24301e+06	1.23635e+06	536526	4.07582e+06	2.04397e+06	774955	0	666712	1.78985e+06	385201	0	347113	2.24276e+06	0	0
	Q99435	NELL2_HUMAN	Protein kinase C-binding protein NELL2 (NEL-like protein 2) (Nel-related protein 2)	0	0	0	0	0	0	0	0	0	0	0	332017	0	0	0	0	400621	0	0	754727	611795	0	669135	279395	0	188253	274469	502991	462177	438207	569837	1.27072e+06	4.09556e+06	392880	1.04291e+06	674877	802982	2.38687e+06	327021	204887	376907
	Q01518	CAP1_HUMAN	Adenylyl cyclase-associated protein 1 (CAP 1)	0	0	0	1286332	617382	0	0	0	0	0	0	0	0	0	1.12148e+06	1.01205e+06	0	0	0	632817	0	0	0	0	0	2.66085e+06	1.47054e+06	1.51892e+06	0	0	0	698039	0	0	1.44704e+06	629942	0	3.90378e+06	162249	0	0
	P04180	LCAT_HUMAN	Phosphatidylcholine-sterol acyltransferase (EC 2.3.1.43) (Lecithin-cholesterol acyltransferase) (Phospholipid-cholesterol acyltransferase)	438745	0	0	0	0	0	0	0	0	0	0	0	0	0	0	0	0	0	0	0	0	0	1.83741e+06	0	0	1.69973e+06	801656	1.12069e+06	0	2.50472e+06	1.62165e+06	486660	1.78719e+06	810704	1.15079e+06	443936	293264	2.29155e+06	347169	0	0
	P19022	CADH2_HUMAN	Cadherin-2 (CDw325) (Neural cadherin) (N-cadherin) (CD antigen CD325)	0	0	0	557881	0	0	0	0	0	0	0	0	1.44639e+06	1221656	2.68518e+06	2.88256e+06	0	0	0	670411	295206	0	0	0	0	0	0	571801	564221	0	0	1.08261e+06	1.98659e+06	0	747334	712441	362619	1.52053e+06	0	183381	435363
	O00299	CLIC1_HUMAN	Chloride intracellular channel protein 1 (Chloride channel ABP) (Nuclear chloride ion channel 27) (NCC27) (Regulatory nuclear chloride ion channel protein) (hRNCC)	0	0	0	1.08765e+06	0	0	0	0	0	0	0	0	575533	640608	1.44208e+06	1.37259e+06	0	0	0	923731	0	0	0	0	0	0	1.63919e+06	1.82682e+06	0	0	339493	765152	0	0	929970	474572	0	5.96508e+06	0	0	0
	P18510	IL1RA_HUMAN	Interleukin-1 receptor antagonist protein (IL-1RN) (IL-1ra) (IRAP) (ICIL-1RA) (IL1 inhibitor) (Anakinra)	0	0	0	0	0	0	0	0	0	0	0	0	0	0	0	0	0	0	0	0	0	0	1.83723e+06	0	0	1273997	533790	0	0	5.86948e+06	3.29637e+06	0	0	1.54133e+06	1.00199e+06	0	0	1.97073e+06	663001	0	0
	P39060	COIA1_HUMAN	Collagen alpha-1(XVIII) chain [Cleaved into: Endostatin]	0	0	0	593969	0	0	0	0	0	0	0	0	171737	0	0	1.13895e+06	0	0	0	434796	388607	0	1.70122e+06	109665	0	0	743373	1.13628e+06	1.06083e+06	1.22328e+06	491739	682543	1.7096e+06	413837	591393	306898	441535	4.11431e+06	334207	131300	238749
	P29622	KAIN_HUMAN	Kallistatin (Kallikrein inhibitor) (Peptidase inhibitor 4) (PI-4) (Serpin A4)	916877	0	0	916582	0	0	0	0	0	0	0	0	0	0	1.35473e+06	1.40013e+06	0	0	0	625307	470817	0	989761	0	0	5.31736e+06	0	0	635142	2.19056e+06	866588	0	0	834308	0	0	300303	893773	774943	0	0
	P07900	HS90A_HUMAN	Heat shock protein HSP 90-alpha (Heat shock 86 kDa) (HSP 86) (HSP86) (Lipopolysaccharide-associated protein 2) (LAP-2) (LPS-associated protein 2) (Renal carcinoma antigen NY-REN-38)	0	0	0	1.31205e+06	0	0	0	0	0	0	0	248380	1.05061e+06	614148	1.63658e+06	1.67852e+06	0	0	0	1.67597e+06	678084	0	0	0	0	0	895839	1.10199e+06	0	388791	0	411085	0	0	1.09006e+06	246752	0	4.7731e+06	528895	249115	276285
	P80723	BASP1_HUMAN	Brain acid soluble protein 1 (22 kDa neuronal tissue-enriched acidic protein) (Neuronal axonal membrane protein NAP-22)	0	0	0	326538	0	0	0	0	0	0	0	90560.1	351466	264491	1.06782e+06	925699	0	0	0	596956	487126	0	526706	0	39852.9	332288	1.34289e+06	1.64019e+06	1.10744e+06	332040	409630	1.36945e+06	718796	151075	1.80624e+06	559451	251628	3.40142e+06	331834	300150	270748
	P62258	1433E_HUMAN	14-3-3 protein epsilon (14-3-3E)	0	0	0	760201	0	0	0	0	0	0	0	326089	850067	714534	1.84403e+06	1.76059e+06	0	0	0	833950	367399	135559	264293	0	0	450843	620433	846802	311028	795911	764571	710655	359163	318056	1.88268e+06	449615	0	2.67269e+06	403745	236034	378101
	P31946	1433B_HUMAN	14-3-3 protein beta/alpha (Protein 1054) (Protein kinase C inhibitor protein 1) (KCIP-1) [Cleaved into: 14-3-3 protein beta/alpha, N-terminally processed]	0	0	0	719585	0	0	0	0	0	0	0	0	435914	0	1.68231e+06	1.31076e+06	0	0	0	716313	0	0	0	0	0	0	1.54257e+06	1.70667e+06	378433	0	533274	1.02889e+06	0	0	2.69775e+06	357375	0	4.89304e+06	458403	269147	394451
	O00584	RNT2_HUMAN	Ribonuclease T2 (EC 3.1.27.-) (Ribonuclease 6)	0	0	0	0	0	0	0	0	0	0	0	0	0	0	0	0	0	0	0	0	0	252408	512224	396925	259849	318201	554997	1.36853e+06	1.22102e+06	540632	676719	1.31574e+06	1.08219e+06	492846	1.40498e+06	659199	897015	5.28152e+06	297635	591067	1.02615e+06
	P26022	PTX3_HUMAN	Pentraxin-related protein PTX3 (Pentaxin-related protein PTX3) (Tumor necrosis factor alpha-induced protein 5) (TNF alpha-induced protein 5) (Tumor necrosis factor-inducible gene 14 protein) (TSG-14)	0	0	0	0	0	0	0	0	0	0	0	0	0	0	0	0	0	0	0	0	0	0	2.38343e+06	0	0	1.93901e+06	1.30724e+06	796613	0	3.17126e+06	2.88691e+06	489674	0	1.22351e+06	1.27515e+06	913746	0	1.99139e+06	920023	0	0
	O75636	FCN3_HUMAN	Ficolin-3 (Collagen/fibrinogen domain-containing lectin 3 p35) (Collagen/fibrinogen domain-containing protein 3) (Hakata antigen)	1.60339e+06	0	0	0	0	0	0	0	0	0	0	0	0	0	0	0	0	0	0	0	0	0	1.32229e+06	0	0	2.2845e+06	578748	0	0	4.98265e+06	2.76849e+06	0	0	2.00778e+06	2.12128e+06	472484	0	0	1.16106e+06	0	0
	Q8WXD2	SCG3_HUMAN	Secretogranin-3 (Secretogranin III) (SgIII)	0	0	0	594158	0	0	0	0	0	0	0	231183	481932	339399	1.13434e+06	791377	0	0	0	537108	369618	0	1.01895e+06	205929	0	475751	510444	768200	636402	562108	710088	965847	2.98087e+06	411066	1.11083e+06	612442	765003	2.798e+06	272848	223603	234434
	O00391	QSOX1_HUMAN	Sulfhydryl oxidase 1 (hQSOX) (EC 1.8.3.2) (Quiescin Q6)	0	0	0	788589	0	0	0	0	0	0	0	0	464102	317336	1.16576e+06	1.00764e+06	0	0	0	740309	524611	0	709096	310158	0	874509	623040	909092	911888	1.51123e+06	728583	675349	1.00562e+06	711101	805769	494442	415526	3.1727e+06	711775	238515	298330
	P18669	PGAM1_HUMAN	Phosphoglycerate mutase 1 (EC 3.1.3.13) (EC 5.4.2.11) (EC 5.4.2.4) (BPG-dependent PGAM 1) (Phosphoglycerate mutase isozyme B) (PGAM-B)	0	0	0	0	0	0	0	0	0	0	0	0	0	0	978403	1.00146e+06	0	0	0	853487	832298	0	0	0	0	278515	1.22327e+06	2.31046e+06	1.24668e+06	815702	995944	1.3512e+06	0	0	2.06585e+06	889497	0	4.4628e+06	448868	252987	610506
	P01880	IGHD_HUMAN	Ig delta chain C region	0	0	0	0	0	0	0	0	0	0	0	0	0	0	0	0	0	0	0	0	0	0	1.64751e+06	0	0	698980	0	0	0	3.40158e+06	3.14338e+06	795216	3.12936e+06	518259	1.22396e+06	0	249080	4.99454e+06	418017	0	631752
	P27918	PROP_HUMAN	Properdin (Complement factor P)	0	0	0	0	0	0	0	0	0	0	0	0	0	0	0	0	0	0	0	0	0	0	2.2134e+06	0	0	1.84028e+06	1.1442e+06	1.58943e+06	878149	2.90468e+06	2.8424e+06	634823	0	971280	2.02015e+06	440183	0	3.13052e+06	314516	0	0
	P12259	FA5_HUMAN	Coagulation factor V (Activated protein C cofactor) (Proaccelerin, labile factor) [Cleaved into: Coagulation factor V heavy chain; Coagulation factor V light chain]	1.20251e+06	0	0	437582	0	0	0	0	0	0	0	0	0	0	1.00695e+06	912060	330267	294475	0	649061	546964	260843	901736	813611	593970	845035	459172	1.0546e+06	1.06774e+06	867265	828218	1.69143e+06	814528	712409	980310	542883	316495	1.50569e+06	359769	362570	595032
	P15169	CBPN_HUMAN	Carboxypeptidase N catalytic chain (CPN) (EC 3.4.17.3) (Anaphylatoxin inactivator) (Arginine carboxypeptidase) (Carboxypeptidase N polypeptide 1) (Carboxypeptidase N small subunit) (Kininase-1) (Lysine carboxypeptidase) (Plasma carboxypeptidase B) (Serum carboxypeptidase N) (SCPN)	345741	0	0	0	0	0	0	0	0	0	0	0	0	0	0	0	0	0	0	0	0	0	1.98147e+06	0	0	1.21203e+06	1.22771e+06	915048	776719	2.6508e+06	2.40546e+06	0	0	1.48043e+06	1.84931e+06	556730	0	4.48412e+06	1.11901e+06	0	0
	P31949	S10AB_HUMAN	Protein S100-A11 (Calgizzarin) (Metastatic lymph node gene 70 protein) (MLN 70) (Protein S100-C) (S100 calcium-binding protein A11) [Cleaved into: Protein S100-A11, N-terminally processed]	0	0	0	1.08352e+06	0	0	0	0	0	0	0	0	559433	832704	2.84651e+06	2.4485e+06	0	0	0	1.06631e+06	371327	0	0	0	0	0	2.11671e+06	1.33794e+06	0	0	0	822748	0	0	3.68386e+06	0	0	3.9568e+06	0	0	0
	P09972	ALDOC_HUMAN	Fructose-bisphosphate aldolase C (EC 4.1.2.13) (Brain-type aldolase)	0	0	0	688064	0	0	0	0	0	0	0	177077	480275	415602	1.28237e+06	1.39577e+06	0	787712	0	1.21384e+06	832888	0	0	0	0	336658	1.0026e+06	1.14348e+06	593461	455872	442038	994127	881708	0	2.35458e+06	782773	198651	3.94979e+06	333040	148373	381865
	Q9UBR2	CATZ_HUMAN	Cathepsin Z (EC 3.4.18.1) (Cathepsin P) (Cathepsin X)	0	0	0	394835	0	0	0	0	0	0	0	0	0	0	0	0	0	0	0	0	0	451556	1.155e+06	416340	301265	429788	717991	1.89978e+06	1.2659e+06	734240	845786	1.1664e+06	1.0114e+06	596970	1.77238e+06	606965	920331	5.03255e+06	337391	791318	813178
	P08519	APOA_HUMAN	Apolipoprotein(a) (Apo(a)) (Lp(a)) (EC 3.4.21.-)	1.19789e+06	0	0	593054	0	0	0	0	0	0	0	0	0	0	0	0	0	0	0	0	0	0	2.07072e+06	107588	0	700342	0	0	0	4.3692e+06	3.69255e+06	205394	0	3.98583e+06	3.92293e+06	669952	0	0	179098	0	0
	Q9NZP8	C1RL_HUMAN	Complement C1r subcomponent-like protein (C1r-LP) (C1r-like protein) (EC 3.4.21.-) (C1r-like serine protease analog protein) (CLSPa)	277365	0	0	668356	0	0	0	0	0	0	0	0	0	0	781449	541669	0	0	0	343200	0	0	1.68718e+06	0	0	1.66947e+06	593939	950441	1.30242e+06	1.8946e+06	1.37588e+06	574206	1.09277e+06	1.09122e+06	1.71701e+06	446892	410991	3.55082e+06	482671	182143	198294
	P55290	CAD13_HUMAN	Cadherin-13 (Heart cadherin) (H-cadherin) (P105) (Truncated cadherin) (T-cad) (T-cadherin)	0	0	0	0	0	0	0	0	0	0	0	0	892182	0	0	0	0	0	0	464679	0	0	705010	297291	242760	0	0	969436	1.14034e+06	0	387086	2.27853e+06	5.03977e+06	0	2.10891e+06	1.44026e+06	768647	4.27345e+06	0	385218	541172
	P61160	ARP2_HUMAN	Actin-related protein 2 (Actin-like protein 2)	0	0	0	0	0	0	0	0	0	0	0	0	0	0	0	0	0	0	0	353177	0	0	0	0	0	675479	1.26046e+06	1.20658e+06	0	0	0	0	0	0	1.31297e+07	2.20511e+06	0	3.21584e+06	0	0	0
	P26447	S10A4_HUMAN	Protein S100-A4 (Calvasculin) (Metastasin) (Placental calcium-binding protein) (Protein Mts1) (S100 calcium-binding protein A4)	0	0	0	1.23993e+06	0	0	251892	0	0	0	0	451091	1.54137e+06	1.62346e+06	5.98235e+06	3.84824e+06	0	0	0	565126	292934	0	0	0	0	0	1.22656e+06	839727	0	0	0	261327	0	0	1.00719e+06	0	0	2.96152e+06	0	0	0
	Q14019	COTL1_HUMAN	Coactosin-like protein	0	0	0	846775	0	0	0	0	0	0	0	0	682940	296479	1.4111e+06	1.33949e+06	0	0	0	965173	492128	0	0	0	0	490244	2.01401e+06	2.23324e+06	605654	0	369513	910381	513821	0	2.10275e+06	517181	0	5.87551e+06	328736	186786	201748
	P05231	IL6_HUMAN	Interleukin-6 (IL-6) (B-cell stimulatory factor 2) (BSF-2) (CTL differentiation factor) (CDF) (Hybridoma growth factor) (Interferon beta-2) (IFN-beta-2)	0	0	0	0	0	0	0	0	0	0	0	0	0	0	0	0	0	0	0	0	0	0	2.41666e+06	0	0	2.33553e+06	1.031e+06	0	0	4.7809e+06	5.62715e+06	0	0	1.98681e+06	1.09242e+06	0	0	2.34902e+06	966395	0	0
	Q6UX73	CP089_HUMAN	UPF0764 protein C16orf89	0	0	0	0	0	0	0	0	0	0	0	0	0	0	0	0	0	0	0	1.57508e+07	0	0	0	0	0	0	0	291102	950325	0	0	0	1.55014e+06	0	0	409165	200624	3.75976e+06	0	0	0
	O75368	SH3L1_HUMAN	SH3 domain-binding glutamic acid-rich-like protein	0	0	0	1.32141e+06	0	0	0	0	0	0	0	0	1.03334e+06	1.08696e+06	2.85975e+06	2.66292e+06	0	0	0	962218	625533	0	0	0	0	0	1.45984e+06	1.87715e+06	560651	0	0	815968	440010	0	2.34545e+06	496353	0	4.31336e+06	290447	0	199827
	P26038	MOES_HUMAN	Moesin (Membrane-organizing extension spike protein)	0	0	0	1.25121e+06	0	0	0	0	0	0	0	264307	845208	701139	2.13555e+06	1.83189e+06	0	329899	0	1.08504e+06	473600	0	509903	0	0	0	1.67237e+06	1.75156e+06	338244	888999	0	916317	0	0	2.276e+06	785742	0	5.12046e+06	305811	0	0
	P30740	ILEU_HUMAN	Leukocyte elastase inhibitor (LEI) (Monocyte/neutrophil elastase inhibitor) (EI) (M/NEI) (Peptidase inhibitor 2) (PI-2) (Serpin B1)	0	0	0	643080	0	0	0	0	0	0	0	0	0	352678	1.13947e+06	998483	0	0	0	801963	372611	0	808642	0	0	520323	2.22718e+06	1.90875e+06	0	641917	670815	632059	0	0	1.72913e+06	257979	0	9.07013e+06	320066	217175	252715
	P10153	RNAS2_HUMAN	Non-secretory ribonuclease (EC 3.1.27.5) (Eosinophil-derived neurotoxin) (RNase UpI-2) (Ribonuclease 2) (RNase 2) (Ribonuclease US)	0	0	0	1297343	0	0	0	0	0	0	0	0	0	569048	2.14029e+06	989306	0	0	0	1.31184e+06	984552	0	0	0	0	0	911079	1.24963e+06	1.17894e+06	1.37808e+06	0	1.18406e+06	0	762251	1.2253e+06	646391	1.47017e+06	4.16191e+06	1.08145e+06	449672	646412
	O14498	ISLR_HUMAN	Immunoglobulin superfamily containing leucine-rich repeat protein	0	0	0	1.18484e+06	0	0	0	0	0	0	0	185594	1.19298e+06	620692	3.20721e+06	2.74546e+06	0	0	0	882315	965205	0	1.40087e+06	0	0	730348	618630	1.02723e+06	851272	0	0	283452	1.79008e+06	345062	881038	504212	595653	3.88785e+06	0	0	0
	P00740	FA9_HUMAN	Coagulation factor IX (EC 3.4.21.22) (Christmas factor) (Plasma thromboplastin component) (PTC) [Cleaved into: Coagulation factor IXa light chain; Coagulation factor IXa heavy chain]	0	0	0	0	0	0	0	0	0	0	0	0	0	0	0	0	0	0	0	0	0	0	1.70045e+06	163554	0	2.68033e+06	1.07575e+06	1.41642e+06	1.87125e+06	3.33154e+06	1.76167e+06	550153	1.43338e+06	1.51908e+06	1.0537e+06	287796	0	3.82718e+06	747673	236042	296307
	Q8TEU8	WFKN2_HUMAN	WAP, Kazal, immunoglobulin, Kunitz and NTR domain-containing protein 2 (Growth and differentiation factor-associated serum protein 1) (GASP-1) (hGASP-1) (WAP, follistatin, immunoglobulin, Kunitz and NTR domain-containing-related protein) (WFIKKN-related protein)	0	0	0	0	0	0	0	0	0	0	0	0	0	0	958185	1.19693e+06	0	0	0	0	0	0	0	1.39044e+06	944723	0	304470	504792	563917	0	0	2.05851e+06	879552	1.70757e+06	3.74718e+06	1.90611e+06	530247	1.86422e+06	326611	1.92736e+06	3.64822e+06
	Q9Y287	ITM2B_HUMAN	Integral membrane protein 2B (Immature BRI2) (imBRI2) (Protein E25B) (Transmembrane protein BRI) (Bri) [Cleaved into: BRI2, membrane form (Mature BRI2) (mBRI2); BRI2 intracellular domain (BRI2 ICD); BRI2C, soluble form; Bri23 peptide (Bri2-23) (ABri23) (C-terminal peptide) (P23 peptide)]	0	0	0	0	0	0	0	0	0	0	0	0	0	0	0	0	0	0	0	0	0	0	0	0	1.67551e+06	0	0	0	6.36254e+06	0	0	6243479	0	0	0	1.55373e+06	0	0	0	2.95149e+06	5.94847e+06
	P35527	K1C9_HUMAN	Keratin, type I cytoskeletal 9 (Cytokeratin-9) (CK-9) (Keratin-9) (K9)	411552	0	0	1.28254e+06	533690	0	0	0	0	0	0	0	165346	174906	1.00899e+06	913988	0	257075	0	0	0	2.04202e+06	414714	420852	1.12383e+06	2.84059e+06	211223	365701	1.77807e+06	2.16577e+06	498413	786015	486534	518927	871580	900544	2.64406e+06	0	1.39822e+06	209612	457205
	P27930	IL1R2_HUMAN	Interleukin-1 receptor type 2 (IL-1R-2) (IL-1RT-2) (IL-1RT2) (CD121 antigen-like family member B) (CDw121b) (IL-1 type II receptor) (Interleukin-1 receptor beta) (IL-1R-beta) (Interleukin-1 receptor type II) (CD antigen CD121b) [Cleaved into: Interleukin-1 receptor type 2, membrane form (mIL-1R2) (mIL-1RII); Interleukin-1 receptor type 2, soluble form (sIL-1R2) (sIL-1RII)]	0	0	0	0	0	0	0	0	0	0	0	0	0	0	0	0	0	0	0	0	0	0	0	0	0	0	1.38205e+06	1.90341e+06	0	506977	0	1.71473e+06	0	0	1.87732e+06	705783	0	1.50276e+07	1.18138e+06	565272	662426
	P07738	PMGE_HUMAN	Bisphosphoglycerate mutase (BPGM) (EC 5.4.2.4) (2,3-bisphosphoglycerate mutase, erythrocyte) (2,3-bisphosphoglycerate synthase) (EC 3.1.3.13) (EC 5.4.2.11) (2,3-diphosphoglycerate mutase) (DPGM) (BPG-dependent PGAM)	0	0	0	2.21896e+06	0	0	640414	0	0	0	0	887487	2.26638e+06	1.92517e+06	7.37649e+06	5.70715e+06	0	415427	641096	2.03134e+06	1.50401e+06	0	0	0	0	0	0	0	0	0	0	0	0	0	0	0	0	0	0	0	0
	P06744	G6PI_HUMAN	Glucose-6-phosphate isomerase (GPI) (EC 5.3.1.9) (Autocrine motility factor) (AMF) (Neuroleukin) (NLK) (Phosphoglucose isomerase) (PGI) (Phosphohexose isomerase) (PHI) (Sperm antigen 36) (SA-36)	0	0	0	718466	0	0	0	0	0	0	0	0	224785	185736	809448	1.43164e+06	0	0	0	1.05441e+06	604536	0	0	0	0	379119	1.61989e+06	2.74347e+06	1.63627e+06	1.20653e+06	440150	1.86399e+06	0	107665	2.37745e+06	601243	0	6.6544e+06	404278	291644	273990
	P00742	FA10_HUMAN	Coagulation factor X (EC 3.4.21.6) (Stuart factor) (Stuart-Prower factor) [Cleaved into: Factor X light chain; Factor X heavy chain; Activated factor Xa heavy chain]	933261	0	0	558898	0	0	0	0	0	0	0	0	0	0	0	0	0	0	0	0	0	0	1.91207e+06	0	0	2.61018e+06	1.39076e+06	1.8725e+06	2.08158e+06	3.25952e+06	2.26595e+06	434206	1.97829e+06	891337	692377	0	239596	4.15516e+06	547944	0	0
	P09603	CSF1_HUMAN	Macrophage colony-stimulating factor 1 (CSF-1) (M-CSF) (MCSF) (Lanimostim) [Cleaved into: Processed macrophage colony-stimulating factor 1]	0	0	0	0	0	0	0	0	0	0	0	0	0	0	0	0	0	0	0	753428	513537	314190	2.00275e+06	0	0	888818	919694	1.31011e+06	1.25863e+06	1.18076e+06	961725	1.62347e+06	2.31547e+06	732152	1105724	840845	864009	6.44228e+06	737360	564647	692182
	P63104	1433Z_HUMAN	14-3-3 protein zeta/delta (Protein kinase C inhibitor protein 1) (KCIP-1)	0	0	0	924630	0	0	0	0	0	277954	0	508970	580989	514050	2.05527e+06	2.15136e+06	0	0	0	1.32286e+06	698599	0	0	0	0	0	1.31583e+06	1.55142e+06	795902	871304	414925	1.32039e+06	752477	195338	2.26004e+06	661478	0	5.25415e+06	897372	271682	533261
	Q96FE7	P3IP1_HUMAN	Phosphoinositide-3-kinase-interacting protein 1 (Kringle domain-containing protein HGFL)	0	0	0	0	0	0	0	0	0	0	0	0	0	0	0	0	0	0	0	0	0	0	1.02805e+06	754803	449603	0	0	1.03191e+06	2.00366e+06	0	0	3.16974e+06	4.96195e+06	673663	2.08399e+06	1.19536e+06	1.83595e+06	5.30967e+06	0	553776	1.08194e+06
	O15240	VGF_HUMAN	Neurosecretory protein VGF [Cleaved into: Neuroendocrine regulatory peptide-1 (NERP-1); Neuroendocrine regulatory peptide-2 (NERP-2); Antimicrobial peptide VGF[554-577]]	0	0	0	365752	0	0	223786	0	0	0	0	0	284678	0	340075	0	239856	136914	0	266620	310216	310392	2.46173e+06	341026	388021	0	1.10235e+06	864141	1.4119e+06	2.73829e+06	2.54234e+06	1.48166e+06	4.99653e+06	746467	1.19584e+06	935051	528382	1.00062e+06	290223	310932	360588
	P35754	GLRX1_HUMAN	Glutaredoxin-1 (Thioltransferase-1) (TTase-1)	0	0	0	1.12914e+06	0	0	0	0	0	0	0	0	0	1.00612e+06	3.4589e+06	2.55346e+06	0	0	0	1.15605e+06	791621	0	0	0	0	0	1.57419e+06	1.98674e+06	0	0	0	1.00156e+06	0	0	1.92309e+06	487577	0	9.24146e+06	0	0	0
	Q86WI1	PKHL1_HUMAN	Fibrocystin-L (Polycystic kidney and hepatic disease 1-like protein 1) (PKHD1-like protein 1)	0	0	0	0	0	0	0	0	0	0	0	0	0	0	0	0	0	0	0	0	0	0	0	0	0	0	3.58765e+06	8.15551e+06	4.67933e+06	0	0	4.03881e+06	0	0	0	1.35419e+06	0	0	0	2.01811e+06	2.80829e+06
	Q06033	ITIH3_HUMAN	Inter-alpha-trypsin inhibitor heavy chain H3 (ITI heavy chain H3) (ITI-HC3) (Inter-alpha-inhibitor heavy chain 3) (Serum-derived hyaluronan-associated protein) (SHAP)	672818	0	0	1.15489e+06	0	0	0	0	0	0	0	0	0	0	0	0	0	0	0	561332	520193	0	1.43976e+06	0	0	2.2039e+06	988679	1.05081e+06	1.36509e+06	3.35175e+06	2.45246e+06	956348	1.09415e+06	1.14359e+06	1.73512e+06	796304	572870	3.15715e+06	1.14468e+06	279397	221287
	O43866	CD5L_HUMAN	CD5 antigen-like (Apoptosis inhibitor expressed by macrophages) (hAIM) (CT-2) (IgM-associated peptide) (SP-alpha)	562970	0	0	297478	253753	0	0	0	0	0	0	0	0	0	0	0	0	0	0	0	0	0	2.36939e+06	0	0	2.0529e+06	1.03105e+06	962865	590298	3.9919e+06	3.83594e+06	405896	295798	2.23524e+06	4.05228e+06	818306	0	2.71227e+06	536716	0	0
	Q92823	NRCAM_HUMAN	Neuronal cell adhesion molecule (Nr-CAM) (Neuronal surface protein Bravo) (hBravo) (NgCAM-related cell adhesion molecule) (Ng-CAM-related)	0	373165	0	285366	0	0	0	0	0	0	0	207365	487462	0	553037	321605	316389	2.59421e+06	0	407719	360056	166307	1.02149e+06	345811	0	524723	471302	944498	584826	1.10979e+06	705255	1.36406e+06	4.17941e+06	582395	2.26784e+06	966973	1.12714e+06	3.85828e+06	307487	263087	391888
	P35858	ALS_HUMAN	Insulin-like growth factor-binding protein complex acid labile subunit (ALS)	744445	0	0	578444	264604	0	0	0	0	0	0	0	0	699383	0	0	0	0	0	0	295695	0	2.68187e+06	0	0	4.33185e+06	2.36255e+06	2.42629e+06	2.61722e+06	2.44756e+06	1.53198e+06	327618	846248	680094	792479	347069	0	2.74913e+06	400164	0	204893
	P29401	TKT_HUMAN	Transketolase (TK) (EC 2.2.1.1)	0	0	0	1.01065e+06	0	0	0	0	0	168145	0	321834	689111	615955	2.52037e+06	2.23689e+06	0	265882	340924	1.5939e+06	964702	146604	380713	0	0	733913	1.45776e+06	2.25388e+06	1.09893e+06	663540	401504	1.59896e+06	0	402189	1.76638e+06	884095	0	3.68234e+06	603472	275179	322578
	Q96GW7	PGCB_HUMAN	Brevican core protein (Brain-enriched hyaluronan-binding protein) (BEHAB) (Chondroitin sulfate proteoglycan 7)	0	0	0	896584	0	0	0	0	0	0	0	0	705686	0	0	0	0	0	0	919112	0	1.06162e+06	908490	630935	788101	324312	756466	1.42834e+06	1.33514e+06	1.60896e+06	1.05553e+06	1.34048e+06	3.93962e+06	843762	1.76714e+06	667263	1.5138e+06	3.38038e+06	390077	602386	536828
	P18428	LBP_HUMAN	Lipopolysaccharide-binding protein (LBP)	0	0	0	433398	0	0	0	0	0	0	0	0	0	0	0	0	0	0	0	0	0	0	2.9511e+06	0	0	956096	932265	1.60482e+06	1.01449e+06	3.54768e+06	1.60944e+06	489800	760498	2.39364e+06	1.86917e+06	867127	200467	4.96063e+06	2.26864e+06	285153	346840
	Q14515	SPRL1_HUMAN	SPARC-like protein 1 (High endothelial venule protein) (Hevin) (MAST 9)	0	0	0	822227	0	0	0	0	0	205689	0	221517	598276	373169	942671	850891	436267	505554	0	640033	548166	567497	994011	567236	479193	877725	726076	935252	1.06899e+06	589748	1.00833e+06	1.59941e+06	2.77124e+06	742572	1.27716e+06	768875	1.10334e+06	3.35531e+06	672394	523592	868169
	Q13228	SBP1_HUMAN	Selenium-binding protein 1 (56 kDa selenium-binding protein) (SBP56) (SP56)	0	0	164654	2.14007e+06	0	0	848170	0	0	456190	0	881659	2.24083e+06	2.16058e+06	6.35292e+06	5.48266e+06	0	331019	753259	1.83332e+06	1.2992e+06	187476	0	0	0	0	0	0	0	687420	448401	0	368737	0	705229	0	0	0	356532	0	0
	Q99497	PARK7_HUMAN	Protein deglycase DJ-1 (DJ-1) (EC 3.1.2.-) (EC 3.5.1.-) (Oncogene DJ1) (Parkinson disease protein 7)	0	0	0	2.10748e+06	0	0	536766	0	0	231321	0	568134	1.48345e+06	2.08147e+06	4.2073e+06	3.44128e+06	0	0	305839	2.39201e+06	1.16964e+06	0	0	0	0	0	950003	1.23045e+06	0	1.13747e+06	0	753497	0	0	1.1371e+06	0	0	4269507	0	0	0
	Q16769	QPCT_HUMAN	Glutaminyl-peptide cyclotransferase (EC 2.3.2.5) (Glutaminyl cyclase) (QC) (sQC) (Glutaminyl-tRNA cyclotransferase) (Glutamyl cyclase) (EC)	0	0	0	0	0	0	0	0	0	0	0	0	0	0	0	0	0	0	0	0	0	0	1.1119e+06	0	0	926159	9.56465e+06	1.09195e+06	0	2.833e+06	1.18941e+06	1.11046e+06	2.20585e+06	930339	1.70199e+06	678874	696676	2.91543e+06	675405	253957	313300
	P16035	TIMP2_HUMAN	Metalloproteinase inhibitor 2 (CSC-21K) (Tissue inhibitor of metalloproteinases 2) (TIMP-2)	0	0	0	1.1501e+06	0	0	0	0	0	0	0	0	0	0	0	0	0	0	0	1.01677e+06	792421	0	1.53784e+06	541901	0	834355	1.57302e+06	2.34825e+06	2.97147e+06	0	1.04894e+06	1.22351e+06	2.32073e+06	807793	1.73552e+06	744983	1.01213e+06	4.62479e+06	518040	446694	1.03389e+06
	P14151	LYAM1_HUMAN	L-selectin (CD62 antigen-like family member L) (Leukocyte adhesion molecule 1) (LAM-1) (Leukocyte surface antigen Leu-8) (Leukocyte-endothelial cell adhesion molecule 1) (LECAM1) (Lymph node homing receptor) (TQ1) (gp90-MEL) (CD antigen CD62L)	0	0	0	0	0	0	0	0	0	0	0	0	0	0	0	0	0	0	0	0	0	0	1.97688e+06	0	0	2.00737e+06	1.24619e+06	1.20281e+06	1.01801e+06	3.49401e+06	2.45597e+06	817073	774776	1.73501e+06	2.57422e+06	779688	0	7.12462e+06	917238	230043	0
	P50395	GDIB_HUMAN	Rab GDP dissociation inhibitor beta (Rab GDI beta) (Guanosine diphosphate dissociation inhibitor 2) (GDI-2)	0	0	0	1.32375e+06	0	0	0	0	0	0	0	0	1.11314e+06	931461	2.97923e+06	2.26156e+06	0	0	0	1.52444e+06	424397	0	0	0	0	0	681792	766516	0	0	760727	886035	0	0	1.26133e+06	227906	0	1.33063e+07	0	0	0
	O95445	APOM_HUMAN	Apolipoprotein M (Apo-M) (ApoM) (Protein G3a)	1.23887e+06	0	0	0	0	0	0	0	0	0	0	0	0	0	0	0	0	0	0	0	0	0	8.59132e+06	0	0	2.70615e+06	3.72123e+06	0	2.97806e+06	2.60286e+06	2351640	0	0	2.95468e+06	0	0	0	0	2.05573e+06	0	0
	Q12860	CNTN1_HUMAN	Contactin-1 (Glycoprotein gp135) (Neural cell surface protein F3)	0	252614	0	461846	0	0	0	0	0	0	0	0	545346	0	2.20855e+06	620206	506838	0	0	1.59741e+06	621410	171942	1.59298e+06	384116	287821	627340	940311	1.31315e+06	1.12497e+06	687751	917102	1.1269e+06	3.1138e+06	685584	1.97677e+06	932869	1.01028e+06	4.677e+06	423007	360986	547810
	Q92520	FAM3C_HUMAN	Protein FAM3C (Interleukin-like EMT inducer)	0	699923	0	506002	0	0	0	0	0	0	0	235311	434536	947185	1.12268e+06	742657	636405	0	0	859239	458533	158346	1.40982e+06	307350	0	309027	670560	1.21251e+06	1.23259e+06	563567	795011	1.71057e+06	4.40997e+06	364225	2.43103e+06	1.23184e+06	753510	4.53989e+06	287031	339013	459698
	P09486	SPRC_HUMAN	SPARC (Basement-membrane protein 40) (BM-40) (Osteonectin) (ON) (Secreted protein acidic and rich in cysteine)	228398	0	0	492812	0	0	0	0	0	0	0	0	246835	195747	899861	704970	496467	201750	0	746431	682220	1.25747e+06	804160	2.33074e+06	1.96522e+06	786058	1.1555e+06	1.47678e+06	1.93469e+06	801248	1.09229e+06	2.89564e+06	1.17066e+06	486304	1.49741e+06	629839	552977	1.91071e+06	799901	605845	1.1994e+06
	Q14520	HABP2_HUMAN	Hyaluronan-binding protein 2 (EC 3.4.21.-) (Factor VII-activating protease) (Factor seven-activating protease) (FSAP) (Hepatocyte growth factor activator-like protein) (Plasma hyaluronan-binding protein) [Cleaved into: Hyaluronan-binding protein 2 50 kDa heavy chain; Hyaluronan-binding protein 2 50 kDa heavy chain alternate form; Hyaluronan-binding protein 2 27 kDa light chain; Hyaluronan-binding…	209725	0	0	664985	0	0	0	0	0	0	0	0	0	0	0	480454	0	0	0	317892	261108	0	2.25849e+06	0	0	2.55764e+06	1.86663e+06	2.48086e+06	2.80982e+06	3.35066e+06	1.76306e+06	280035	1.55326e+06	1.38723e+06	1.65475e+06	342881	464539	5.19103e+06	354748	0	0
	Q16610	ECM1_HUMAN	Extracellular matrix protein 1 (Secretory component p85)	0	0	0	473020	0	0	0	0	0	0	0	256351	708694	489485	1.85913e+06	1.75283e+06	0	0	0	934458	693174	0	2.17323e+06	0	0	1.23136e+06	915694	1.05509e+06	1.35383e+06	1.90102e+06	1223647	1.21118e+06	2.2241e+06	1.12324e+06	1.39065e+06	791147	596332	4.5786e+06	499206	308174	506476
	Q15113	PCOC1_HUMAN	Procollagen C-endopeptidase enhancer 1 (Procollagen COOH-terminal proteinase enhancer 1) (PCPE-1) (Procollagen C-proteinase enhancer 1) (Type 1 procollagen C-proteinase enhancer protein) (Type I procollagen COOH-terminal proteinase enhancer)	0	0	0	984371	0	0	0	0	0	0	0	0	342116	789534	964522	1.6631e+06	318755	0	0	876039	733841	0	1.74137e+06	0	0	931953	1.35129e+06	1.86743e+06	2.19071e+06	629166	0	1.03354e+06	4.72911e+06	0	1.05616e+06	1.22282e+06	1.22838e+06	5.75739e+06	0	0	0
	P31146	COR1A_HUMAN	Coronin-1A (Coronin-like protein A) (Clipin-A) (Coronin-like protein p57) (Tryptophan aspartate-containing coat protein) (TACO)	0	0	0	713990	0	0	0	0	0	0	0	188259	387614	299845	948217	1.06207e+06	0	0	0	798992	553567	0	947537	0	0	758582	2.81836e+06	3.06822e+06	1.02363e+06	671713	669133	1.14479e+06	0	368879	2.3848e+06	643045	0	1.01166e+07	335184	281386	317422
	P19957	ELAF_HUMAN	Elafin (Elastase-specific inhibitor) (ESI) (Peptidase inhibitor 3) (PI-3) (Protease inhibitor WAP3) (Skin-derived antileukoproteinase) (SKALP) (WAP four-disulfide core domain protein 14)	0	0	0	0	0	0	0	0	0	0	0	0	0	0	0	0	0	0	0	0	0	0	0	0	0	2.00592e+06	2.34872e+06	2.47018e+06	0	3.22671e+06	0	1.96669e+06	0	1.55108e+06	2.39025e+06	0	0	5.55481e+06	5.06766e+06	1.91441e+06	2.12121e+06
	O94985	CSTN1_HUMAN	Calsyntenin-1 (Alcadein-alpha) (Alc-alpha) (Alzheimer-related cadherin-like protein) (Non-classical cadherin XB31alpha) [Cleaved into: Soluble Alc-alpha (SAlc-alpha); CTF1-alpha (C-terminal fragment 1-alpha)]	0	0	0	606192	0	0	0	0	0	0	0	0	487367	360308	2.05487e+06	1.30121e+06	397544	350707	0	603913	497931	0	1.31239e+06	724439	486747	435393	761252	1.19331e+06	1.12701e+06	734998	785848	1.74728e+06	3.77193e+06	533192	1.85662e+06	1.08988e+06	1.32734e+06	4.5219e+06	294448	607126	819517
	P04264	K2C1_HUMAN	Keratin, type II cytoskeletal 1 (67 kDa cytokeratin) (Cytokeratin-1) (CK-1) (Hair alpha protein) (Keratin-1) (K1) (Type-II keratin Kb1)	300339	0	0	1.49076e+06	654417	0	0	0	0	359211	0	0	0	323519	911093	0	293154	640749	0	0	0	2.88136e+06	535943	1.10793e+06	1.6055e+06	3.66224e+06	400558	520653	2.19238e+06	1.49785e+06	641178	961899	750248	679511	199456	1.90109e+06	4.04321e+06	0	1.44809e+06	315496	516954
	Q9GZM5	YIPF3_HUMAN	Protein YIPF3 (Killer lineage protein 1) (Natural killer cell-specific antigen KLIP1) (YIP1 family member 3) [Cleaved into: Protein YIPF3, 36 kDa form III]	0	0	0	0	0	0	0	0	0	0	0	0	0	0	0	0	0	0	0	0	0	0	0	623922	0	0	0	1981852	2693020	0	1.31147e+06	3.73707e+06	6.106e+06	0	2.44982e+06	1.33419e+06	1.26435e+06	8.26797e+06	0	0	1385363
	P05164	PERM_HUMAN	Myeloperoxidase (MPO) (EC 1.11.2.2) [Cleaved into: Myeloperoxidase; 89 kDa myeloperoxidase; 84 kDa myeloperoxidase; Myeloperoxidase light chain; Myeloperoxidase heavy chain]	0	0	0	0	0	0	0	0	0	0	0	0	0	0	0	0	0	0	0	692067	498708	0	1.03176e+06	0	0	915858	2.05735e+06	2.44036e+06	2.47635e+06	2.82655e+06	1.22388e+06	1.62888e+06	556525	1.11067e+06	3.31388e+06	847563	0	5.84939e+06	3.19585e+06	409916	395862
	P07358	CO8B_HUMAN	Complement component C8 beta chain (Complement component 8 subunit beta)	933261	0	0	1.31258e+06	229793	0	0	0	0	0	0	0	0	0	0	0	0	0	0	557243	386986	284074	2.01232e+06	107993	0	2.11282e+06	1.32466e+06	1.50465e+06	1.47855e+06	2.82837e+06	2.93063e+06	478739	1.28817e+06	1.70044e+06	2.01826e+06	703647	443984	5.48006e+06	919589	193414	253939
	Q14118	DAG1_HUMAN	Dystroglycan (Dystrophin-associated glycoprotein 1) [Cleaved into: Alpha-dystroglycan (Alpha-DG); Beta-dystroglycan (Beta-DG)]	0	0	0	696174	0	0	0	0	0	0	0	0	779930	533581	1.69182e+06	1.57775e+06	0	343021	0	1.01678e+06	740039	0	1.64317e+06	306351	0	476075	934931	1.61052e+06	2.10741e+06	0	968703	1.382e+06	3.33504e+06	488858	1.65028e+06	821936	1.07931e+06	6.17392e+06	0	546033	892801
	P30041	PRDX6_HUMAN	Peroxiredoxin-6 (EC 1.11.1.15) (1-Cys peroxiredoxin) (1-Cys PRX) (24 kDa protein) (Acidic calcium-independent phospholipase A2) (aiPLA2) (EC 3.1.1.-) (Antioxidant protein 2) (Liver 2D page spot 40) (Non-selenium glutathione peroxidase) (NSGPx) (EC 1.11.1.9) (Red blood cells page spot 12)	0	0	0	2.67889e+06	0	0	909078	0	0	658335	0	914422	1.86968e+06	2.28288e+06	5253497	4.28797e+06	0	371059	1.0357e+06	1.56756e+06	966025	0	0	0	0	0	768758	695199	0	777163	867047	576540	0	536163	1.59861e+06	441150	0	2.39288e+06	424242	0	0
	P00488	F13A_HUMAN	Coagulation factor XIII A chain (Coagulation factor XIIIa) (EC 2.3.2.13) (Protein-glutamine gamma-glutamyltransferase A chain) (Transglutaminase A chain)	0	0	0	1.24623e+06	0	0	0	0	0	0	0	6.84666e+06	1.07927e+07	522722	952417	925071	0	0	0	5.96835e+06	355068	0	618406	0	0	438643	0	0	0	558091	0	0	469509	274302	1.30259e+06	0	0	744502	0	0	0
	P14174	MIF_HUMAN	Macrophage migration inhibitory factor (MIF) (EC 5.3.2.1) (Glycosylation-inhibiting factor) (GIF) (L-dopachrome isomerase) (L-dopachrome tautomerase) (EC 5.3.3.12) (Phenylpyruvate tautomerase)	0	0	0	4.03146e+06	0	0	0	0	0	401498	0	1.26455e+06	2.74398e+06	2.40577e+06	6.88372e+06	6.20672e+06	0	285284	0	4.69933e+06	2.14201e+06	0	0	0	0	0	0	0	0	0	0	0	0	0	0	0	0	0	1.05756e+06	0	0
	P05067	A4_HUMAN	Amyloid beta A4 protein (ABPP) (APPI) (APP) (Alzheimer disease amyloid protein) (Amyloid precursor protein) (Beta-amyloid precursor protein) (Cerebral vascular amyloid peptide) (CVAP) (PreA4) (Protease nexin-II) (PN-II) [Cleaved into: N-APP; Soluble APP-alpha (S-APP-alpha); Soluble APP-beta (S-APP-beta); C99; Beta-amyloid protein 42 (Beta-APP42); Beta-amyloid protein 40 (Beta-APP40); C83; P3(42);…	0	0	0	649033	0	0	0	0	0	0	0	0	200844	108998	811769	682792	286506	216496	0	597317	478643	343435	1.02414e+06	791981	791001	960053	1.09002e+06	1.65055e+06	1.86409e+06	1.67786e+06	1.58755e+06	2.11778e+06	4.30729e+06	754195	1.72889e+06	1.08807e+06	1.01838e+06	2826645	620218	807077	1.1115e+06
	P07333	CSF1R_HUMAN	Macrophage colony-stimulating factor 1 receptor (CSF-1 receptor) (CSF-1-R) (CSF-1R) (M-CSF-R) (EC 2.7.10.1) (Proto-oncogene c-Fms) (CD antigen CD115)	0	369001	0	1.07133e+06	0	0	0	0	0	0	0	217936	645839	547309	2.23243e+06	1.5856e+06	573842	420251	0	1.04333e+06	1.0303e+06	0	908278	401951	0	509334	892580	1.52947e+06	2.66173e+06	0	450777	1.48152e+06	2.25282e+06	1.37936e+06	1.89556e+06	1.47325e+06	698439	4.79916e+06	0	687778	927634
	P40925	MDHC_HUMAN	Malate dehydrogenase, cytoplasmic (EC 1.1.1.37) (Cytosolic malate dehydrogenase) (Diiodophenylpyruvate reductase) (EC 1.1.1.96)	0	0	0	1.64381e+06	0	0	627197	0	0	0	0	581370	1.55442e+06	1.24447e+06	4.32784e+06	3.62459e+06	0	0	0	1.51073e+06	842651	261733	0	0	0	502472	1.45059e+06	1.67799e+06	363115	1.06982e+06	920435	1.04428e+06	519106	434784	3.06147e+06	761317	193907	3.18612e+06	547771	331639	514288
	P02778	CXL10_HUMAN	C-X-C motif chemokine 10 (10 kDa interferon gamma-induced protein) (Gamma-IP10) (IP-10) (Small-inducible cytokine B10) [Cleaved into: CXCL10(1-73)]	0	0	0	0	0	0	0	0	0	0	0	0	0	0	0	0	0	0	0	0	0	0	2.0272e+06	0	0	0	4.57007e+06	4.8396e+06	0	8.27051e+06	0	0	0	0	0	0	0	1.21463e+07	0	617280	643720
	P30043	BLVRB_HUMAN	Flavin reductase (NADPH) (FR) (EC 1.5.1.30) (Biliverdin reductase B) (BVR-B) (EC 1.3.1.24) (Biliverdin-IX beta-reductase) (Green heme-binding protein) (GHBP) (NADPH-dependent diaphorase) (NADPH-flavin reductase) (FLR)	0	0	0	3.48486e+06	0	0	1.6524e+06	0	0	622771	0	1.34236e+06	2.82485e+06	2.64375e+06	8.57196e+06	7.31837e+06	0	0	0	1.98837e+06	1.23505e+06	0	0	0	0	0	0	0	0	0	0	0	0	0	1.4316e+06	0	0	0	0	0	0
	P22792	CPN2_HUMAN	Carboxypeptidase N subunit 2 (Carboxypeptidase N 83 kDa chain) (Carboxypeptidase N large subunit) (Carboxypeptidase N polypeptide 2) (Carboxypeptidase N regulatory subunit)	1.15232e+06	0	0	779853	638919	0	0	0	0	0	0	0	0	0	0	0	0	0	0	0	0	0	2.98707e+06	0	0	2.79544e+06	1.61298e+06	1.57839e+06	1.36265e+06	3.13071e+06	3.16206e+06	455520	1.18944e+06	1.67033e+06	2.49137e+06	594800	0	6.32001e+06	1.2091e+06	0	0
	P08493	MGP_HUMAN	Matrix Gla protein (MGP) (Cell growth-inhibiting gene 36 protein)	0	0	0	2.66276e+06	0	0	0	0	0	0	0	0	0	0	0	6.19009e+06	0	0	0	2.22029e+06	2.2216e+06	0	3834652	0	0	0	1.36173e+06	3.68892e+06	4.24234e+06	0	0	0	0	1.08393e+06	1.69285e+06	1.44851e+06	0	2.919e+06	0	0	0
	Q8WVQ1	CANT1_HUMAN	Soluble calcium-activated nucleotidase 1 (SCAN-1) (EC 3.6.1.6) (Apyrase homolog) (Putative MAPK-activating protein PM09) (Putative NF-kappa-B-activating protein 107)	0	0	0	0	0	0	0	0	0	0	0	0	0	0	0	0	0	0	0	0	0	0	0	0	0	0	0	0	0	0	0	0	3.37419e+07	0	0	0	0	0	0	0	0
	P60174	TPIS_HUMAN	Triosephosphate isomerase (TIM) (EC 5.3.1.1) (Triose-phosphate isomerase)	0	0	0	2.12353e+06	0	0	400827	0	0	367516	0	530222	1.42257e+06	1.39387e+06	4.28364e+06	3.67322e+06	0	436085	697478	1.73001e+06	888199	251950	439775	0	0	823299	1.41626e+06	1.18783e+06	385754	1.3772e+06	550629	839411	189670	616084	1.76453e+06	971202	174541	3.57282e+06	933362	224424	263473
	P05060	SCG1_HUMAN	Secretogranin-1 (Chromogranin-B) (CgB) (Secretogranin I) (SgI) [Cleaved into: PE-11; GAWK peptide; CCB peptide]	543569	211338	0	1.0265e+06	0	0	286201	0	0	442163	0	430480	846478	492926	1.3625e+06	1.19709e+06	323180	352628	0	869391	633363	485465	1.64326e+06	565499	456201	608367	662444	1.03452e+06	1.13216e+06	1.17867e+06	1.08447e+06	1.62727e+06	4.76431e+06	912061	1.63471e+06	1.60704e+06	1.76054e+06	2.54324e+06	516135	439797	473700
	Q12841	FSTL1_HUMAN	Follistatin-related protein 1 (Follistatin-like protein 1)	0	0	0	1.40491e+06	0	0	0	0	0	0	0	475747	1.06043e+06	989388	3.24596e+06	2.78522e+06	251718	0	0	1.34809e+06	1.12509e+06	179285	1.6481e+06	341813	244637	1.17597e+06	962833	1.82672e+06	2.65211e+06	721945	803479	757315	1.28047e+06	585300	1.64028e+06	374704	655279	4.35124e+06	374723	376931	631026
	P00558	PGK1_HUMAN	Phosphoglycerate kinase 1 (EC 2.7.2.3) (Cell migration-inducing gene 10 protein) (Primer recognition protein 2) (PRP 2)	0	0	0	1.29026e+06	0	0	0	0	0	0	0	199408	884026	581724	1.68937e+06	1.76437e+06	0	318688	0	1.38857e+06	742773	81551.7	746582	0	0	467679	2.91653e+06	2.52084e+06	754525	558316	741088	1.38567e+06	393713	247142	3.24782e+06	714674	0	9.50667e+06	386002	374190	480862
	Q96IY4	CBPB2_HUMAN	Carboxypeptidase B2 (EC 3.4.17.20) (Carboxypeptidase U) (CPU) (Plasma carboxypeptidase B) (pCPB) (Thrombin-activable fibrinolysis inhibitor) (TAFI)	860083	0	0	845254	0	0	0	0	0	0	0	0	0	0	0	655542	0	0	0	663645	273549	0	1.41283e+06	344987	332876	4.39668e+06	2.04444e+06	2.3012e+06	3.23625e+06	2.59343e+06	1.96533e+06	657599	2.14005e+06	1.17826e+06	935472	501211	526149	4.48096e+06	996595	341175	710067
	P05543	THBG_HUMAN	Thyroxine-binding globulin (Serpin A7) (T4-binding globulin)	646641	0	0	935447	274827	0	0	0	0	0	0	0	0	0	509955	675135	409312	0	0	577992	736558	204205	2.85517e+06	235600	0	1.87913e+06	1.47158e+06	1.99358e+06	1.85602e+06	2.37336e+06	2.49943e+06	794421	1.29524e+06	1.83988e+06	2.48479e+06	999633	496324	4.66642e+06	1.08384e+06	279389	360166
	P02743	SAMP_HUMAN	Serum amyloid P-component (SAP) (9.5S alpha-1-glycoprotein) [Cleaved into: Serum amyloid P-component(1-203)]	2.07661e+06	0	0	1.1325e+06	369287	0	0	0	0	0	0	0	0	0	0	872059	0	0	0	489011	335176	0	0	0	0	9.47397e+06	601506	0	0	1.26533e+07	0	0	0	4.36254e+06	0	0	0	0	2.35612e+06	0	0
	P10124	SRGN_HUMAN	Serglycin (Hematopoietic proteoglycan core protein) (Platelet proteoglycan core protein) (P.PG) (Secretory granule proteoglycan core protein)	0	0	0	0	0	0	0	0	0	0	0	0	0	0	0	0	0	0	0	0	0	0	2.57661e+06	0	0	2.16172e+06	1.0904e+06	1.11979e+06	849040	7453160	5.06661e+06	677605	626802	3.2391e+06	1.9804e+06	0	0	4.35346e+06	3.53496e+06	273983	343372
	P07357	CO8A_HUMAN	Complement component C8 alpha chain (Complement component 8 subunit alpha)	756800	0	0	1.07574e+06	0	0	0	0	0	0	0	0	165818	148126	620901	493247	0	0	0	418690	287268	0	3.01312e+06	178721	0	2.04372e+06	1.6583e+06	1.80702e+06	1.86691e+06	3.70305e+06	3.15303e+06	451351	1.53797e+06	1.94675e+06	2.36925e+06	533332	443591	6.2794e+06	734737	193372	192805
	Q06830	PRDX1_HUMAN	Peroxiredoxin-1 (EC 1.11.1.15) (Natural killer cell-enhancing factor A) (NKEF-A) (Proliferation-associated gene protein) (PAG) (Thioredoxin peroxidase 2) (Thioredoxin-dependent peroxide reductase 2)	0	0	0	4.48198e+06	0	0	494548	0	0	0	0	1.02293e+06	3.31222e+06	3.00763e+06	9.33154e+06	7.58172e+06	0	0	0	2.24498e+06	954654	0	0	0	0	0	0	0	0	0	637297	0	0	0	2.61631e+06	0	0	0	657268	0	0
	P63261	ACTG_HUMAN	Actin, cytoplasmic 2 (Gamma-actin) [Cleaved into: Actin, cytoplasmic 2, N-terminally processed]	0	0	0	0	0	0	0	0	0	0	0	0	0	0	0	0	0	0	0	0	0	0	0	0	0	0	5.82839e+06	5.57914e+06	0	0	0	0	0	0	4.49386e+06	0	0	2.04525e+07	0	0	0
	Q08380	LG3BP_HUMAN	Galectin-3-binding protein (Basement membrane autoantigen p105) (Lectin galactoside-binding soluble 3-binding protein) (Mac-2-binding protein) (MAC2BP) (Mac-2 BP) (Tumor-associated antigen 90K)	758864	351408	0	1.31819e+06	208326	0	0	0	0	382132	0	552101	1.22366e+06	1.05502e+06	2.73796e+06	2.27013e+06	789932	706129	0	1.294e+06	1.36445e+06	1.20045e+06	860347	653007	409602	1.47204e+06	549567	895160	1.56211e+06	1.81964e+06	775349	999917	1.72746e+06	1.40597e+06	1.03462e+06	703759	1.71298e+06	1.75423e+06	725592	510103	636695
	P13987	CD59_HUMAN	CD59 glycoprotein (1F5 antigen) (20 kDa homologous restriction factor) (HRF-20) (HRF20) (MAC-inhibitory protein) (MAC-IP) (MEM43 antigen) (Membrane attack complex inhibition factor) (MACIF) (Membrane inhibitor of reactive lysis) (MIRL) (Protectin) (CD antigen CD59)	0	0	0	0	0	0	0	0	0	0	0	0	0	0	0	0	0	0	0	0	470222	381465	1.77447e+06	1.70224e+06	0	460227	964004	1.92705e+06	2.15626e+06	1.18868e+06	1.6975e+06	3.13267e+06	7.18878e+06	713941	2928037	1.10937e+06	1.50117e+06	4.93876e+06	502544	718372	1124675
	Q9HD89	RETN_HUMAN	Resistin (Adipose tissue-specific secretory factor) (ADSF) (C/EBP-epsilon-regulated myeloid-specific secreted cysteine-rich protein) (Cysteine-rich secreted protein A12-alpha-like 2) (Cysteine-rich secreted protein FIZZ3)	0	0	0	0	0	0	0	0	0	0	0	0	0	0	0	0	0	0	0	907751	582227	0	0	0	0	0	1.44869e+06	2.63584e+06	0	4.98871e+06	3.3431e+06	1.53354e+06	0	0	0	778967	0	1.61282e+07	3.18927e+06	598467	547609
	P02452	CO1A1_HUMAN	Collagen alpha-1(I) chain (Alpha-1 type I collagen)	0	0	0	1.23597e+06	0	0	0	0	0	97423.6	0	444177	985409	1.08644e+06	4.27048e+06	3.20287e+06	316396	0	0	1.66261e+06	1.33748e+06	0	1043435	195090	0	2.17864e+06	1.7959e+06	3.3812e+06	4.27798e+06	0	0	791194	2.58009e+06	364562	1.55342e+06	864290	536847	2.6987e+06	0	0	287180
	P08311	CATG_HUMAN	Cathepsin G (CG) (EC 3.4.21.20)	0	0	0	0	0	0	0	0	0	0	0	0	0	0	0	0	0	0	0	0	0	0	2.33854e+06	0	0	448331	6.49898e+06	3.51307e+06	2.12599e+06	3.14858e+06	3.00628e+06	2.0845e+06	0	0	3.02943e+06	490253	0	9.00409e+06	1.33678e+06	202360	0
	P22894	MMP8_HUMAN	Neutrophil collagenase (EC 3.4.24.34) (Matrix metalloproteinase-8) (MMP-8) (PMNL collagenase) (PMNL-CL)	0	0	0	0	0	0	0	0	0	0	0	0	0	0	0	0	0	0	0	529664	312755	0	2.21945e+06	0	0	1.52156e+06	2.41111e+06	1.97482e+06	0	6.54642e+06	5.16703e+06	962453	0	1.23638e+06	1.55545e+06	320325	0	5.36467e+06	6.4741e+06	541105	188430
	P10599	THIO_HUMAN	Thioredoxin (Trx) (ATL-derived factor) (ADF) (Surface-associated sulphydryl protein) (SASP)	0	0	0	3.49425e+06	0	0	0	0	0	0	0	683606	2.24732e+06	2.08417e+06	4674456	3.56184e+06	0	0	187580	2.16624e+06	927736	0	6.42587e+06	0	0	0	1.84329e+06	1.77234e+06	0	0	0	1.51643e+06	0	0	2.64119e+06	740045	0	2.85806e+06	0	0	442950
	P09382	LEG1_HUMAN	Galectin-1 (Gal-1) (14 kDa laminin-binding protein) (HLBP14) (14 kDa lectin) (Beta-galactoside-binding lectin L-14-I) (Galaptin) (HBL) (HPL) (Lactose-binding lectin 1) (Lectin galactoside-binding soluble 1) (Putative MAPK-activating protein PM12) (S-Lac lectin 1)	0	0	0	3051918	0	0	0	0	0	0	0	317681	1.92589e+06	1.34546e+06	5.04251e+06	4.96081e+06	0	111188	0	3.19129e+06	1.00428e+06	0	0	0	0	484257	1.53545e+06	1.51252e+06	732068	1.28865e+06	838027	567689	955642	0	1.44103e+06	258295	140211	7.48918e+06	0	0	276679
	P13671	CO6_HUMAN	Complement component C6	795961	0	0	1.75589e+06	279027	0	0	0	0	0	0	0	0	0	0	0	0	0	0	920677	660548	0	2.76055e+06	356847	0	3.57687e+06	2.0309e+06	2.18161e+06	2.36324e+06	4.60103e+06	2.97043e+06	923360	1.45255e+06	1.787e+06	1.85092e+06	602040	246897	5.0245e+06	979946	204759	306451
	P13645	K1C10_HUMAN	Keratin, type I cytoskeletal 10 (Cytokeratin-10) (CK-10) (Keratin-10) (K10)	411430	0	0	932724	331874	0	0	0	0	180193	0	202409	214404	326454	1.20976e+06	347133	0	531602	0	0	0	1.94277e+06	0	821735	2.30209e+06	2.87142e+06	1.14769e+07	0	1.1769e+06	1.6537e+06	671106	1.7096e+06	712305	2.18677e+06	280028	1.60426e+06	2.34986e+06	0	1.17955e+06	357195	797344
	P17900	SAP3_HUMAN	Ganglioside GM2 activator (Cerebroside sulfate activator protein) (GM2-AP) (Sphingolipid activator protein 3) (SAP-3) [Cleaved into: Ganglioside GM2 activator isoform short]	0	949696	0	1.07101e+06	0	0	0	0	0	0	0	229294	743741	484154	2.0824e+06	1.72023e+06	595601	431577	0	906813	684612	0	1.27426e+06	190717	138341	1.03909e+06	1.49552e+06	2.19685e+06	2.3032e+06	1.4905e+06	1.00774e+06	1.7845e+06	4.49717e+06	947942	1.96711e+06	1.12027e+06	1.49246e+06	4.95564e+06	394649	346356	682828
	P62942	FKB1A_HUMAN	Peptidyl-prolyl cis-trans isomerase FKBP1A (PPIase FKBP1A) (EC 5.2.1.8) (12 kDa FK506-binding protein) (12 kDa FKBP) (FKBP-12) (Calstabin-1) (FK506-binding protein 1A) (FKBP-1A) (Immunophilin FKBP12) (Rotamase)	0	0	0	2.61722e+06	0	0	0	0	0	0	0	458283	1709066	1.43217e+06	5.44903e+06	5.17771e+06	0	0	0	2.49834e+06	1.52713e+06	0	0	0	0	0	2.30095e+06	2.90949e+06	1.22482e+06	0	0	1.22289e+06	0	0	3.5138e+06	1.17658e+06	0	5.10842e+06	488965	247452	337297
	P78417	GSTO1_HUMAN	Glutathione S-transferase omega-1 (GSTO-1) (EC 2.5.1.18) (Glutathione S-transferase omega 1-1) (GSTO 1-1) (Glutathione-dependent dehydroascorbate reductase) (EC 1.8.5.1) (Monomethylarsonic acid reductase) (MMA(V) reductase) (EC 1.20.4.2) (S-(Phenacyl)glutathione reductase) (SPG-R)	0	0	0	2187598	0	0	498032	0	0	276556	0	708806	2.1467e+06	1.74264e+06	6.3769e+06	5.19682e+06	0	0	0	2.51474e+06	1.2981e+06	0	0	0	0	407325	1.73117e+06	2.2138e+06	795840	0	0	996269	587203	0	2.1672e+06	631909	0	6.52499e+06	218734	168868	282388
	Q9Y5Y7	LYVE1_HUMAN	Lymphatic vessel endothelial hyaluronic acid receptor 1 (LYVE-1) (Cell surface retention sequence-binding protein 1) (CRSBP-1) (Extracellular link domain-containing protein 1) (Hyaluronic acid receptor)	0	312807	222261	2.35477e+06	0	0	0	0	0	283238	0	576238	1.77598e+06	1.3985e+06	4.1412e+06	3765576	0	0	0	2.50824e+06	2.24034e+06	0	1.40191e+06	280657	0	1.48255e+06	1.05864e+06	1.63256e+06	1.92399e+06	843295	520332	1.26161e+06	1.16281e+06	0	945092	1.09084e+06	856862	6.18571e+06	0	118991	0
	P52566	GDIR2_HUMAN	Rho GDP-dissociation inhibitor 2 (Rho GDI 2) (Ly-GDI) (Rho-GDI beta)	0	0	0	1.26572e+06	0	0	0	0	0	0	0	0	0	772990	2.88391e+06	1.94504e+06	0	0	0	1.157e+06	484727	0	980602	0	0	1.07906e+06	3.30075e+06	3.58238e+06	850567	1.48843e+06	747829	1.50234e+06	0	629472	2.86023e+06	700206	0	1.24483e+07	560882	667440	679206
	P07360	CO8G_HUMAN	Complement component C8 gamma chain	938027	0	0	1.64119e+06	210303	0	0	0	0	0	0	0	0	0	0	0	0	0	0	0	462180	0	2.34961e+06	0	0	2.60814e+06	1.44535e+06	1.60244e+06	1.80191e+06	8.18292e+06	3.53758e+06	784950	1.68577e+06	2.28155e+06	2.3767e+06	798438	509525	7.2469e+06	998688	0	0
	P62937	PPIA_HUMAN	Peptidyl-prolyl cis-trans isomerase A (PPIase A) (EC 5.2.1.8) (Cyclophilin A) (Cyclosporin A-binding protein) (Rotamase A) [Cleaved into: Peptidyl-prolyl cis-trans isomerase A, N-terminally processed]	0	0	0	2.15988e+06	0	0	0	0	0	402880	0	471032	689024	997565	1.96807e+06	2.24355e+06	0	260449	0	1.52191e+06	946289	0	1.12755e+06	0	0	1.03611e+06	2663026	3.58949e+06	917014	1.17314e+06	1.0705e+06	1.56245e+06	712775	731023	3.6477e+06	1.3746e+06	0	8.96381e+06	747481	284768	467020
	P09211	GSTP1_HUMAN	Glutathione S-transferase P (EC 2.5.1.18) (GST class-pi) (GSTP1-1)	0	0	0	989555	0	0	0	0	0	0	0	451431	757344	933721	1.3483e+06	1.81925e+06	0	481310	0	1.20892e+06	490963	151808	1.0071e+06	0	0	1.00092e+06	3.31077e+06	2.72444e+06	517123	2.10548e+06	1.49377e+06	925008	643556	568166	4.04668e+06	624585	0	1.22731e+07	1.10851e+06	419024	542946
	P13591	NCAM1_HUMAN	Neural cell adhesion molecule 1 (N-CAM-1) (NCAM-1) (CD antigen CD56)	331646	515334	0	1.1825e+06	0	0	0	0	0	481314	0	519442	925177	402663	1.35438e+06	1.45968e+06	826675	739688	0	1.07696e+06	826798	285116	1.54592e+06	508694	354649	854642	1.04783e+06	1.46364e+06	1.67222e+06	879342	1.13055e+06	2.16234e+06	5.37206e+06	910390	2.36662e+06	1.537e+06	1.20236e+06	5.47869e+06	606698	714875	1.38671e+06
	P36980	FHR2_HUMAN	Complement factor H-related protein 2 (FHR-2) (DDESK59) (H factor-like 3) (H factor-like protein 2)	0	0	0	373607	0	0	0	0	0	0	0	0	0	0	656157	631593	0	0	0	0	0	0	3.13777e+06	467680	0	3.24749e+06	1.87848e+06	2.56031e+06	3.59714e+06	6.38059e+06	4.16517e+06	1.1439e+06	2.36102e+06	1.82641e+06	2.68877e+06	601980	383053	4.51078e+06	756173	392021	564151
	P13611	CSPG2_HUMAN	Versican core protein (Chondroitin sulfate proteoglycan core protein 2) (Chondroitin sulfate proteoglycan 2) (Glial hyaluronate-binding protein) (GHAP) (Large fibroblast proteoglycan) (PG-M)	0	0	0	1.40164e+06	0	0	0	0	0	0	0	351216	887231	800678	3.14821e+06	2.99317e+06	0	0	0	1.28383e+06	665960	0	758604	0	0	577371	1.67703e+06	2.57941e+06	888720	3.44359e+06	1.62365e+06	1.54558e+06	1.11098e+06	1.50759e+06	3.51436e+06	1.07762e+06	501560	8.05918e+06	669531	367582	1.01773e+06
	Q01469	FABP5_HUMAN	Fatty acid-binding protein, epidermal (Epidermal-type fatty acid-binding protein) (E-FABP) (Fatty acid-binding protein 5) (Psoriasis-associated fatty acid-binding protein homolog) (PA-FABP)	0	0	0	4.60375e+06	0	0	0	0	0	690853	0	1.46045e+06	3.74365e+06	3.66163e+06	8.24605e+06	8.19301e+06	0	0	0	4.68851e+06	2.54186e+06	0	0	0	0	0	1.00459e+06	1.14702e+06	0	0	0	0	0	0	2.4769e+06	0	0	0	0	0	0
	P63313	TYB10_HUMAN	Thymosin beta-10	0	0	0	4.00498e+06	0	0	0	0	0	0	0	0	2.21495e+06	1.75989e+06	5.3291e+06	5.77038e+06	0	199565	0	3477636	1.93212e+06	0	0	0	0	0	1.41165e+06	1.23867e+06	654704	0	496956	1.04002e+06	805940	0	2.52507e+06	471598	0	8.1927e+06	442443	202002	442262
	P37837	TALDO_HUMAN	Transaldolase (EC 2.2.1.2)	0	0	0	1.79614e+06	0	0	0	0	0	0	0	465244	1.13077e+06	1.17613e+06	4.06269e+06	3.83151e+06	0	0	0	1.94187e+06	1.25767e+06	0	0	0	0	483437	3.47045e+06	3.16483e+06	1.42409e+06	0	739426	1.82625e+06	0	0	3.89529e+06	846119	0	9.71348e+06	686463	330049	446115
	P04114	APOB_HUMAN	Apolipoprotein B-100 (Apo B-100) [Cleaved into: Apolipoprotein B-48 (Apo B-48)]	3.24611e+06	517845	0	1.14012e+06	541030	0	0	0	0	0	0	0	555628	0	0	0	443673	0	0	386611	304582	0	2.39447e+06	399773	0	5.42856e+06	2.2984e+06	2.13657e+06	1.31661e+06	4.63789e+06	3.27462e+06	707856	706248	2.25228e+06	2.23931e+06	756235	0	5.45835e+06	1.61e+06	0	0
	P52209	6PGD_HUMAN	6-phosphogluconate dehydrogenase, decarboxylating (EC 1.1.1.44)	0	0	0	1.00418e+06	0	0	0	0	0	225162	0	313044	605523	549161	2.07984e+06	1.74548e+06	0	268795	502854	1.41157e+06	644600	0	1.51607e+06	0	0	644958	3.24269e+06	3.67884e+06	2.49273e+06	724541	1.53602e+06	1.10909e+06	2.2185e+06	332083	3.98397e+06	664325	0	1.04886e+07	232928	315163	324985
	P14136	GFAP_HUMAN	Glial fibrillary acidic protein (GFAP)	445539	0	0	0	265979	0	0	0	0	0	0	0	0	0	0	0	0	0	0	0	0	0	0	177876	0	947875	689198	562808	0	5.96698e+06	0	991490	0	3.86191e+06	1.22604e+07	1.83462e+06	0	1.2146e+07	858126	841585	1.30893e+06
	P07195	LDHB_HUMAN	L-lactate dehydrogenase B chain (LDH-B) (EC 1.1.1.27) (LDH heart subunit) (LDH-H) (Renal carcinoma antigen NY-REN-46)	0	0	0	2.37508e+06	0	0	438212	0	0	249573	0	791183	1.97534e+06	1.66528e+06	5.15696e+06	4.50549e+06	0	458164	448807	1.84996e+06	1.4412e+06	176072	453056	156658	0	722492	1.47129e+06	1.8998e+06	1.21416e+06	1.44168e+06	1.11302e+06	1.77541e+06	1.19424e+06	680661	3.13795e+06	979152	296150	4.12404e+06	568768	347718	536305
	P05452	TETN_HUMAN	Tetranectin (TN) (C-type lectin domain family 3 member B) (Plasminogen kringle 4-binding protein)	0	0	0	1.06728e+06	111577	0	0	0	0	0	0	180125	600413	455327	1.25506e+06	1.1526e+06	449259	348384	0	1.06016e+06	703883	0	3.37959e+06	405757	330726	1.38316e+06	1.42678e+06	2.11439e+06	2.73781e+06	2.45213e+06	1.64148e+06	1.57294e+06	4.4825e+06	1.11103e+06	3.2216e+06	955949	1.05809e+06	6.55749e+06	477779	401172	569831
	P06681	CO2_HUMAN	Complement C2 (EC 3.4.21.43) (C3/C5 convertase) [Cleaved into: Complement C2b fragment; Complement C2a fragment]	567159	684541	0	914765	0	0	0	0	0	0	0	201512	692990	270036	753689	1.1782e+06	274522	0	0	691125	984698	141044	2.58653e+06	219475	0	2.72084e+06	1.67083e+06	2.82655e+06	3.18385e+06	2.88593e+06	2.46264e+06	1.36924e+06	2.98634e+06	1.04274e+06	1.56158e+06	683955	606217	7.44221e+06	1.0419e+06	454987	701817
	P22692	IBP4_HUMAN	Insulin-like growth factor-binding protein 4 (IBP-4) (IGF-binding protein 4) (IGFBP-4)	0	0	0	1.36149e+06	0	0	0	0	0	0	0	0	1.24155e+06	1.11474e+06	1.81075e+06	2.80694e+06	0	0	0	1.20449e+06	730925	0	2.89141e+06	303457	0	1.1293e+06	1.74011e+06	3.53838e+06	2.70968e+06	969177	1.20865e+06	1.20025e+06	2.3941e+06	951224	2.59631e+06	991569	1.04157e+06	8.91253e+06	0	442202	585771
	P16401	H15_HUMAN	Histone H1.5 (Histone H1a) (Histone H1b) (Histone H1s-3)	0	0	0	0	0	0	0	0	0	0	0	0	0	0	2.83087e+06	0	0	0	0	1.53594e+06	973236	0	845341	0	0	0	7.78756e+06	9.19192e+06	2.13247e+06	406919	0	3.75986e+06	0	0	7.35433e+06	1.24412e+06	0	4.76813e+06	242272	651510	668598
	O15144	ARPC2_HUMAN	Actin-related protein 2/3 complex subunit 2 (Arp2/3 complex 34 kDa subunit) (p34-ARC)	0	0	0	0	0	0	0	0	0	0	0	0	0	0	0	0	0	0	0	300401	0	0	0	0	0	1.63694e+07	4.7034e+06	845256	0	0	1.07354e+07	3.14283e+06	0	0	492625	0	0	8.53587e+06	0	0	0
	P20774	MIME_HUMAN	Mimecan (Osteoglycin) (Osteoinductive factor) (OIF)	0	243038	258092	2.09893e+06	0	0	0	0	0	0	0	268076	1.19458e+06	886212	2.5656e+06	3.49292e+06	206002	0	0	1.35245e+06	1.14566e+06	0	2.69698e+06	0	0	1.5019e+06	1.5249e+06	2.40306e+06	2.34549e+06	909432	975296	717643	5.99257e+06	702622	907686	816459	1.93024e+06	7.8394e+06	0	0	267834
	Q96PD5	PGRP2_HUMAN	N-acetylmuramoyl-L-alanine amidase (EC 3.5.1.28) (Peptidoglycan recognition protein 2) (Peptidoglycan recognition protein long) (PGRP-L)	1.06143e+06	302556	0	881438	387841	0	0	0	0	263451	0	0	231616	263012	588400	714664	404851	0	0	591087	490071	0	5.06212e+06	183584	0	3.09564e+06	2.31103e+06	2.53562e+06	3.70495e+06	4.64109e+06	3.38901e+06	744634	2.22602e+06	1.56661e+06	2.11655e+06	726524	546822	5.73338e+06	886688	86329.1	210759
	O14791	APOL1_HUMAN	Apolipoprotein L1 (Apolipoprotein L) (Apo-L) (ApoL) (Apolipoprotein L-I) (ApoL-I)	1.80765e+06	0	0	0	0	0	0	0	0	0	0	0	0	0	0	0	0	0	0	0	0	0	6.10321e+06	0	0	3.8482e+06	2.632e+06	2.65425e+06	1.75178e+06	8.3112e+06	6.93975e+06	0	1.05231e+06	2.22481e+06	2.5944e+06	695522	244516	3.50386e+06	1.35377e+06	0	236004
	P01031	CO5_HUMAN	Complement C5 (C3 and PZP-like alpha-2-macroglobulin domain-containing protein 4) [Cleaved into: Complement C5 beta chain; Complement C5 alpha chain; C5a anaphylatoxin; Complement C5 alpha' chain]	1.09135e+06	0	0	1.43446e+06	293363	0	0	0	0	0	0	0	452187	370294	948414	1.0219e+06	323550	0	0	853496	623754	213107	3.05345e+06	172819	0	4.44523e+06	2.26806e+06	2.56544e+06	2.6722e+06	4.25444e+06	3.43012e+06	517646	2.06895e+06	2.55559e+06	3.04439e+06	727493	378492	4.70972e+06	1.36873e+06	233200	362804
	P00748	FA12_HUMAN	Coagulation factor XII (EC 3.4.21.38) (Hageman factor) (HAF) [Cleaved into: Coagulation factor XIIa heavy chain; Beta-factor XIIa part 1; Coagulation factor XIIa light chain (Beta-factor XIIa part 2)]	1.02034e+06	0	0	804149	199910	0	0	0	0	0	0	0	330865	270894	0	785806	263213	0	0	697598	688404	0	5.87307e+06	236460	0	4.28954e+06	3.00933e+06	3.93508e+06	4.2641e+06	2.94329e+06	2.05362e+06	559471	1.94406e+06	1.69009e+06	2.39845e+06	616907	798900	6.32163e+06	385856	0	198226
	P00338	LDHA_HUMAN	L-lactate dehydrogenase A chain (LDH-A) (EC 1.1.1.27) (Cell proliferation-inducing gene 19 protein) (LDH muscle subunit) (LDH-M) (Renal carcinoma antigen NY-REN-59)	0	0	0	1.74318e+06	0	0	223152	0	0	0	0	579883	1.37602e+06	1.38669e+06	4.03667e+06	4.83992e+06	0	0	0	2.67544e+06	1.42299e+06	0	0	0	0	1.16542e+06	3.22664e+06	4314389	1.43798e+06	1.56372e+06	0	1.68291e+06	625463	597269	3.25325e+06	834421	0	8.82416e+06	459264	263576	301473
	P23528	COF1_HUMAN	Cofilin-1 (18 kDa phosphoprotein) (p18) (Cofilin, non-muscle isoform)	0	0	0	1.61926e+06	0	0	0	0	0	405301	0	0	1.35642e+06	1.1194e+06	3.29357e+06	3.18986e+06	0	220545	203575	1.38712e+06	863052	103571	1.82568e+06	0	0	754390	3.84743e+06	4.24265e+06	0	1.23325e+06	1.74907e+06	1.5163e+06	0	741169	3.45742e+06	1.10305e+06	0	1.13521e+07	457248	497123	538552
	Q9Y279	VSIG4_HUMAN	V-set and immunoglobulin domain-containing protein 4 (Protein Z39Ig)	0	0	214078	2.5222e+06	0	0	0	0	0	0	0	907346	732643	987345	2.9569e+06	3.5017e+06	391692	358266	0	2.75043e+06	2.27123e+06	0	0	311051	0	719344	825916	2069582	3.14535e+06	195062	0	4.03613e+06	1.26809e+06	491950	3.36165e+06	3.21191e+06	512077	5.37565e+06	0	1.45107e+06	2.58156e+06
	Q9UHG2	PCSK1_HUMAN	ProSAAS (Proprotein convertase subtilisin/kexin type 1 inhibitor) (Proprotein convertase 1 inhibitor) (pro-SAAS) [Cleaved into: KEP; Big SAAS (b-SAAS); Little SAAS (l-SAAS) (N-proSAAS); Big PEN-LEN (b-PEN-LEN) (SAAS CT(1-49)); PEN; Little LEN (l-LEN); Big LEN (b-LEN) (SAAS CT(25-40))]	258059	0	0	1.37989e+06	0	0	263927	0	0	248361	0	364511	969836	714977	2.6425e+06	2.4268e+06	823568	746331	0	1.38947e+06	1.19638e+06	709644	2.24398e+06	995052	1.36316e+06	481714	933417	1.66871e+06	1.98447e+06	1.57786e+06	1.13295e+06	2.65446e+06	6.33369e+06	809065	2.14603e+06	1.05318e+06	1.10611e+06	4.44794e+06	504665	676623	1.38449e+06
	P07225	PROS_HUMAN	Vitamin K-dependent protein S	822016	0	0	1.37473e+06	296259	0	0	0	0	193699	0	0	544192	685590	1.0944e+06	1.66863e+06	429005	268195	0	1.03647e+06	944188	263490	2.9656e+06	672133	303610	3.45737e+06	1.97253e+06	2.3061e+06	2.70832e+06	4.65797e+06	2.93552e+06	1.36206e+06	2.05171e+06	1.92946e+06	2.16352e+06	726155	1.03043e+06	4.52387e+06	1.01177e+06	533356	868286
	P08670	VIME_HUMAN	Vimentin	0	0	0	2.51892e+06	0	0	0	0	0	388474	0	864160	1.87431e+06	1.51424e+06	3.88549e+06	3.37699e+06	0	842790	413203	2.73835e+06	1.46521e+06	0	746908	0	0	1.68653e+06	2.27282e+06	2.24698e+06	795682	6.35271e+06	1.27442e+06	1.52048e+06	295060	716468	2.50802e+06	385416	0	6.64142e+06	1.37459e+06	297280	433405
	Q86VB7	C163A_HUMAN	Scavenger receptor cysteine-rich type 1 protein M130 (Hemoglobin scavenger receptor) (CD antigen CD163) [Cleaved into: Soluble CD163 (sCD163)]	0	0	0	1.31359e+06	0	0	0	0	0	0	0	158764	472322	424563	1.74522e+06	1.70134e+06	0	263165	0	1.18299e+06	937780	0	543655	325910	150697	1.45818e+06	1.32795e+06	2.66038e+06	5.66934e+06	610016	312954	5.73033e+06	4.13892e+06	418378	4.37062e+06	3.55492e+06	779677	7.09411e+06	258576	767780	1.6953e+06
	P02788	TRFL_HUMAN	Lactotransferrin (Lactoferrin) (EC 3.4.21.-) (Growth-inhibiting protein 12) (Talalactoferrin) [Cleaved into: Lactoferricin-H (Lfcin-H); Kaliocin-1; Lactoferroxin-A; Lactoferroxin-B; Lactoferroxin-C]	0	0	0	885768	208838	0	0	262140	0	159944	0	158874	587470	399385	1.70066e+06	1.68438e+06	0	112317	411181	908111	688416	574171	2.99476e+06	264651	0	1.73063e+06	373861	722951	1.07477e+06	1.50747e+07	2.55609e+06	1.77588e+06	457805	1.68392e+06	2.33426e+06	903222	0	3.11209e+06	6.81694e+06	339681	343039
	P51884	LUM_HUMAN	Lumican (Keratan sulfate proteoglycan lumican) (KSPG lumican)	1.42367e+06	309692	0	1.61548e+06	0	0	0	0	0	409122	0	435557	870468	1.21364e+06	3.066e+06	3.39464e+06	510208	418392	0	1.3464e+06	1.33641e+06	0	3.65328e+06	324297	0	2.21333e+06	1.82722e+06	2.59187e+06	3.00162e+06	2.19313e+06	1.75494e+06	1.05268e+06	2.65563e+06	1.46511e+06	2.37492e+06	930392	862905	7.29139e+06	464386	0	348488
	O75594	PGRP1_HUMAN	Peptidoglycan recognition protein 1 (Peptidoglycan recognition protein short) (PGRP-S)	0	0	0	0	0	0	0	0	0	0	0	0	0	0	119128	0	0	0	0	327254	0	0	3.4586e+06	115810	0	2.79884e+06	4.05422e+06	4.89764e+06	1.06294e+06	1.04513e+07	7.03629e+06	2.01576e+06	0	1.80597e+06	4.74167e+06	1.25771e+06	0	4.19078e+06	3.42537e+06	294941	0
	P02654	APOC1_HUMAN	Apolipoprotein C-I (Apo-CI) (ApoC-I) (Apolipoprotein C1) [Cleaved into: Truncated apolipoprotein C-I]	1.29491e+06	0	0	1.38738e+06	556425	0	0	0	0	0	0	0	0	494673	1.03995e+06	1.07972e+06	222580	0	0	527369	395811	0	6.43241e+06	0	0	4.95494e+06	2.9966e+06	2.76362e+06	3.5603e+06	4.65113e+06	6.3399e+06	0	1.94287e+06	1.80771e+06	1.50928e+06	479808	458288	7.75677e+06	802492	0	0
	P13796	PLSL_HUMAN	Plastin-2 (L-plastin) (LC64P) (Lymphocyte cytosolic protein 1) (LCP-1)	0	0	0	1.22245e+06	0	0	0	0	0	0	0	345677	1.02922e+06	900129	2.94991e+06	3.32965e+06	0	306129	1.02701e+06	2.34272e+06	1.35966e+06	0	889512	0	0	909598	3.58681e+06	5.67731e+06	3.03006e+06	971186	692088	2.90591e+06	724307	435508	4.4483e+06	2.03502e+06	0	1.10821e+07	574136	421184	519956
	P08246	ELNE_HUMAN	Neutrophil elastase (EC 3.4.21.37) (Bone marrow serine protease) (Elastase-2) (Human leukocyte elastase) (HLE) (Medullasin) (PMN elastase)	0	0	0	0	0	0	0	0	0	0	0	0	0	0	0	713310	0	0	0	308076	262366	0	739822	0	0	517887	4.03585e+06	5.65514e+06	2.83958e+06	2.17333e+06	1.85676e+06	1.40766e+06	0	1.11546e+06	4.26268e+06	1.55734e+06	0	2.20379e+07	3.77112e+06	416920	246447
	P14618	KPYM_HUMAN	Pyruvate kinase PKM (EC 2.7.1.40) (Cytosolic thyroid hormone-binding protein) (CTHBP) (Opa-interacting protein 3) (OIP-3) (Pyruvate kinase 2/3) (Pyruvate kinase muscle isozyme) (Thyroid hormone-binding protein 1) (THBP1) (Tumor M2-PK) (p58)	0	0	0	2.47659e+06	144860	0	0	0	0	0	0	323605	1.67004e+06	552499	2.00271e+06	2.32357e+06	409544	696410	0	1.30904e+06	681044	830405	1.10401e+06	1.61096e+06	0	1.00985e+06	4.46386e+06	2.9337e+06	1.11154e+06	1.48348e+06	1.21896e+06	1.71504e+06	1.55705e+06	804872	9.46083e+06	868876	1.65159e+06	9.51882e+06	642182	687833	926088
	P06733	ENOA_HUMAN	Alpha-enolase (EC 4.2.1.11) (2-phospho-D-glycerate hydro-lyase) (C-myc promoter-binding protein) (Enolase 1) (MBP-1) (MPB-1) (Non-neural enolase) (NNE) (Phosphopyruvate hydratase) (Plasminogen-binding protein)	0	0	0	2.23535e+06	275249	0	375724	335570	336804	697157	0	1.30088e+06	1.55588e+06	1.37739e+06	2.32754e+06	2.93649e+06	0	442331	1.27778e+06	2.47424e+06	1.27208e+06	275619	694850	0	0	598121	3.84281e+06	3.55033e+06	869888	1.39594e+06	1.71821e+06	1.26427e+06	812817	729276	4.68705e+06	1.23369e+06	0	1.44012e+07	931806	373644	564153
	P10645	CMGA_HUMAN	Chromogranin-A (CgA) (Pituitary secretory protein I) (SP-I) [Cleaved into: Vasostatin-1 (Vasostatin I); Vasostatin-2 (Vasostatin II); EA-92; ES-43; Pancreastatin; SS-18; WA-8; WE-14; LF-19; Catestatin (SL21); AL-11; GV-19; GR-44; ER-37; GE-25; Serpinin-RRG; Serpinin; p-Glu serpinin precursor]	314547	461203	153702	1.1772e+06	0	0	320086	0	0	500240	0	792532	1.75875e+06	790005	1.74053e+06	1.35413e+06	831772	694134	0	946854	904006	536237	1.4071e+06	729529	755255	1.15856e+06	1.01093e+06	1.40872e+06	1.5797e+06	1.39118e+06	1.24006e+06	5.73256e+06	9.7639e+06	930037	3.01123e+06	3.68337e+06	2.50755e+06	4.8955e+06	770887	923611	1.13351e+06
	P00441	SODC_HUMAN	Superoxide dismutase [Cu-Zn] (EC 1.15.1.1) (Superoxide dismutase 1) (hSod1)	0	0	147086	2.36682e+06	0	0	1.19432e+06	0	0	579927	0	1.23064e+06	3.13223e+06	3.18042e+06	7.28092e+06	5.67246e+06	0	774897	0	3.20234e+06	2.88936e+06	364033	707486	434273	0	1.10461e+06	919153	1.50288e+06	1285366	1.59024e+06	629659	1.4928e+06	3023500	1.59678e+06	2.03153e+06	1.41839e+06	1.12543e+06	4.44599e+06	993767	437636	887462
	P18065	IBP2_HUMAN	Insulin-like growth factor-binding protein 2 (IBP-2) (IGF-binding protein 2) (IGFBP-2)	0	0	0	1.74428e+06	0	0	0	0	0	0	0	636868	1.39367e+06	1.15035e+06	4.95088e+06	3.77693e+06	0	314416	0	1.86081e+06	1.39649e+06	0	2.4541e+06	577037	510740	1.0914e+06	1.97216e+06	3.34171e+06	4.46903e+06	1.52137e+06	867164	2.33611e+06	4.90191e+06	960592	3.01455e+06	1.29217e+06	1.11542e+06	6.74759e+06	580530	1.25948e+06	1.60506e+06
	P25815	S100P_HUMAN	Protein S100-P (Migration-inducing gene 9 protein) (MIG9) (Protein S100-E) (S100 calcium-binding protein P)	0	0	0	502259	0	0	0	0	0	0	0	0	398665	374987	2.21261e+06	1.92713e+06	0	0	0	1.53792e+06	699181	0	618491	0	0	0	8756678	9.83028e+06	4377998	0	491881	5.17001e+06	0	0	7.63986e+06	1.23445e+06	0	1.10227e+07	402908	395144	342267
	P05408	7B2_HUMAN	Neuroendocrine protein 7B2 (Pituitary polypeptide) (Secretogranin V) (Secretogranin-5) (Secretory granule endocrine protein I) [Cleaved into: N-terminal peptide; C-terminal peptide]	0	0	0	1.65243e+06	0	0	0	0	0	0	0	0	0	0	0	425513	0	0	0	1.11579e+06	909932	0	1.81805e+06	2721644	1.53848e+06	1.5576e+06	1.54565e+06	2.59751e+06	3.75132e+06	1.64561e+06	2.29684e+06	3.05649e+06	1.17901e+07	1.83769e+06	3.10119e+06	2.13396e+06	4.0163e+06	5.93996e+06	913156	1.37919e+06	1468469
	P62158	CALM_HUMAN	Calmodulin (CaM)	0	0	0	3.00728e+06	0	0	730529	0	0	560015	0	1.30738e+06	2.4291e+06	2.98477e+06	2.26635e+06	5.79136e+06	0	542662	0	4.01416e+06	2.52866e+06	338993	0	170919	0	0	2.88055e+06	2.83341e+06	1.91535e+06	0	1.52673e+06	3.71466e+06	1.20254e+06	0	4.78285e+06	2.71119e+06	0	6.37015e+06	1.21653e+06	1.15286e+06	2.68983e+06
	P30086	PEBP1_HUMAN	Phosphatidylethanolamine-binding protein 1 (PEBP-1) (HCNPpp) (Neuropolypeptide h3) (Prostatic-binding protein) (Raf kinase inhibitor protein) (RKIP) [Cleaved into: Hippocampal cholinergic neurostimulating peptide (HCNP)]	0	0	0	2.56114e+06	0	0	694567	0	0	433805	0	622460	1.92256e+06	1.33969e+06	6.23717e+06	4.00301e+06	441000	628346	509871	1.73063e+06	1517142	627630	1.96919e+06	543094	399558	1.40416e+06	1.56888e+06	2.4895e+06	2.33047e+06	2.18299e+06	3.28776e+06	1.39964e+06	2.34011e+06	1.12061e+06	5.63474e+06	1.58589e+06	521605	4.83832e+06	1.65787e+06	630880	1.06505e+06
	P62805	H4_HUMAN	Histone H4	0	0	0	988890	0	0	0	0	0	0	0	0	0	0	1163276	1.5951e+06	0	0	0	1.36524e+06	1.60052e+06	0	1.56199e+06	0	0	2.10239e+06	1.92852e+06	3.50792e+06	4.9299e+06	6.77797e+06	2.42809e+06	9.89364e+06	1.04632e+06	1.16491e+06	6.1591e+06	2.52297e+06	0	4.57119e+06	3.47746e+06	1.4609e+06	1.7446e+06
	P51693	APLP1_HUMAN	Amyloid-like protein 1 (APLP) (APLP-1) [Cleaved into: C30]	511705	663435	222193	1.45853e+06	0	0	458430	0	0	254581	0	495023	1.27839e+06	587552	2.12337e+06	1.60149e+06	790389	723201	0	1.59963e+06	1.34153e+06	2.4588e+06	1.81284e+06	830610	989068	1.51048e+06	1.03145e+06	1.60745e+06	2.5916e+06	2.02641e+06	1.84221e+06	3.14695e+06	1.02828e+07	1.39148e+06	3.23925e+06	1.54567e+06	2.33815e+06	6.16241e+06	957498	859121	1.26606e+06
	P04216	THY1_HUMAN	Thy-1 membrane glycoprotein (CDw90) (Thy-1 antigen) (CD antigen CD90)	0	300245	0	0	0	0	0	0	0	0	0	208824	646636	0	0	0	448452	327933	0	1.06026e+06	791491	494201	1.66358e+06	849934	606064	0	1.2082e+06	2.12369e+06	1.82228e+06	0	1.76306e+06	6.74569e+06	1.16133e+07	875336	6.87676e+06	4.05712e+06	4.90487e+06	8435456	660357	1.27052e+06	2.61841e+06
	Q15782	CH3L2_HUMAN	Chitinase-3-like protein 2 (Chondrocyte protein 39) (YKL-39)	0	0	0	1.46902e+06	700985	0	0	0	0	557103	0	367352	1.02586e+06	830791	3.61015e+06	2.2926e+06	0	698020	821771	800613	755449	572529	4.60313e+06	2.01234e+06	236872	2.12094e+06	6.05708e+06	4.17934e+06	1.42734e+06	2.75476e+06	2.53963e+06	1.27233e+06	0	3.03439e+06	5.25256e+06	1.88273e+06	206995	6.22348e+06	1.9537e+06	1.06715e+06	1.23296e+06
	Q9H299	SH3L3_HUMAN	SH3 domain-binding glutamic acid-rich-like protein 3 (SH3 domain-binding protein 1) (SH3BP-1)	0	0	0	2.62085e+06	0	0	238884	0	0	0	0	603142	2.21663e+06	2.10675e+06	6.95598e+06	6.62745e+06	0	0	0	3.82824e+06	1.91337e+06	0	0	0	0	793009	3.65263e+06	3.82106e+06	1.45275e+06	927702	0	2.26519e+06	927607	0	5.57794e+06	854504	0	15119739	0	373474	551465
	P14780	MMP9_HUMAN	Matrix metalloproteinase-9 (MMP-9) (EC 3.4.24.35) (92 kDa gelatinase) (92 kDa type IV collagenase) (Gelatinase B) (GELB) [Cleaved into: 67 kDa matrix metalloproteinase-9; 82 kDa matrix metalloproteinase-9]	0	0	0	725934	0	0	0	0	0	0	0	0	0	0	0	0	0	0	0	447163	360009	97405.5	2.81645e+06	186830	0	7.38882e+06	4.54906e+06	2.54545e+06	358349	1.42498e+07	1.20715e+07	546131	546992	2.34975e+06	1.79623e+06	255586	0	4.41112e+06	7.53514e+06	281948	197472
	P04075	ALDOA_HUMAN	Fructose-bisphosphate aldolase A (EC 4.1.2.13) (Lung cancer antigen NY-LU-1) (Muscle-type aldolase)	0	0	0	2.37895e+06	0	0	613908	0	0	381505	0	709618	2.05374e+06	1.81662e+06	5.22977e+06	4.22607e+06	0	374964	560372	2.63485e+06	2.02806e+06	233871	1.32856e+06	142134	0	1.55384e+06	2.95058e+06	3.61729e+06	2.03414e+06	1.12482e+06	2.01095e+06	2.54923e+06	1.1997e+06	935580	4.83155e+06	1.59076e+06	219319	1.21309e+07	981077	539586	850835
	Q15582	BGH3_HUMAN	Transforming growth factor-beta-induced protein ig-h3 (Beta ig-h3) (Kerato-epithelin) (RGD-containing collagen-associated protein) (RGD-CAP)	0	495160	372005	2.83982e+06	185840	0	617237	0	0	815266	409750	1.5517e+06	3.21524e+06	3.04075e+06	6.14917e+06	8.24149e+06	574846	762207	999502	4.2515e+06	2.58333e+06	0	1.64696e+06	229487	0	1.2979e+06	1.80829e+06	3.32865e+06	2.57972e+06	1.38126e+06	1.07946e+06	1.08326e+06	1.67433e+06	760221	2.21286e+06	974846	565711	5.00627e+06	349212	418747	641284
	P05546	HEP2_HUMAN	Heparin cofactor 2 (Heparin cofactor II) (HC-II) (Protease inhibitor leuserpin-2) (HLS2) (Serpin D1)	1.77293e+06	197589	0	1.79976e+06	337880	0	0	0	0	0	0	0	404421	445718	742974	922602	332613	0	0	876997	674880	233017	4.34161e+06	319580	0	6.78191e+06	3.71492e+06	3.84185e+06	5.11303e+06	6.06542e+06	3.80175e+06	712565	4.07096e+06	2.24607e+06	2.82463e+06	905305	1.42503e+06	7.106e+06	1.43376e+06	329480	549089
	P00746	CFAD_HUMAN	Complement factor D (EC 3.4.21.46) (Adipsin) (C3 convertase activator) (Properdin factor D)	0	0	0	2.12148e+06	0	0	0	0	0	0	0	0	802865	854872	3.59966e+06	2.53394e+06	0	362554	0	2.23168e+06	1.65345e+06	0	3.51427e+06	343744	195203	1.12145e+06	1.50097e+06	2.48052e+06	4.79154e+06	2.13223e+06	1.84581e+06	2.95069e+06	4.95612e+06	1.86488e+06	4.68842e+06	2.02429e+06	918297	1.38761e+07	366580	454681	962423
	P00918	CAH2_HUMAN	Carbonic anhydrase 2 (EC 4.2.1.1) (Carbonate dehydratase II) (Carbonic anhydrase C) (CAC) (Carbonic anhydrase II) (CA-II)	0	0	0	3.93411e+06	0	0	3.46709e+06	0	0	561113	0	1.97402e+06	5.61927e+06	5.8912e+06	1.65267e+07	1.15271e+07	0	653519	911730	3.01382e+06	1.8233e+06	342815	919123	123053	0	0	0	0	0	2.1848e+06	2.82866e+06	0	0	0	2.90828e+06	0	0	0	579392	0	0
	P09871	C1S_HUMAN	Complement C1s subcomponent (EC 3.4.21.42) (C1 esterase) (Complement component 1 subcomponent s) [Cleaved into: Complement C1s subcomponent heavy chain; Complement C1s subcomponent light chain]	970943	298294	0	2.04484e+06	208021	0	457548	0	0	320307	0	623578	1.19912e+06	971413	3.24971e+06	2.93406e+06	575472	370742	0	1.35762e+06	1.16989e+06	214039	3.60655e+06	558216	0	2.74136e+06	2.2919e+06	3.37902e+06	4.13601e+06	2.16937e+06	2.41337e+06	1.97067e+06	5.85194e+06	1.37676e+06	2.81596e+06	1.86097e+06	2.05008e+06	1.03082e+07	699456	469988	641113
	O43505	B4GA1_HUMAN	Beta-1,4-glucuronyltransferase 1 (EC 2.4.1.-) (I-beta-1,3-N-acetylglucosaminyltransferase) (iGnT) (N-acetyllactosaminide beta-1,3-N-acetylglucosaminyltransferase) (Poly-N-acetyllactosamine extension enzyme) (UDP-GlcNAc:betaGal beta-1,3-N-acetylglucosaminyltransferase 1)	513403	530123	0	2.1375e+06	0	0	424016	0	0	455816	0	766593	2.0849e+06	1.68019e+06	2.52873e+06	2.70125e+06	1.09537e+06	452303	0	1.21564e+06	1.52065e+06	321704	2.19637e+06	786332	863585	1.18255e+06	1.43768e+06	2.62859e+06	2.37215e+06	1.90867e+06	1.78175e+06	3.78997e+06	9.774e+06	1.15327e+06	3.28333e+06	1.74792e+06	2.44523e+06	7.9275e+06	890880	846091	1.35697e+06
	P07339	CATD_HUMAN	Cathepsin D (EC 3.4.23.5) [Cleaved into: Cathepsin D light chain; Cathepsin D heavy chain]	462641	0	0	2.46797e+06	172100	0	4.53794e+06	0	0	547676	0	434675	1.23131e+06	2.93992e+06	8.32886e+06	3.58354e+06	412682	402183	0	1.50884e+06	1.08998e+06	795966	1.80041e+06	1.56187e+06	1.24657e+06	1.59445e+06	1.57099e+06	2.51667e+06	2.51399e+06	2.48084e+06	2.37688e+06	2.58147e+06	1.44174e+06	1.4857e+06	2.71697e+06	1.27969e+06	1.23667e+06	5.0061e+06	1.24671e+06	1.3366e+06	2.04865e+06
	O00533	NCHL1_HUMAN	Neural cell adhesion molecule L1-like protein (Close homolog of L1) [Cleaved into: Processed neural cell adhesion molecule L1-like protein]	0	355436	0	3.50217e+06	0	0	0	0	0	0	0	2.15023e+06	2.68059e+06	0	1.11143e+06	2.01623e+07	389563	1.43567e+06	0	4.08177e+06	659474	0	1.06366e+06	236876	0	4.74566e+06	1.39714e+06	620843	662406	3.53783e+06	398298	1.23874e+06	3.82982e+06	2.23765e+06	1.58477e+06	1.03075e+06	980080	4.38141e+06	2.11501e+06	181361	334557
	P00736	C1R_HUMAN	Complement C1r subcomponent (EC 3.4.21.41) (Complement component 1 subcomponent r) [Cleaved into: Complement C1r subcomponent heavy chain; Complement C1r subcomponent light chain]	801595	381347	330249	1.80834e+06	367417	0	0	0	0	527324	0	634716	701020	801175	4.43819e+06	2.74415e+06	627986	489974	0	1.32737e+06	1.12938e+06	152847	3.78951e+06	397280	0	2.31168e+06	2.4381e+06	4.34622e+06	4.26554e+06	2.34593e+06	2.24811e+06	1.98675e+06	5.33951e+06	1.37896e+06	2.94182e+06	1.94162e+06	1.19263e+06	1.21842e+07	751301	495414	572379
	Q03591	FHR1_HUMAN	Complement factor H-related protein 1 (FHR-1) (H factor-like protein 1) (H-factor-like 1) (H36)	0	0	0	421263	0	0	0	0	0	0	0	0	0	0	0	0	0	0	0	0	0	0	6.28646e+06	604977	280678	6.90315e+06	3.75039e+06	5.61115e+06	6.63669e+06	9.58787e+06	6.96145e+06	1.54381e+06	3.21909e+06	3.60309e+06	4.60457e+06	979557	0	6.29509e+06	1.36337e+06	370600	505238
	Q96KN2	CNDP1_HUMAN	Beta-Ala-His dipeptidase (EC 3.4.13.20) (CNDP dipeptidase 1) (Carnosine dipeptidase 1) (Glutamate carboxypeptidase-like protein 2) (Serum carnosinase)	740645	497110	184190	2.1444e+06	295417	0	308068	0	0	328261	0	414440	1.25478e+06	716068	2.9056e+06	2.15859e+06	857178	579640	493212	2.059e+06	1.8373e+06	530312	2.39451e+06	833129	490520	2.99118e+06	2.11482e+06	2.94528e+06	3.10591e+06	2.77965e+06	2.66185e+06	2.91401e+06	8.72078e+06	1.63106e+06	2.9403e+06	1.20226e+06	2.52344e+06	8.73068e+06	862854	1.09165e+06	1.42791e+06
	P80511	S10AC_HUMAN	Protein S100-A12 (CGRP) (Calcium-binding protein in amniotic fluid 1) (CAAF1) (Calgranulin-C) (CAGC) (Extracellular newly identified RAGE-binding protein) (EN-RAGE) (Migration inhibitory factor-related protein 6) (MRP-6) (p6) (Neutrophil S100 protein) (S100 calcium-binding protein A12) [Cleaved into: Calcitermin]	0	0	0	0	573348	0	0	0	0	350950	0	0	0	0	0	0	0	581226	836450	1.61708e+06	1.24629e+06	952404	2.02766e+06	0	0	825653	1.44704e+07	6.10892e+06	1.74569e+06	1.7547e+06	651207	5.3949e+06	0	406785	1.23793e+07	1.89168e+06	0	1.61185e+07	434586	541018	603419
	P27169	PON1_HUMAN	Serum paraoxonase/arylesterase 1 (PON 1) (EC 3.1.1.2) (EC 3.1.1.81) (EC 3.1.8.1) (Aromatic esterase 1) (A-esterase 1) (K-45) (Serum aryldialkylphosphatase 1)	2.99986e+06	0	0	1.8688e+06	793452	0	0	0	0	0	0	0	675832	0	834519	724812	787732	0	0	706925	508311	0	7.5636e+06	298311	0	8.9202e+06	4.23684e+06	5.18124e+06	4.19293e+06	8841087	6.90654e+06	645655	2.18841e+06	2975367	3.52887e+06	858024	217230	3.94141e+06	1.96697e+06	191995	0
	P05156	CFAI_HUMAN	Complement factor I (EC 3.4.21.45) (C3B/C4B inactivator) [Cleaved into: Complement factor I heavy chain; Complement factor I light chain]	1.30641e+06	223271	0	1.4925e+06	265705	0	0	0	0	214874	0	388588	695656	577619	1.57485e+06	1.66247e+06	365898	237495	0	1.12553e+06	969888	264139	5.09455e+06	439851	231203	4.70553e+06	2.73567e+06	3.76197e+06	4.72128e+06	6.58427e+06	5.81943e+06	1.80265e+06	3.34457e+06	3.20874e+06	4.43613e+06	1.36481e+06	978819	9.27159e+06	1.36293e+06	655714	687639
	P10643	CO7_HUMAN	Complement component C7	872021	801598	295567	2.16896e+06	417431	0	0	0	0	727509	0	787865	1.37929e+06	1.21566e+06	3.17628e+06	3.46407e+06	1.44138e+06	825959	452031	2.5991e+06	2.1539e+06	372001	3.13716e+06	422485	166801	3.49428e+06	2.28213e+06	3.85914e+06	5.23701e+06	2.26225e+06	2.16306e+06	1.959e+06	4.67111e+06	1.70309e+06	2.94036e+06	2.06266e+06	1.73029e+06	1.16007e+07	943361	383578	625800
	P02792	FRIL_HUMAN	Ferritin light chain (Ferritin L subunit)	0	0	0	1.1155e+07	0	0	0	0	0	1.68933e+06	0	2.72038e+06	7.50193e+06	6.26358e+06	1.39457e+07	1.36609e+07	0	2.29859e+06	3.43943e+06	8.40987e+06	4.24215e+06	0	0	0	0	1.3023e+06	0	0	0	0	0	0	0	0	0	0	0	0	210584	0	0
	P02461	CO3A1_HUMAN	Collagen alpha-1(III) chain	0	0	0	0	0	0	0	0	0	0	0	0	0	0	1.92549e+06	2.25967e+06	0	0	0	704473	786317	0	0	0	0	0	1.16378e+07	2.21318e+06	2.83144e+06	0	0	293605	1.86427e+06	0	0	541609	0	5.19678e+07	0	0	0
	P04156	PRIO_HUMAN	Major prion protein (PrP) (ASCR) (PrP27-30) (PrP33-35C) (CD antigen CD230)	0	244080	0	2.33636e+06	0	0	0	0	0	407036	0	0	1.94389e+06	0	4.7521e+06	5.19179e+06	480404	467274	0	1.58257e+06	2.0025e+06	0	3.87702e+06	828344	472232	1.07276e+06	1.58751e+06	2.82014e+06	3.31283e+06	1.80778e+06	4.39456e+06	3.9081e+06	1.01525e+07	1.00918e+06	6.22674e+06	2.83979e+06	1.70199e+06	1.00261e+07	607890	973560	1.31442e+06
	Q9Y6R7	FCGBP_HUMAN	IgGFc-binding protein (Fcgamma-binding protein antigen) (FcgammaBP)	629324	1.1069e+06	577896	2.71754e+06	354144	0	827366	0	0	727079	0	1.06594e+06	2.02174e+06	1.63864e+06	4.91301e+06	4.77489e+06	1.6194e+06	1.08954e+06	992108	2.46722e+06	1.97649e+06	386731	1.05786e+06	970362	450620	1.8675e+06	1.49065e+06	4.53601e+06	7.35249e+06	877402	533094	2.03693e+06	1.58251e+06	734329	2.71671e+06	2.26948e+06	2.62402e+06	1.27695e+07	387553	1.51147e+06	2.84094e+06
	P04406	G3P_HUMAN	Glyceraldehyde-3-phosphate dehydrogenase (GAPDH) (EC 1.2.1.12) (Peptidyl-cysteine S-nitrosylase GAPDH) (EC 2.6.99.-)	0	0	0	2.06177e+06	270438	0	712919	0	0	292358	0	1.00458e+06	1.97724e+06	1.68878e+06	6.3894e+06	4.01321e+06	0	121866	381625	2.2918e+06	1.3381e+06	237346	1.17365e+06	0	0	2.26713e+06	7.00256e+06	6.9781e+06	1.80723e+06	5.036e+06	1.74578e+06	2.43388e+06	1.39774e+06	1117636	4.40666e+06	1.89601e+06	0	1.62352e+07	891398	576394	916624
	P41271	NBL1_HUMAN	Neuroblastoma suppressor of tumorigenicity 1 (DAN domain family member 1) (Protein N03) (Zinc finger protein DAN)	0	0	0	2.2709e+06	0	0	0	0	0	0	0	0	2.21921e+06	0	0	4.39769e+06	0	0	0	2.48088e+06	1.52527e+06	0	2.48382e+06	663657	0	1.77169e+06	1.35406e+06	2.22314e+06	5.58925e+06	0	1.06188e+06	5440856	1.11534e+07	1.43773e+06	5.50372e+06	2929263	6.0642e+06	1.60128e+07	635075	674278	821923
	P04003	C4BPA_HUMAN	C4b-binding protein alpha chain (C4bp) (Proline-rich protein) (PRP)	1.97778e+06	0	0	1.32119e+06	476716	0	0	0	0	0	0	0	0	120321	0	0	283538	0	0	0	203330	0	8.224e+06	293656	0	8.14477e+06	3.4713e+06	3.12559e+06	2.20713e+06	1.46656e+07	9.76396e+06	1.45786e+06	1.10751e+06	4.72139e+06	6.44534e+06	1.46142e+06	0	6.64865e+06	2.43281e+06	208051	0
	P04040	CATA_HUMAN	Catalase (EC 1.11.1.6)	0	0	645819	5.09815e+06	0	0	2.46196e+06	1.05165e+06	713719	893276	851796	1.95117e+06	5.8969e+06	5.55332e+06	1.8278e+07	1.56046e+07	0	469635	1.1613e+06	3.30695e+06	2.15732e+06	0	196077	0	0	135615	1.05689e+06	1.31643e+06	1.21683e+06	0	0	1.5364e+06	283332	0	2.26641e+06	797925	0	3.60043e+06	0	190022	207917
	P01344	IGF2_HUMAN	Insulin-like growth factor II (IGF-II) (Somatomedin-A) (T3M-11-derived growth factor) [Cleaved into: Insulin-like growth factor II; Insulin-like growth factor II Ala-25 Del; Preptin]	0	0	0	769366	0	0	0	0	0	0	0	0	0	0	0	2.03685e+06	0	0	0	998787	0	0	6.29518e+06	915018	0	3.68924e+06	4.32972e+06	4.93803e+06	6.21031e+06	2.34632e+06	0	3.68744e+06	8.20104e+06	1.19812e+06	3.34516e+06	1140739	3.27364e+06	2.40499e+07	565294	651359	1.21731e+06
	P19827	ITIH1_HUMAN	Inter-alpha-trypsin inhibitor heavy chain H1 (ITI heavy chain H1) (ITI-HC1) (Inter-alpha-inhibitor heavy chain 1) (Inter-alpha-trypsin inhibitor complex component III) (Serum-derived hyaluronan-associated protein) (SHAP)	2.84473e+06	321541	0	2.07783e+06	552210	0	0	0	0	213878	0	284268	554779	402114	1.36043e+06	1.30458e+06	683410	158921	0	1021983	801466	262097	9.21248e+06	310058	0	8.16941e+06	4.62687e+06	5.02373e+06	6.15994e+06	7.0546e+06	6.62243e+06	987898	2.59079e+06	3.38948e+06	4.53065e+06	1.36799e+06	463566	6.2551e+06	1.62373e+06	237446	406492
	P06702	S10A9_HUMAN	Protein S100-A9 (Calgranulin-B) (Calprotectin L1H subunit) (Leukocyte L1 complex heavy chain) (Migration inhibitory factor-related protein 14) (MRP-14) (p14) (S100 calcium-binding protein A9)	0	0	0	4.40641e+06	525789	0	294635	563673	390777	715850	0	1.1524e+06	3.98908e+06	4.22089e+06	1.21126e+07	1.01762e+07	503364	1.06768e+06	1.34958e+06	5.66021e+06	3.9143e+06	1.06752e+06	388767	0	0	2.32646e+06	1.82168e+06	1880252	1.31737e+06	8.31786e+06	0	1.2081e+06	0	1.3114e+06	1.99064e+06	356593	0	5.52473e+06	3.30389e+06	435175	209342
	Q13822	ENPP2_HUMAN	Ectonucleotide pyrophosphatase/phosphodiesterase family member 2 (E-NPP 2) (EC 3.1.4.39) (Autotaxin) (Extracellular lysophospholipase D) (LysoPLD)	1.17127e+06	448422	379507	2.12844e+06	616947	0	543238	377761	513469	532025	668761	645276	1.25308e+06	1.12418e+06	2.85885e+06	3.1183e+06	1.23376e+06	1.12705e+06	562312	2.10244e+06	1.89892e+06	2.1856e+06	3.15942e+06	3.03984e+06	2.93595e+06	2.29591e+06	2.14268e+06	3.66162e+06	4.97437e+06	1.68946e+06	2.91696e+06	4.91813e+06	3.72831e+06	1.60096e+06	2.87026e+06	1.79443e+06	2.08711e+06	7.69406e+06	1.02752e+06	1.76112e+06	3.12056e+06
	Q8IVL6	P3H3_HUMAN	Prolyl 3-hydroxylase 3 (EC 1.14.11.7) (Leprecan-like protein 2) (Protein B)	0	0	0	2.47874e+06	0	0	0	0	0	0	0	0	0	0	0	0	0	0	0	4.75846e+06	0	0	0	0	0	0	0	0	8.34352e+06	0	0	1.30717e+07	7.40059e+06	0	6.93873e+06	9864315	3.39378e+06	1.68862e+07	3.00401e+06	0	6.95013e+06
	P61916	NPC2_HUMAN	Epididymal secretory protein E1 (Human epididymis-specific protein 1) (He1) (Niemann-Pick disease type C2 protein)	0	0	0	1.18791e+06	0	0	0	0	0	0	0	0	853909	695913	2644186	2.14746e+06	1.20768e+06	1.39932e+06	0	1.25639e+06	1.19248e+06	835914	2.74441e+06	2.09557e+06	1.34977e+06	2.75741e+06	3.10741e+06	4.46602e+06	7.26196e+06	1.78587e+06	3.45404e+06	5.254e+06	5.90817e+06	2.17043e+06	5.31003e+06	2.25207e+06	3.0266e+06	1.29073e+07	1.34149e+06	2.23208e+06	4.25637e+06
	P08185	CBG_HUMAN	Corticosteroid-binding globulin (CBG) (Serpin A6) (Transcortin)	2.15576e+06	0	0	3.80936e+06	281637	0	0	0	0	158945	0	471107	924913	781555	2.59598e+06	1.88899e+06	486584	0	1.20057e+06	1.83399e+06	1.49043e+06	398723	5.47534e+06	291461	0	6032197	2.87265e+06	3.40832e+06	4.72295e+06	8.08253e+06	6.00831e+06	1.61422e+06	3.4532e+06	4.17563e+06	4.70183e+06	1.29902e+06	1.51831e+06	1.22533e+07	2.42193e+06	581828	743269
	Q12805	FBLN3_HUMAN	EGF-containing fibulin-like extracellular matrix protein 1 (Extracellular protein S1-5) (Fibrillin-like protein) (Fibulin-3) (FIBL-3)	995340	686694	353292	2.0034e+06	429145	0	572889	0	0	476636	0	857478	1.35118e+06	1.09141e+06	3.12563e+06	3.38706e+06	1.02269e+06	932023	0	2.69658e+06	2.0096e+06	360974	4.95354e+06	1.31633e+06	470800	2.27003e+06	3.44314e+06	5.49972e+06	6.5055e+06	2.76751e+06	2.75867e+06	3.05015e+06	8.29769e+06	1.50053e+06	3.16934e+06	2.04604e+06	2.35979e+06	1.28249e+07	890428	1.00515e+06	1.56772e+06
	P08697	A2AP_HUMAN	Alpha-2-antiplasmin (Alpha-2-AP) (Alpha-2-plasmin inhibitor) (Alpha-2-PI) (Serpin F2)	1.8105e+06	230284	224739	3.53152e+06	504466	0	574580	0	0	653566	0	723926	1.37314e+06	1.40955e+06	2.17868e+06	3.15358e+06	426708	460018	426282	1.93414e+06	1.6078e+06	299069	3.11921e+06	695979	0	8.71423e+06	3.12669e+06	3.04258e+06	5.68876e+06	8.28482e+06	2.3447e+06	2.49255e+06	3.01272e+06	4.6134e+06	3.17758e+06	716917	2.71025e+06	1.19927e+07	3.12792e+06	629184	540863
	P43652	AFAM_HUMAN	Afamin (Alpha-albumin) (Alpha-Alb)	1.67507e+06	330980	0	1.36053e+06	366569	0	0	0	0	326262	0	237840	1.05058e+06	532741	1.94849e+06	1.59454e+06	511874	241525	0	1.15311e+06	750468	280925	8.0857e+06	468622	157423	8.49641e+06	5.14867e+06	6.84278e+06	6.8161e+06	5.61885e+06	5.62955e+06	1.55202e+06	6.99824e+06	3.80775e+06	4.41983e+06	1.33235e+06	1.91852e+06	7.51323e+06	1.91481e+06	628885	405747
	Q6UX71	PXDC2_HUMAN	Plexin domain-containing protein 2 (Tumor endothelial marker 7-related protein)	0	0	0	617576	0	0	0	0	0	0	0	0	294933	0	0	0	0	0	0	408770	390469	0	7.82802e+07	173318	100958	581210	406940	717517	774072	363683	0	579494	1.28636e+06	0	1.11991e+06	331171	576255	2.76049e+06	0	310040	475188
	P07602	SAP_HUMAN	Prosaposin (Proactivator polypeptide) [Cleaved into: Saposin-A (Protein A); Saposin-B-Val; Saposin-B (Cerebroside sulfate activator) (CSAct) (Dispersin) (Sphingolipid activator protein 1) (SAP-1) (Sulfatide/GM1 activator); Saposin-C (A1 activator) (Co-beta-glucosidase) (Glucosylceramidase activator) (Sphingolipid activator protein 2) (SAP-2); Saposin-D (Component C) (Protein C)]	0	386540	192238	2.75366e+06	331920	0	0	0	0	585358	0	692860	2.02766e+06	1.34453e+06	4.94129e+06	4.24227e+06	709665	781734	0	1.83725e+06	1.5186e+06	973994	3.67332e+06	1.11916e+06	807053	3.22584e+06	1.89727e+06	3.16257e+06	3.77476e+06	5.27728e+06	4.84772e+06	4.85116e+06	1.04253e+07	2.57747e+06	4.80625e+06	1.51399e+06	1.96122e+06	9.45574e+06	1.65516e+06	1.18557e+06	2.46489e+06
	P16070	CD44_HUMAN	CD44 antigen (CDw44) (Epican) (Extracellular matrix receptor III) (ECMR-III) (GP90 lymphocyte homing/adhesion receptor) (HUTCH-I) (Heparan sulfate proteoglycan) (Hermes antigen) (Hyaluronate receptor) (Phagocytic glycoprotein 1) (PGP-1) (Phagocytic glycoprotein I) (PGP-I) (CD antigen CD44)	300844	217969	0	1.44752e+06	0	0	0	0	0	219868	0	558353	967145	1.31924e+06	3.12348e+06	3.19685e+06	410436	429860	0	1.8704e+06	2.10061e+06	513443	2.10376e+06	860531	793158	2.48021e+06	3.47563e+06	5.46395e+06	4.3048e+06	3291056	3.21676e+06	4.67877e+06	7.63895e+06	2.18883e+06	6.70997e+06	2.51379e+06	2.38429e+06	1.73091e+07	2.48635e+06	1.75137e+06	2.26877e+06
	P22352	GPX3_HUMAN	Glutathione peroxidase 3 (GPx-3) (GSHPx-3) (EC 1.11.1.9) (Extracellular glutathione peroxidase) (Plasma glutathione peroxidase) (GPx-P) (GSHPx-P)	958735	348296	0	2.54846e+06	0	0	0	0	0	631922	0	0	749331	631782	2.7239e+06	1.94138e+06	1.04466e+06	1.38931e+06	0	2.83531e+06	2.81847e+06	934926	7.48596e+06	1.08474e+06	784637	5.49288e+06	3.73673e+06	6.11574e+06	5.48619e+06	3.87859e+06	3.95714e+06	3.16942e+06	4.20292e+06	3.46929e+06	5.30229e+06	2.28421e+06	1.39946e+06	1.35709e+07	1.43353e+06	989625	1.57425e+06
	P19823	ITIH2_HUMAN	Inter-alpha-trypsin inhibitor heavy chain H2 (ITI heavy chain H2) (ITI-HC2) (Inter-alpha-inhibitor heavy chain 2) (Inter-alpha-trypsin inhibitor complex component II) (Serum-derived hyaluronan-associated protein) (SHAP)	3.87051e+06	466589	143630	2.41403e+06	1.00807e+06	0	0	0	0	432232	0	301375	705614	554630	1.58051e+06	1.24987e+06	897633	274580	0	987329	962039	370920	1.07886e+07	333292	0	1.35364e+07	6.07111e+06	5.42191e+06	7.2894e+06	1.03131e+07	6.46008e+06	890086	3.13469e+06	4.23272e+06	4.59826e+06	947478	450866	4.53986e+06	2.03557e+06	244872	312774
	P07998	RNAS1_HUMAN	Ribonuclease pancreatic (EC 3.1.27.5) (HP-RNase) (RIB-1) (RNase UpI-1) (Ribonuclease 1) (RNase 1) (Ribonuclease A) (RNase A)	0	0	0	2.29111e+06	0	0	0	0	0	0	0	0	2.17588e+06	1.38478e+06	4.03661e+06	3.69232e+06	0	0	0	1.9275e+06	1.71898e+06	780126	2.4507e+06	2.27417e+06	2.14503e+06	1.8362e+06	2.2738e+06	5.46879e+06	8.4575e+06	1.36248e+06	2.13256e+06	6.3352e+06	1.01148e+07	1.48078e+06	8.84948e+06	6.56538e+06	2.8563e+06	8.95401e+06	661884	2.15436e+06	3.46897e+06
	P23142	FBLN1_HUMAN	Fibulin-1 (FIBL-1)	538730	406688	379586	1.81241e+06	271924	0	608951	0	0	537336	0	567123	1.06258e+06	1.08459e+06	3.70454e+06	3.97159e+06	982261	715780	654388	1.97451e+06	1.49013e+06	765993	3.30376e+06	2.7979e+06	761541	3.31291e+06	3.41749e+06	6.46191e+06	6.8944e+06	2.46129e+06	3.44495e+06	4.70704e+06	1.11629e+07	2.02783e+06	3.5483e+06	2.83323e+06	2.99325e+06	1.27311e+07	1.46585e+06	1.3595e+06	1.80412e+06
	P02655	APOC2_HUMAN	Apolipoprotein C-II (Apo-CII) (ApoC-II) (Apolipoprotein C2) [Cleaved into: Proapolipoprotein C-II (ProapoC-II)]	4.58444e+06	0	0	2.20701e+06	635162	0	0	0	0	0	0	458710	1.26104e+06	1.18942e+06	0	4.69103e+06	0	0	0	1.00667e+06	949604	0	5.29562e+06	0	0	8.44805e+06	3.35246e+06	6.58113e+06	5.3443e+06	2.11582e+07	8.07007e+06	0	2903896	2.48166e+06	0	747617	1.4315e+06	1.50714e+07	2.51396e+06	310227	0
	P07737	PROF1_HUMAN	Profilin-1 (Epididymis tissue protein Li 184a) (Profilin I)	0	0	0	2.37593e+06	357661	0	0	0	0	634554	0	574859	1.4636e+06	1.40523e+06	4.12222e+06	4.30846e+06	0	597910	823082	2.71823e+06	1.98074e+06	0	2.48115e+06	453210	0	1.61741e+06	8.84814e+06	1.10196e+07	2.38879e+06	1.90206e+06	2.26643e+06	4.32839e+06	1.16954e+06	1.02026e+06	8.89555e+06	2.64512e+06	0	2.86355e+07	1.07925e+06	702617	1.04433e+06
	P02751	FINC_HUMAN	Fibronectin (FN) (Cold-insoluble globulin) (CIG) [Cleaved into: Anastellin; Ugl-Y1; Ugl-Y2; Ugl-Y3]	2.67791e+06	935780	526213	3.29693e+06	657970	0	636500	442546	419307	768058	538706	1.31273e+06	2.94789e+06	2.54018e+06	8.00952e+06	7.87212e+06	1.19165e+06	773072	1.01987e+06	4.21406e+06	3.78694e+06	162335	5.38372e+06	426051	238898	5.39512e+06	3.854e+06	6.1465e+06	5.01524e+06	5.47294e+06	2.96644e+06	1.94988e+06	4.83006e+06	3.3806e+06	4.43617e+06	1.99589e+06	1.13945e+06	5.01141e+06	1.31561e+06	749162	1.04168e+06
	P62328	TYB4_HUMAN	Thymosin beta-4 (T beta-4) (Fx) [Cleaved into: Hematopoietic system regulatory peptide (Seraspenide)]	0	0	0	5.7344e+06	0	0	472836	0	0	405201	0	1.0704e+06	2.74121e+06	2.37701e+06	7.47813e+06	7.29002e+06	0	359549	210993	4.01573e+06	2.73103e+06	695325	2.34932e+06	260115	0	2.25014e+06	7.00737e+06	6.24387e+06	2.0294e+06	3.34838e+06	2.05663e+06	2.93253e+06	2.9231e+06	1.12282e+06	1.04351e+07	2.09044e+06	1.22564e+06	2.07999e+07	1.65672e+06	838566	1.31907e+06
	Q14624	ITIH4_HUMAN	Inter-alpha-trypsin inhibitor heavy chain H4 (ITI heavy chain H4) (ITI-HC4) (Inter-alpha-inhibitor heavy chain 4) (Inter-alpha-trypsin inhibitor family heavy chain-related protein) (IHRP) (Plasma kallikrein sensitive glycoprotein 120) (Gp120) (PK-120) [Cleaved into: 70 kDa inter-alpha-trypsin inhibitor heavy chain H4; 35 kDa inter-alpha-trypsin inhibitor heavy chain H4]	2.50848e+06	288664	169191	3.7075e+06	681018	0	195557	0	174104	274908	0	397333	1.20408e+06	1.11599e+06	2.2822e+06	2.40051e+06	473977	262220	235673	1.46578e+06	1.29796e+06	748144	6.50778e+06	355509	107825	9.53711e+06	4.92171e+06	6.06555e+06	6.71838e+06	1.13202e+07	6.55963e+06	1.66516e+06	3.26126e+06	5.53341e+06	5.85651e+06	1.82935e+06	825670	1.11768e+07	3.10615e+06	586169	783182
	P24592	IBP6_HUMAN	Insulin-like growth factor-binding protein 6 (IBP-6) (IGF-binding protein 6) (IGFBP-6)	0	0	0	4.02974e+06	0	0	0	0	0	0	0	238854	1.05157e+06	1.25856e+06	4.3399e+06	5.40473e+06	0	0	0	4.00983e+06	3.84159e+06	0	5.34543e+06	698690	438988	3754725	3.19217e+06	6.22996e+06	8.09029e+06	1.84795e+06	1.73033e+06	4.81653e+06	7.19468e+06	2.01904e+06	3.96139e+06	3.60112e+06	5.55358e+06	2.47692e+07	618704	756355	1.17206e+06
	P02748	CO9_HUMAN	Complement component C9 [Cleaved into: Complement component C9a; Complement component C9b]	927991	185920	0	3.69953e+06	284534	0	279641	0	0	388998	0	793708	1.94426e+06	1.2853e+06	3.4062e+06	2.97154e+06	340334	449310	279732	2.14919e+06	1.81599e+06	434726	5.19929e+06	539146	322245	6.69994e+06	4.00271e+06	5.81172e+06	6.93135e+06	9.98061e+06	7.6168e+06	1.33433e+06	6.75054e+06	5.32251e+06	5.43464e+06	1.65686e+06	1.3255e+06	1.58188e+07	2.82634e+06	774462	1.03634e+06
	Q562R1	ACTBL_HUMAN	Beta-actin-like protein 2 (Kappa-actin)	0	202508	0	4.82032e+06	258715	0	0	0	0	738324	0	983812	2.16736e+06	1.98359e+06	4.40227e+06	5.85724e+06	0	445267	766191	4.4217e+06	2.53764e+06	751681	3.34837e+06	0	0	2.3669e+06	8.13501e+06	1.05965e+07	2.68408e+06	3.5041e+06	1.96405e+06	3.22337e+06	1.31946e+06	1.54309e+06	9.21378e+06	1.69609e+06	1.77478e+06	2.96645e+07	1.58355e+06	409503	559127
	P02745	C1QA_HUMAN	Complement C1q subcomponent subunit A	1.45618e+06	0	0	3.57557e+06	0	0	377225	0	0	0	0	602796	1.4939e+06	1.46302e+06	7.6878e+06	5.21869e+06	769133	0	0	2.36077e+06	2.03387e+06	0	2.91902e+06	1.12551e+06	0	2.35659e+06	3.6933e+06	8.26929e+06	1.1973e+07	5.2118e+06	0	3.80779e+06	8.98838e+06	2.55947e+06	4.70251e+06	4.77613e+06	3.19304e+06	1.84299e+07	1.38985e+06	2.25174e+06	2.5712e+06
	P02741	CRP_HUMAN	C-reactive protein [Cleaved into: C-reactive protein(1-205)]	0	0	0	3.27337e+06	0	0	0	0	0	299916	0	189782	581160	426165	1.48439e+06	763407	790330	407250	0	488978	270320	942960	2.87056e+06	0	0	853727	757574	1643807	2.17631e+06	3.42855e+07	2.35461e+06	570940	1.31749e+06	2.77345e+07	4.16875e+06	833066	4.91182e+06	1.23374e+07	8.46023e+06	316300	0
	P07858	CATB_HUMAN	Cathepsin B (EC 3.4.22.1) (APP secretase) (APPS) (Cathepsin B1) [Cleaved into: Cathepsin B light chain; Cathepsin B heavy chain]	0	509656	335092	2.99788e+06	0	0	616753	0	0	627331	0	1.63022e+06	3.4274e+06	2.87743e+06	8.24184e+06	7.58661e+06	764414	825858	882213	2.99633e+06	2.09958e+06	454230	3.18205e+06	639493	543228	1.3821e+06	3.48917e+06	1.11405e+07	5.44808e+06	2.40527e+06	2.11055e+06	3.9927e+06	2.63567e+06	1.4833e+06	6.74536e+06	3.03654e+06	906091	2.46303e+07	890128	2.15626e+06	2.81705e+06
	Q92876	KLK6_HUMAN	Kallikrein-6 (EC 3.4.21.-) (Neurosin) (Protease M) (SP59) (Serine protease 18) (Serine protease 9) (Zyme)	861271	440798	0	2.09643e+06	0	0	639292	0	274967	574050	0	809360	1.40667e+06	706392	3.96737e+06	3.72025e+06	2.14104e+06	2.00384e+06	432918	2.36765e+06	1.84927e+06	1.70813e+06	4.97608e+06	2.10583e+06	1.36133e+06	2.63077e+06	3.26767e+06	5.96902e+06	7.52689e+06	2.7322e+06	5.79044e+06	5.65406e+06	1.18877e+07	3.06825e+06	7.05945e+06	2.09163e+06	4.90457e+06	1.4415e+07	1.54545e+06	1.9071e+06	2.67009e+06
	P04196	HRG_HUMAN	Histidine-rich glycoprotein (Histidine-proline-rich glycoprotein) (HPRG)	2.06342e+06	600911	547083	2.26216e+06	1.39107e+06	0	574260	0	473041	871053	0	1.1878e+06	1.67362e+06	1.51066e+06	2.71938e+06	2.86982e+06	1.31884e+06	716797	777930	1.92438e+06	1.54517e+06	293297	1.13557e+07	520758	161475	7.05339e+06	4.34886e+06	4.95956e+06	5.54808e+06	1.13585e+07	8.32746e+06	2.4948e+06	6.13358e+06	6.05074e+06	6.64738e+06	2.6744e+06	1.90005e+06	1.11935e+07	1.8266e+06	334362	565289
	P08294	SODE_HUMAN	Extracellular superoxide dismutase [Cu-Zn] (EC-SOD) (EC 1.15.1.1)	1.45289e+06	331272	0	3.69901e+06	553897	0	648668	0	435353	0	0	0	1.72317e+06	0	1.73855e+06	4.43823e+06	865914	921220	0	3.06785e+06	2.13577e+06	3.21795e+06	3.2883e+06	6.15449e+06	4.17953e+06	3.87802e+06	2.83599e+06	3.64614e+06	5.07497e+06	4.00283e+06	2.67503e+06	8.58588e+06	4.28045e+06	4.28893e+06	6.96794e+06	3.74698e+06	3.21393e+06	1.22082e+07	2.28238e+06	5.42577e+06	8.13348e+06
	Q16270	IBP7_HUMAN	Insulin-like growth factor-binding protein 7 (IBP-7) (IGF-binding protein 7) (IGFBP-7) (IGFBP-rP1) (MAC25 protein) (PGI2-stimulating factor) (Prostacyclin-stimulating factor) (Tumor-derived adhesion factor) (TAF)	0	287656	0	1.43215e+06	1.15934e+06	0	0	0	0	0	0	0	1.60241e+06	877782	2.68692e+06	2.4281e+06	1.59431e+06	1.00801e+06	0	1.41525e+06	1.27569e+06	943236	3.36328e+06	8.65448e+06	6.75618e+06	2.47962e+06	3.9841e+06	6.87916e+06	8.02222e+06	3.74296e+06	3.84569e+06	1.28364e+07	2.87676e+06	2.62246e+06	8.31491e+06	3.23836e+06	1.52839e+06	5.77578e+06	2.24679e+06	6.85335e+06	1.00569e+07
	P00747	PLMN_HUMAN	Plasminogen (EC 3.4.21.7) [Cleaved into: Plasmin heavy chain A; Activation peptide; Angiostatin; Plasmin heavy chain A, short form; Plasmin light chain B]	2.17675e+06	279375	0	2.31782e+06	541356	0	0	0	0	0	0	300650	532148	385787	1.6643e+06	1.67725e+06	406036	279562	0	1.24611e+06	976438	292701	1.06994e+07	491601	275523	1.22445e+07	6.36049e+06	8.3945e+06	1.04816e+07	1.18049e+07	1.13071e+07	1.18673e+06	6.62442e+06	5.1794e+06	5.33166e+06	1.20866e+06	1.19822e+06	1.19616e+07	2.67478e+06	622818	774231
	P25311	ZA2G_HUMAN	Zinc-alpha-2-glycoprotein (Zn-alpha-2-GP) (Zn-alpha-2-glycoprotein)	2.93849e+06	1.95336e+06	1.54673e+06	6.76006e+06	1.19335e+06	0	1.4683e+06	1.28008e+06	1.18928e+06	2.13729e+06	1.92752e+06	1.66365e+06	2.96163e+06	3.3685e+06	8.94008e+06	9.83705e+06	1.43137e+06	1.98375e+06	3.48965e+06	4.93805e+06	4.11842e+06	719196	1.66051e+06	229001	272504	1.63267e+07	1.16449e+06	1.57082e+06	2.04998e+06	1.11786e+07	1.38953e+06	728595	1.47748e+06	5.99207e+06	1.1669e+06	648993	2.939e+06	4.06963e+06	3.99465e+06	403276	524913
	P02753	RET4_HUMAN	Retinol-binding protein 4 (Plasma retinol-binding protein) (PRBP) (RBP) [Cleaved into: Plasma retinol-binding protein(1-182); Plasma retinol-binding protein(1-181); Plasma retinol-binding protein(1-179); Plasma retinol-binding protein(1-176)]	2.053e+06	405707	299857	2.65724e+06	640853	0	364600	0	257532	239317	0	397127	1.0707e+06	1.17047e+06	3.01037e+06	3.98196e+06	960656	799766	643486	2.16729e+06	1.80859e+06	714173	6.7015e+06	1.78858e+06	1.16179e+06	1.94995e+07	8.08539e+06	9.19715e+06	1.36629e+07	5.23145e+06	3.00668e+06	2.51507e+06	7.76807e+06	2.46221e+06	2.53004e+06	2.11596e+06	1.93671e+06	8.93564e+06	1.58617e+06	1.24422e+06	1.58577e+06
	P06703	S10A6_HUMAN	Protein S100-A6 (Calcyclin) (Growth factor-inducible protein 2A9) (MLN 4) (Prolactin receptor-associated protein) (PRA) (S100 calcium-binding protein A6)	0	0	0	9.80522e+06	0	0	0	0	0	0	0	2.4822e+06	9.18802e+06	9.38844e+06	3.26953e+07	2.00043e+07	0	0	0	3.8581e+06	1.70485e+06	0	0	0	0	0	7.59462e+06	6.50092e+06	0	0	0	2.23675e+06	0	0	6.83374e+06	1.10114e+06	0	1.17701e+07	0	358643	283516
	P06727	APOA4_HUMAN	Apolipoprotein A-IV (Apo-AIV) (ApoA-IV) (Apolipoprotein A4)	3.84319e+06	0	0	2.18783e+06	455474	0	378099	0	0	222194	0	696390	2.19625e+06	1.47412e+06	6.1373e+06	6.31334e+06	554689	329206	176046	2.79518e+06	1.99997e+06	299881	1.31696e+07	576762	358151	1.30155e+07	5.41614e+06	7.01061e+06	1.12806e+07	8.64776e+06	5.85596e+06	1.305e+06	5.3363e+06	3.59872e+06	2.48987e+06	805686	1.87436e+06	1.35619e+07	1.17357e+06	408379	482302
	P16949	STMN1_HUMAN	Stathmin (Leukemia-associated phosphoprotein p18) (Metablastin) (Oncoprotein 18) (Op18) (Phosphoprotein p19) (pp19) (Prosolin) (Protein Pr22) (pp17)	0	0	0	0	0	0	0	0	0	0	0	0	0	0	0	0	0	0	0	0	0	0	0	0	0	0	2.37286e+07	0	0	0	0	0	0	0	0	0	0	1.02858e+08	0	0	0
	P01591	IGJ_HUMAN	Immunoglobulin J chain (Joining chain of multimeric IgA and IgM)	1.90979e+06	0	0	3.70688e+06	420872	0	0	0	0	0	0	277959	1.37551e+06	1.19034e+06	6.48907e+06	6.54776e+06	0	0	0	3.33243e+06	2.83813e+06	0	3.6279e+06	0	0	5.30883e+06	3.06609e+06	3.67366e+06	3.08415e+06	1.39128e+07	1.18384e+07	3.07363e+06	8.13719e+06	7.26569e+06	9.94417e+06	1.86982e+06	0	1.73404e+07	2.78524e+06	1.00874e+06	2.6323e+06
	P01008	ANT3_HUMAN	Antithrombin-III (ATIII) (Serpin C1)	2.91022e+06	558107	336094	5.06912e+06	624390	0	529680	0	343187	710285	0	668608	1.77372e+06	1.6258e+06	4.75067e+06	5.02616e+06	892297	842327	685251	2.89884e+06	2.41877e+06	887308	6.87518e+06	368032	0	1.80919e+07	5.60469e+06	7.311e+06	8.67636e+06	9.83069e+06	3.57295e+06	826928	6.66856e+06	6.30359e+06	3.80304e+06	769929	2.92042e+06	7.00282e+06	3.15048e+06	750833	672404
	P69891	HBG1_HUMAN	Hemoglobin subunit gamma-1 (Gamma-1-globin) (Hb F Agamma) (Hemoglobin gamma-1 chain) (Hemoglobin gamma-A chain)	0	0	0	0	0	0	0	0	0	1.07202e+06	0	5.90316e+06	2.09311e+07	2.08896e+07	9.03021e+06	4.92688e+07	0	613790	0	15024776	8.52841e+06	0	0	0	0	0	0	0	0	0	0	0	0	0	0	0	0	0	0	0	0
	P55058	PLTP_HUMAN	Phospholipid transfer protein (Lipid transfer protein II)	381228	1.07164e+06	610205	5.35266e+06	238789	0	889777	571004	524004	1.14422e+06	0	1.65089e+06	4.4216e+06	4.57278e+06	1.66729e+07	1.61482e+07	1.24748e+06	1.01249e+06	1803427	5.0715e+06	4.20747e+06	0	1.96355e+06	1.16519e+06	394484	1.86151e+06	2.87061e+06	6.9349e+06	8.69142e+06	1.50902e+06	1.32184e+06	4.38866e+06	3.85315e+06	1.54729e+06	3.90532e+06	4.40746e+06	1.69651e+06	1.28493e+07	1.14264e+06	1.45671e+06	1.71769e+06
	P08603	CFAH_HUMAN	Complement factor H (H factor 1)	1.75588e+06	332790	0	2.25542e+06	328965	0	228905	0	0	274789	0	553872	1.30873e+06	1.12191e+06	3.37772e+06	3.1626e+06	498657	330672	246001	1.59885e+06	1.25299e+06	260593	1.21984e+07	735538	205233	7.95082e+06	5.60506e+06	6.49111e+06	6.71636e+06	1.17501e+07	1.14311e+07	2.99004e+06	7.19926e+06	6.03758e+06	9.34339e+06	3.14647e+06	1.58781e+06	1.63069e+07	2.86719e+06	664313	734202
	P0C0L4	CO4A_HUMAN	Complement C4-A (Acidic complement C4) (C3 and PZP-like alpha-2-macroglobulin domain-containing protein 2) [Cleaved into: Complement C4 beta chain; Complement C4-A alpha chain; C4a anaphylatoxin; C4b-A; C4d-A; Complement C4 gamma chain]	0	605030	0	0	1.21396e+06	0	0	0	0	0	0	456311	992739	889538	3.02392e+06	3.46166e+06	3.30127e+06	0	0	5.07554e+06	5.14608e+06	546326	1.40599e+07	1.12896e+06	0	9.88182e+06	5.4791e+06	5.45465e+06	8.0818e+06	6.38793e+06	1.00722e+07	2.25763e+06	4.08886e+06	7.33558e+06	5.61017e+06	5.9391e+06	2.84074e+06	1.46255e+07	2.0597e+06	1.90539e+06	1.26494e+06
	P02760	AMBP_HUMAN	Protein AMBP [Cleaved into: Alpha-1-microglobulin (Protein HC) (Alpha-1 microglycoprotein) (Complex-forming glycoprotein heterogeneous in charge); Inter-alpha-trypsin inhibitor light chain (ITI-LC) (Bikunin) (EDC1) (HI-30) (Uronic-acid-rich protein); Trypstatin]	3.1689e+06	1.59715e+06	0	3.54942e+06	890434	0	258666	0	0	275403	0	541493	1.17795e+06	988409	3.45063e+06	3.02505e+06	1.23497e+06	1.43338e+06	275281	2.44232e+06	1.73366e+06	624337	9.2727e+06	1.04388e+06	969880	1.25262e+07	6.62439e+06	8.99387e+06	1.12409e+07	9.30566e+06	9.87256e+06	2.821e+06	5.4218e+06	4.47784e+06	6.56323e+06	2.3735e+06	1.71219e+06	1.20892e+07	3.3581e+06	1.02781e+06	1.24685e+06
	P00734	THRB_HUMAN	Prothrombin (EC 3.4.21.5) (Coagulation factor II) [Cleaved into: Activation peptide fragment 1; Activation peptide fragment 2; Thrombin light chain; Thrombin heavy chain]	1.98481e+06	155322	161649	3.193e+06	331552	0	207843	0	0	186062	0	447054	1.16801e+06	952775	3.33952e+06	3.07312e+06	448238	256815	0	1.44849e+06	1.24864e+06	289674	1.26046e+07	779554	563940	1.40051e+07	6.91916e+06	8.45712e+06	1.0852e+07	1.2276e+07	1.20757e+07	2.09081e+06	7.21144e+06	5.03383e+06	6.0514e+06	1.68765e+06	1.38416e+06	1.69258e+07	2.21241e+06	720618	1.12852e+06
	P03952	KLKB1_HUMAN	Plasma kallikrein (EC 3.4.21.34) (Fletcher factor) (Kininogenin) (Plasma prekallikrein) (PKK) [Cleaved into: Plasma kallikrein heavy chain; Plasma kallikrein light chain]	1.04015e+06	0	0	857948	186806	0	0	0	0	0	0	0	0	0	406781	546364	0	0	0	421120	355387	0	2.88827e+06	134761	0	3.14424e+06	1.62402e+06	1.75501e+06	1.95191e+06	3.43063e+06	2.60783e+06	612042	1.5215e+06	1.2609e+06	5.28151e+07	601781	428317	6.51336e+07	717345	140330	212932
	P02746	C1QB_HUMAN	Complement C1q subcomponent subunit B	1.99476e+06	496006	204408	4.09423e+06	490113	0	0	0	0	271531	0	505747	1.18636e+06	1.38302e+06	5.64866e+06	4.81602e+06	1.19634e+06	667285	0	2.98736e+06	2.63049e+06	381111	6.73818e+06	1.1432e+06	0	4.38139e+06	3.38564e+06	9.75529e+06	1.20732e+07	4.22026e+06	7.23489e+06	6.62345e+06	1.38809e+07	2.99906e+06	6.31068e+06	5.46756e+06	2.48268e+06	2.41877e+07	1.7946e+06	1.33755e+06	1.86796e+06
	P61769	B2MG_HUMAN	Beta-2-microglobulin [Cleaved into: Beta-2-microglobulin form pI 5.3]	0	0	0	2.50268e+06	0	0	0	0	0	0	0	408785	1.38218e+06	2.07573e+06	6.29345e+06	5.10724e+06	0	0	0	2.7073e+06	2.32724e+06	1.29024e+06	7.43377e+06	1.69965e+06	3.21733e+06	5.64358e+06	3.68653e+06	8.57996e+06	1.27688e+07	5319835	2.47803e+06	7.15202e+06	1.03968e+07	4.99439e+06	6.71109e+06	2.43013e+06	3.92561e+06	2.4312e+07	3.19065e+06	4.24081e+06	4.43436e+06
	P24158	PRTN3_HUMAN	Myeloblastin (EC 3.4.21.76) (AGP7) (C-ANCA antigen) (Leukocyte proteinase 3) (PR-3) (PR3) (Neutrophil proteinase 4) (NP-4) (P29) (Wegener autoantigen)	0	0	0	1.02954e+06	0	0	0	0	0	385726	0	483508	1.42361e+06	1.45391e+06	4.48915e+06	4.15204e+06	0	0	0	1.40102e+06	954874	0	3.20254e+06	0	0	2.07448e+06	1.80633e+07	2.1323e+07	4.78488e+06	4.36519e+06	3.29444e+06	4.37592e+06	0	1.94685e+06	8.40408e+06	2.0957e+06	0	4.63797e+07	1.05929e+07	1.65064e+06	1.04213e+06
	P60709	ACTB_HUMAN	Actin, cytoplasmic 1 (Beta-actin) [Cleaved into: Actin, cytoplasmic 1, N-terminally processed]	0	0	0	0	0	0	0	0	0	0	0	0	0	0	0	0	0	0	0	1.93198e+06	0	0	4.5627e+06	0	0	1.30054e+06	2.93238e+07	1.99714e+07	3.09057e+06	793038	2.86766e+06	6.22883e+06	0	1.02505e+06	8.32196e+06	3.27727e+06	0	6.58431e+07	1.53491e+06	0	0
	P80188	NGAL_HUMAN	Neutrophil gelatinase-associated lipocalin (NGAL) (25 kDa alpha-2-microglobulin-related subunit of MMP-9) (Lipocalin-2) (Oncogene 24p3) (Siderocalin LCN2) (p25)	0	0	0	1.35658e+06	0	0	0	0	0	0	0	0	372128	563712	2.12778e+06	1.93165e+06	0	538470	0	1.82568e+06	1.29292e+06	642253	5.35783e+06	625927	0	5.23871e+06	9.47811e+06	1.409e+07	7.25438e+06	1.58231e+07	1.12047e+07	1.06981e+07	1.85536e+06	4.9144e+06	8.40876e+06	4.18689e+06	718851	1.75441e+07	7.63024e+06	6.49196e+06	8.06287e+06
	Q9UBP4	DKK3_HUMAN	Dickkopf-related protein 3 (Dickkopf-3) (Dkk-3) (hDkk-3)	1.14426e+06	2.63764e+06	1.2052e+06	3.51953e+06	637539	0	1.14199e+06	1.00247e+06	788480	1.16347e+06	0	1.56555e+06	3.58886e+06	1.86288e+06	5.42623e+06	4.6863e+06	2.54362e+06	2.20168e+06	2.49324e+06	3.36945e+06	2.62385e+06	692406	5.38767e+06	1.33844e+06	1.68249e+06	2.32333e+06	2.92006e+06	5.0722e+06	6.34014e+06	2.70419e+06	3.61726e+06	9.82629e+06	2.07104e+07	1.90274e+06	8.02105e+06	5.85608e+06	4.93653e+06	2.15522e+07	1.57759e+06	1.84919e+06	2.8839e+06
	P06396	GELS_HUMAN	Gelsolin (AGEL) (Actin-depolymerizing factor) (ADF) (Brevin)	1.72745e+06	617962	346609	4.31105e+06	564511	0	678334	229448	311969	662057	355404	1.19718e+06	2.78194e+06	2.20121e+06	7.63082e+06	6.87227e+06	1.25833e+06	988912	713352	3.32204e+06	2.5656e+06	538399	1.07247e+07	1.26624e+06	672464	6.17991e+06	6.51063e+06	8.93395e+06	9.06346e+06	7.06282e+06	4.741e+06	5.7362e+06	1.13013e+07	4.26998e+06	6.53202e+06	3.4395e+06	5.63691e+06	2.32706e+07	1.94061e+06	1.61536e+06	2.65481e+06
	P35542	SAA4_HUMAN	Serum amyloid A-4 protein (Constitutively expressed serum amyloid A protein) (C-SAA)	2.84052e+06	0	0	3.35525e+06	301043	0	0	0	0	0	0	0	1.14877e+06	1.22908e+06	3.41694e+06	3.44643e+06	0	0	0	1.11434e+06	1.07822e+06	0	1.71517e+07	490429	0	1.30185e+07	7.35897e+06	7.64329e+06	9.03937e+06	3.0011e+07	1.75755e+07	2.14968e+06	7.21791e+06	6.21801e+06	8.19166e+06	1.08457e+06	2.18837e+06	1.32209e+07	3.58258e+06	0	0
	P18206	VINC_HUMAN	Vinculin (Metavinculin) (MV)	0	0	0	0	0	0	0	0	0	0	0	0	0	0	6.27819e+07	9.88705e+07	0	0	0	362922	0	0	0	0	0	0	514768	652129	375959	0	0	523047	0	0	660157	0	0	1.25489e+06	0	0	0
	P0C0L5	CO4B_HUMAN	Complement C4-B (Basic complement C4) (C3 and PZP-like alpha-2-macroglobulin domain-containing protein 3) [Cleaved into: Complement C4 beta chain; Complement C4-B alpha chain; C4a anaphylatoxin; C4b-B; C4d-B; Complement C4 gamma chain]	6.29871e+06	1.34541e+06	771834	6.78424e+06	1.21178e+06	0	680762	0	989311	873285	0	1.24239e+06	2.00481e+06	1.78761e+06	6.30178e+06	7.19015e+06	1.26065e+06	913550	0	2.86513e+06	2.59928e+06	418200	1.11794e+07	1.11265e+06	397831	6.67063e+06	4.90737e+06	7.16868e+06	9.41382e+06	1.19578e+07	1.09405e+07	5.14171e+06	1.28673e+07	6.59526e+06	8.49289e+06	3.81529e+06	3.32688e+06	2.3449e+07	4.45939e+06	1.35367e+06	1.78012e+06
	P05155	IC1_HUMAN	Plasma protease C1 inhibitor (C1 Inh) (C1Inh) (C1 esterase inhibitor) (C1-inhibiting factor) (Serpin G1)	4.67798e+06	767378	643260	1.15557e+07	1.14974e+06	0	914928	0	335422	1.02748e+06	440395	2.27084e+06	5.19041e+06	4.99339e+06	1.64243e+07	1.56221e+07	2.24494e+06	1.53003e+06	1.27969e+06	8.92175e+06	6.67382e+06	1.32365e+06	2116407	0	463198	2.18135e+07	1.64086e+06	2.12302e+06	3.3168e+06	2.34506e+07	1.55298e+06	1.71646e+06	1.85075e+06	9.06596e+06	3.21227e+06	936271	5.8114e+06	5714140	7.10292e+06	533927	943574
	P05109	S10A8_HUMAN	Protein S100-A8 (Calgranulin-A) (Calprotectin L1L subunit) (Cystic fibrosis antigen) (CFAG) (Leukocyte L1 complex light chain) (Migration inhibitory factor-related protein 8) (MRP-8) (p8) (S100 calcium-binding protein A8) (Urinary stone protein band A) [Cleaved into: Protein S100-A8, N-terminally processed]	0	0	0	7.71195e+06	1.66407e+06	0	0	0	0	1.51798e+06	0	2.69083e+06	1.04876e+07	8.25979e+06	3.24075e+07	2.70368e+07	0	2.38543e+06	3.59843e+06	1.37061e+07	7.46803e+06	829025	0	0	0	7.23939e+06	4.72187e+06	4.61607e+06	0	1.68225e+07	0	2.11758e+06	0	4.56875e+06	3.81617e+06	0	0	9.47217e+06	7.51912e+06	1.23348e+06	0
	P08571	CD14_HUMAN	Monocyte differentiation antigen CD14 (Myeloid cell-specific leucine-rich glycoprotein) (CD antigen CD14) [Cleaved into: Monocyte differentiation antigen CD14, urinary form; Monocyte differentiation antigen CD14, membrane-bound form]	271828	1.8125e+06	968134	5.65054e+06	381134	0	900554	0	0	1.27069e+06	0	2.13375e+06	4.60338e+06	4.21708e+06	1.14829e+07	1.05402e+07	1.99e+06	2.59995e+06	1.71353e+06	7.97622e+06	5.62848e+06	277363	3.9396e+06	939439	278902	3.11099e+06	5.78659e+06	1.0347e+07	1.3743e+07	5.5694e+06	3.25351e+06	7.78351e+06	9.98192e+06	5.1459e+06	8.53117e+06	6.74641e+06	3.90262e+06	3.09964e+07	1.95473e+06	3013072	4.96069e+06
	P02656	APOC3_HUMAN	Apolipoprotein C-III (Apo-CIII) (ApoC-III) (Apolipoprotein C3)	1.85168e+07	0	0	4.01622e+06	2.03651e+06	0	339812	0	0	150083	0	419059	1.28186e+06	1.26102e+06	5.78418e+06	2.74266e+06	531886	0	0	1.39717e+06	1.06017e+06	65888.3	7.48069e+06	464340	0	3.94742e+07	1.13737e+07	1.07443e+07	8.05956e+06	2.92881e+07	1.85348e+07	598147	6.416e+06	3.60221e+06	0	498417	1.07813e+06	2.79286e+07	2.52431e+06	0	0
	P01042	KNG1_HUMAN	Kininogen-1 (Alpha-2-thiol proteinase inhibitor) (Fitzgerald factor) (High molecular weight kininogen) (HMWK) (Williams-Fitzgerald-Flaujeac factor) [Cleaved into: Kininogen-1 heavy chain; T-kinin (Ile-Ser-Bradykinin); Bradykinin (Kallidin I); Lysyl-bradykinin (Kallidin II); Kininogen-1 light chain; Low molecular weight growth-promoting factor]	3.57042e+06	756276	552339	4.23747e+06	1.09143e+06	0	0	0	0	698287	0	809849	1.71686e+06	1.79292e+06	3.9617e+06	4.21661e+06	1.00001e+06	456359	508588	3.64224e+06	2.88609e+06	217909	1.91827e+07	689338	487516	1.8866e+07	1.09658e+07	1.33341e+07	1.69323e+07	1.51967e+07	1.37586e+07	3.56315e+06	1.01626e+07	6.79769e+06	9.44528e+06	3.59564e+06	2.19033e+06	2.57328e+07	4.18793e+06	1.09818e+06	1.76359e+06
	P36222	CH3L1_HUMAN	Chitinase-3-like protein 1 (39 kDa synovial protein) (Cartilage glycoprotein 39) (CGP-39) (GP-39) (hCGP-39) (YKL-40)	398230	1.23836e+06	555205	3.60647e+06	1.16608e+06	0	876334	429027	640149	2.55034e+06	1.1712e+06	2.82175e+06	5.36612e+06	4.46549e+06	1.10461e+07	8.37962e+06	1.50779e+06	1.26489e+06	1.03462e+06	2.72956e+06	1.95856e+06	690810	1.56692e+06	2.8501e+06	601225	1.51742e+06	8.21714e+06	2.85132e+07	1.09082e+07	5.90863e+06	2.14742e+06	1.66704e+07	3.89665e+06	7.90664e+06	1.78962e+07	1.19916e+07	3.96085e+06	2.17114e+07	7.50209e+06	12994074	1.04546e+07
	P01023	A2MG_HUMAN	Alpha-2-macroglobulin (Alpha-2-M) (C3 and PZP-like alpha-2-macroglobulin domain-containing protein 5)	9.48092e+06	1.15969e+06	552396	6.18399e+06	2.20218e+06	322010	980481	638843	444260	1.32306e+06	683439	1.91432e+06	3.91033e+06	2.82189e+06	9.2868e+06	7.94081e+06	2.68373e+06	1.24367e+06	1.22764e+06	4.67926e+06	3.80513e+06	2.48744e+06	1.71832e+07	964052	517477	2.27336e+07	5.50653e+06	6.64108e+06	7.50583e+06	2.76126e+07	1.17657e+07	3.50525e+06	6.36052e+06	1.38446e+07	1.19916e+07	3.03634e+06	3.17469e+06	1.31371e+07	7.86655e+06	1.08032e+06	1.55315e+06
	Q00610	CLH1_HUMAN	Clathrin heavy chain 1 (Clathrin heavy chain on chromosome 17) (CLH-17)	0	0	0	1.39589e+07	0	0	0	0	0	0	0	0	0	0	0	0	0	0	0	1.08842e+07	0	0	0	0	0	0	4.2119e+07	6.42431e+07	0	0	0	0	0	0	5.43598e+07	0	0	4.74098e+07	0	0	0
	P01877	IGHA2_HUMAN	Ig alpha-2 chain C region	4.7248e+06	0	0	8.8921e+06	6.71646e+06	0	0	0	0	0	0	0	1.48052e+06	1.75943e+06	5.5541e+06	8.60356e+06	4.57643e+06	0	0	2.754e+06	2.44988e+06	0	0	0	0	2.53503e+07	9.8016e+06	1.07935e+07	1.12143e+07	1.60894e+07	1.12855e+07	2.26178e+06	6.54222e+06	1.75741e+07	2.26359e+07	4.47528e+06	1.34321e+06	1.17015e+07	3.09995e+06	1.07378e+07	2.10865e+07
	P02747	C1QC_HUMAN	Complement C1q subcomponent subunit C	3.20965e+06	638296	491826	6.02552e+06	430852	0	556118	0	0	430149	0	1.24683e+06	2.95253e+06	2.75685e+06	8.96556e+06	7.91812e+06	991298	439502	0	5.40088e+06	5.76396e+06	348334	1.19688e+07	1.70765e+06	364082	9.4682e+06	7.00615e+06	1.48386e+07	2.20219e+07	1.24674e+07	8.08089e+06	1.1196e+07	2.15024e+07	5.34595e+06	1.31187e+07	8.40131e+06	5.39983e+06	3.67373e+07	1.97427e+06	3.50848e+06	3.66127e+06
	P0DJI9	SAA2_HUMAN	Serum amyloid A-2 protein (SAA2)	0	0	0	5.30519e+06	0	0	0	0	0	0	0	0	0	0	0	0	0	0	0	0	0	0	9.91445e+06	1.8689e+06	0	0	4.0649e+06	7.53235e+06	0	6.65083e+07	6.48412e+07	3.11903e+06	0	2.20531e+07	1.33423e+07	2.51354e+06	2.25493e+06	3.75653e+07	3.8711e+06	2.30503e+06	911261
	P00751	CFAB_HUMAN	Complement factor B (EC 3.4.21.47) (C3/C5 convertase) (Glycine-rich beta glycoprotein) (GBG) (PBF2) (Properdin factor B) [Cleaved into: Complement factor B Ba fragment; Complement factor B Bb fragment]	2.80379e+06	1.60754e+06	1.18076e+06	4.79087e+06	1.214e+06	0	483228	899432	466711	1.39265e+06	662597	869702	1.60206e+06	1.5379e+06	3.96858e+06	3.82948e+06	1.4274e+06	1.03843e+06	1.36596e+06	2.23206e+06	1.96248e+06	480383	2.15259e+07	1.2847e+06	434975	9.41517e+06	7.78819e+06	1.178e+07	1.11953e+07	2.37458e+07	2.09957e+07	4.37477e+06	1.03501e+07	1.22172e+07	1.66055e+07	4.304e+06	3.16878e+06	3.95287e+07	1.00348e+07	4.479e+06	3.86082e+06
	P01019	ANGT_HUMAN	Angiotensinogen (Serpin A8) [Cleaved into: Angiotensin-1 (Angiotensin 1-10) (Angiotensin I) (Ang I); Angiotensin-2 (Angiotensin 1-8) (Angiotensin II) (Ang II); Angiotensin-3 (Angiotensin 2-8) (Angiotensin III) (Ang III) (Des-Asp[1]-angiotensin II); Angiotensin-4 (Angiotensin 3-8) (Angiotensin IV) (Ang IV); Angiotensin 1-9; Angiotensin 1-7; Angiotensin 1-5; Angiotensin 1-4]	3.42103e+06	1.25716e+06	760146	4.97619e+06	933758	0	884753	403851	581694	1.33966e+06	717886	1.22255e+06	3.1839e+06	2.609e+06	7.08673e+06	7.60383e+06	2.03138e+06	1.48988e+06	1.21914e+06	4.86324e+06	3.6255e+06	1.1372e+06	1.1569e+07	2.77717e+06	2.3111e+06	1.46425e+07	1.30015e+07	1.90384e+07	2.00904e+07	9.45804e+06	1.15022e+07	1.13305e+07	2.19762e+07	5.70735e+06	1.09518e+07	6.62232e+06	4.71627e+06	3.78436e+07	3.57578e+06	2.40087e+06	4.40841e+06
	P02749	APOH_HUMAN	Beta-2-glycoprotein 1 (APC inhibitor) (Activated protein C-binding protein) (Anticardiolipin cofactor) (Apolipoprotein H) (Apo-H) (Beta-2-glycoprotein I) (B2GPI) (Beta(2)GPI)	3.98165e+06	1.12267e+06	0	5.31338e+06	2.40531e+06	0	0	0	475120	1.212e+06	0	1.12701e+06	2.10551e+06	1.88098e+06	3.11495e+06	4.47106e+06	1.97322e+06	1.01118e+06	0	3.77797e+06	3.20116e+06	636738	1.99898e+07	3.33353e+06	2.51666e+06	2.39046e+07	1.78044e+07	2.04277e+07	2.56252e+07	1.67617e+07	1.79024e+07	6.05885e+06	1.30882e+07	9.3753e+06	1.20508e+07	4458413	3.54977e+06	3.32304e+07	6.4095e+06	2.98991e+06	4.52616e+06
	P01871	IGHM_HUMAN	Ig mu chain C region	9.08891e+06	0	0	8.20227e+06	3.11228e+06	0	879520	0	152527	0	0	753203	3.89831e+06	2.86763e+06	1.52668e+07	1.12183e+07	2.19128e+06	0	0	5.69916e+06	4.82995e+06	413084	2.04473e+07	526868	0	1.68979e+07	1.32817e+07	9.73844e+06	7.30625e+06	3.04047e+07	2.40693e+07	4.18739e+06	3.3612e+06	1.82277e+07	2.21055e+07	7.35285e+06	469454	4.17662e+07	5.10847e+06	609797	885553
	P00450	CERU_HUMAN	Ceruloplasmin (EC 1.16.3.1) (Ferroxidase)	5.58104e+06	1.5275e+06	1.068e+06	6.96718e+06	1.41339e+06	0	1.28528e+06	982915	1.03673e+06	1.57397e+06	1.44623e+06	1.76117e+06	2.98634e+06	2.89015e+06	6.33693e+06	5.83406e+06	1.8657e+06	1.28685e+06	1.5873e+06	4.22929e+06	3.63935e+06	1.9914e+06	2.07526e+07	2.36906e+06	1.56562e+06	1.37139e+07	1.08562e+07	1.41719e+07	1.66147e+07	2.33447e+07	2.55872e+07	7.45774e+06	1.23404e+07	1.3811e+07	1.84273e+07	6.5216e+06	5.0209e+06	4.75536e+07	9.925e+06	3.23038e+06	3.91938e+06
	P61626	LYSC_HUMAN	Lysozyme C (EC 3.2.1.17) (1,4-beta-N-acetylmuramidase C)	0	0	0	4.37204e+06	145946	0	0	0	0	0	0	776768	1.77443e+06	1.56741e+06	5.47338e+06	6.14536e+06	0	462848	0	3.40542e+06	2.16698e+06	656901	9.07586e+06	1.12633e+06	360748	1.04735e+07	1.785e+07	2.1776e+07	1.64369e+07	2.29291e+07	2.12128e+07	1.78436e+07	7.23797e+06	1.33437e+07	3.35684e+07	1.38638e+07	2.77344e+06	6.80765e+07	8.79252e+06	3.3896e+06	3.76223e+06
	P04220	MUCB_HUMAN	Ig mu heavy chain disease protein (BOT)	1.16983e+07	0	0	7.22062e+06	7.37486e+06	0	0	0	1.00654e+06	682764	0	1.46421e+06	0	5.73758e+06	0	9.76178e+06	0	0	0	0	0	3.96273e+06	3.03692e+07	0	0	1.7873e+07	1.56235e+07	1.50694e+07	8.76709e+06	1.57521e+07	3.75338e+07	0	0	2.25294e+07	3.84844e+07	1.14104e+07	0	6.48469e+07	6.25543e+06	0	0
	P02765	FETUA_HUMAN	Alpha-2-HS-glycoprotein (Alpha-2-Z-globulin) (Ba-alpha-2-glycoprotein) (Fetuin-A) [Cleaved into: Alpha-2-HS-glycoprotein chain A; Alpha-2-HS-glycoprotein chain B]	8.64975e+06	745634	418070	7.41277e+06	1.08444e+06	0	614542	0	0	851254	0	1.31186e+06	3.83491e+06	2.64687e+06	1.10962e+07	8.62357e+06	1.19865e+06	401670	0	4.15827e+06	2.98985e+06	1.04679e+06	3.85186e+07	1.49235e+06	0	2.17614e+07	1.33965e+07	1.88931e+07	2.13557e+07	3.71003e+07	2.88444e+07	6.8594e+06	1.56314e+07	1.54914e+07	1.81652e+07	5.59826e+06	3.19623e+06	2.73379e+07	4.6266e+06	1.06713e+06	1.06162e+06
	P04004	VTNC_HUMAN	Vitronectin (VN) (S-protein) (Serum-spreading factor) (V75) [Cleaved into: Vitronectin V65 subunit; Vitronectin V10 subunit; Somatomedin-B]	6.78809e+06	1.67841e+06	692132	1.10484e+07	1.5551e+06	0	1.2165e+06	816979	826957	1.29249e+06	1.10398e+06	1.85013e+06	3.91958e+06	3.22138e+06	9.12885e+06	1.02195e+07	1.12915e+06	1.14096e+06	1.21913e+06	4.61164e+06	4.0041e+06	306188	2.90785e+07	2.23105e+06	595313	2.27812e+07	1.42082e+07	1.82438e+07	1.8494e+07	3.57865e+07	2.8853e+07	4.17224e+06	1.72647e+07	1.10855e+07	9.18763e+06	3.47363e+06	4.0566e+06	5.80954e+07	1.08395e+07	1.97519e+06	2.05978e+06
	P10451	OSTP_HUMAN	Osteopontin (Bone sialoprotein 1) (Nephropontin) (Secreted phosphoprotein 1) (SPP-1) (Urinary stone protein) (Uropontin)	1.06907e+06	738504	644881	1.28685e+07	607036	0	2.57729e+06	0	839967	2.35632e+06	640316	3.45786e+06	9.09508e+06	7.2073e+06	2.48156e+07	2.30619e+07	2.28231e+06	3.36118e+06	2.15454e+06	1.92501e+07	1.24082e+07	3.14384e+06	6.33259e+06	5.01702e+06	2.85373e+06	4.65701e+06	8.48864e+06	1.98292e+07	1.48759e+07	7.10093e+06	7.35211e+06	3.0874e+07	1.22037e+07	6.40018e+06	1.72684e+07	1.51281e+07	5.17293e+06	3.79846e+07	2.14408e+06	1.93621e+07	1.37398e+07
	P02774	VTDB_HUMAN	Vitamin D-binding protein (DBP) (VDB) (Gc protein-derived macrophage activating factor) (Gc-MAF) (GcMAF) (Gc-globulin) (Group-specific component) (Gc) (Vitamin D-binding protein-macrophage activating factor) (DBP-maf)	4.10815e+06	2.31851e+06	999675	6.80808e+06	1.05926e+06	0	561739	6.77203e+06	0	1.00497e+06	0	968785	2.3597e+06	1.98395e+06	6.60489e+06	5.98932e+06	1.1403e+06	763247	593277	3.99796e+06	3.29775e+06	1.22847e+06	2.72142e+07	2.05384e+06	1.33718e+06	2.84331e+07	1.88211e+07	2.52251e+07	3.43309e+07	3.61309e+07	2.96331e+07	6.25666e+06	2.15992e+07	1.5792e+07	2.05662e+07	5.94226e+06	4.94191e+06	4.57293e+07	7.64602e+06	2.49391e+06	3.10852e+06
	P02649	APOE_HUMAN	Apolipoprotein E (Apo-E)	3.92051e+06	2.24811e+06	1.92174e+06	1.27814e+07	855326	0	3.22914e+06	1.80747e+06	1.52243e+06	1.81516e+06	2.00803e+06	4.86434e+06	1.24913e+07	7.54015e+06	2.9312e+07	2.36674e+07	1.73764e+06	1.68649e+06	4.12234e+06	1.00593e+07	7.89766e+06	585890	1.02886e+07	2.02162e+06	1.00963e+06	7.75735e+06	6.05659e+06	1.00919e+07	1.79693e+07	1.56292e+07	8.78464e+06	1.76562e+07	7.41211e+07	6.54387e+06	1.3203e+07	1.09184e+07	1.78858e+07	2.59667e+07	3.88264e+06	2.68699e+06	3.90041e+06
	P36955	PEDF_HUMAN	Pigment epithelium-derived factor (PEDF) (Cell proliferation-inducing gene 35 protein) (EPC-1) (Serpin F1)	3.42701e+06	850465	503177	7.78436e+06	938228	0	949920	1.14467e+06	957624	1.09793e+06	807205	1.79628e+06	5.34217e+06	4.62547e+06	1.67245e+07	1.85668e+07	2.90128e+06	2.58565e+06	1.15037e+06	9.3729e+06	7.75953e+06	7.18664e+06	1.60703e+07	1.44327e+07	1.35927e+07	1.35103e+07	1.31198e+07	2.16766e+07	2.57173e+07	1.24975e+07	1.3347e+07	2.70831e+07	2.09726e+07	1.03685e+07	1.97813e+07	1.17124e+07	1.09164e+07	5.70807e+07	7.39869e+06	1.33101e+07	2.09572e+07
	P04217	A1BG_HUMAN	Alpha-1B-glycoprotein (Alpha-1-B glycoprotein)	6.03918e+06	1.01401e+06	477670	8.78731e+06	1.303e+06	0	667006	412345	377027	1.01448e+06	0	1.54317e+06	3.80583e+06	3.01348e+06	8.89098e+06	7.78517e+06	1.38664e+06	763899	605005	5.17542e+06	3.84833e+06	1.03831e+06	3.69436e+07	1.74128e+06	839337	2.62558e+07	1.87618e+07	2.32637e+07	3.45442e+07	4.13951e+07	3.91371e+07	9.50048e+06	2.0388e+07	1.63452e+07	2.60669e+07	7.26485e+06	5.39109e+06	60348544	8.4698e+06	2.37214e+06	3.11302e+06
	P02750	A2GL_HUMAN	Leucine-rich alpha-2-glycoprotein (LRG)	1.67928e+06	548330	330175	9.38548e+06	640340	0	1.09459e+06	0	0	959088	0	1.33421e+06	3.664e+06	2.86039e+06	1.13795e+07	7.07004e+06	1.10457e+06	1.42525e+06	891855	6.38371e+06	5.10618e+06	1.17723e+06	2.57421e+07	1.91596e+06	742613	1.01594e+07	1.00981e+07	1.75122e+07	1.61839e+07	4.16774e+07	2.92593e+07	1.00347e+07	1.3995e+07	2.29468e+07	2.79868e+07	8.92391e+06	9.15149e+06	1.19056e+08	1.5594e+07	3.49912e+06	4.2814e+06
	P02671	FIBA_HUMAN	Fibrinogen alpha chain [Cleaved into: Fibrinopeptide A; Fibrinogen alpha chain]	1.32653e+06	2.25074e+06	909907	9.59802e+06	1.81183e+06	0	1.94655e+06	1.85701e+06	895585	2.66515e+06	2.20865e+06	5.81387e+06	1.14781e+07	9.31617e+06	1.4042e+07	1.47345e+07	2.30782e+06	2.12178e+06	2.22782e+06	5.80032e+06	4.9526e+06	315611	6.14678e+07	845273	290826	1.83317e+07	1.98466e+07	1.69756e+07	1.23598e+07	3.48974e+07	1.81981e+07	6.59646e+06	6.81871e+06	4.02432e+07	3.82846e+07	9.36052e+06	1.76815e+06	4.88534e+07	1.24573e+07	2.61379e+06	2.12853e+06
	P32119	PRDX2_HUMAN	Peroxiredoxin-2 (EC 1.11.1.15) (Natural killer cell-enhancing factor B) (NKEF-B) (PRP) (Thiol-specific antioxidant protein) (TSA) (Thioredoxin peroxidase 1) (Thioredoxin-dependent peroxide reductase 1)	0	1.00887e+06	1.49183e+06	2.89637e+07	1.1599e+06	0	1.73589e+07	3.47051e+06	2.53836e+06	4.19197e+06	2.70295e+06	1.37821e+07	4.41364e+07	4.33864e+07	1.42234e+08	9.38373e+07	3.41867e+06	3.67863e+06	5.42681e+06	2.02901e+07	1.02173e+07	0	1.2449e+06	0	0	988136	1.41071e+06	1.58677e+06	0	0	0	0	0	0	6.82828e+06	203642	0	0	653244	231509	440881
	P00739	HPTR_HUMAN	Haptoglobin-related protein	1553680	0	0	3.86809e+06	0	0	0	0	0	0	0	0	0	0	0	0	0	0	0	0	0	0	2.61998e+07	0	0	7.87104e+06	2.6372e+07	2.37342e+06	2.23979e+06	1.75402e+08	8.30772e+07	0	0	7.48491e+07	3.90886e+06	945487	0	4.13543e+06	7.02446e+07	0	0
	P00915	CAH1_HUMAN	Carbonic anhydrase 1 (EC 4.2.1.1) (Carbonate dehydratase I) (Carbonic anhydrase B) (CAB) (Carbonic anhydrase I) (CA-I)	497558	677013	1.28767e+06	3.93908e+07	1.07735e+06	2.84793e+06	1.47359e+07	1.79687e+06	2.8562e+06	4.30273e+06	2.02883e+06	1.54162e+07	4.35152e+07	3.61828e+07	1.47947e+08	1.00425e+08	2.04124e+06	3.11103e+06	4.56306e+06	3.07504e+07	1.7777e+07	316188	1.54399e+06	0	279154	1.68988e+06	1.32046e+06	1793922	1.0689e+06	0	560085	0	0	0	4.36199e+06	494366	0	0	408466	171432	345749
	P01024	CO3_HUMAN	Complement C3 (C3 and PZP-like alpha-2-macroglobulin domain-containing protein 1) [Cleaved into: Complement C3 beta chain; C3-beta-c (C3bc); Complement C3 alpha chain; C3a anaphylatoxin; Acylation stimulating protein (ASP) (C3adesArg); Complement C3b alpha' chain; Complement C3c alpha' chain fragment 1; Complement C3dg fragment; Complement C3g fragment; Complement C3d fragment; Complement C3f fra…	1.20654e+07	1.68108e+06	993072	1.63464e+07	2.23876e+06	0	1.32897e+06	729291	752572	1.95858e+06	1.01749e+06	2.5222e+06	6.18479e+06	5.28531e+06	1.56476e+07	1.47871e+07	2.81924e+06	1.75689e+06	1.71398e+06	9.91605e+06	8.34118e+06	1.75376e+06	3.30115e+07	2.50031e+06	1.10788e+06	4.31693e+07	2.06613e+07	2.41802e+07	2.90738e+07	5.81931e+07	3.14669e+07	9.4945e+06	1.92262e+07	2.19233e+07	2.19869e+07	8.33614e+06	7.83511e+06	5.47428e+07	1.44259e+07	4.219e+06	5.56828e+06
	P01861	IGHG4_HUMAN	Ig gamma-4 chain C region	1.4396e+07	2.08667e+06	1.16275e+06	6.87783e+06	5.24004e+06	0	960802	0	0	893900	0	0	0	1.06337e+06	2.39578e+06	2.3407e+06	6.62389e+06	2.04094e+06	1.07901e+06	3.98407e+06	4.77055e+06	4.25622e+06	7.78252e+07	4.63446e+06	1.98403e+06	1.74167e+07	1.27747e+07	1.36194e+07	1.58096e+07	6.77722e+07	6.14748e+07	1.94382e+07	4.08808e+07	3.44944e+07	3.81712e+07	1.35789e+07	6.02889e+06	4.54363e+07	2.87835e+06	563441	677164
	P15814	IGLL1_HUMAN	Immunoglobulin lambda-like polypeptide 1 (CD179 antigen-like family member B) (Ig lambda-5) (Immunoglobulin omega polypeptide) (Immunoglobulin-related protein 14.1) (CD antigen CD179b)	1.54327e+07	0	0	1.13245e+07	0	0	0	0	0	0	0	0	4.43762e+06	4.06416e+06	0	1.60018e+07	0	0	0	0	1.40645e+07	6.77088e+06	4.45447e+07	2.28001e+06	0	9.36104e+07	1.65704e+07	1.95129e+07	2.22606e+07	7.02064e+07	3.10972e+07	9.87423e+06	0	6.69126e+07	2.96762e+07	1.39519e+07	1.21942e+07	1.74686e+07	1.50144e+07	2.61066e+06	0
	P01034	CYTC_HUMAN	Cystatin-C (Cystatin-3) (Gamma-trace) (Neuroendocrine basic polypeptide) (Post-gamma-globulin)	4.4055e+06	3.1059e+06	1.47143e+06	1.42513e+07	1.48405e+06	0	4.14493e+06	783722	1.73004e+06	2.09614e+06	1.13559e+06	5.06104e+06	1.21212e+07	9.80358e+06	3.53518e+07	2.46069e+07	4.54588e+06	3.66168e+06	2.38788e+06	1.22043e+07	1.1133e+07	3.32552e+06	1.98263e+07	5.87483e+06	4.73864e+06	1.38873e+07	1.38663e+07	2.69592e+07	3.5577e+07	1.32919e+07	1.44934e+07	2.77083e+07	7.11387e+07	9.00847e+06	2.32641e+07	1.43589e+07	1.54664e+07	6.86104e+07	4.51628e+06	5.72631e+06	1.01639e+07
	P01033	TIMP1_HUMAN	Metalloproteinase inhibitor 1 (Erythroid-potentiating activity) (EPA) (Fibroblast collagenase inhibitor) (Collagenase inhibitor) (Tissue inhibitor of metalloproteinases 1) (TIMP-1)	485183	1.15438e+06	1.18269e+06	1.7712e+07	477965	0	1.45912e+06	1.08914e+06	904712	2.81071e+06	1.60071e+06	5.96012e+06	1.539e+07	1.43704e+07	4.29837e+07	3.68051e+07	1.66497e+06	4.12153e+06	4.09623e+06	2.84447e+07	1.67717e+07	831662	4.00119e+07	1.7427e+06	366463	1.0022e+07	3.51642e+07	4.31777e+07	2.06646e+07	1.79079e+07	1.12818e+07	1.32809e+07	1.89716e+07	2.24692e+07	3.9355e+07	1.9502e+07	2.91684e+06	6.04158e+07	3.83938e+06	2.84745e+06	2.77597e+06
	P19652	A1AG2_HUMAN	Alpha-1-acid glycoprotein 2 (AGP 2) (Orosomucoid-2) (OMD 2)	1.0185e+07	1.49844e+06	1.3621e+06	2.03267e+07	3.31318e+06	0	1.76719e+06	0	1.12466e+06	2.10811e+06	1.18738e+06	4.17997e+06	6.6097e+06	6.82628e+06	2.85699e+07	1.92808e+07	2.62139e+06	1.9763e+06	1.94008e+06	1.01428e+07	8.06838e+06	2.96524e+06	2.20861e+07	3.08854e+06	2.16519e+06	3.38104e+07	1.64265e+07	2.19247e+07	1.9869e+07	6.9201e+07	3.72573e+07	1.24522e+07	3.73885e+07	2.42487e+07	1.30382e+07	8.99282e+06	1.07179e+07	7.73377e+07	1.8532e+07	4.79655e+06	3.51836e+06
	P02675	FIBB_HUMAN	Fibrinogen beta chain [Cleaved into: Fibrinopeptide B; Fibrinogen beta chain]	1.34721e+06	859878	368600	1.19917e+07	2.25709e+06	3.50834e+06	2.58165e+06	609337	804089	1.8148e+06	1.22186e+06	5.86468e+06	1.20113e+07	1.1709e+07	1.93295e+07	1.87251e+07	1.57047e+06	2.00232e+06	1.41827e+06	7.35457e+06	5.30968e+06	375527	8.73091e+07	1.00315e+06	228956	2.87982e+07	3.02544e+07	2.19648e+07	1.30183e+07	3.59961e+07	1.55636e+07	5.92166e+06	7.93787e+06	5.07033e+07	6.601e+07	1.05501e+07	2.41172e+06	6.18962e+07	1.4768e+07	3.14785e+06	3.1458e+06
	P10909	CLUS_HUMAN	Clusterin (Aging-associated gene 4 protein) (Apolipoprotein J) (Apo-J) (Complement cytolysis inhibitor) (CLI) (Complement-associated protein SP-40,40) (Ku70-binding protein 1) (NA1/NA2) (Testosterone-repressed prostate message 2) (TRPM-2) [Cleaved into: Clusterin beta chain (ApoJalpha) (Complement cytolysis inhibitor a chain); Clusterin alpha chain (ApoJbeta) (Complement cytolysis inhibitor b cha…	6.82706e+06	5.04898e+06	2.8004e+06	1.91656e+07	2.90259e+06	0	4.69495e+06	4.73964e+06	2.68034e+06	4.89077e+06	3529975	6.85847e+06	1.41738e+07	1.15992e+07	3.03386e+07	3.18948e+07	5.58601e+06	6.65164e+06	4.55223e+06	1.86462e+07	1.45121e+07	1.74745e+06	2.37607e+07	5.26071e+06	3.55253e+06	2.89008e+07	2.063e+07	3.3208e+07	3.74606e+07	2.12228e+07	1.8017e+07	2.17351e+07	3.80647e+07	1.37855e+07	1.76237e+07	1.28119e+07	9.72776e+06	7.45815e+07	7.03635e+06	9.43544e+06	1.05479e+07
	P02679	FIBG_HUMAN	Fibrinogen gamma chain	2.48624e+06	1.40152e+06	776856	1.33754e+07	4.41751e+06	0	3.27296e+06	923780	1.09508e+06	2.73787e+06	2.18516e+06	7.16885e+06	1.38738e+07	1.26932e+07	2.03996e+07	2.08479e+07	4.35703e+06	3.94765e+06	2.188e+06	9.52211e+06	7.28429e+06	342904	1.08437e+08	1.06721e+06	381892	3.16814e+07	3.43035e+07	2.59154e+07	1.58245e+07	4.24595e+07	2.07925e+07	8.30888e+06	9.86089e+06	4.5203e+07	6.90561e+07	1.36878e+07	2.26316e+06	8.16942e+07	1.53052e+07	3.71446e+06	4.25686e+06
	P02652	APOA2_HUMAN	Apolipoprotein A-II (Apo-AII) (ApoA-II) (Apolipoprotein A2) [Cleaved into: Proapolipoprotein A-II (ProapoA-II); Truncated apolipoprotein A-II (Apolipoprotein A-II(1-76))]	9.69831e+06	4.37658e+06	961791	1.0776e+07	3.15989e+06	0	0	1.03217e+06	0	1.94189e+06	0	1.41993e+06	4.1714e+06	2.62875e+06	1.00802e+07	8.26948e+06	3.22726e+06	981824	0	3.24103e+06	2.05254e+06	5.60893e+06	8.26951e+07	5.00026e+06	410106	8.14114e+07	4.20125e+07	4.99051e+07	5.34576e+07	6.62055e+07	5.2468e+07	8.12984e+06	1.49905e+07	3.1592e+07	4.17721e+07	8.94933e+06	1.08746e+07	6.55607e+07	1.81715e+07	1.04222e+06	514468
	P0DJI8	SAA1_HUMAN	Serum amyloid A-1 protein (SAA) [Cleaved into: Amyloid protein A (Amyloid fibril protein AA); Serum amyloid protein A(2-104); Serum amyloid protein A(3-104); Serum amyloid protein A(2-103); Serum amyloid protein A(2-102); Serum amyloid protein A(4-101)]	0	0	0	1.84254e+07	0	0	0	0	0	0	0	0	0	0	0	0	5.26779e+06	0	0	3.32029e+06	2.18145e+06	1.21851e+06	2.66855e+07	4.90457e+06	0	5.81131e+06	9.2849e+06	2.76595e+07	4.06554e+06	1.63197e+08	1.45793e+08	7.67821e+06	4.36755e+06	7.41993e+07	3.5972e+07	5.26839e+06	3.67881e+06	1.37072e+08	1.78828e+07	4.44094e+06	1.88134e+06
	P01860	IGHG3_HUMAN	Ig gamma-3 chain C region (HDC) (Heavy chain disease protein)	1.56041e+07	921382	631279	1.02012e+07	1.1134e+06	0	0	0	0	345689	0	506371	1.85603e+06	1.98346e+06	1.02182e+07	1.14845e+07	653124	0	0	1.24181e+06	800805	4.16249e+06	1.272e+08	4.78144e+06	1.83994e+06	3.49585e+07	1.90581e+07	2.44025e+07	2.7126e+07	1.29374e+08	7.92872e+07	1.31141e+07	3.89255e+07	5.75858e+07	6.94335e+07	1.16711e+07	4.88787e+06	5.04168e+07	1.04171e+07	2.1293e+06	2.37843e+06
	P05090	APOD_HUMAN	Apolipoprotein D (Apo-D) (ApoD)	3.13335e+06	732940	774594	2.96678e+07	849222	0	2.42877e+06	0	402028	2.3829e+06	0	7.62215e+06	2.47433e+07	2.28407e+07	5.73032e+07	7.16047e+07	2.61561e+06	894199	1.21474e+06	2.21135e+07	1.60065e+07	1.14359e+06	5.14593e+07	2.91355e+06	854230	2.41637e+07	1.07846e+07	2.52814e+07	4.63904e+07	2.8256e+07	1.32118e+07	1.41237e+07	7.60247e+07	2.07351e+07	1.73603e+07	1.03718e+07	5.95015e+07	2.4595e+08	7.31887e+06	1.90914e+06	1.59022e+06
	P01011	AACT_HUMAN	Alpha-1-antichymotrypsin (ACT) (Cell growth-inhibiting gene 24/25 protein) (Serpin A3) [Cleaved into: Alpha-1-antichymotrypsin His-Pro-less]	9.01752e+06	2.46956e+06	1.92744e+06	2.71374e+07	3.94751e+06	0	2.65674e+06	2.46503e+06	1.66138e+06	4.90093e+06	2.3991e+06	5.3274e+06	1.32535e+07	9.58927e+06	3.63941e+07	2.50117e+07	3.96135e+06	4.88161e+06	3.06214e+06	2.07099e+07	2.08671e+07	8.26685e+06	3.85876e+07	5.12595e+06	2.54825e+06	3.46106e+07	1.69354e+07	4.05035e+07	4.46945e+07	6.60439e+07	4.84398e+07	1.26024e+07	3.51672e+07	4.79096e+07	3.64656e+07	1.21506e+07	2.69008e+07	2.84227e+08	3.79603e+07	9.64072e+06	7.97578e+06
	Q86YA3	ZGRF1_HUMAN	Protein ZGRF1 (GRF-type zinc finger domain-containing protein 1)	0	0	0	0	0	0	0	0	0	0	0	0	0	0	0	0	0	0	0	0	0	0	1.75523e+08	0	0	0	6.14725e+07	1.7797e+08	1.60313e+08	0	1.76206e+08	2.94017e+07	6.90458e+07	0	5.53622e+07	2.97895e+07	0	1.55934e+08	0	0	0
	P02647	APOA1_HUMAN	Apolipoprotein A-I (Apo-AI) (ApoA-I) (Apolipoprotein A1) [Cleaved into: Proapolipoprotein A-I (ProapoA-I); Truncated apolipoprotein A-I (Apolipoprotein A-I(1-242))]	4.32835e+07	3.31346e+06	2.16351e+06	2.80163e+07	1.06139e+07	1.68867e+06	3.85935e+06	1.80191e+06	1.90694e+06	4.72134e+06	1.57689e+06	5.76212e+06	1.31796e+07	1.07551e+07	2.64376e+07	2.47037e+07	1.44848e+07	4.27994e+06	3.25862e+06	1.75104e+07	1.33694e+07	2.61692e+06	1.46837e+08	2.79066e+06	1.25007e+06	1.16324e+08	6.20417e+07	6.31696e+07	8.13465e+07	1.32632e+08	7.03516e+07	1.46221e+07	2.76824e+07	5.93451e+07	5.69989e+07	1.56446e+07	1.86519e+07	7.46474e+07	2.47526e+07	2.34123e+06	2.84526e+06
	P01859	IGHG2_HUMAN	Ig gamma-2 chain C region	3.269e+07	2.35159e+06	1.18468e+06	3.98379e+07	5.69693e+06	0	1.00716e+07	1.00777e+06	1.31976e+06	2.43841e+06	0	7.7666e+06	1.51812e+07	1.18019e+07	4.85759e+07	4.74216e+07	7.30485e+06	2.02634e+06	1.79372e+06	1.50781e+07	1.52961e+07	8.00865e+06	1.60798e+08	6.06796e+06	3.81196e+06	5.60133e+07	3.55484e+07	4.15954e+07	4.24336e+07	1.17147e+08	8.81786e+07	2.31175e+07	4.12099e+07	9.10542e+07	1.10711e+08	3.06897e+07	1.74774e+07	1.20238e+08	3.07222e+07	6.62883e+06	8.16824e+06
	P02766	TTHY_HUMAN	Transthyretin (ATTR) (Prealbumin) (TBPA)	3.47033e+07	1.36596e+07	7.68394e+06	3.79045e+07	1.80211e+07	8.45862e+06	1.69444e+07	9.65339e+06	1.90736e+07	1.04029e+07	1.54758e+07	1.20054e+07	1.66434e+07	1.86375e+07	6.95565e+07	4.35191e+07	2.06178e+07	2.64856e+07	7.00644e+06	1.93026e+07	2.01657e+07	2.98042e+07	3.72873e+07	3.97765e+07	3.32761e+07	2.24529e+07	5.37987e+07	6.88127e+07	5.07598e+07	4.22266e+07	3.14066e+07	5.43856e+07	5.16525e+07	2.52489e+07	3.91401e+07	2.40812e+07	4.0078e+07	1.44896e+08	2.2466e+07	3.11474e+07	3.15735e+07
	P01009	A1AT_HUMAN	Alpha-1-antitrypsin (Alpha-1 protease inhibitor) (Alpha-1-antiproteinase) (Serpin A1) [Cleaved into: Short peptide from AAT (SPAAT)]	2.46681e+07	6.49019e+06	4.33621e+06	4.7907e+07	7.91753e+06	3.96095e+06	4.70587e+06	5.94986e+06	4.33427e+06	8.0383e+06	5.45014e+06	1.35246e+07	2.13517e+07	2.35138e+07	4.54264e+07	5.36972e+07	6.88485e+06	8.99578e+06	1.11768e+07	2.94165e+07	2.60831e+07	6.78828e+06	3.40148e+07	2.11292e+06	863795	8.39485e+07	4.99309e+06	9.0781e+06	2.88617e+07	1.68347e+08	7.25691e+07	3.64109e+06	7.93495e+06	5.98555e+07	1.83235e+07	2.47121e+06	4.57234e+07	4.43875e+08	8.25334e+07	3.51441e+06	1.60493e+06
	P01834	IGKC_HUMAN	Ig kappa chain C region	5.22611e+07	3.95981e+06	1.91069e+06	3.44033e+07	1.01864e+07	0	2.35336e+06	1.38078e+06	1.54567e+06	4.31748e+06	1.7311e+06	6.10429e+06	1.39687e+07	1.34427e+07	2.94748e+07	5.50602e+07	1.58061e+07	4.84087e+06	2.33015e+06	3.0359e+07	2.96478e+07	1.54906e+07	7.20784e+07	4.73691e+06	1.78499e+06	1.4592e+08	3.2179e+07	3.97858e+07	4.38413e+07	1.88063e+08	7.26546e+07	1.81078e+07	4.58793e+07	1.89621e+08	7.73505e+07	2.52103e+07	2.44542e+07	8.67295e+07	5.48063e+07	3.92767e+06	1.00559e+07
	P02787	TRFE_HUMAN	Serotransferrin (Transferrin) (Beta-1 metal-binding globulin) (Siderophilin)	2.19794e+07	4.24509e+06	2.62533e+06	2.301e+07	3.83107e+06	1.13024e+06	2.02933e+06	2.02693e+06	2.03848e+06	3.83739e+06	2.13349e+06	5.55944e+06	1.0237e+07	8.35887e+06	2.54955e+07	2.56052e+07	6.43004e+06	3.55828e+06	3.54525e+06	1.84286e+07	1.5321e+07	7.34137e+06	1.16808e+08	1.0292e+07	6.55343e+06	1.1582e+08	7.21173e+07	9.36275e+07	1.20461e+08	1.18981e+08	1.26515e+08	5.23456e+07	9.50992e+07	5.46478e+07	7.46855e+07	3.21965e+07	3.31747e+07	2.22606e+08	3.05299e+07	1.34631e+07	2.41095e+07
	P02042	HBD_HUMAN	Hemoglobin subunit delta (Delta-globin) (Hemoglobin delta chain)	3.0778e+06	6.17273e+06	1.12241e+07	7.20822e+07	2.77487e+06	2.63208e+06	5.29118e+07	1.82263e+07	1.58564e+07	1.56019e+07	9.4858e+06	4.11409e+07	2.16289e+08	2.0261e+08	5.55481e+08	433411339	8.56468e+06	2.76502e+07	1.85128e+07	1.04536e+08	3.99134e+07	708830	5.79875e+06	0	1.01011e+06	2.45968e+06	0	0	0	0	1.46126e+06	0	0	0	4.73854e+06	499949	0	0	1.99339e+06	610918	688731
	P02790	HEMO_HUMAN	Hemopexin (Beta-1B-glycoprotein)	2.45454e+07	1.5998e+06	846894	1.71974e+07	5797957	0	1.88958e+06	988993	1.80044e+06	1.64204e+06	1.63966e+06	1.62949e+06	4.22218e+06	3.13878e+06	9.27865e+06	1.04997e+07	4.90307e+06	3.70406e+06	1.42627e+06	7.72552e+06	7.41817e+06	9.94124e+06	1.49735e+08	1.73675e+07	1.32877e+07	1.14896e+08	1.01541e+08	1.3026e+08	1.53142e+08	1.29043e+08	1.48061e+08	5.34815e+07	1.14371e+08	7.96631e+07	1.23911e+08	4.36351e+07	3.58369e+07	4.19801e+08	4.96804e+07	2.28494e+07	3.79814e+07
	P41222	PTGDS_HUMAN	Prostaglandin-H2 D-isomerase (EC 5.3.99.2) (Beta-trace protein) (Cerebrin-28) (Glutathione-independent PGD synthase) (Lipocalin-type prostaglandin-D synthase) (Prostaglandin-D2 synthase) (PGD2 synthase) (PGDS) (PGDS2)	9.22425e+06	9.32537e+06	3.82094e+06	3.01978e+07	4.04769e+06	0	8.78324e+06	1.87325e+06	2.20693e+06	7.63601e+06	3.94657e+06	1.19172e+07	2.6809e+07	1.80843e+07	7.74614e+07	5.01517e+07	1.87791e+07	1.63547e+07	5.89372e+06	2.065e+07	2.17524e+07	9.46757e+06	1.16261e+08	2.24806e+07	1.60925e+07	5.33191e+07	6.47605e+07	1.06309e+08	1.22198e+08	4.22381e+07	4.98867e+07	1.06364e+08	4.22122e+08	3.39619e+07	8.22012e+07	6.618e+07	1.01021e+08	5.09856e+08	1.565e+07	2.11439e+07	3.9799e+07
	P01876	IGHA1_HUMAN	Ig alpha-1 chain C region	2.82757e+07	707563	745630	2.98155e+07	4.30954e+06	0	1.67016e+06	0	635718	741612	0	3.44115e+06	1.02295e+07	1.05232e+07	3.62921e+07	2.74166e+07	2.74027e+06	699820	866958	30726675	3.66821e+07	1.27659e+06	0	3.03451e+06	0	2.00716e+08	1.65402e+08	1.71253e+08	1.6526e+08	1.48607e+08	2.70239e+08	5.4663e+07	1.52978e+08	1.98366e+08	4.25586e+08	1.13873e+08	1.04697e+07	2.49918e+08	4.92378e+07	1.87167e+07	4.48437e+07
	P00738	HPT_HUMAN	Haptoglobin (Zonulin) [Cleaved into: Haptoglobin alpha chain; Haptoglobin beta chain]	4.55305e+07	0	0	8.315e+06	6.46137e+06	0	485416	0	0	925131	0	1.82192e+06	4.78331e+06	3.48811e+06	7.7274e+06	7.62761e+06	319816	632523	313633	2.37044e+06	1.55011e+06	3.99808e+06	1.31071e+08	7.61874e+06	682526	1.91229e+08	8.81644e+07	1.207e+08	1.6795e+08	4.02076e+08	4.24055e+08	5.17447e+07	1.06902e+08	1.51406e+08	8.1858e+07	2.98511e+07	1.70179e+07	4.52071e+08	1.41001e+08	1.17941e+07	5.80143e+06
	P02763	A1AG1_HUMAN	Alpha-1-acid glycoprotein 1 (AGP 1) (Orosomucoid-1) (OMD 1)	1.33592e+07	4.99453e+06	3.71939e+06	7.50368e+07	4.48003e+06	0	5.14937e+06	3.44215e+06	1.96962e+06	9.78987e+06	2.77604e+06	7.78592e+06	1.83432e+07	1.9064e+07	4.40681e+07	5.01133e+07	6.97663e+06	1.28806e+07	8.89141e+06	5.79883e+07	5.13797e+07	7.44769e+06	1.35275e+08	6.53767e+06	2.94164e+06	1.80135e+08	5.15867e+07	1.12453e+08	1.03348e+08	1.80866e+08	1.90375e+08	2.88817e+07	1.38319e+08	1.35617e+08	2.2306e+07	4.7854e+07	6.32625e+07	8.92649e+08	1.12649e+08	7.84522e+06	3.99597e+06
	P01857	IGHG1_HUMAN	Ig gamma-1 chain C region	1.43586e+08	8.15511e+06	5.19822e+06	8.5341e+07	2.5119e+07	3.84878e+06	1.02845e+07	2.21862e+06	3.6078e+06	8.16328e+06	2.82198e+06	1.48619e+07	3.22411e+07	2.44135e+07	1.0288e+08	8.52978e+07	2.67447e+07	8.9505e+06	3.68152e+06	5.77571e+07	5.29484e+07	3.39265e+07	6.35103e+08	2.18943e+07	1.37448e+07	4.05644e+08	8.40504e+07	1.40829e+08	1.69178e+08	5.33467e+08	2.60745e+08	5.1932e+07	1.07588e+08	3.37466e+08	3.26074e+08	1.10885e+08	4.23943e+07	4.04437e+08	9.67284e+07	2.24574e+07	4.08133e+07
	P69905	HBA_HUMAN	Hemoglobin subunit alpha (Alpha-globin) (Hemoglobin alpha chain)	1.20737e+07	1.51544e+07	3.69034e+07	5.6116e+08	1.30701e+07	0	3.01118e+08	7.56602e+07	6.53109e+07	8.20144e+07	5.80611e+07	2.75909e+08	8.33994e+08	9.00176e+08	7.42196e+08	1.72603e+09	2.37849e+07	6.18826e+07	1.21289e+08	3.48054e+08	2.46026e+08	5.55965e+06	1.61469e+07	0	7.52357e+06	1.02775e+07	3.17169e+06	2.98593e+06	3.84961e+06	2.21465e+06	6.3629e+06	1.33321e+06	0	4.48648e+06	1.73893e+07	2.61711e+06	447499	0	4.576e+06	3.25654e+06	4.21594e+06
	Q96KR1	ZFR_HUMAN	Zinc finger RNA-binding protein (hZFR) (M-phase phosphoprotein homolog)	7.36849e+07	0	0	1.33426e+08	0	0	2.4155e+06	0	0	0	0	9.74304e+06	2.29304e+07	1.8375e+07	0	0	0	0	0	6.46989e+07	2.3396e+07	5.21328e+07	1.17648e+09	73192033	3.94449e+07	1.08744e+09	3.1082e+08	1.73308e+07	1.3862e+09	1.23656e+09	5.12099e+08	2.52766e+08	3.92165e+08	7.1413e+08	1.08313e+09	8.31556e+07	3.73229e+08	7.07046e+08	230761744	1.0051e+08	78181566
	P68871	HBB_HUMAN	Hemoglobin subunit beta (Beta-globin) (Hemoglobin beta chain) [Cleaved into: LVV-hemorphin-7; Spinorphin]	3.24865e+07	1.50238e+07	3.45255e+07	1.00207e+09	1.30725e+07	1.54147e+08	1.88391e+08	7.6191e+07	5.88921e+07	1.01707e+08	5.40645e+07	5.36912e+08	1.56727e+09	4.51817e+08	3.37148e+09	1.46549e+09	2.44719e+07	4.79028e+07	1.02165e+08	1.0715e+09	6.75706e+08	9.34774e+06	5.04189e+07	807183	1.39635e+07	3.48945e+07	3.74716e+06	3.36518e+06	4.38156e+06	1.04264e+06	1.25239e+07	738970	0	3.42787e+06	6.37302e+07	3.51996e+06	142127	599211	7.29519e+06	7.12483e+06	9.254e+06
	P02768	ALBU_HUMAN	Serum albumin	2.24618e+08	3.77876e+07	2.23798e+07	1.89045e+08	5.61792e+07	1.03363e+07	2.20327e+07	1.59317e+07	1.43787e+07	3.11002e+07	1.72207e+07	5.42546e+07	8.81871e+07	8.10477e+07	2.34392e+08	2.39895e+08	7.6625e+07	3.64016e+07	3.23222e+07	1.55693e+08	1.46223e+08	6.23902e+07	1.54263e+09	1.05491e+08	6.26846e+07	8.52973e+08	8.12311e+08	1.008e+09	1.55234e+09	9.9701e+08	1.36566e+09	4.37066e+08	8.51858e+08	5.57338e+08	8.96288e+08	2.83526e+08	2.80817e+08	1.91525e+09	2.84746e+08	1.21605e+08	1.19443e+08
