# Supplementary figures and images for: Cerebrospinal fluid proteome maps detect pathogen-specific host response patterns in meningitis
Source: eLife journal article supplement (doi:10.7554/elife.64159), 2021-04-06

a

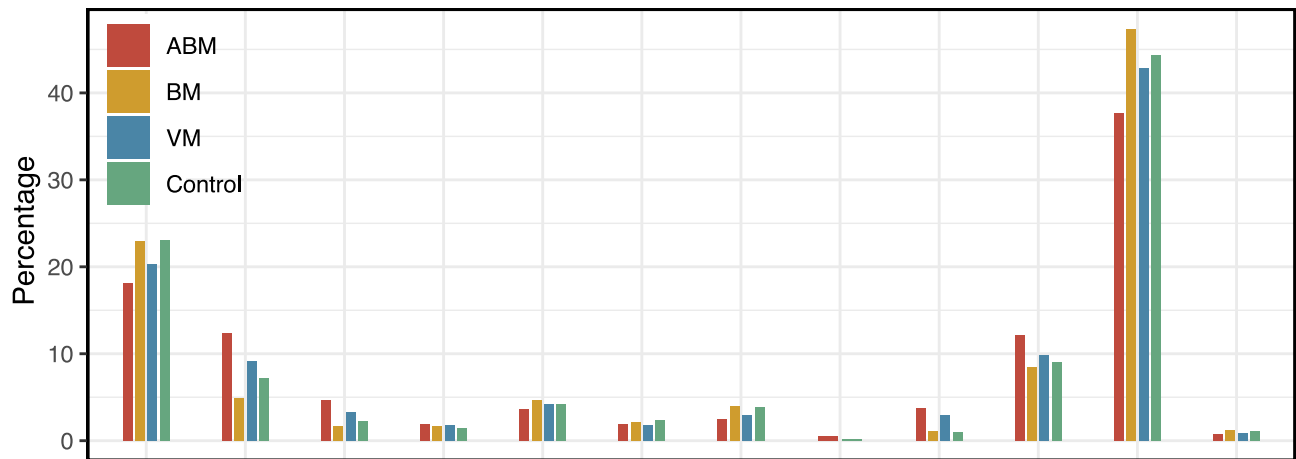

b

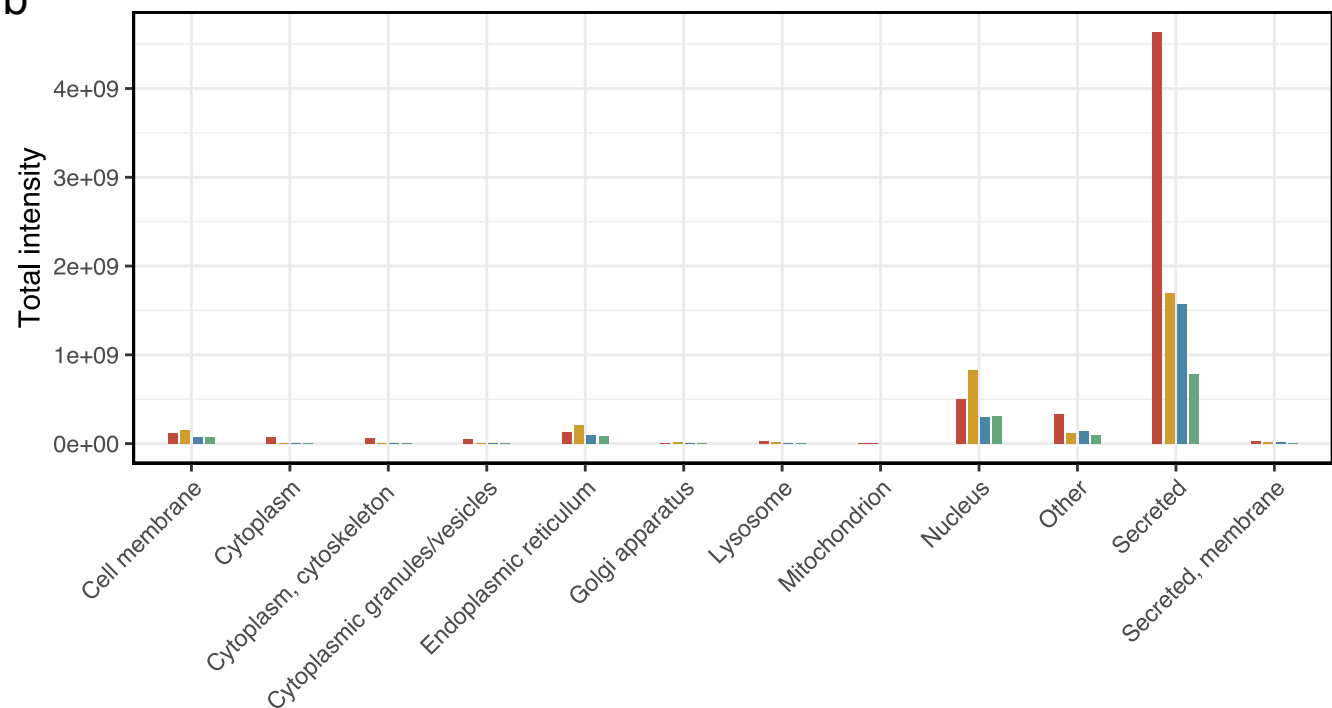

Supplement: supp [file elife-64159-supp-v1.zip]

a

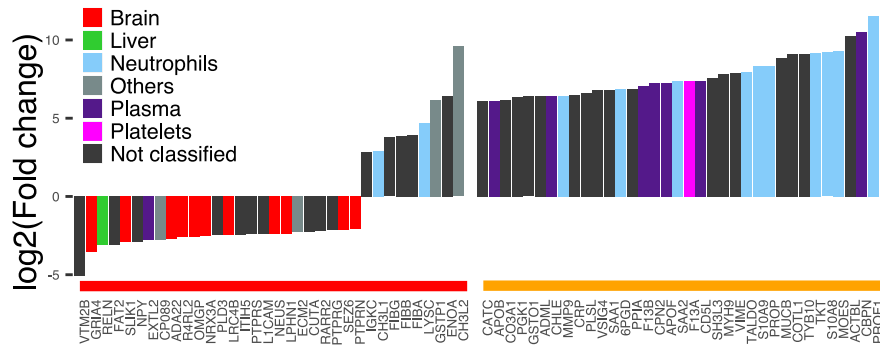

b

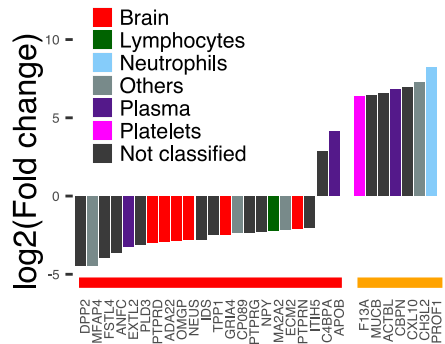

c

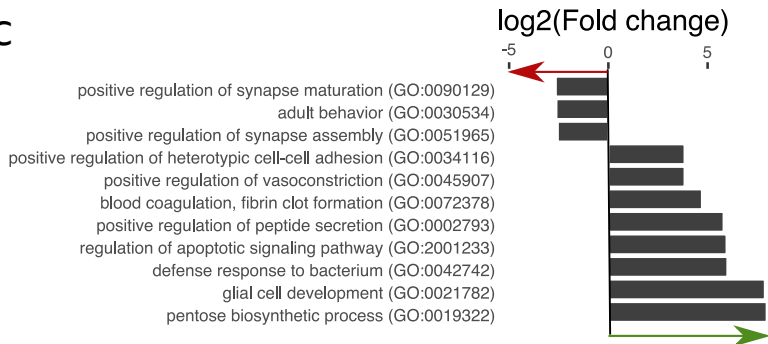

Supplement: supp [file elife-64159-supp-v1.zip]

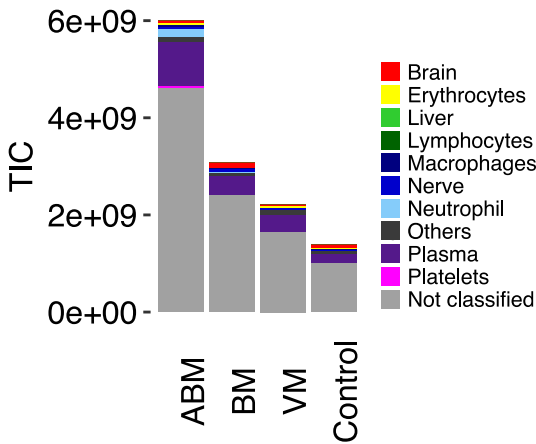

Supplement: supp [file elife-64159-supp-v1.zip]

**a**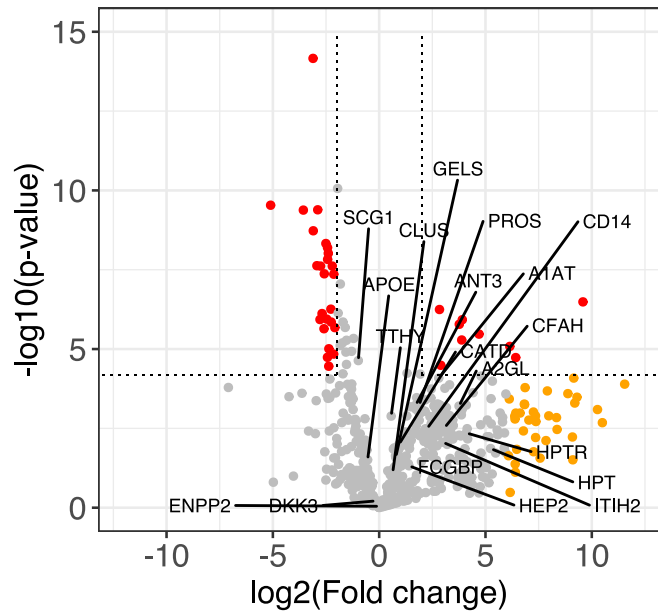**b**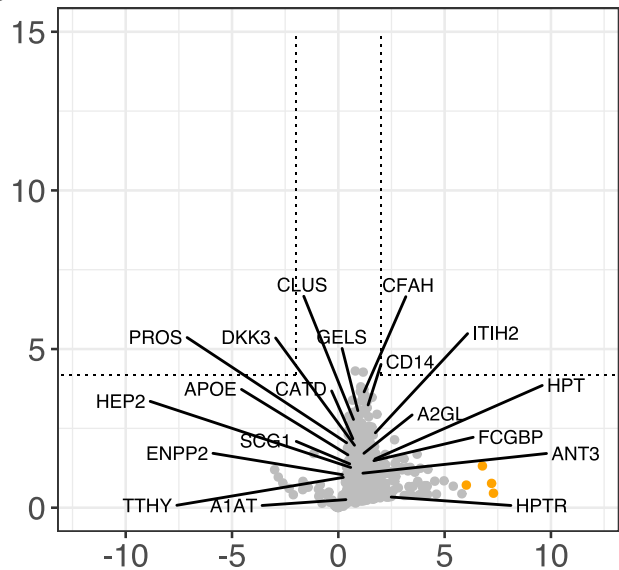**c**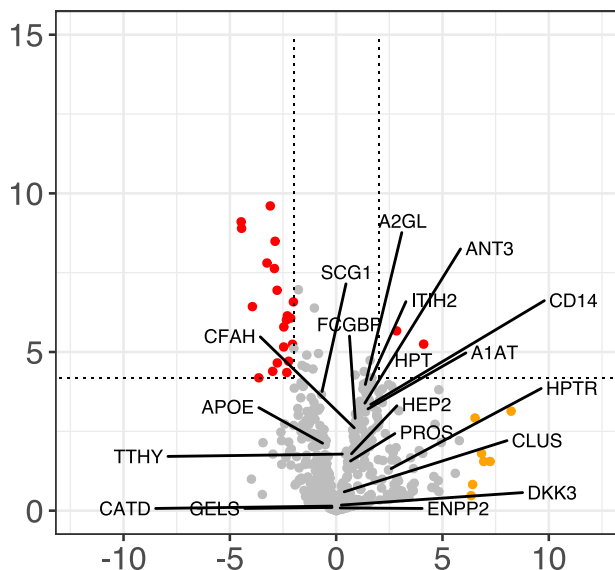

Supplement: supp [file elife-64159-supp-v1.zip]

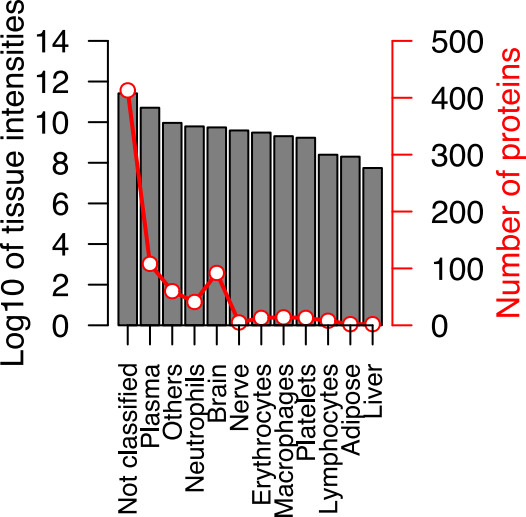

Supplement: supp [file elife-64159-supp-v1.zip]
